# Supplementary material for: De Novo Hybrid Assembly of the Salvia miltiorrhiza Mitochondrial Genome Provides the First Evidence of the Multi-Chromosomal Mitochondrial DNA Structure of Salvia Species
Source: MDPI journal article supplement (doi:10.3390/ijms232214267), 2022-11-17
Supplement: s1 [file s1]

## SUPPLEMENTARY MATERIALS

Article

# ***De novo* assembly of the *Salvia miltiorrhiza* mitochondrial genome using Pacbio long reads provides the first evidence of multi-chromosomal mitochondrial DNA structure of *Salvia* species**

Heyu Yang<sup>1,2</sup>, Haimei Chen<sup>2</sup>, Yang Ni<sup>2</sup>, Jingling Li<sup>2</sup>, Yisha Cai<sup>2</sup>, Binxin Ma<sup>2</sup>, Jing Yu<sup>2</sup>, Jiehua Wang<sup>1\*</sup>, Chang Liu<sup>2\*</sup>

<sup>1</sup> School of Environmental Science and Engineering, Tianjin University, Tianjin 300072, China

<sup>2</sup> Institute of Medicinal Plant Development, Chinese Academy of Medical Sciences, Peking Union Medical College, Beijing 100193, China

\* Correspondence: cliu6688@yahoo.com; Tel: +86-10-57833111; Fax: +86-10- 62899715; jiehuawang@tju.edu.cn; Tel: +86-022-87402072; Fax: +86-022-27407956

Table S1 Summary of sequence data generated by PacBio RS and Illumina platform.

| Sequencing platform                           | PacBio RS                  | Illumina                        |
|-----------------------------------------------|----------------------------|---------------------------------|
| Total number of nucleotides<br>(raw data, bp) | 19,434,039,998             | 16,380,908,800                  |
| Total Number of Reads                         | 1,408,786                  | 163,809,088                     |
| N50 Read Length                               | 19,289                     | NA                              |
| Mean Read Length (bp)                         | 13,794                     | 100                             |
| Mean Read Quality Score                       | 0.82                       | NA                              |
| Total Number of Mapped<br>Reads               | 23,959 (MC1), 13,431(MC2)  | 3,291,507 (MC1), 1,021,009(MC2) |
| Average Coverage Depth                        | 327.77 (MC1), 396.13 (MC2) | 969.556 (MC1), 903.15 (MC2)     |



Table S2 SSRs in the *S. multiorrhiza* mitogenome. “MC1/2”: mitogenome chromosome 1/2.

[illegible]

Table S3 Summary of SSRs in the mitogenome of Lamiales.

| accession number | species                          | Genome size | mononucleotides | dinucleotides | trinucleotides | tetranucleotides | pentanucleotides | hexanucleotides | Total |
|------------------|----------------------------------|-------------|-----------------|---------------|----------------|------------------|------------------|-----------------|-------|
| NC_023103        | <i>Ajuga reptans</i>             | 352069      | 7               | 15            | 16             | 36               | 6                | 0               | 80    |
| MW553042         | <i>Scutellaria tsinyunensis</i>  | 354073      | 15              | 15            | 16             | 41               | 3                | 0               | 90    |
| MN585275.1/6.1   | <i>Salvia miltiorrhiza</i>       | 414114      | 15              | 29            | 20             | 39               | 5                | 4               | 112   |
| NC_049064        | <i>Rothea serrata</i>            | 482114      | 14              | 19            | 17             | 34               | 8                | 3               | 95    |
| NC_031806        | <i>Castilleja paramensis</i>     | 495499      | 21              | 29            | 15             | 46               | 6                | 0               | 117   |
| NC_023209        | <i>Salvia miltiorrhiza</i>       | 499236      | 17              | 27            | 22             | 43               | 6                | 3               | 118   |
| NC_016741        | <i>Dorcocheras hygrometricum</i> | 510519      | 22              | 34            | 9              | 33               | 5                | 1               | 104   |
| NC_018041        | <i>Erythranthe guttata</i>       | 525671      | 36              | 17            | 14             | 44               | 8                | 1               | 120   |
| NC_031323        | <i>Hesperelaea palmeri</i>       | 658522      | 50              | 40            | 28             | 64               | 8                | 0               | 190   |
| NC_034982        | <i>Utricularia reniformis</i>    | 857234      | 36              | 33            | 26             | 63               | 4                | 2               | 164   |

Table S4 Tandem repeats in the mitogenome of the Lamiales.

| accession_number | Indices       | Period<br>size(bp) | Copy<br>Number | Consensus<br>Size (bp) | Percent<br>Matches | Percent<br>Indels | Score | Bases number |    |    |    | Entropy<br>(0–2) |
|------------------|---------------|--------------------|----------------|------------------------|--------------------|-------------------|-------|--------------|----|----|----|------------------|
|                  |               |                    |                |                        |                    |                   |       | A            | G  | C  | T  |                  |
| MN585276.1       | 194570-194609 | 15                 | 2.5            | 16                     | 88                 | 8                 | 55    | 70           | 17 | 2  | 10 | 1.27             |
| MN585275.1       | 358379-358424 | 21                 | 2.1            | 22                     | 88                 | 11                | 69    | 50           | 0  | 0  | 50 | 1                |
| MN585275.1       | 402285-402332 | 16                 | 2.9            | 16                     | 76                 | 14                | 53    | 33           | 20 | 12 | 33 | 1.9              |
| NC_016741        | 5295-5330     | 17                 | 2.1            | 17                     | 89                 | 0                 | 54    | 41           | 11 | 5  | 41 | 1.64             |
| NC_016741        | 208537-208578 | 19                 | 2.2            | 20                     | 87                 | 12                | 61    | 52           | 7  | 26 | 14 | 1.67             |
| NC_016741        | 237481-237523 | 21                 | 2              | 21                     | 95                 | 0                 | 77    | 27           | 11 | 32 | 27 | 1.92             |
| NC_016741        | 283955-283988 | 16                 | 2              | 16                     | 88                 | 11                | 50    | 58           | 0  | 0  | 41 | 0.98             |
| NC_016741        | 364263-364297 | 18                 | 2              | 17                     | 88                 | 5                 | 52    | 5            | 11 | 11 | 71 | 1.3              |
| NC_018041        | 9641-9681     | 20                 | 2              | 20                     | 100                | 0                 | 82    | 24           | 12 | 19 | 43 | 1.85             |
| NC_018041        | 31116-31183   | 18                 | 3.8            | 18                     | 98                 | 0                 | 127   | 38           | 22 | 16 | 23 | 1.93             |
| NC_018041        | 65710-65739   | 16                 | 1.9            | 15                     | 93                 | 6                 | 51    | 43           | 13 | 30 | 13 | 1.82             |
| NC_018041        | 94432-94509   | 40                 | 1.9            | 42                     | 81                 | 5                 | 97    | 17           | 20 | 21 | 39 | 1.92             |
| NC_018041        | 104253-104302 | 24                 | 2.1            | 24                     | 96                 | 0                 | 91    | 40           | 18 | 20 | 22 | 1.92             |
| NC_018041        | 120892-120935 | 14                 | 3.1            | 14                     | 90                 | 6                 | 63    | 72           | 6  | 2  | 18 | 1.17             |
| NC_018041        | 163482-163508 | 13                 | 2.1            | 13                     | 100                | 0                 | 54    | 14           | 22 | 0  | 62 | 1.31             |
| NC_018041        | 180754-180796 | 21                 | 2              | 21                     | 100                | 0                 | 86    | 32           | 37 | 18 | 11 | 1.87             |
| NC_018041        | 222539-222579 | 20                 | 2              | 20                     | 100                | 0                 | 82    | 43           | 19 | 12 | 24 | 1.85             |
| NC_018041        | 234667-234691 | 12                 | 2.1            | 12                     | 100                | 0                 | 50    | 44           | 8  | 32 | 16 | 1.76             |
| NC_018041        | 241974-242009 | 18                 | 1.9            | 19                     | 88                 | 5                 | 56    | 36           | 33 | 2  | 27 | 1.72             |
| NC_018041        | 270916-271069 | 69                 | 2.2            | 69                     | 84                 | 2                 | 202   | 25           | 18 | 18 | 38 | 1.93             |
| NC_018041        | 270941-271089 | 69                 | 2.2            | 69                     | 86                 | 4                 | 203   | 24           | 21 | 15 | 38 | 1.92             |

|           |               |    |      |    |     |    |     |    |    |    |    |      |
|-----------|---------------|----|------|----|-----|----|-----|----|----|----|----|------|
| NC_018041 | 327462-327529 | 34 | 2    | 34 | 94  | 0  | 118 | 20 | 32 | 17 | 29 | 1.96 |
| NC_018041 | 331088-331149 | 31 | 2    | 31 | 90  | 0  | 97  | 11 | 22 | 16 | 50 | 1.76 |
| NC_018041 | 332369-332410 | 21 | 2    | 21 | 95  | 0  | 75  | 9  | 40 | 19 | 30 | 1.83 |
| NC_018041 | 334170-334225 | 30 | 2    | 28 | 86  | 13 | 80  | 26 | 12 | 44 | 16 | 1.83 |
| NC_018041 | 341742-341805 | 21 | 3    | 21 | 100 | 0  | 128 | 28 | 29 | 9  | 32 | 1.88 |
| NC_018041 | 346877-346912 | 18 | 2    | 18 | 100 | 0  | 72  | 38 | 0  | 44 | 16 | 1.48 |
| NC_018041 | 351394-351431 | 18 | 2.1  | 18 | 95  | 0  | 67  | 34 | 18 | 18 | 28 | 1.95 |
| NC_018041 | 376089-376127 | 20 | 2    | 20 | 84  | 0  | 51  | 0  | 28 | 10 | 61 | 1.28 |
| NC_018041 | 406948-406991 | 20 | 2.2  | 20 | 100 | 0  | 88  | 31 | 13 | 22 | 31 | 1.93 |
| NC_018041 | 472313-472338 | 13 | 2    | 13 | 100 | 0  | 52  | 38 | 0  | 15 | 46 | 1.46 |
| NC_018041 | 479695-479737 | 21 | 2    | 21 | 90  | 0  | 68  | 39 | 20 | 23 | 16 | 1.92 |
| NC_018041 | 481207-481232 | 12 | 2.2  | 12 | 100 | 0  | 52  | 26 | 34 | 15 | 23 | 1.94 |
| NC_031323 | 168064-168145 | 36 | 2.3  | 36 | 100 | 0  | 164 | 23 | 21 | 30 | 24 | 1.99 |
| NC_031323 | 180046-180072 | 14 | 1.9  | 14 | 100 | 0  | 54  | 66 | 11 | 22 | 0  | 1.22 |
| NC_031323 | 182710-182752 | 21 | 2    | 21 | 86  | 8  | 61  | 34 | 25 | 20 | 18 | 1.96 |
| NC_031323 | 298153-298182 | 11 | 2.7  | 11 | 94  | 0  | 51  | 40 | 0  | 0  | 60 | 0.97 |
| NC_031323 | 333953-333989 | 18 | 2.1  | 18 | 100 | 0  | 74  | 62 | 0  | 27 | 10 | 1.28 |
| NC_031323 | 379363-379401 | 18 | 2.2  | 18 | 95  | 0  | 69  | 30 | 7  | 25 | 35 | 1.84 |
| NC_031323 | 405342-405383 | 2  | 22.5 | 2  | 81  | 13 | 54  | 47 | 2  | 0  | 50 | 1.14 |
| NC_031323 | 407129-407168 | 19 | 2.1  | 19 | 90  | 0  | 62  | 35 | 7  | 12 | 45 | 1.7  |
| NC_031323 | 452885-452923 | 20 | 2    | 20 | 89  | 0  | 60  | 28 | 15 | 30 | 25 | 1.96 |
| NC_031323 | 479717-479747 | 15 | 2.1  | 15 | 93  | 0  | 53  | 45 | 16 | 6  | 32 | 1.72 |
| NC_031323 | 491285-491325 | 21 | 2    | 21 | 95  | 0  | 73  | 34 | 9  | 26 | 29 | 1.88 |
| NC_031323 | 541075-541103 | 14 | 2.1  | 14 | 100 | 0  | 58  | 58 | 6  | 6  | 27 | 1.5  |
| NC_031323 | 552386-552442 | 24 | 2.4  | 24 | 100 | 0  | 114 | 8  | 29 | 22 | 38 | 1.85 |
| NC_031323 | 552386-552452 | 24 | 2.8  | 24 | 93  | 0  | 98  | 8  | 26 | 20 | 43 | 1.82 |

|           |               |    |     |    |     |    |     |    |    |    |    |      |
|-----------|---------------|----|-----|----|-----|----|-----|----|----|----|----|------|
| NC_031806 | 110400-110425 | 13 | 2   | 13 | 100 | 0  | 52  | 46 | 15 | 0  | 38 | 1.46 |
| NC_031806 | 237194-237259 | 24 | 2.8 | 24 | 92  | 0  | 114 | 48 | 7  | 18 | 25 | 1.74 |
| NC_031806 | 312354-312413 | 18 | 3.3 | 18 | 97  | 0  | 111 | 33 | 26 | 10 | 30 | 1.89 |
| NC_031806 | 312354-312423 | 18 | 4.1 | 17 | 92  | 5  | 81  | 35 | 25 | 8  | 30 | 1.86 |
| NC_031806 | 330781-330817 | 18 | 2.1 | 18 | 94  | 0  | 65  | 29 | 24 | 18 | 27 | 1.98 |
| NC_031806 | 331981-332011 | 15 | 2.1 | 15 | 100 | 0  | 62  | 35 | 25 | 0  | 38 | 1.56 |
| NC_031806 | 332124-332170 | 24 | 2   | 24 | 82  | 0  | 58  | 23 | 14 | 31 | 29 | 1.95 |
| NC_031806 | 350079-350144 | 24 | 2.8 | 24 | 95  | 0  | 114 | 22 | 21 | 15 | 40 | 1.9  |
| NC_031806 | 350132-350195 | 18 | 3.6 | 18 | 89  | 0  | 92  | 20 | 34 | 17 | 28 | 1.95 |
| NC_031806 | 402577-402606 | 15 | 2   | 15 | 100 | 0  | 60  | 40 | 6  | 13 | 40 | 1.71 |
| NC_031806 | 440298-440340 | 19 | 2.6 | 15 | 75  | 25 | 50  | 25 | 6  | 11 | 55 | 1.6  |
| NC_031806 | 440304-440341 | 19 | 2   | 19 | 100 | 0  | 76  | 26 | 5  | 10 | 57 | 1.53 |
| NC_031806 | 457267-457310 | 22 | 2   | 22 | 95  | 0  | 79  | 31 | 29 | 27 | 11 | 1.91 |
| NC_031806 | 481432-481456 | 12 | 2.1 | 12 | 100 | 0  | 50  | 8  | 24 | 28 | 40 | 1.83 |
| NC_034982 | 263418-263464 | 24 | 2   | 24 | 86  | 0  | 67  | 29 | 21 | 25 | 23 | 1.99 |
| NC_034982 | 264919-264970 | 28 | 2   | 25 | 85  | 14 | 70  | 17 | 42 | 11 | 28 | 1.84 |
| NC_034982 | 337073-337105 | 16 | 2.1 | 16 | 94  | 0  | 57  | 36 | 18 | 27 | 18 | 1.94 |
| NC_034982 | 427450-427497 | 25 | 2   | 23 | 84  | 15 | 62  | 37 | 12 | 33 | 16 | 1.86 |
| NC_034982 | 681553-681610 | 21 | 2.8 | 21 | 80  | 10 | 57  | 44 | 15 | 27 | 12 | 1.82 |
| NC_023103 | 110693-110742 | 25 | 2   | 25 | 100 | 0  | 100 | 28 | 28 | 4  | 40 | 1.74 |
| NC_023103 | 208003-208043 | 21 | 2   | 21 | 100 | 0  | 82  | 46 | 4  | 14 | 34 | 1.66 |
| NC_023103 | 246827-246860 | 16 | 2.1 | 17 | 88  | 5  | 52  | 47 | 8  | 5  | 38 | 1.59 |
| NC_023103 | 246807-246864 | 19 | 2.9 | 21 | 71  | 23 | 52  | 41 | 8  | 8  | 41 | 1.66 |
| NC_023103 | 342398-342426 | 14 | 2.1 | 14 | 100 | 0  | 58  | 27 | 6  | 13 | 51 | 1.66 |
| NC_023209 | 21035-21082   | 16 | 2.9 | 16 | 76  | 14 | 53  | 33 | 12 | 20 | 33 | 1.9  |
| NC_023209 | 147782-147836 | 24 | 2.5 | 22 | 85  | 8  | 67  | 14 | 23 | 12 | 49 | 1.78 |

|           |               |    |      |    |     |   |     |    |    |    |    |      |
|-----------|---------------|----|------|----|-----|---|-----|----|----|----|----|------|
| NC_023209 | 147804-147871 | 21 | 3.2  | 21 | 77  | 8 | 75  | 11 | 22 | 10 | 55 | 1.65 |
| NC_023209 | 150188-150242 | 18 | 3.1  | 18 | 91  | 0 | 83  | 29 | 9  | 25 | 36 | 1.87 |
| NC_023209 | 172593-172632 | 15 | 2.5  | 17 | 88  | 8 | 57  | 10 | 17 | 2  | 70 | 1.27 |
| NC_023209 | 295019-295071 | 21 | 2.5  | 22 | 87  | 9 | 74  | 49 | 0  | 0  | 50 | 1    |
| NC_023209 | 371146-371177 | 16 | 2    | 16 | 93  | 0 | 55  | 25 | 21 | 15 | 37 | 1.93 |
| NC_049064 | 81772-81806   | 16 | 2.3  | 16 | 90  | 5 | 54  | 2  | 37 | 14 | 45 | 1.59 |
| NC_049064 | 132247-132300 | 15 | 3.6  | 15 | 94  | 0 | 90  | 40 | 11 | 29 | 18 | 1.85 |
| NC_049064 | 160514-160561 | 6  | 8    | 6  | 100 | 0 | 96  | 33 | 33 | 0  | 33 | 1.58 |
| NC_049064 | 185885-185910 | 13 | 2    | 13 | 100 | 0 | 52  | 46 | 15 | 0  | 38 | 1.46 |
| NC_049064 | 269642-269742 | 24 | 4.2  | 24 | 96  | 0 | 175 | 35 | 3  | 35 | 24 | 1.74 |
| NC_049064 | 283791-283836 | 23 | 2    | 23 | 91  | 8 | 76  | 13 | 26 | 13 | 47 | 1.78 |
| NC_049064 | 334317-334395 | 26 | 3    | 26 | 100 | 0 | 158 | 26 | 18 | 15 | 39 | 1.91 |
| NC_049064 | 340274-340318 | 23 | 1.9  | 24 | 90  | 4 | 74  | 51 | 15 | 26 | 6  | 1.68 |
| NC_049064 | 422418-422487 | 6  | 11.7 | 6  | 100 | 0 | 140 | 17 | 31 | 0  | 51 | 1.45 |
| NC_049064 | 470684-470718 | 18 | 1.9  | 18 | 88  | 0 | 52  | 54 | 8  | 8  | 28 | 1.6  |
| MW553042  | 24043-24082   | 15 | 2.5  | 16 | 88  | 8 | 55  | 70 | 2  | 17 | 10 | 1.27 |
| MW553042  | 33394-33438   | 22 | 2    | 22 | 82  | 0 | 54  | 20 | 22 | 15 | 42 | 1.89 |
| MW553042  | 100394-100439 | 23 | 2    | 23 | 91  | 8 | 76  | 47 | 13 | 26 | 13 | 1.78 |
| MW553042  | 162197-162267 | 37 | 1.9  | 37 | 94  | 0 | 124 | 14 | 14 | 50 | 21 | 1.77 |
| MW553042  | 216408-216447 | 20 | 2    | 20 | 95  | 0 | 71  | 0  | 32 | 10 | 57 | 1.32 |
| MW553042  | 320051-320098 | 24 | 2    | 24 | 91  | 0 | 78  | 33 | 20 | 39 | 6  | 1.78 |

Table S5 PCR primers used to validate recombination products of the nine repeats in the *S. miltiorrhiza* mitogenome.

| Primer Name | Primer Sequence        |
|-------------|------------------------|
| sami-r01-F1 | CAGTCTATTTGCCCCTGTCC   |
| sami-r01-R1 | TAATCGACGGCTGCTAACTCG  |
| sami-r01-F2 | AGGTTTACATTCCTCCCTGCA  |
| sami-r01-R2 | ACCCTTATTCCGGTGTCCCT   |
| sami-r02-F1 | ATGGGGTGGAAGTGGAGATG   |
| sami-r02-R1 | TCCCATCTTGATTTGCCCTCT  |
| sami-r02-F2 | TTGACCGGAACTGGAGTCTC   |
| sami-r02-R2 | CGCTGATCTGATCCTCCCTT   |
| sami-r03-F1 | CACCAGTAGCCAAGGAAGGA   |
| sami-r03-R1 | GAAAACACGCCCTCTTTGGT   |
| sami-r03-F2 | TCCTCAACCTCATCTGCAGC   |
| sami-r03-R2 | GGAAGAGCACGAACAAGAGC   |
| sami-r04-F1 | CAACGTCGCTTGGATCAGAG   |
| sami-r04-R1 | AGCGCCGAGAGATCTGTAA    |
| sami-r04-F2 | GCTTTATGGTCCCTGTCCCT   |
| sami-r04-R2 | TGGTGGTTGAGTAAGGGCAT   |
| sami-r05-F1 | GTCTTCGAGCCAGTACCCTT   |
| sami-r05-R1 | TTGGGCATGAATGGAGCTTG   |
| sami-r05-F2 | TAACCATCACAGGACCCGAC   |
| sami-r05-R2 | CCCCAGAGTGTGCCTTTCTT   |
| sami-r06-F1 | TGAACCGAGGACTCTTGCTT   |
| sami-r06-R1 | CAAGTGAGTGAGTGGCAGTG   |
| sami-r06-F2 | TCTTTCCCCTCACAAGCCAT   |
| sami-r06-R2 | CCAGGCCCATCAGACCATAA   |
| sami-r07-F1 | CTACGCGCGTATACTGGTTG   |
| sami-r07-R1 | CGTAGTTGATGATTCCGCCG   |
| sami-r07-F2 | CGCCCGGATACAAAGGAATC   |
| sami-r07-R2 | CTCCCCATATTCCCCACTCA   |
| sami-r08-F1 | CTGAGGGTAGGGTTAAGGGC   |
| sami-r08-R1 | GCCCCAAGAAGCATCAAACA   |
| sami-r08-F2 | CATCTCCGCTACTCCACTC    |
| sami-r08-R2 | ACCTATCATCGCCGGCATAA   |
| sami-r09-F1 | ACACCTCAGGCCCCCTTTATC  |
| sami-r09-R1 | CCCGGGTTAACTCTTCCAT    |
| sami-r09-F2 | GCTCTGAAAACCACCTCAAATC |
| sami-r09-R2 | AGAAAGTATGAGGCCCCGTCC  |

Table S6 Chloroplast DNA insertions in the *S. miltiorrhiza* mitogenome. The three longest regions (sami-mtpt-001, sami-mtpt-002, and sami-mtpt-012) similar to the mitogenome sequence are indicated with “\*”. “MC1/2”: mitogenome chromosome 1/2, frag: fragment.

| MTPT ID       | Name of Circular molecule | Identity (%) | Alignment Length (bp) | Number of Mismatches | Number of Gap openings | Positions on the Chloroplast Genome |       | Positions on the Mitochondrial Genome |        | Genes Located in the MTPT Fragments      | E value  | Score |
|---------------|---------------------------|--------------|-----------------------|----------------------|------------------------|-------------------------------------|-------|---------------------------------------|--------|------------------------------------------|----------|-------|
|               |                           |              |                       |                      |                        | Start                               | End   | Start                                 | End    |                                          |          |       |
| sami-mtpt01   | MC1                       | 98.10        | 1949*                 | 23                   | 6                      | 70841                               | 72786 | 72166                                 | 70229  | <i>psbB</i> -frag                        | 0        | 3382  |
| sami-mtpt-002 | MC1                       | 99.71        | 1737*                 | 2                    | 1                      | 63951                               | 65684 | 308153                                | 309889 | <i>petL,petG,trnW-CCA,trnP-UGG</i> -frag | 0        | 3177  |
| sami-mtpt-003 | MC1                       | 100          | 623                   | 0                    | 0                      | 32783                               | 33405 | 230470                                | 229848 | <i>psbC</i> -frag                        | 0        | 1151  |
| sami-mtpt-004 | MC1                       | 100          | 135                   | 0                    | 0                      | 32376                               | 32510 | 264504                                | 264638 | <i>psbD</i> -frag                        | 2.06E-65 | 250   |
| sami-mtpt-005 | MC1                       | 75.22        | 452                   | 102                  | 9                      | 10441                               | 10887 | 119207                                | 118761 | <i>atpA</i> -frag                        | 4.52E-52 | 206   |
| sami-mtpt-006 | MC1                       | 94.03        | 134                   | 7                    | 1                      | 40981                               | 41113 | 264689                                | 264822 | <i>psaA</i> -frag                        | 5.85E-51 | 202   |
| sami-mtpt-007 | MC1                       | 87.64        | 178                   | 11                   | 6                      | 45376                               | 45553 | 298972                                | 299138 | <i>rps4</i> -frag                        | 2.72E-49 | 196   |
| sami-mtpt-008 | MC1                       | 94.78        | 115                   | 6                    | 0                      | 44704                               | 44818 | 298852                                | 298966 | <i>trnS-GGA</i>                          | 2.74E-44 | 180   |



|                   |     |       |       |    |   |        |        |        |        |                                                           |           |      |
|-------------------|-----|-------|-------|----|---|--------|--------|--------|--------|-----------------------------------------------------------|-----------|------|
| sami-<br>mtpt-009 | MC1 | 91.04 | 134   | 2  | 3 | 132622 | 132754 | 164757 | 164881 | <i>trnI</i> -GAU-frag                                     | 4.59E-42  | 172  |
| sami-<br>mtpt-010 | MC1 | 90.07 | 131   | 12 | 1 | 29796  | 29925  | 298382 | 298252 | <i>trnD</i> -GUC                                          | 5.93E-41  | 169  |
| sami-<br>mtpt-011 | MC2 | 99.92 | 4987* | 3  | 1 | 51184  | 56169  | 78467  | 73481  | <i>trnM</i> -CAU, <i>atpE</i> , <i>atpB</i> , <i>rbcL</i> | 0.00E+00  | 9186 |
| sami-<br>mtpt-012 | MC2 | 99.52 | 632   | 3  | 0 | 37959  | 38590  | 23985  | 24616  |                                                           | 0.00E+00  | 1151 |
| sami-<br>mtpt-013 | MC2 | 98.79 | 332   | 4  | 0 | 23320  | 23651  | 30454  | 30785  |                                                           | 7.69E-169 | 592  |
| sami-<br>mtpt-014 | MC2 | 88.73 | 355   | 33 | 2 | 717    | 1070   | 21738  | 22086  |                                                           | 2.30E-119 | 427  |
| sami-<br>mtpt-015 | MC2 | 100   | 214   | 0  | 0 | 83019  | 83232  | 53309  | 53522  |                                                           | 6.47E-110 | 396  |
| sami-<br>mtpt-016 | MC2 | 76.37 | 127   | 30 | 0 | 40230  | 40356  | 24032  | 24158  |                                                           | 1.60E-11  | 69.4 |

---

Figure S1. Comparison of the sequences of the plastome assembled in this study and NC\_020341.1 of *S. miltiorrhiza*. The X-axis shows the nucleotide sequence of plastome assembled in this study, and the Y-axis displays the nucleotide sequence of NC\_020341.1.

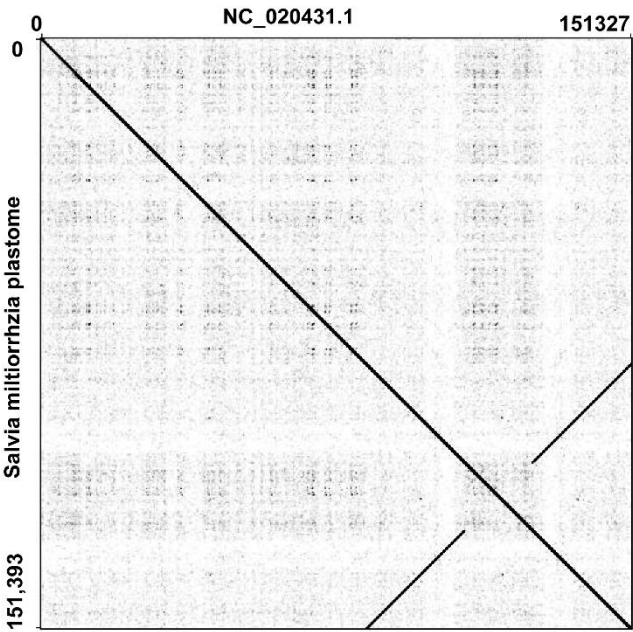

Figure S2. Alignments of long PacBio reads to the four conformations of the seven DBS (bs01–bs07) found in the unitig graph. The unitig graph was generated using Unicycler from Illumina reads, which were filtered with GetOrganelle for mitochondrial reads. Mac corresponds to the connection of shared contigs and their flanking contigs found in MC1 and MC2 (Fig. 1B). Mic corresponds to the alternative connection of the shared contigs and their flanking contigs that are not found in MC1 and MC2. Panels a–g show Mac1 and Mac2 and Mic1 and Mic2 of bs01–bs07, respectively. The figure in each panel can be divided into the top and bottom parts. The top part shows a bird's eye view, whereas the bottom part reveals a base-level view. At the bottom part of the figure, the DBS ID, length of shared contig, and conformation name are shown. The boundaries of shared contig are indicated with red vertical lines. The contigs in the DBS are shown as the red line having arrows at each end. It was labeled as the “repeat region”.

a

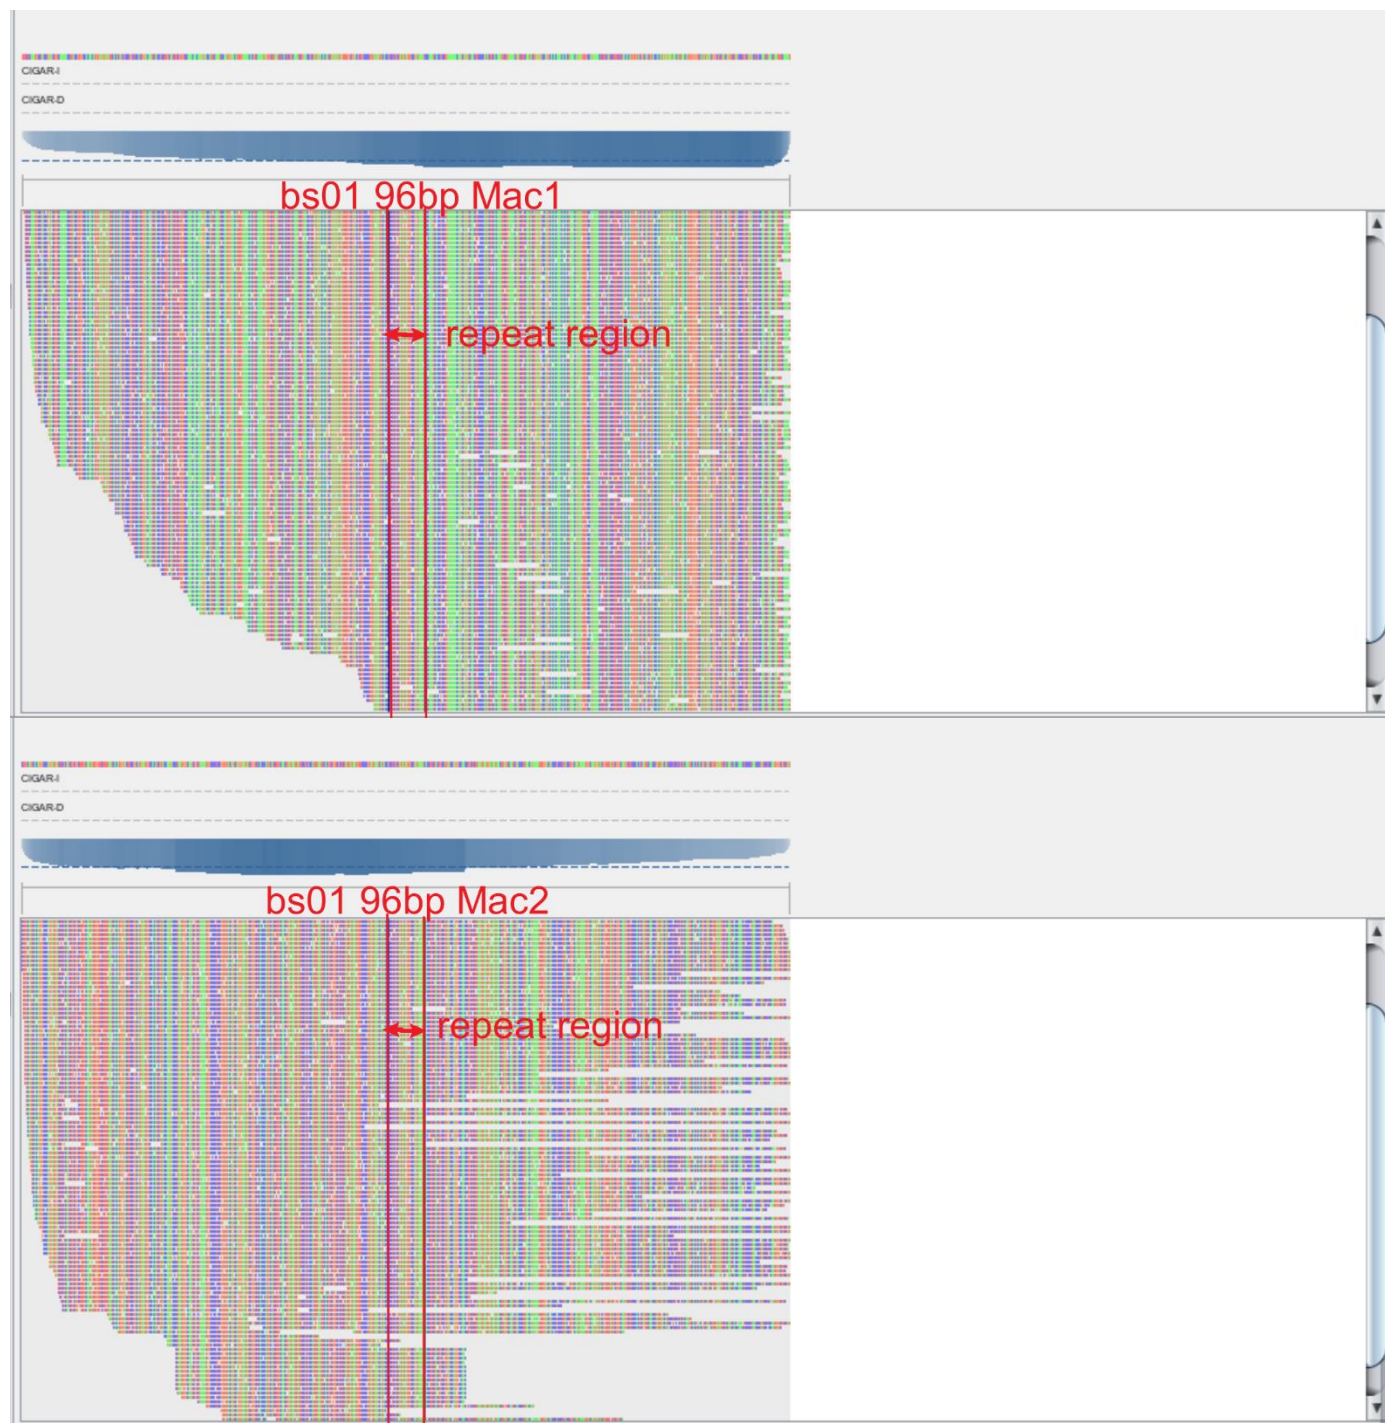

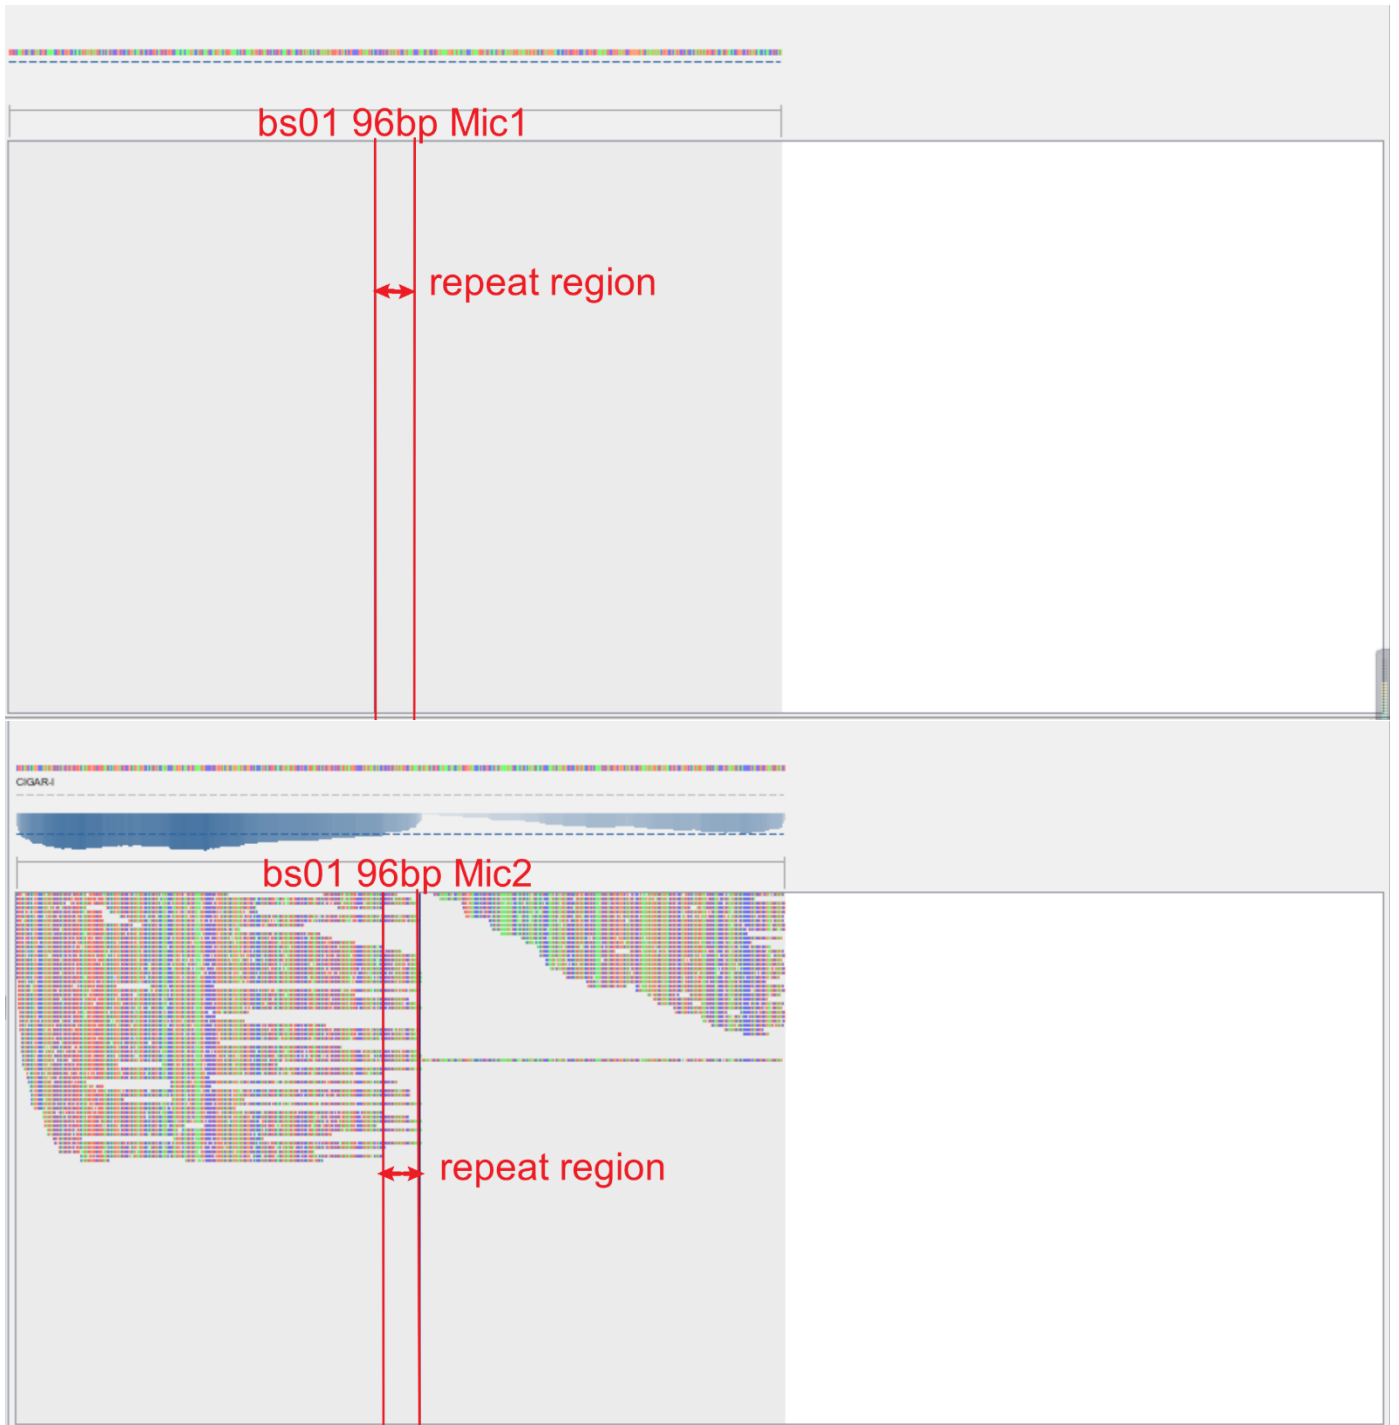



b

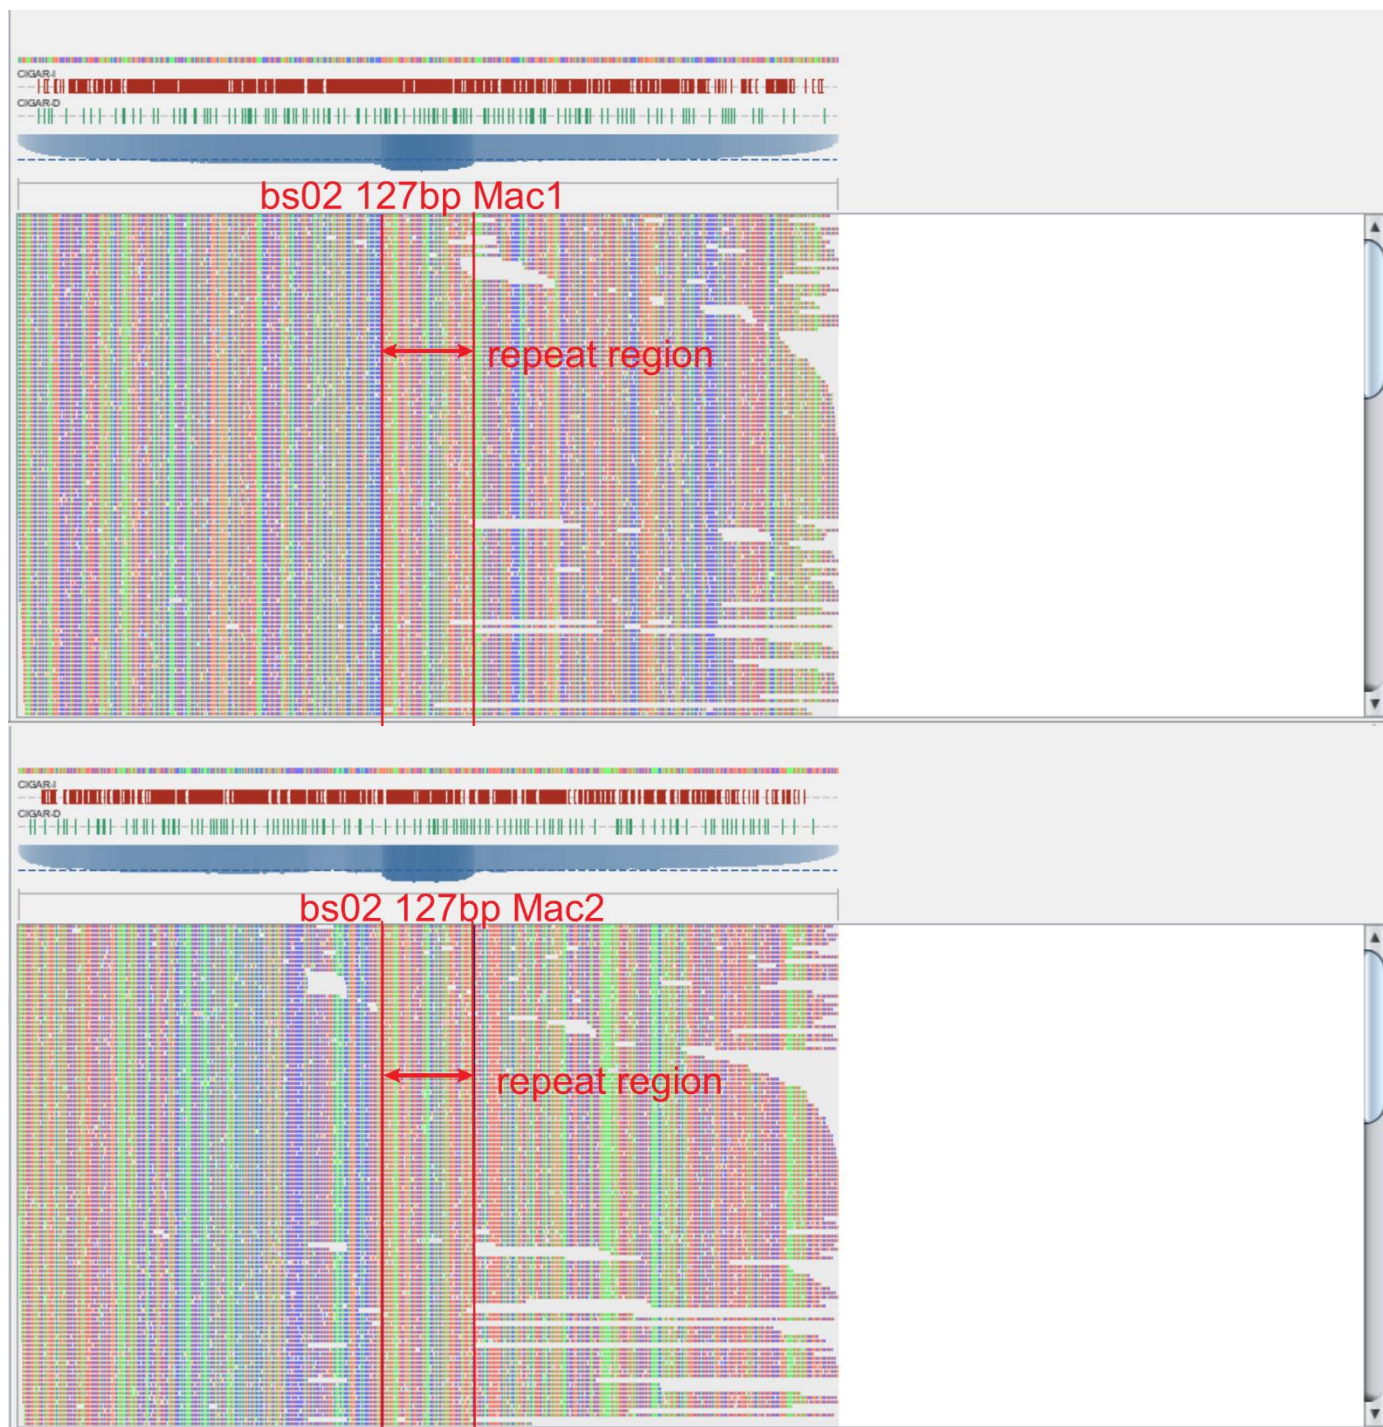

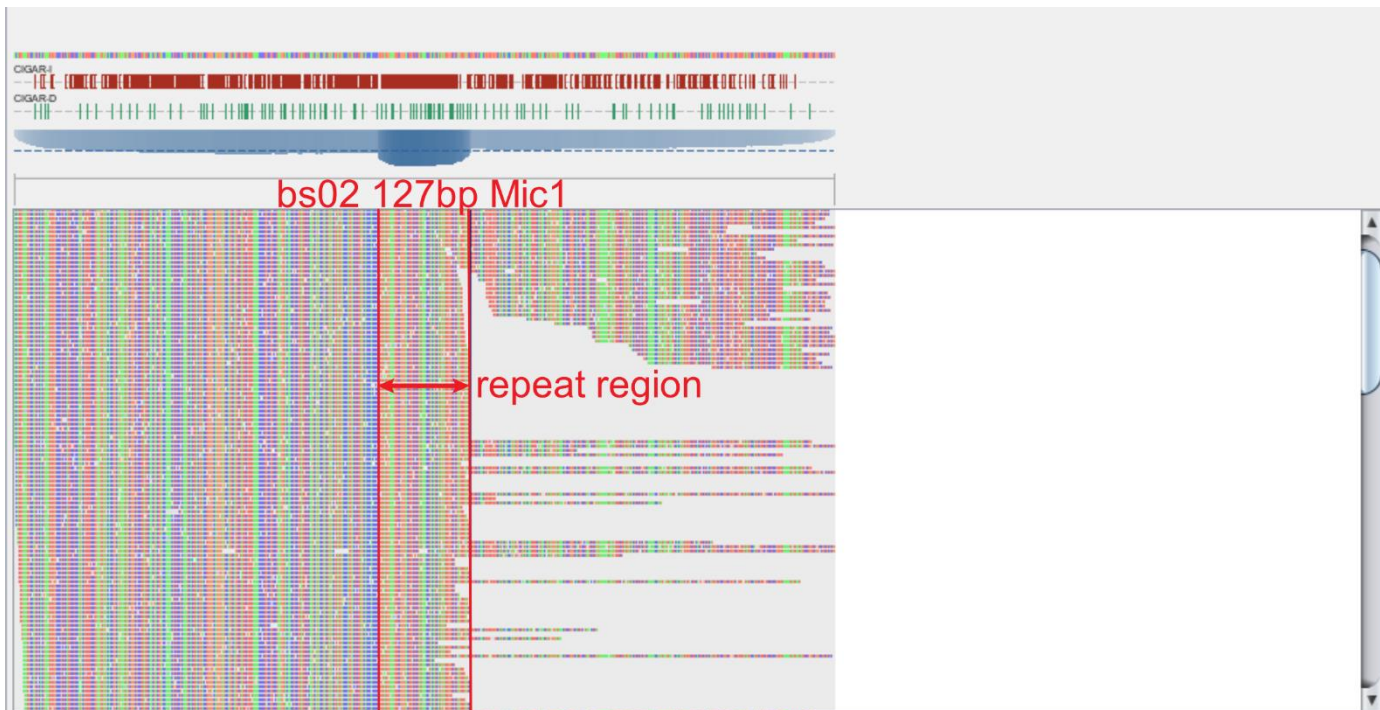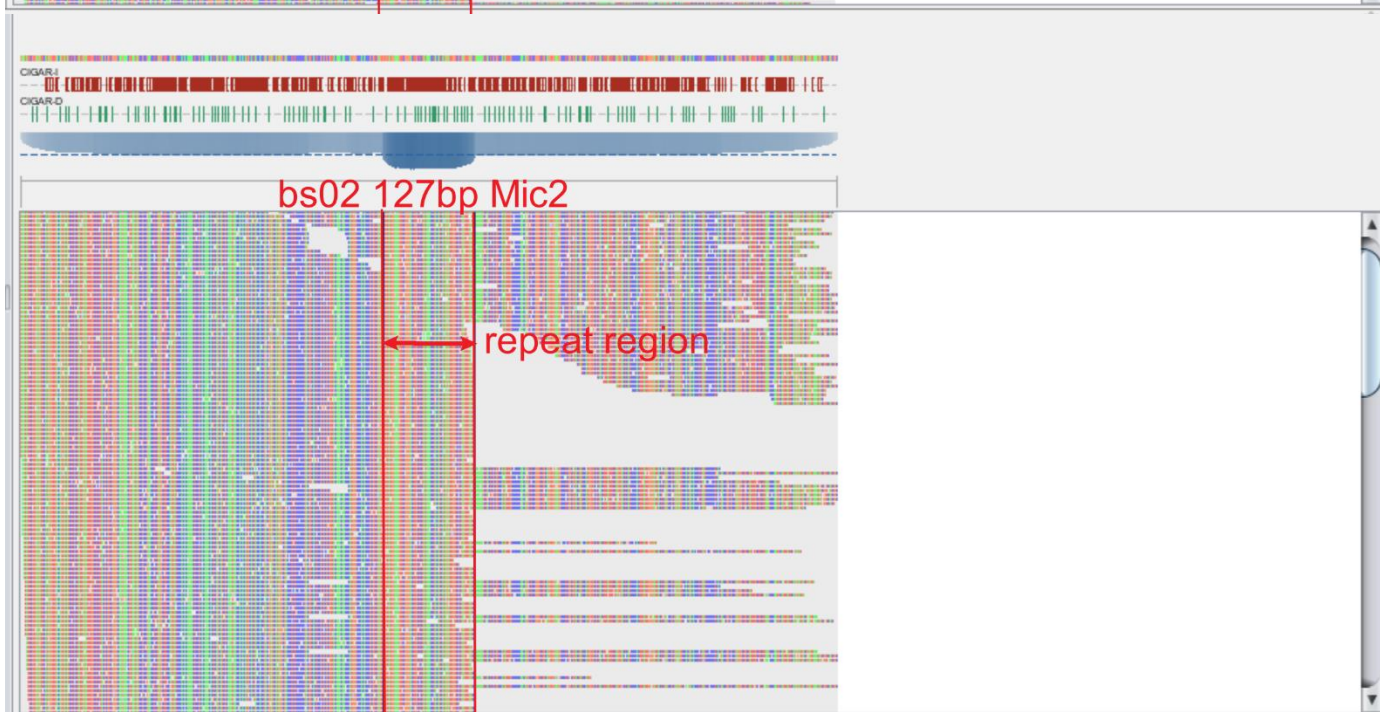



c

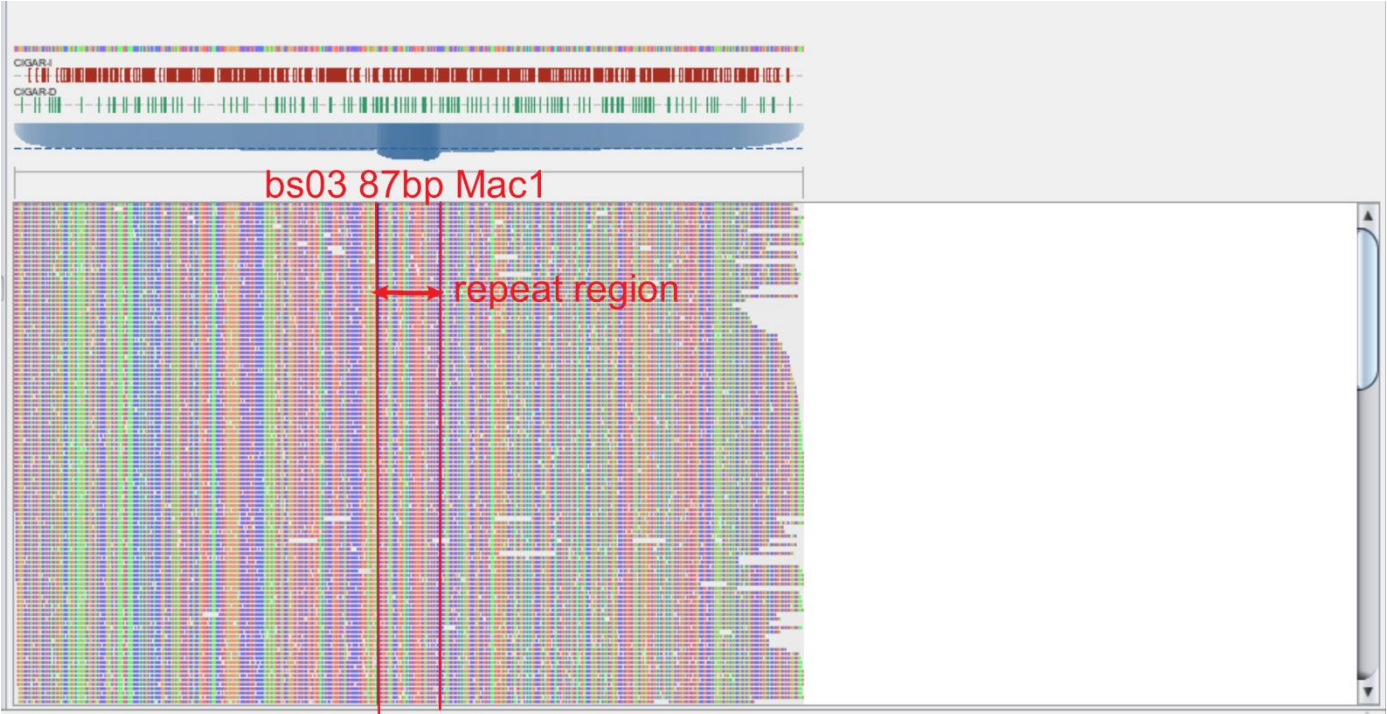





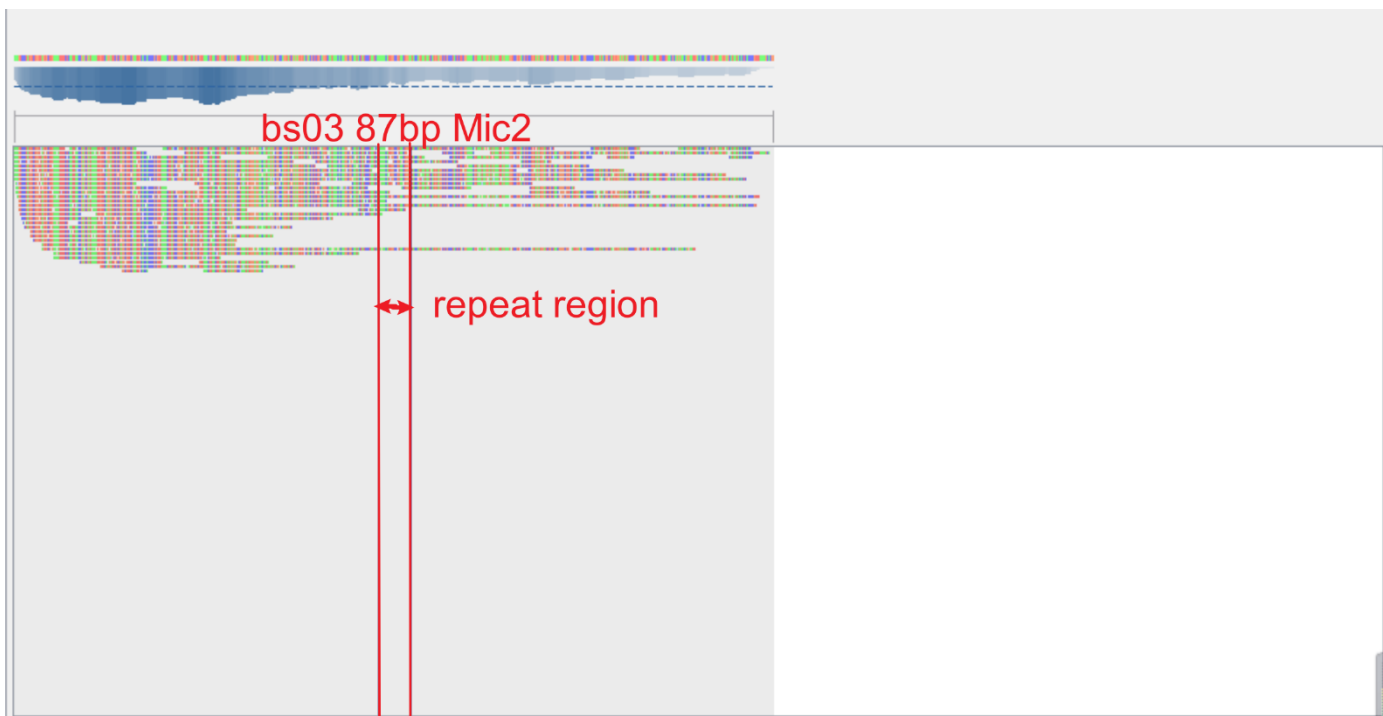

d

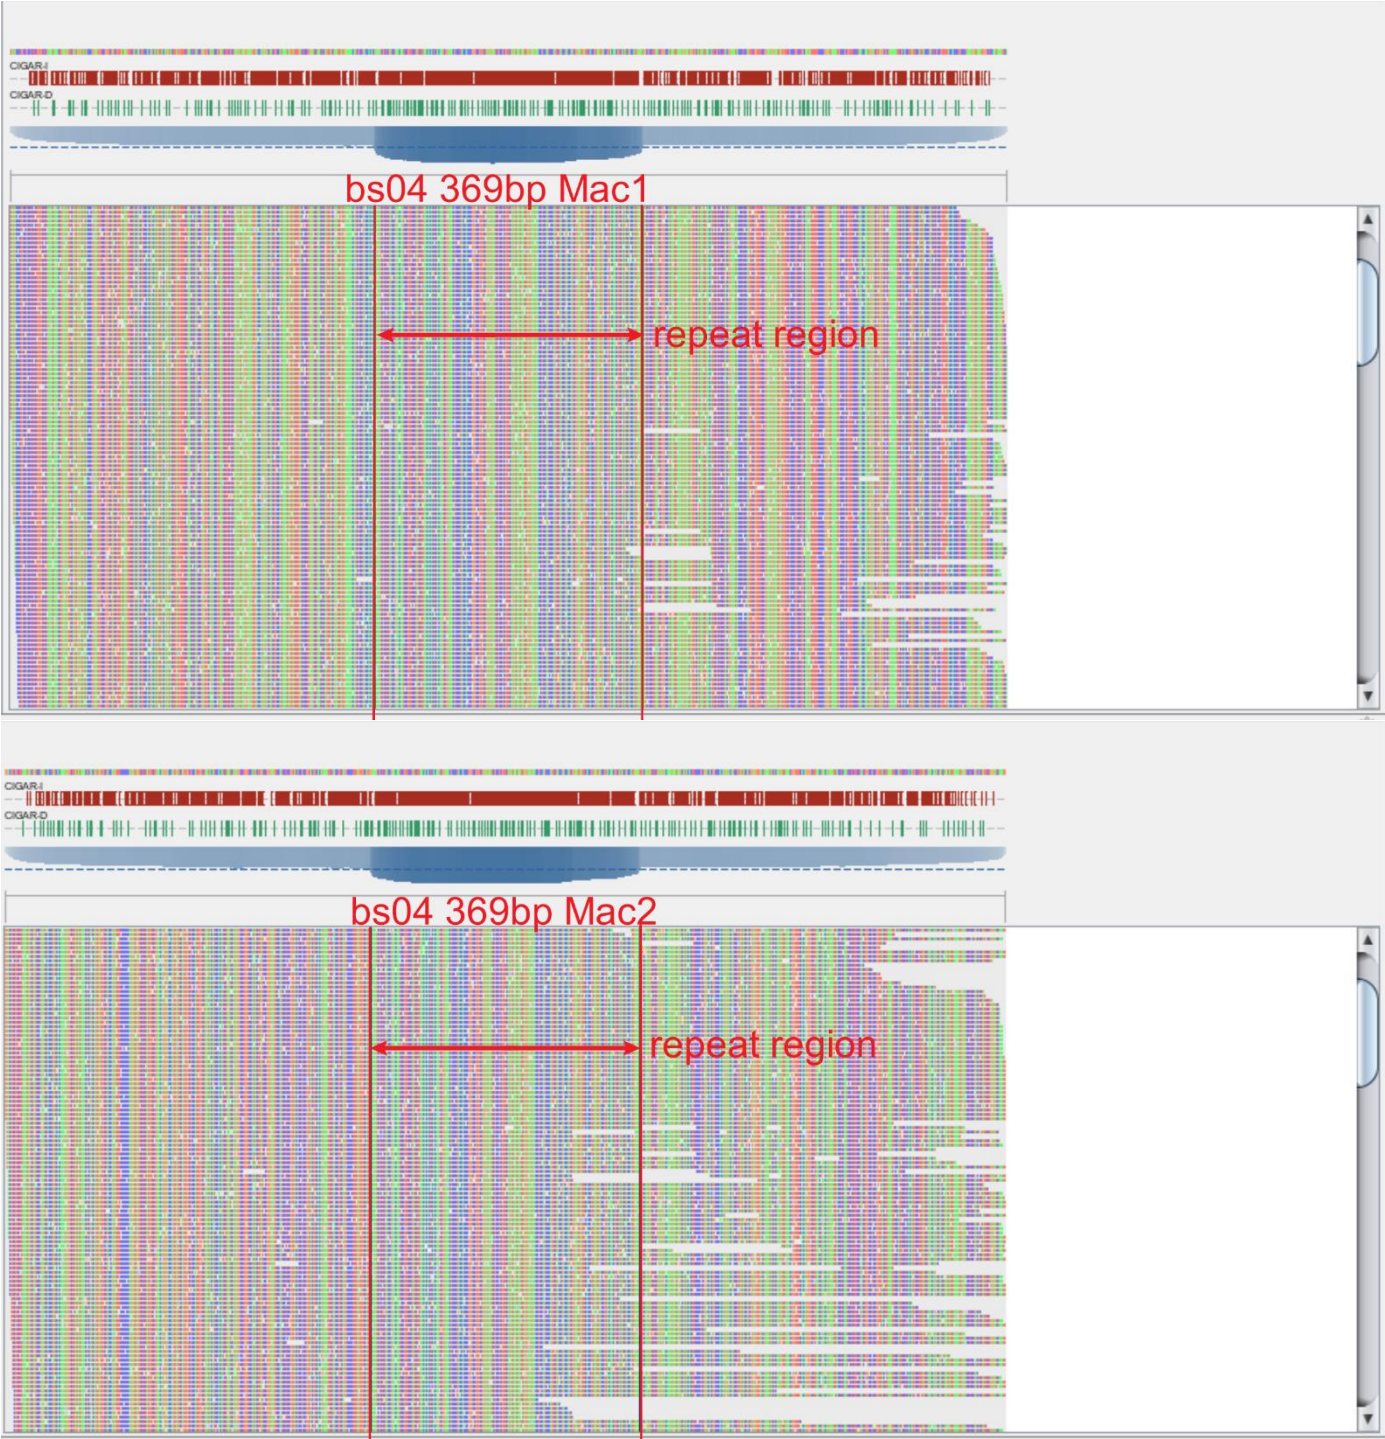



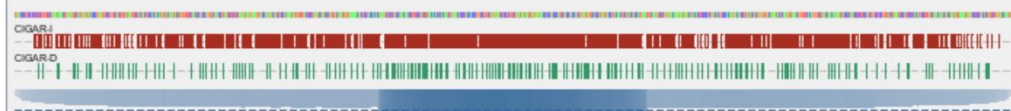

bs04 369bp Mic1

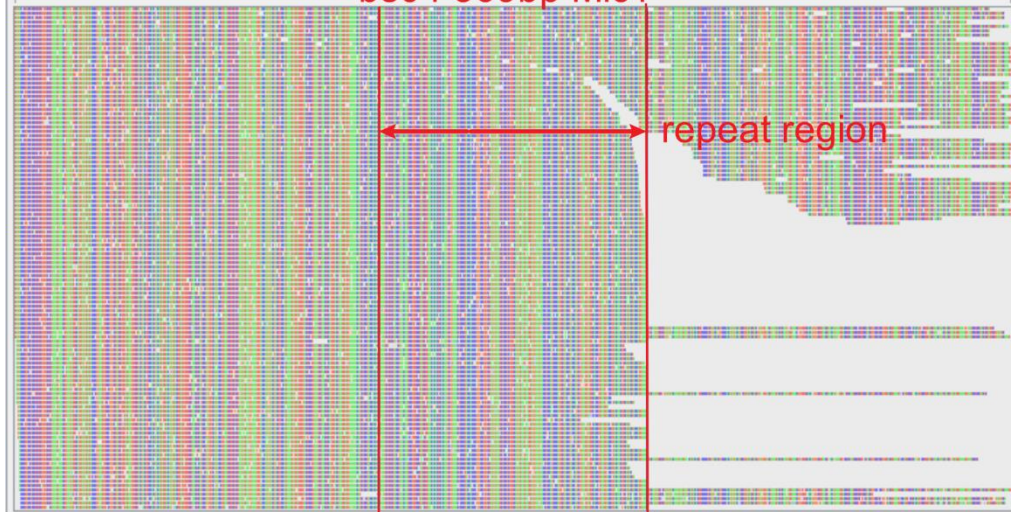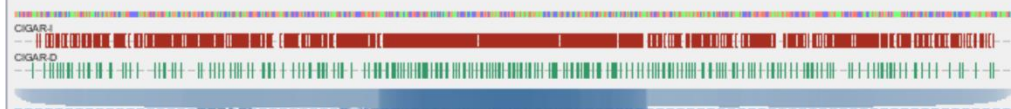

bs04 369bp Mic2

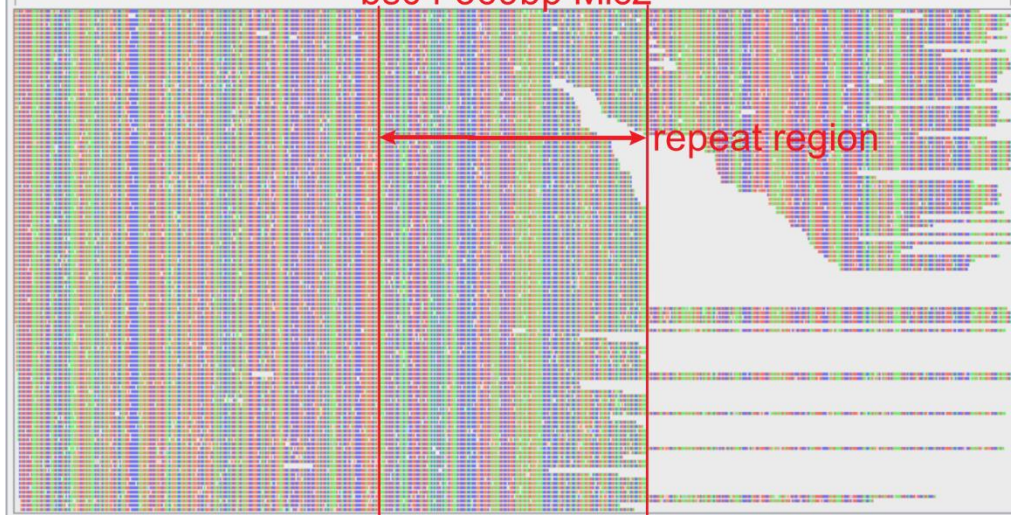

e

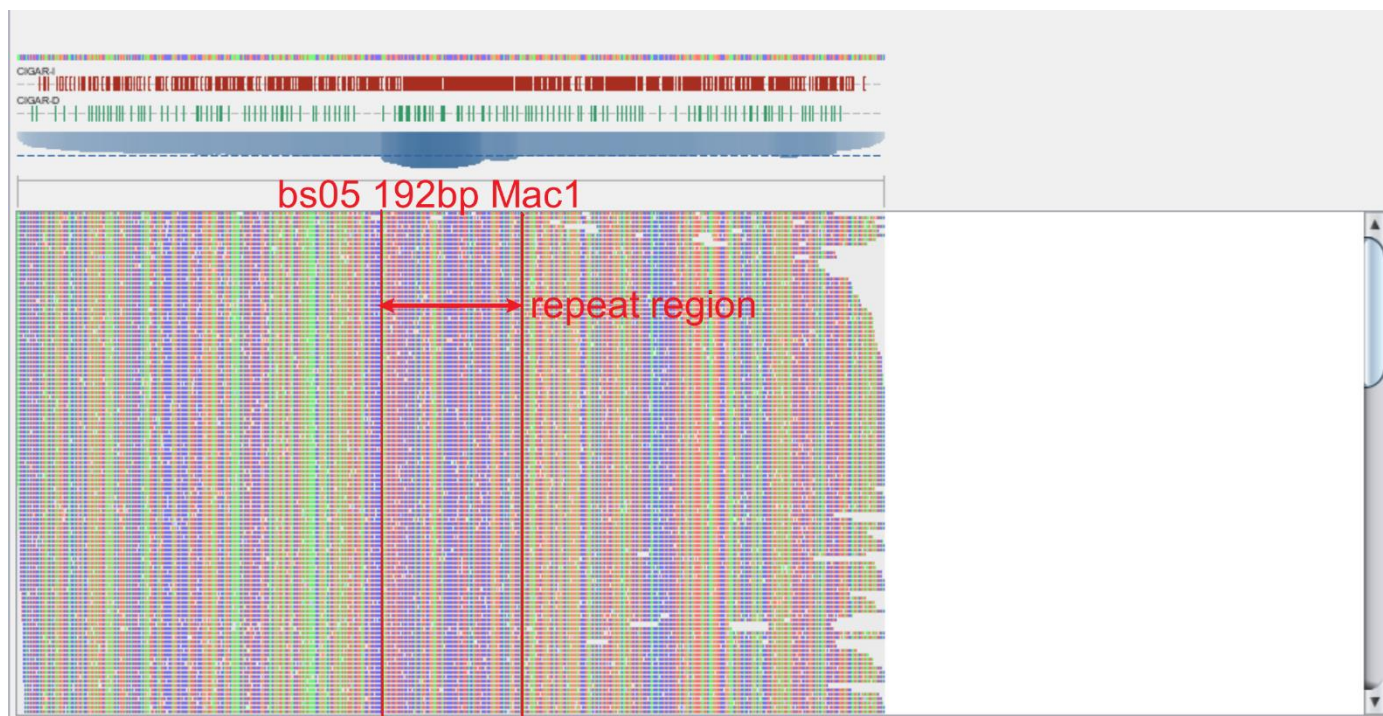





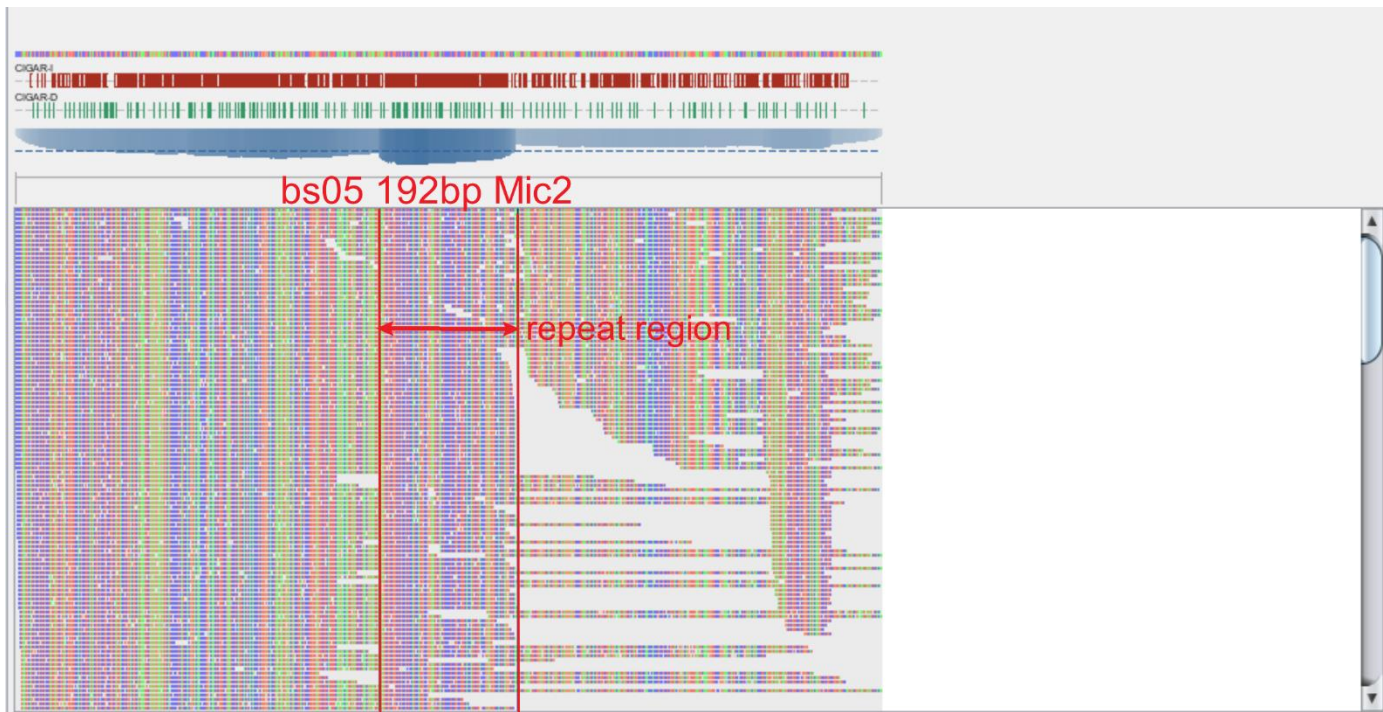



f

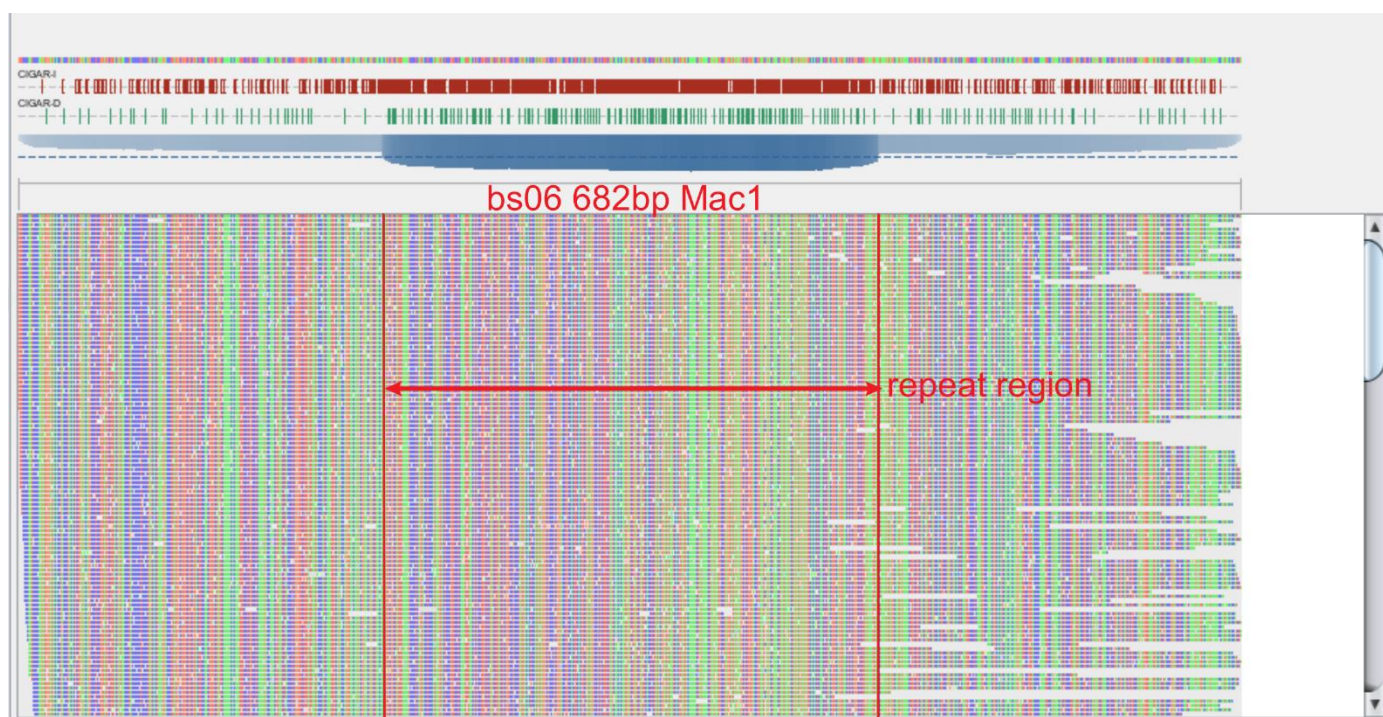



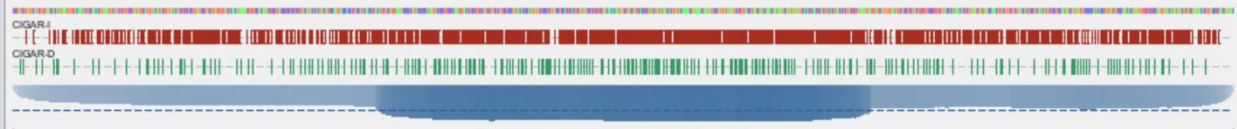

bs06 682bp Mac2

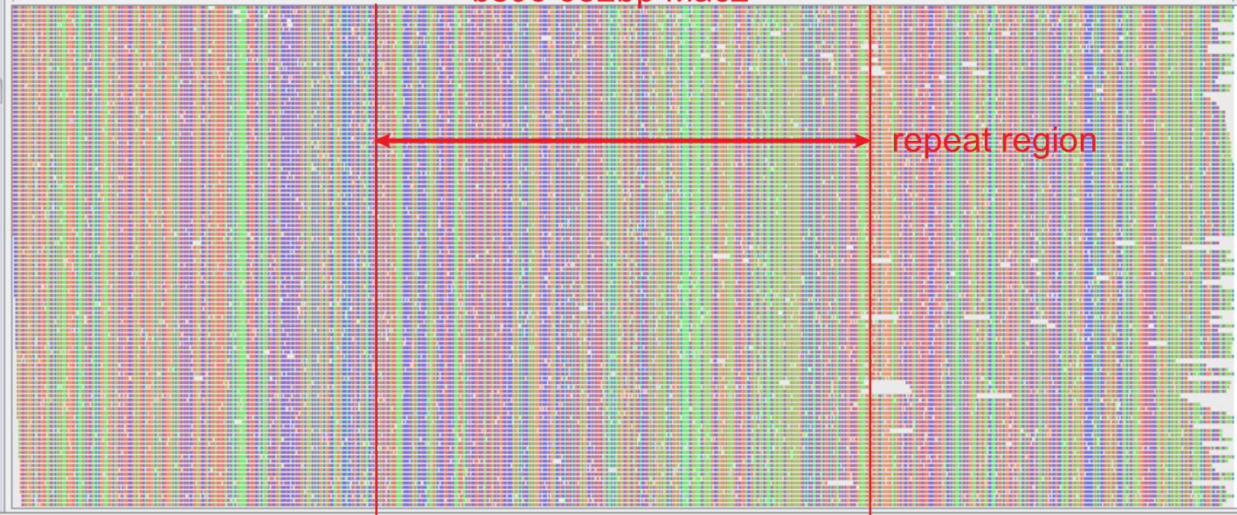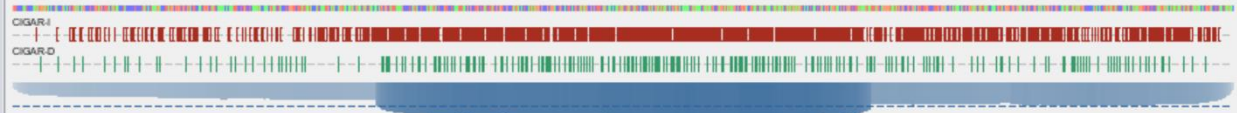

bs06 682bp Mic1

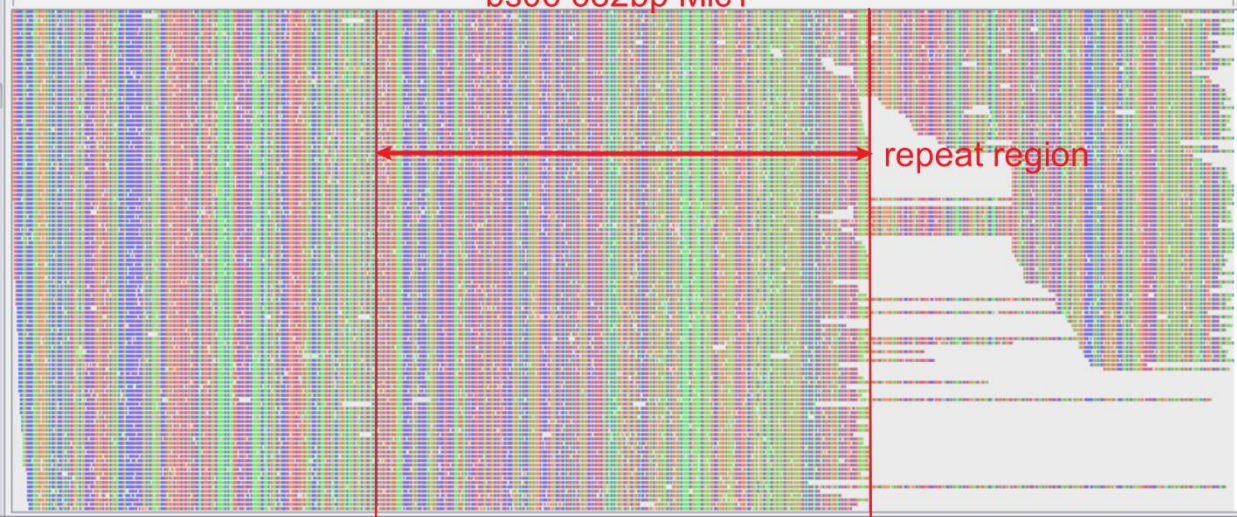



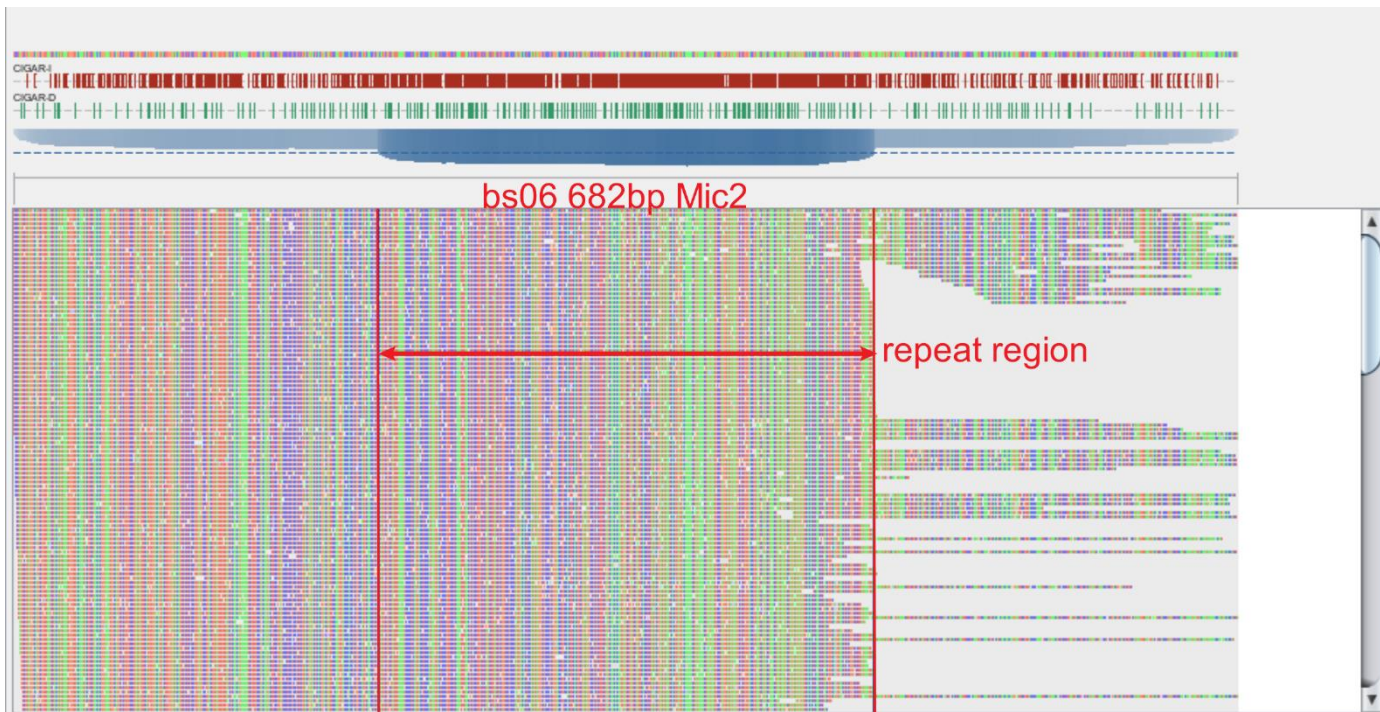

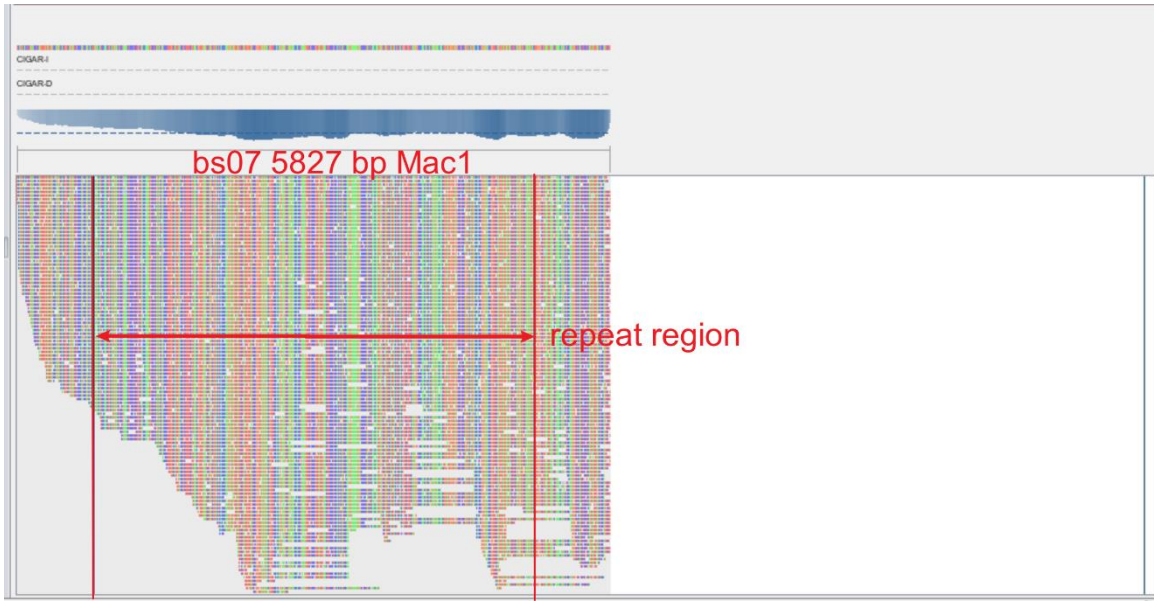

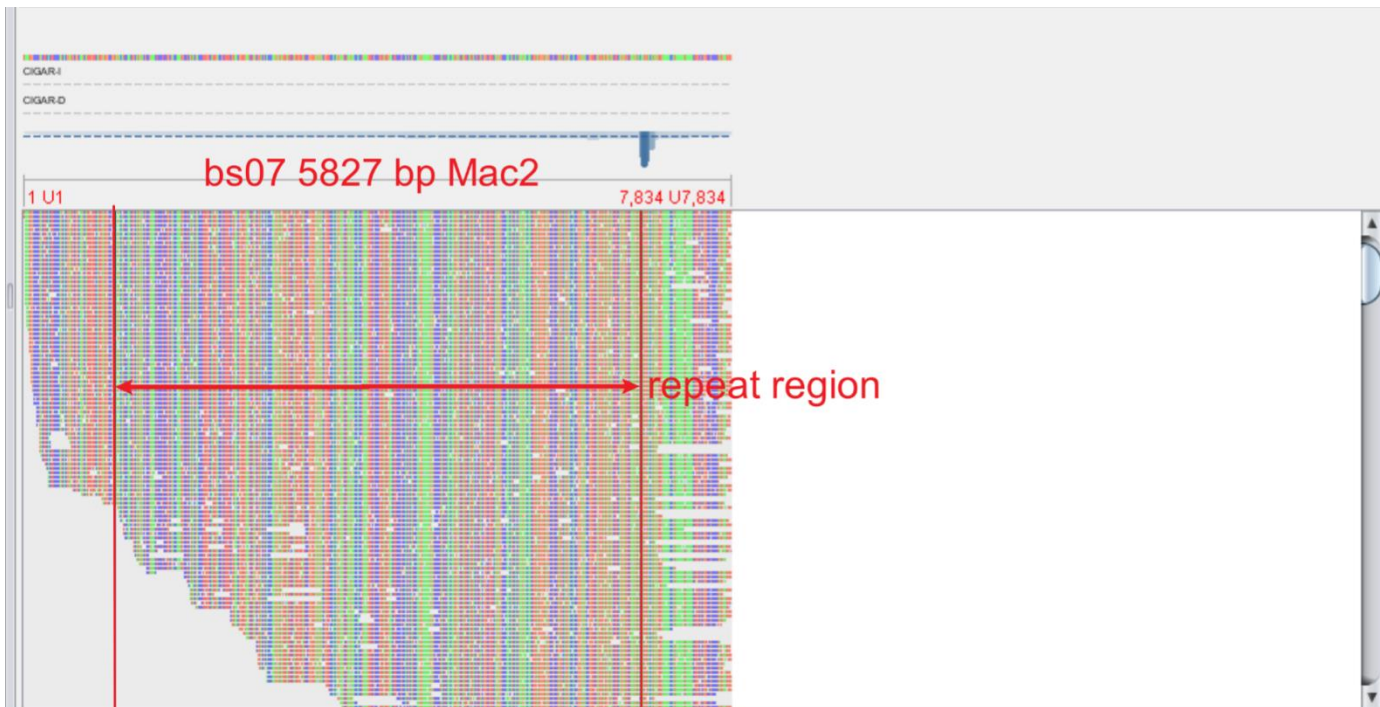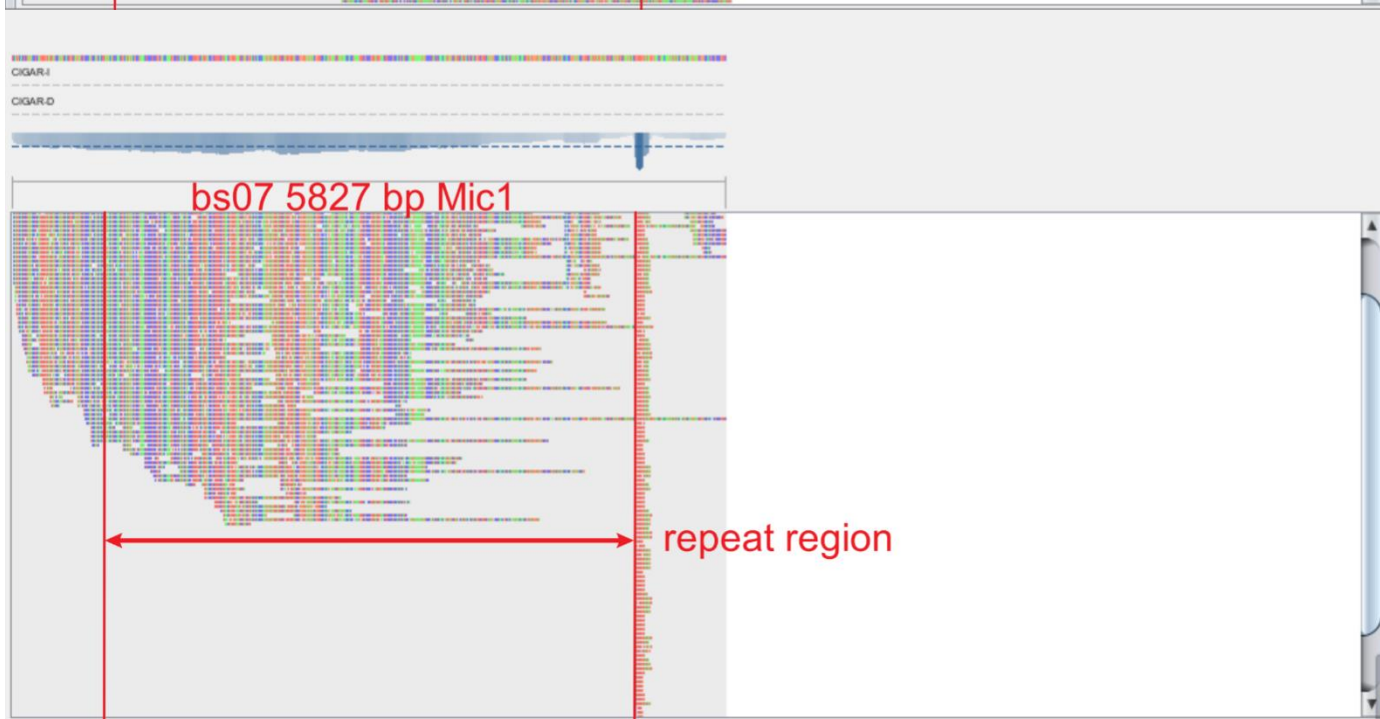

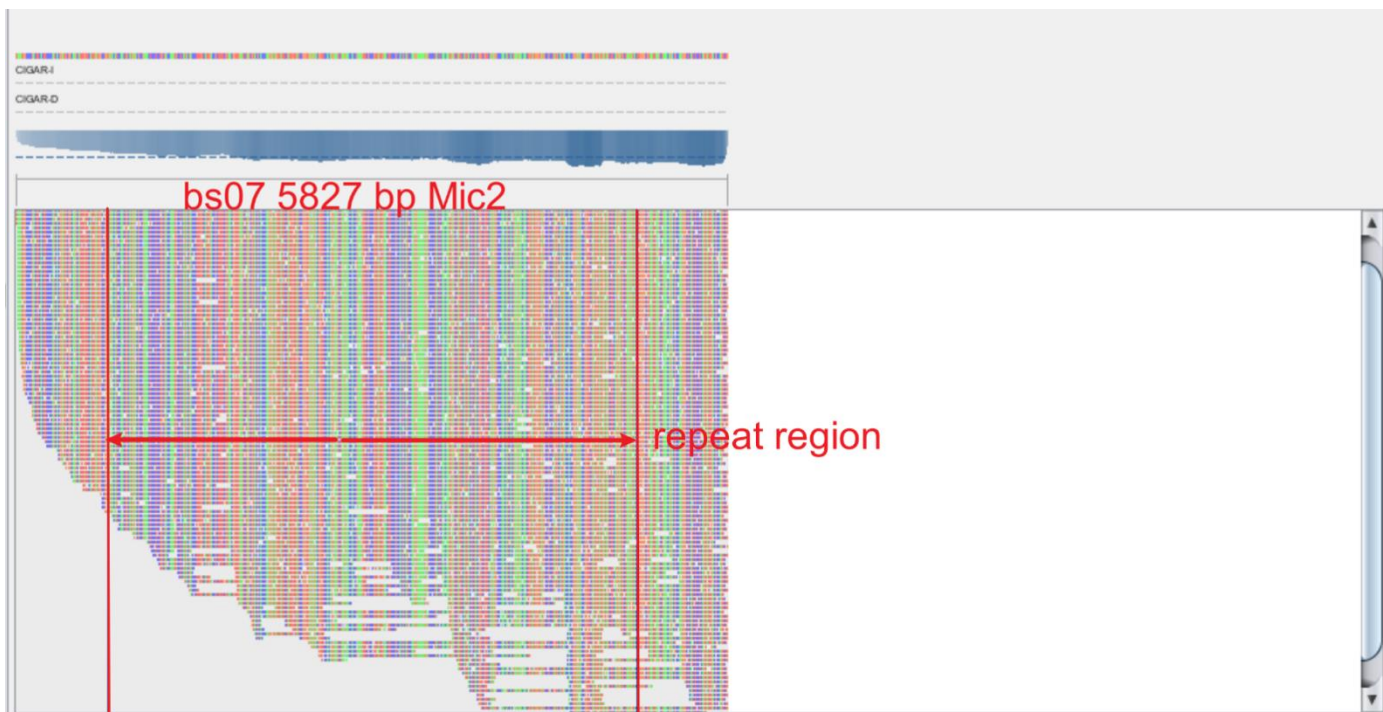



Figure S3. Mapping results of PacBio and Illumina reads to the MC1 and MC2 of *S. miltiorrhiza*. Panels a and b show the mapping results of PacBio reads to MC1 and MC2, respectively. Panels c and d show the mapping results of all Illumina reads to MC1 and MC2, respectively. The X- and Y-axis show the nucleotide position and corresponding coverage depth, respectively.

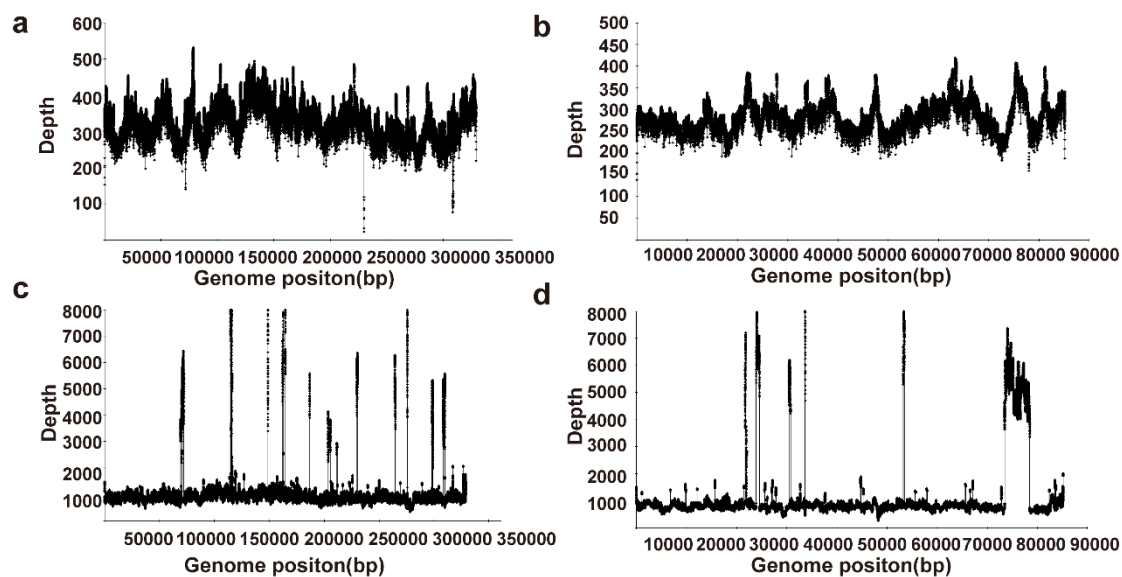

Figure S4. Comparison of the two assemblies of the mitogenome of *S. miltiorrhiza*. Comparison of the sequences of MC1 (A), MC2 (B), and NC\_023209.1. The X-axis shows the nucleotide sequence of MC1, and the Y-axis presents the nucleotide sequence of NC\_023209.1. The largest collinear block between them was 66,778 bp in length and is highlighted with a red circle.

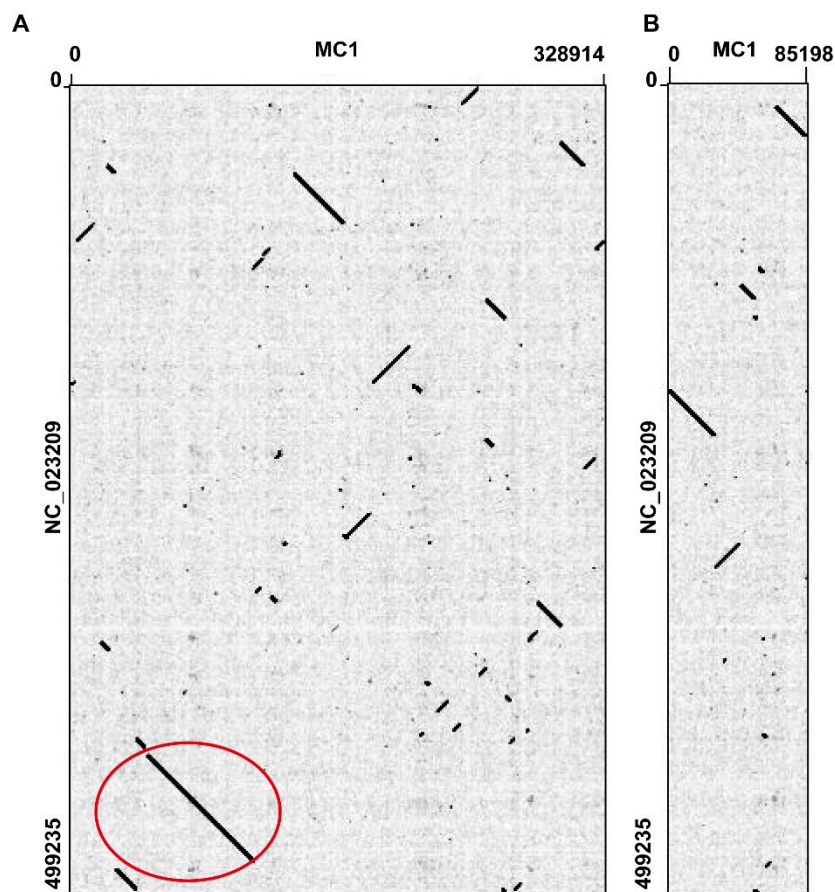

Figure S5. Mapping results of PacBio long reads to the mitogenome of *S. miltiorrhiza* in GenBank (NC\_023209.1). The X-axis shows the nucleotide position, and the Y-axis reveals the corresponding coverage depth. Three large regions not supported by the long reads in this study are highlighted with red squares.

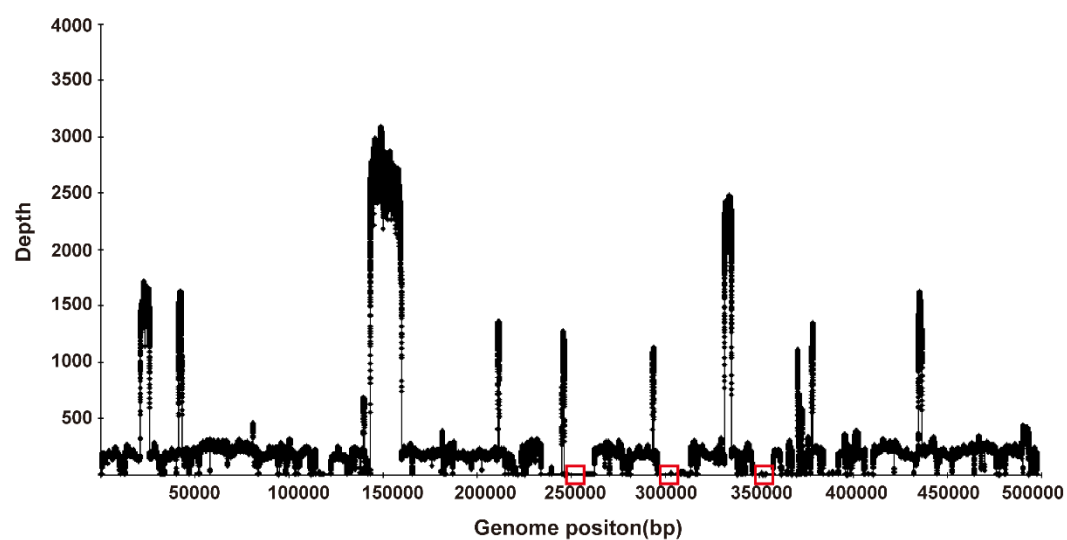

Figure S6. Alignments of long PacBio reads to the Mac and Mic resulted from nine pairs of HSPs (sami-r01 to sami-r09). The nine HSPs were identified using BLASTn with the e-value = 1e-6. The alignment of two HSPs generated a DBS, similar to the ones observed in the unitig graph (Fig. 1). In the presence of homologous recombination, the DBSs formed by the alignment of HSPs and their flanking sequences will also have four conformations, similar to those shown in Fig. 1B. We constructed the sequences corresponding to the four conformations of each DBS for each HSP. We then mapped the long PacBio reads to these sequences. The results are shown in panels a - i for sami-r01 to sami-r09, respectively. We named the conformations having the most supporting reads as Mac1 and Mac2. The reference sequences of Mac1 and Mac2 are reverse-complementary to each other. The alternative conformations were named as Mic1 and Mic2. The figure in each panel can be divided into the top and bottom parts. The top part shows a bird's eye view, whereas the bottom part reveals a base-level view. At the bottom part of the figure, the HSP ID, length of HSP, and conformation name are shown. The boundaries of HSPs are indicated with red vertical lines. The HSPs are shown as the red line having arrows at each end. They were labeled as “repeat region”.

a

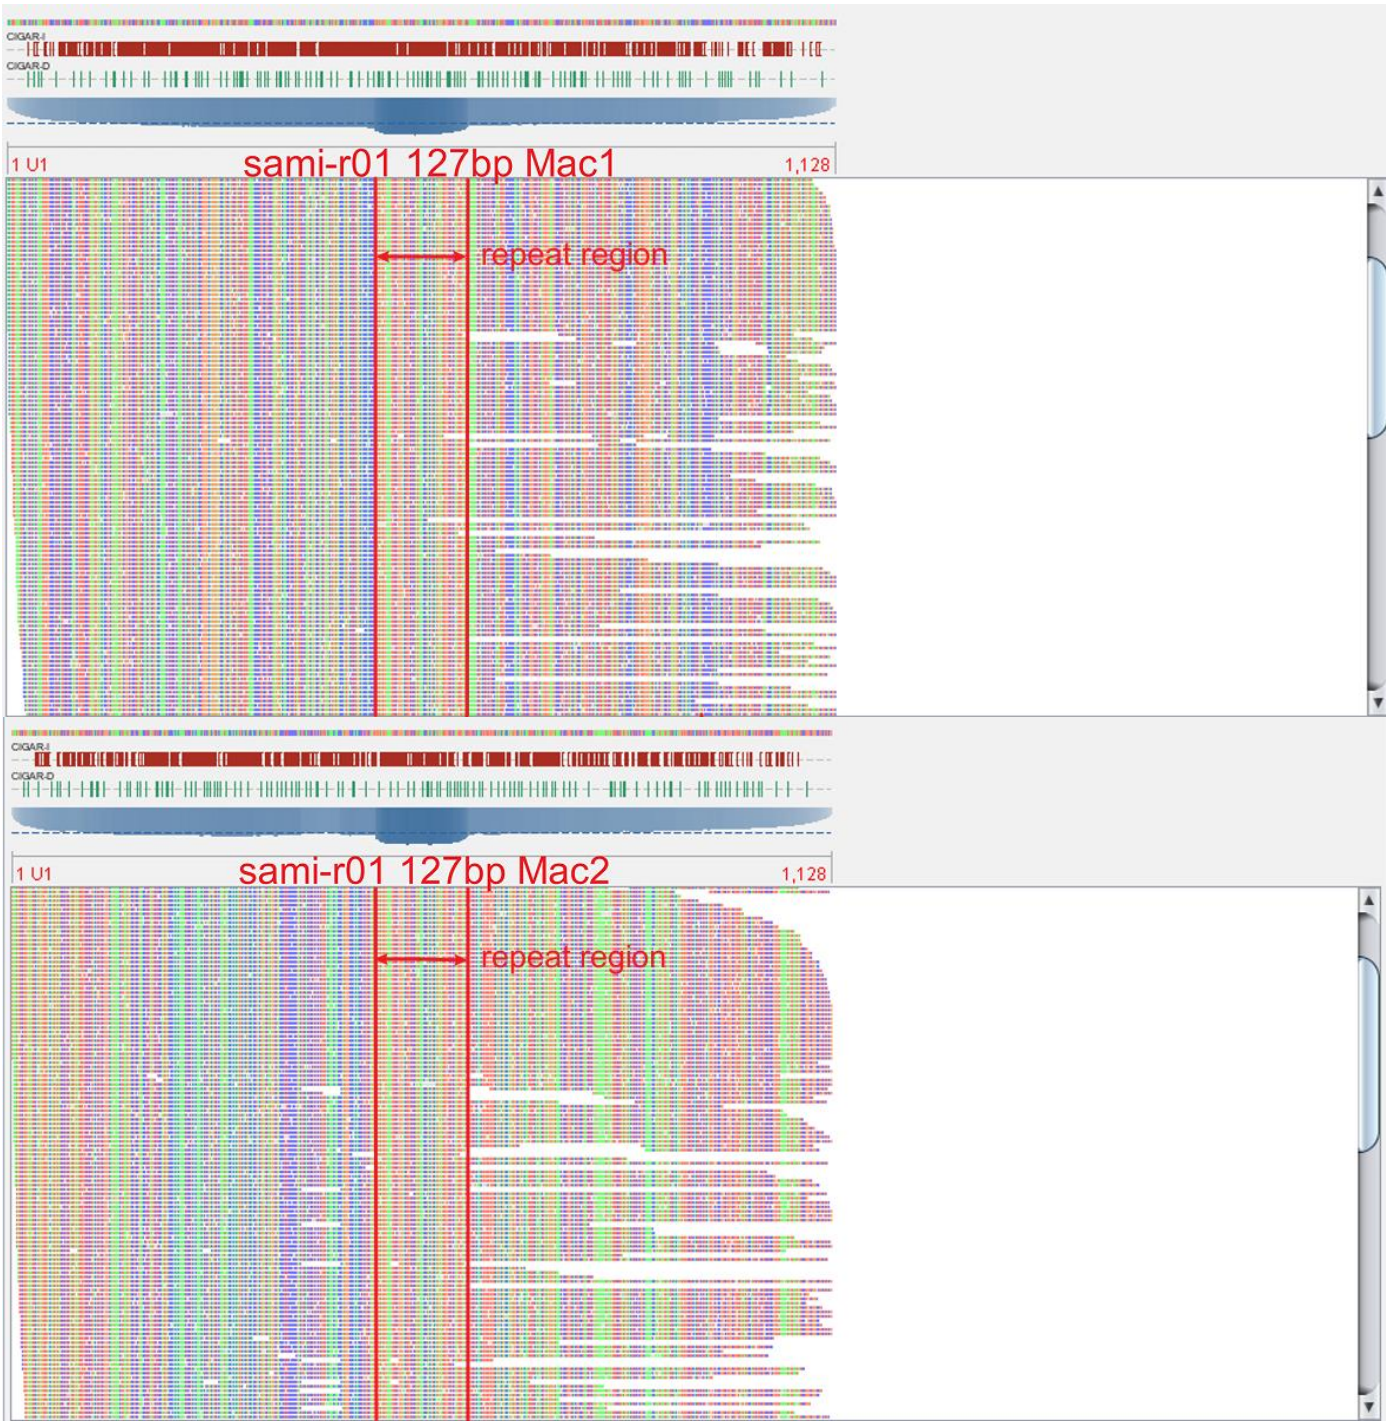



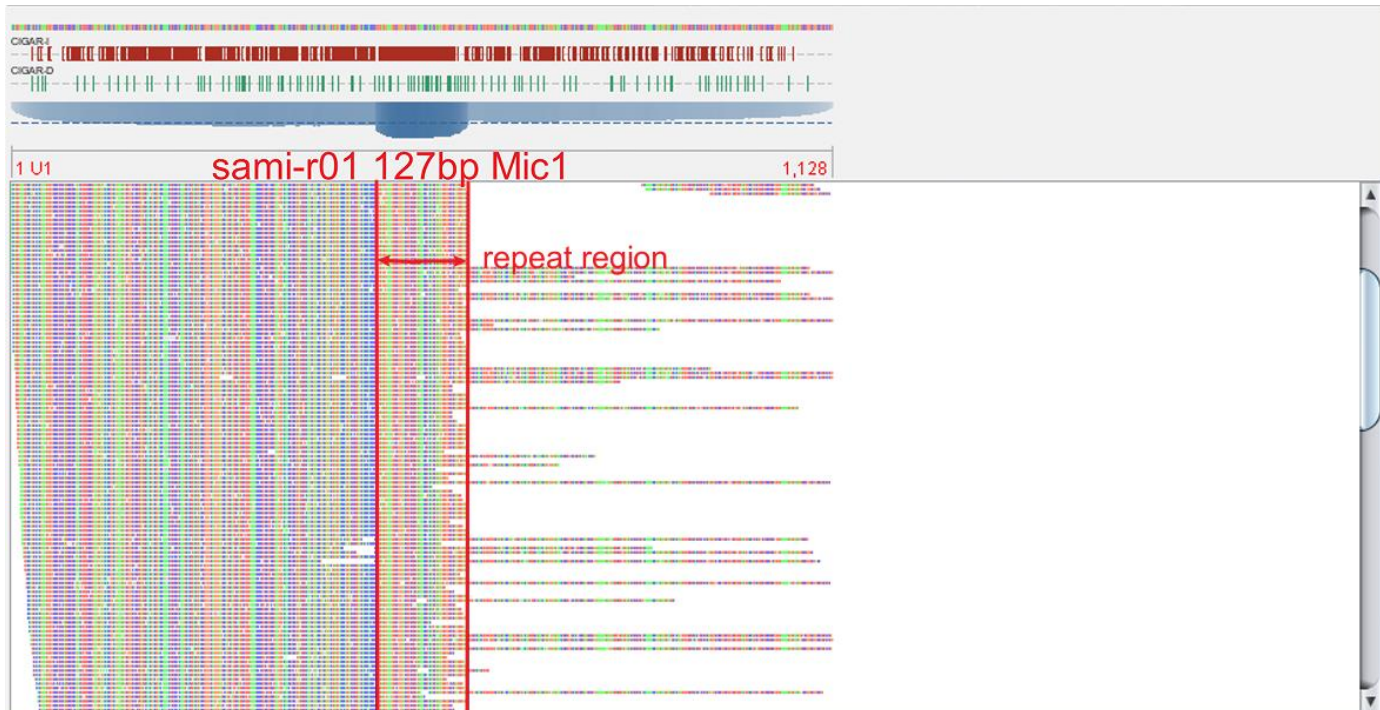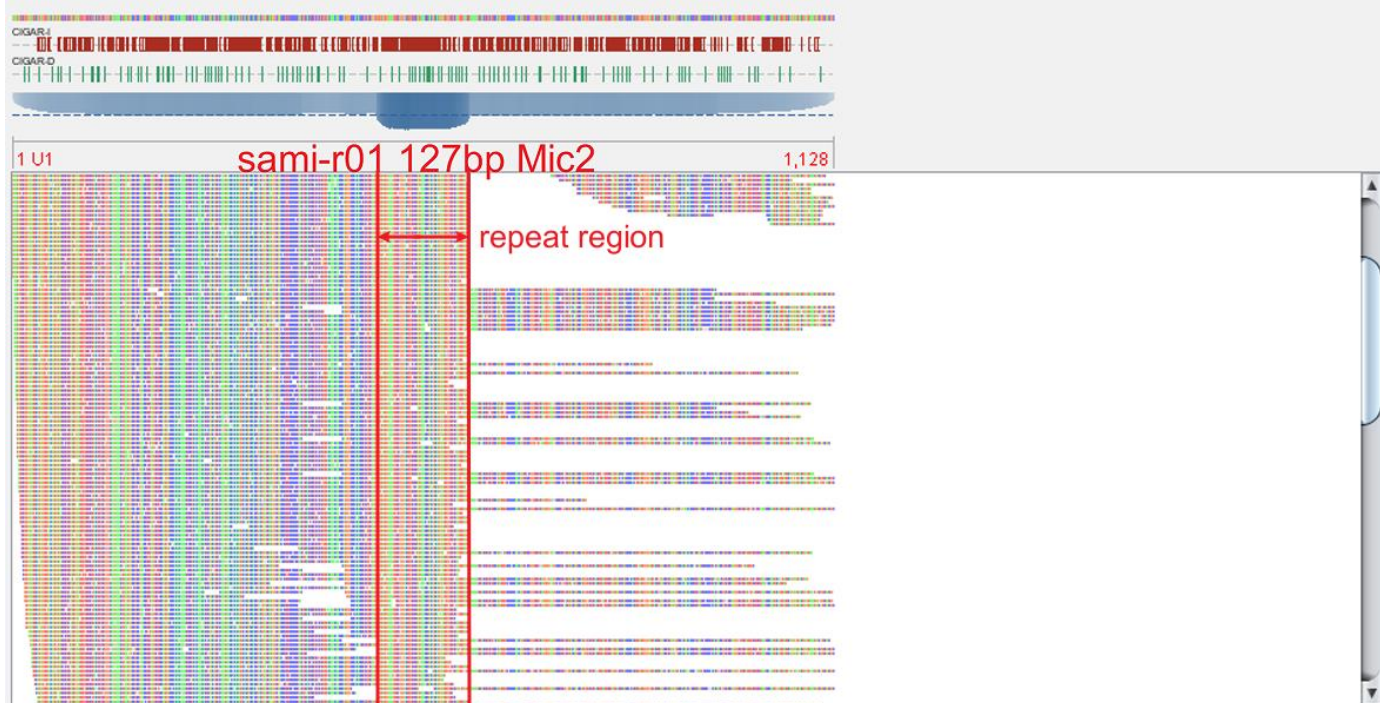



b

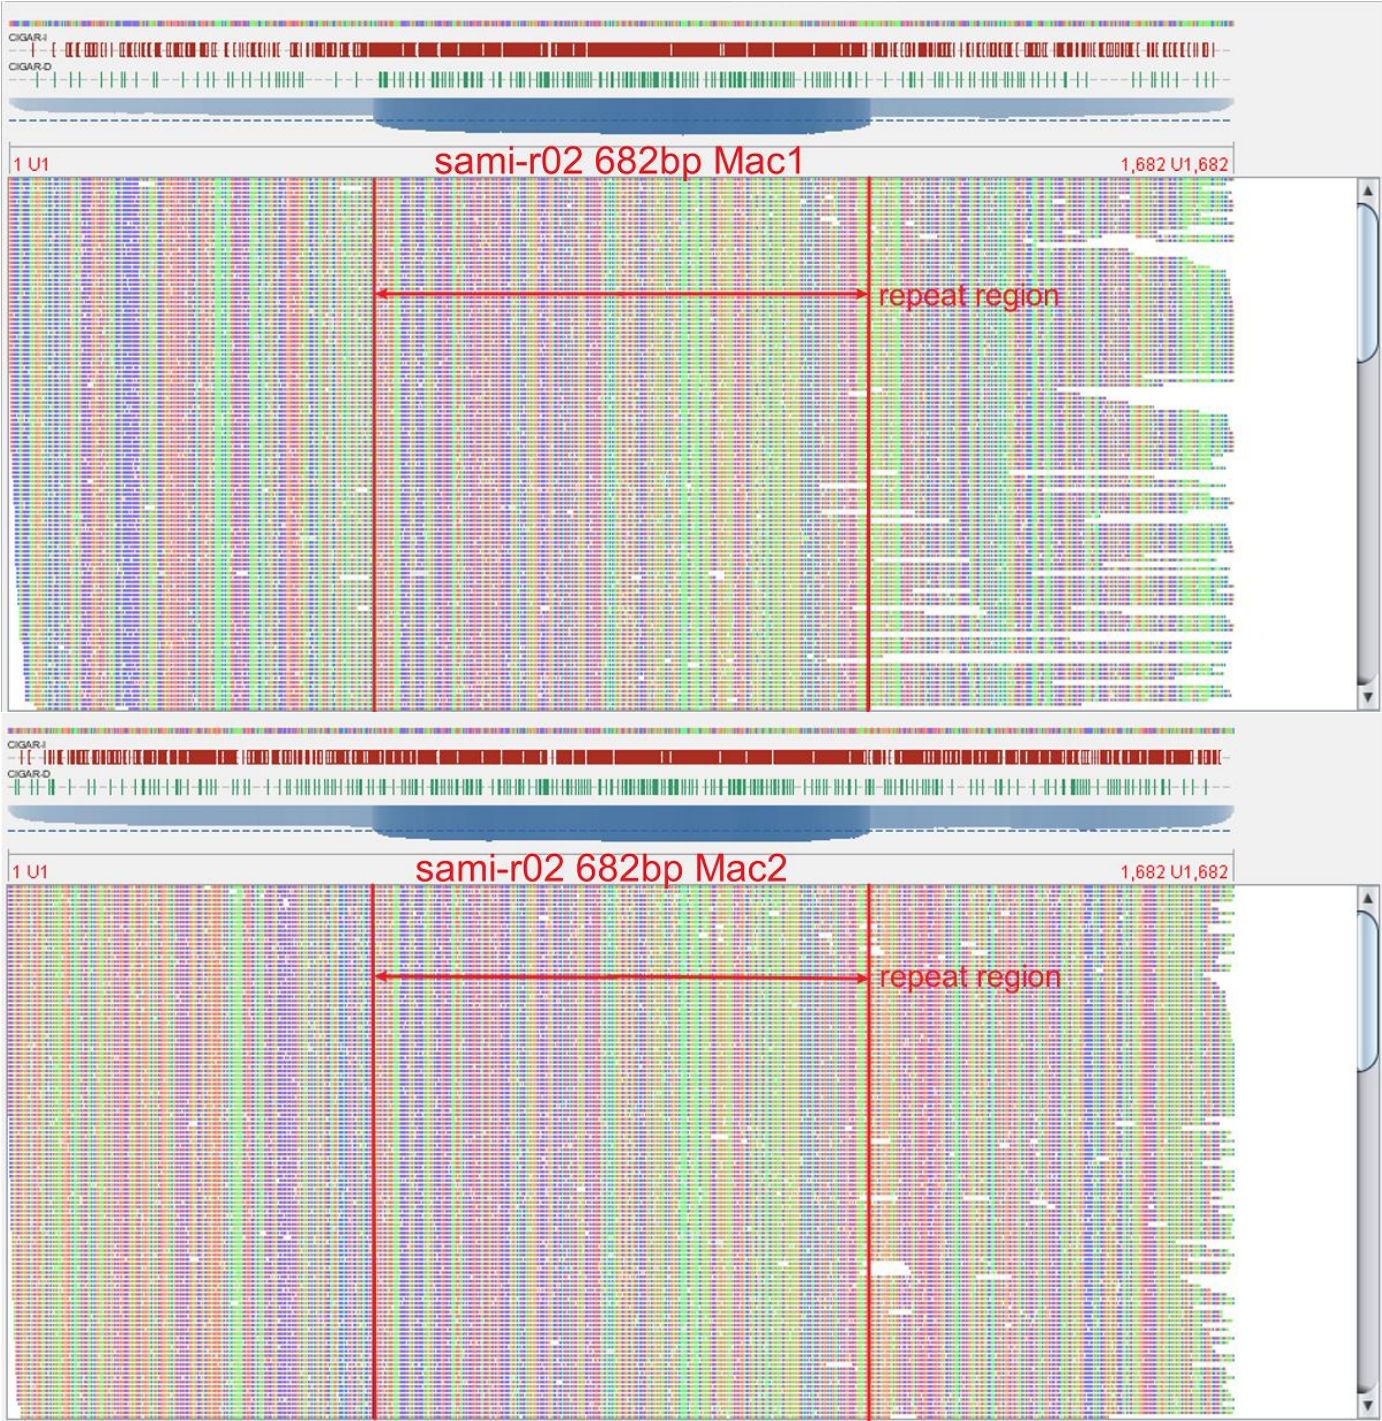



CIGAR:J

CIGAR:D

1 U1

sami-r02 682bp Mic1

1,682 U1,682

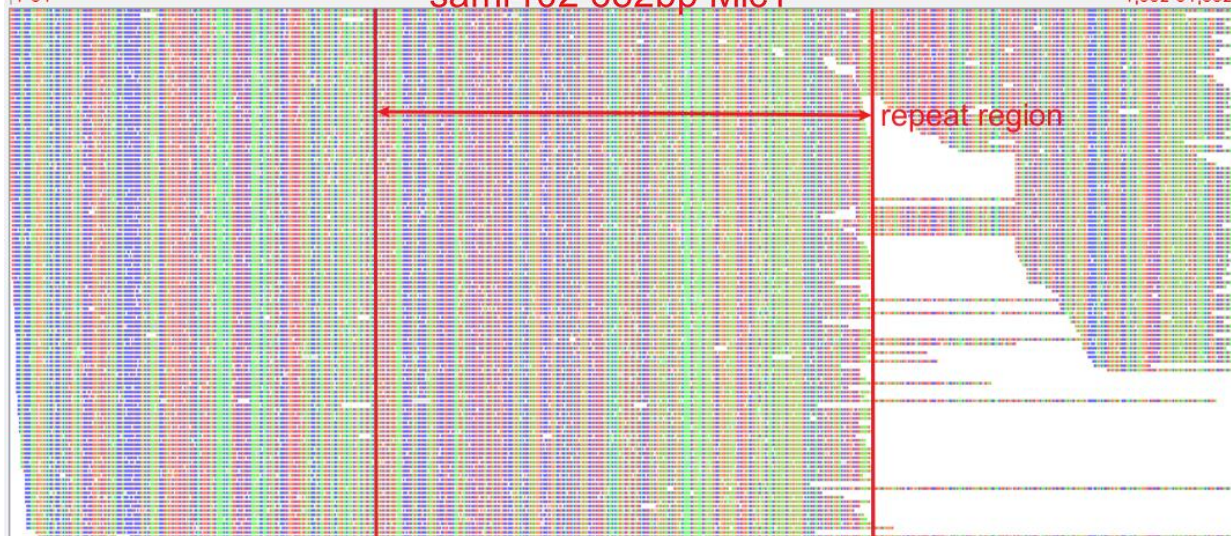

CIGAR:J

CIGAR:D

1 U1

sami-r02 682bp Mic2

1,682 U1,682

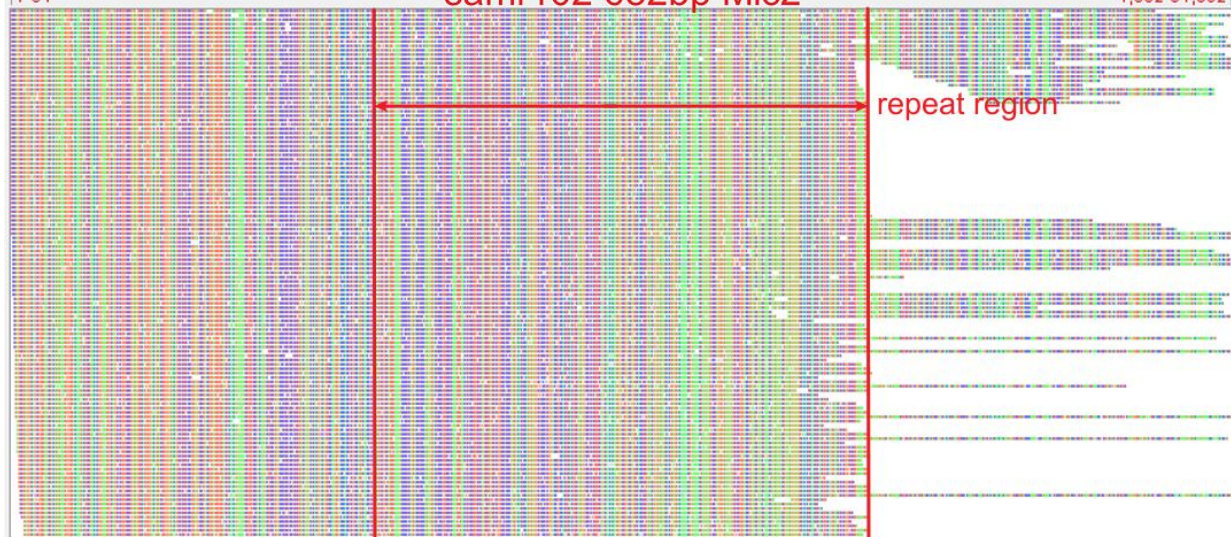



c

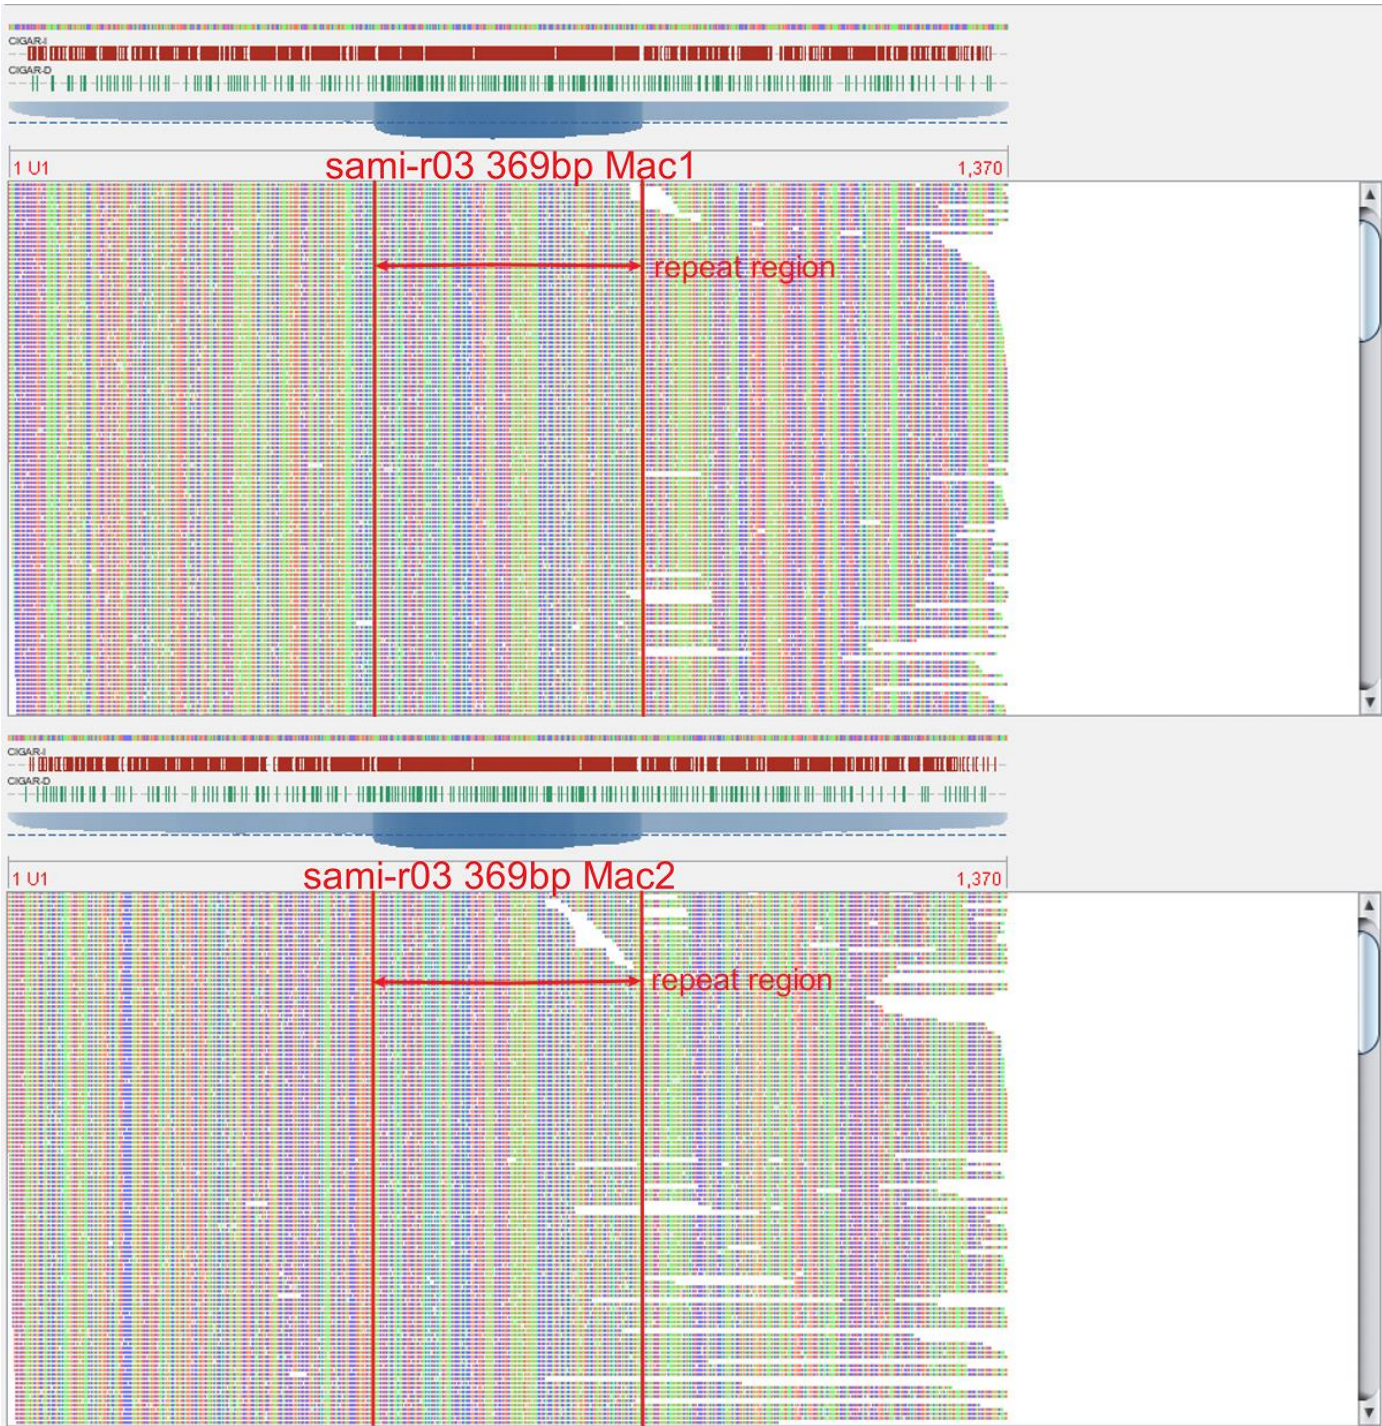



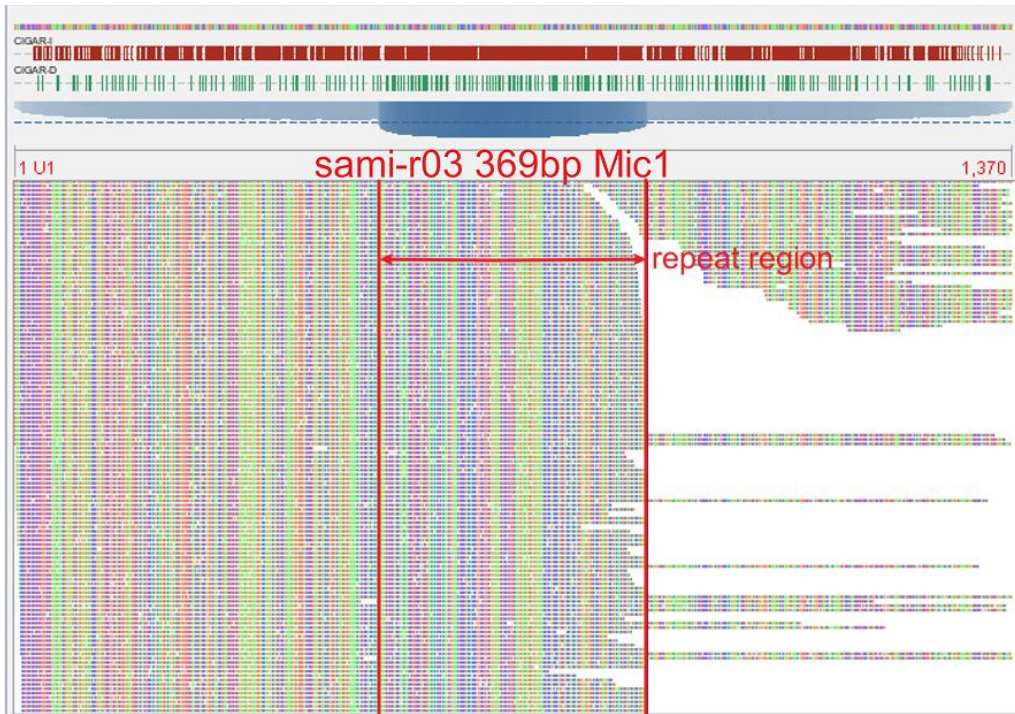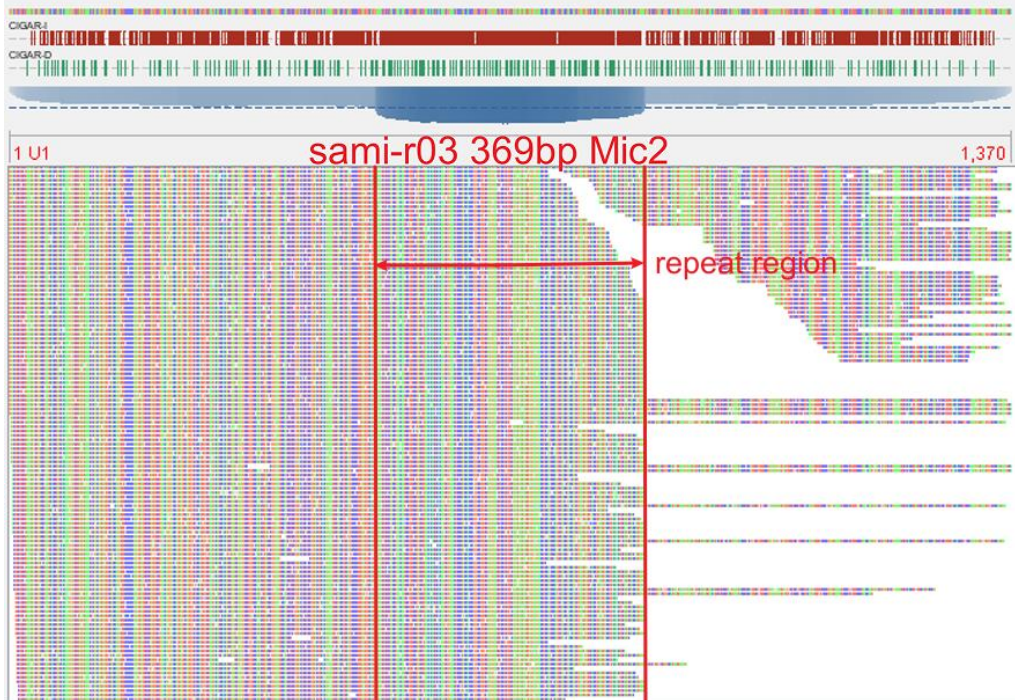



d

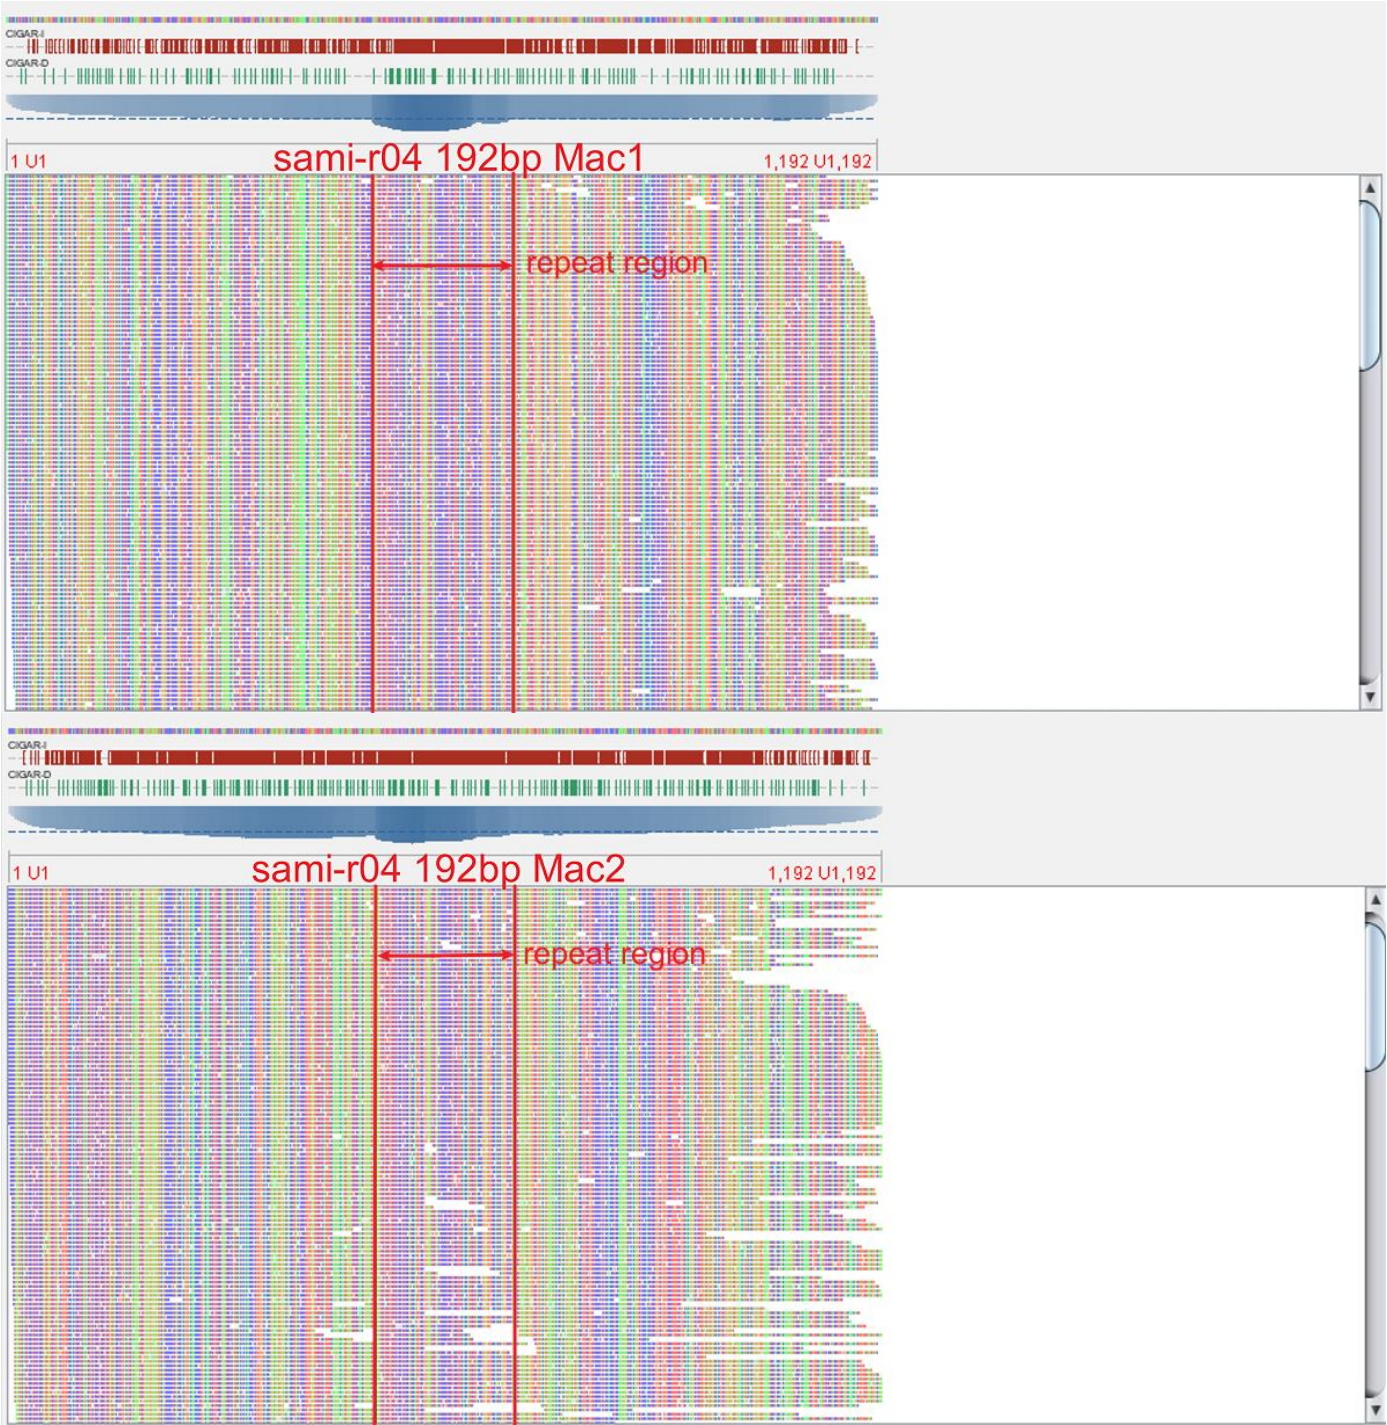







e

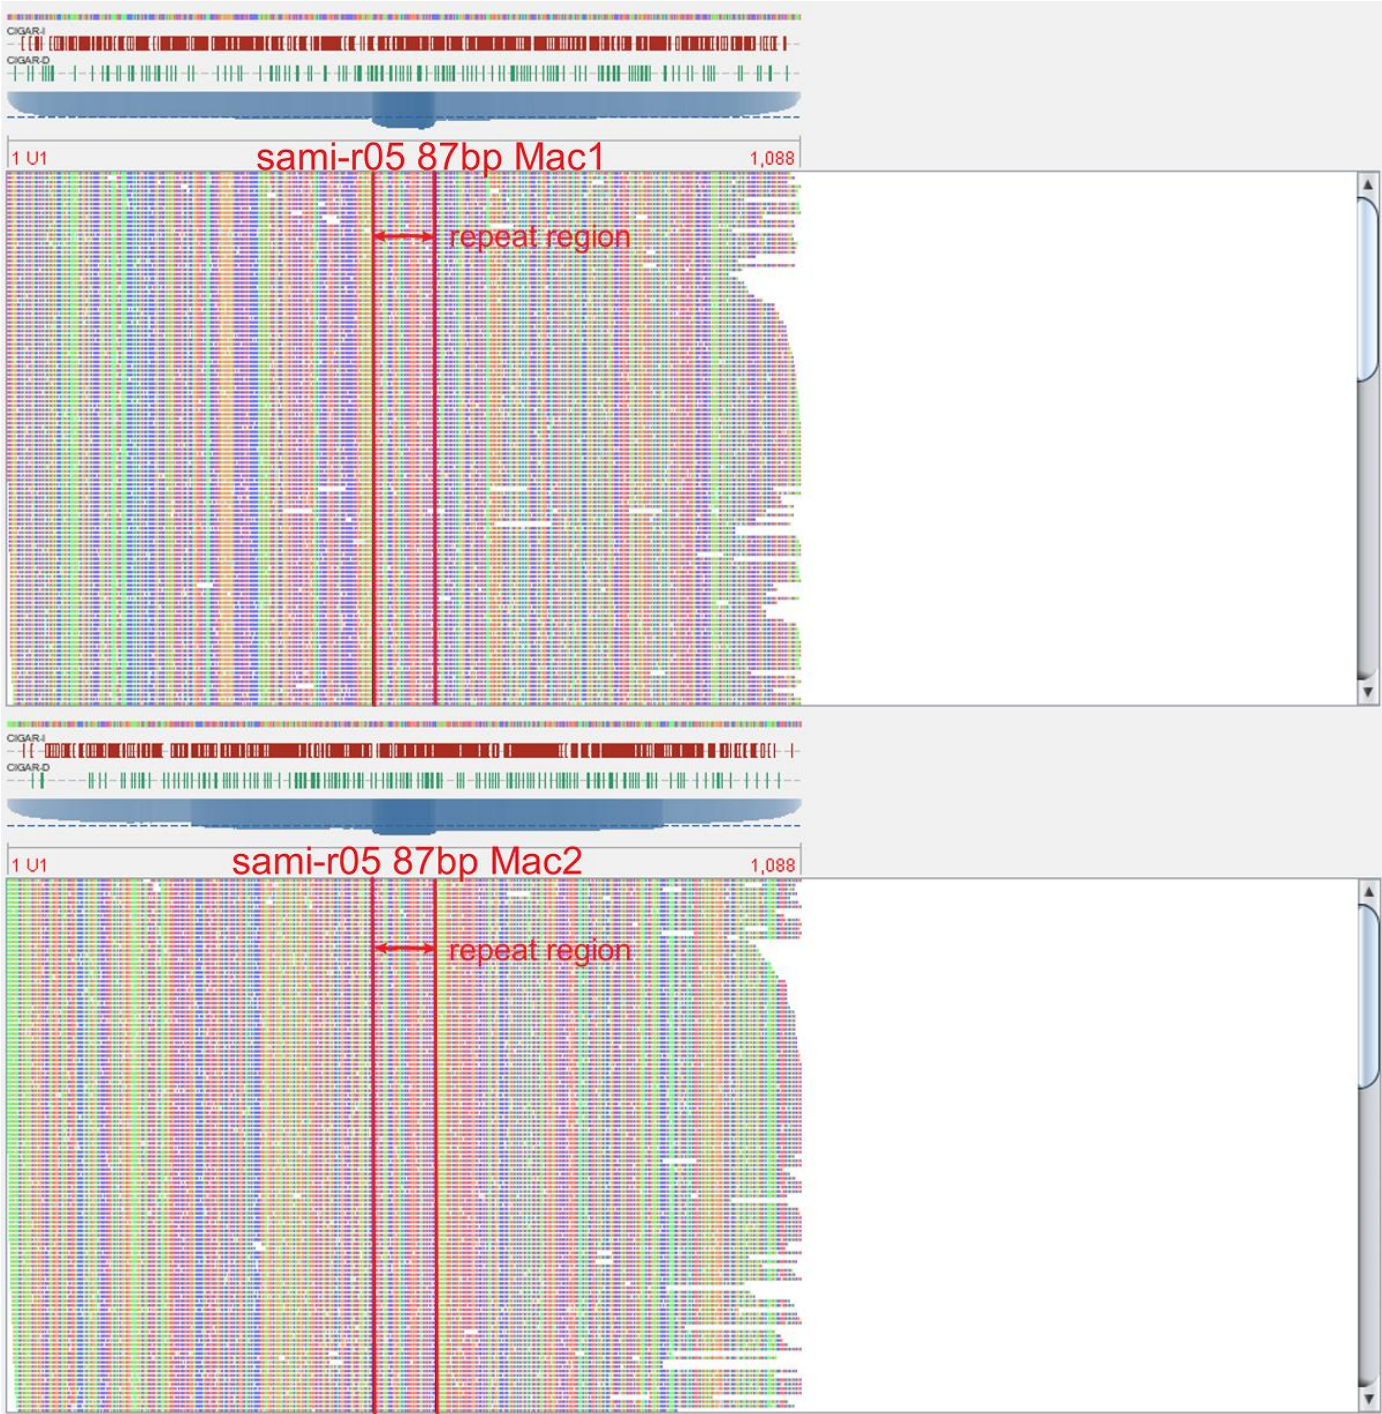



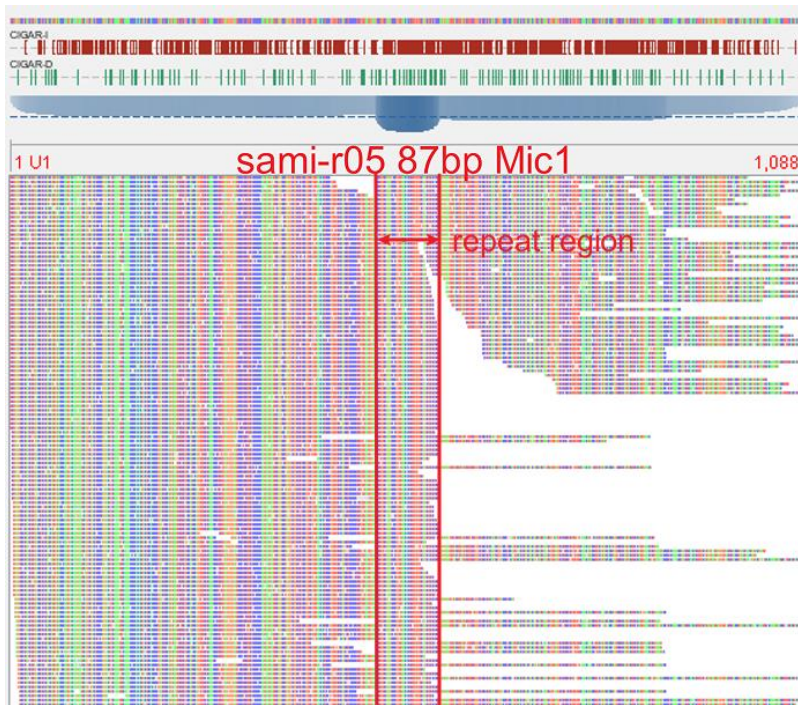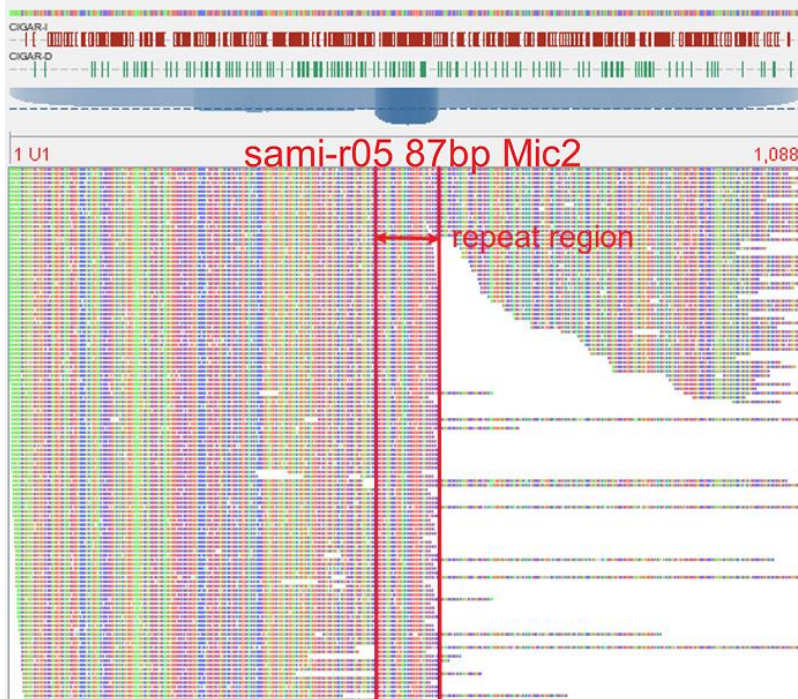



f

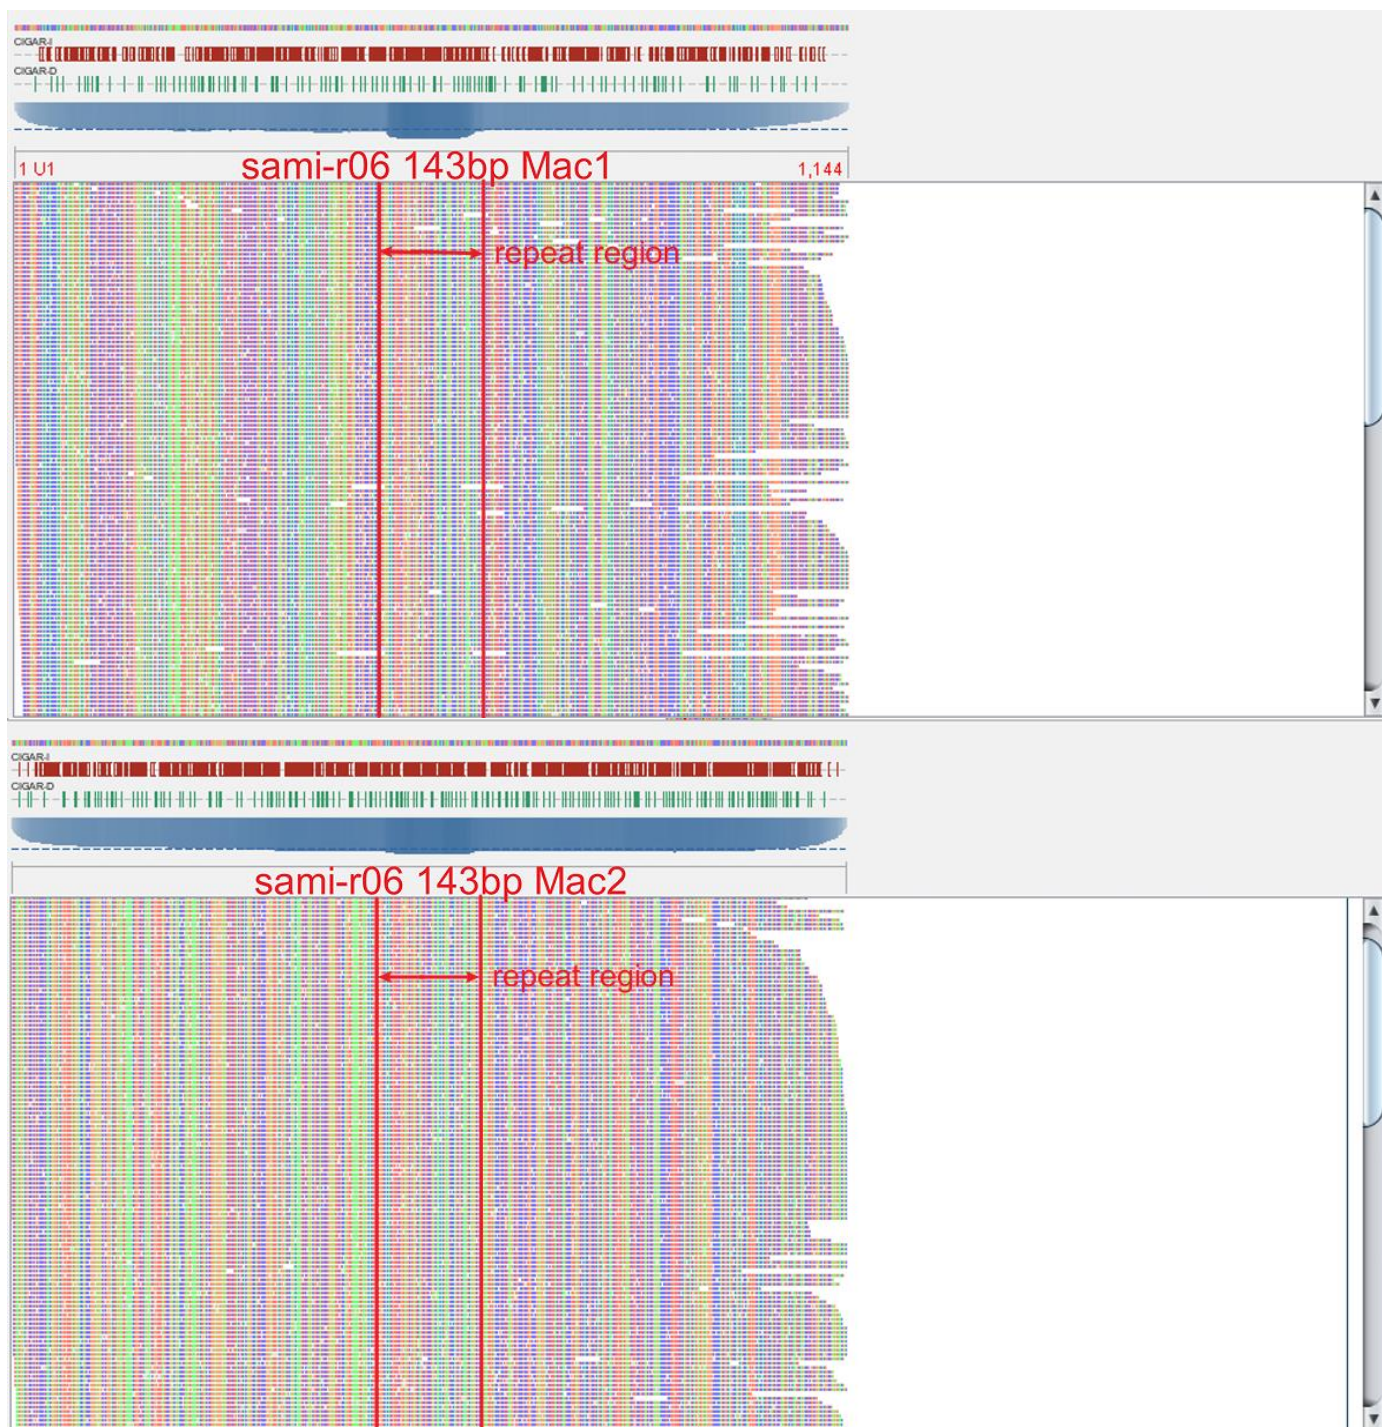



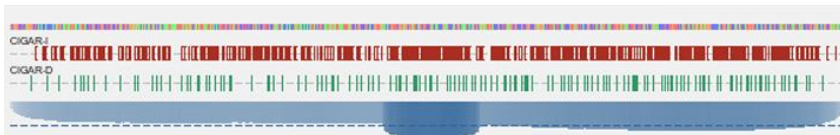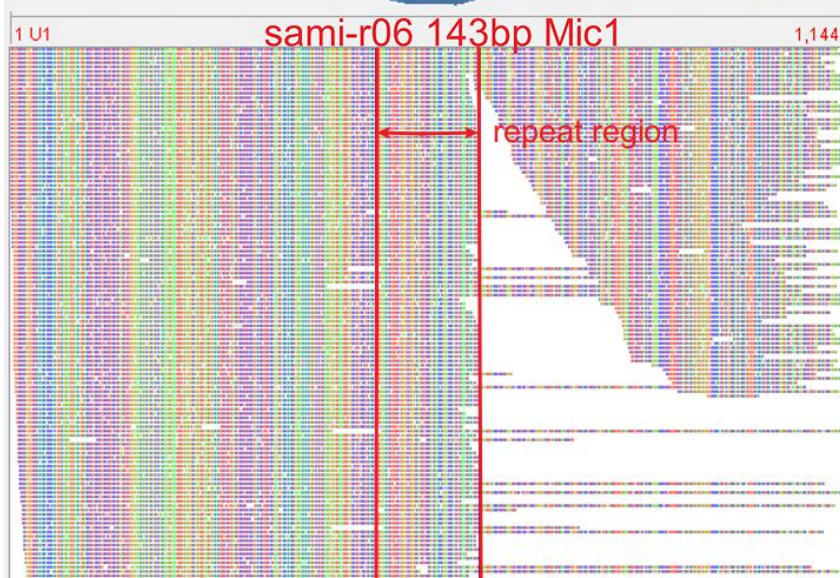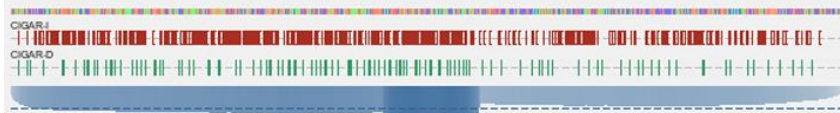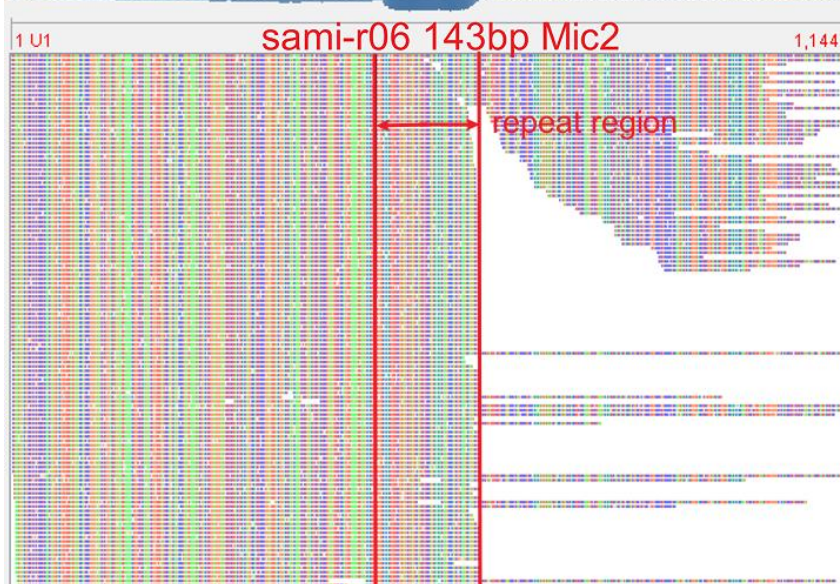



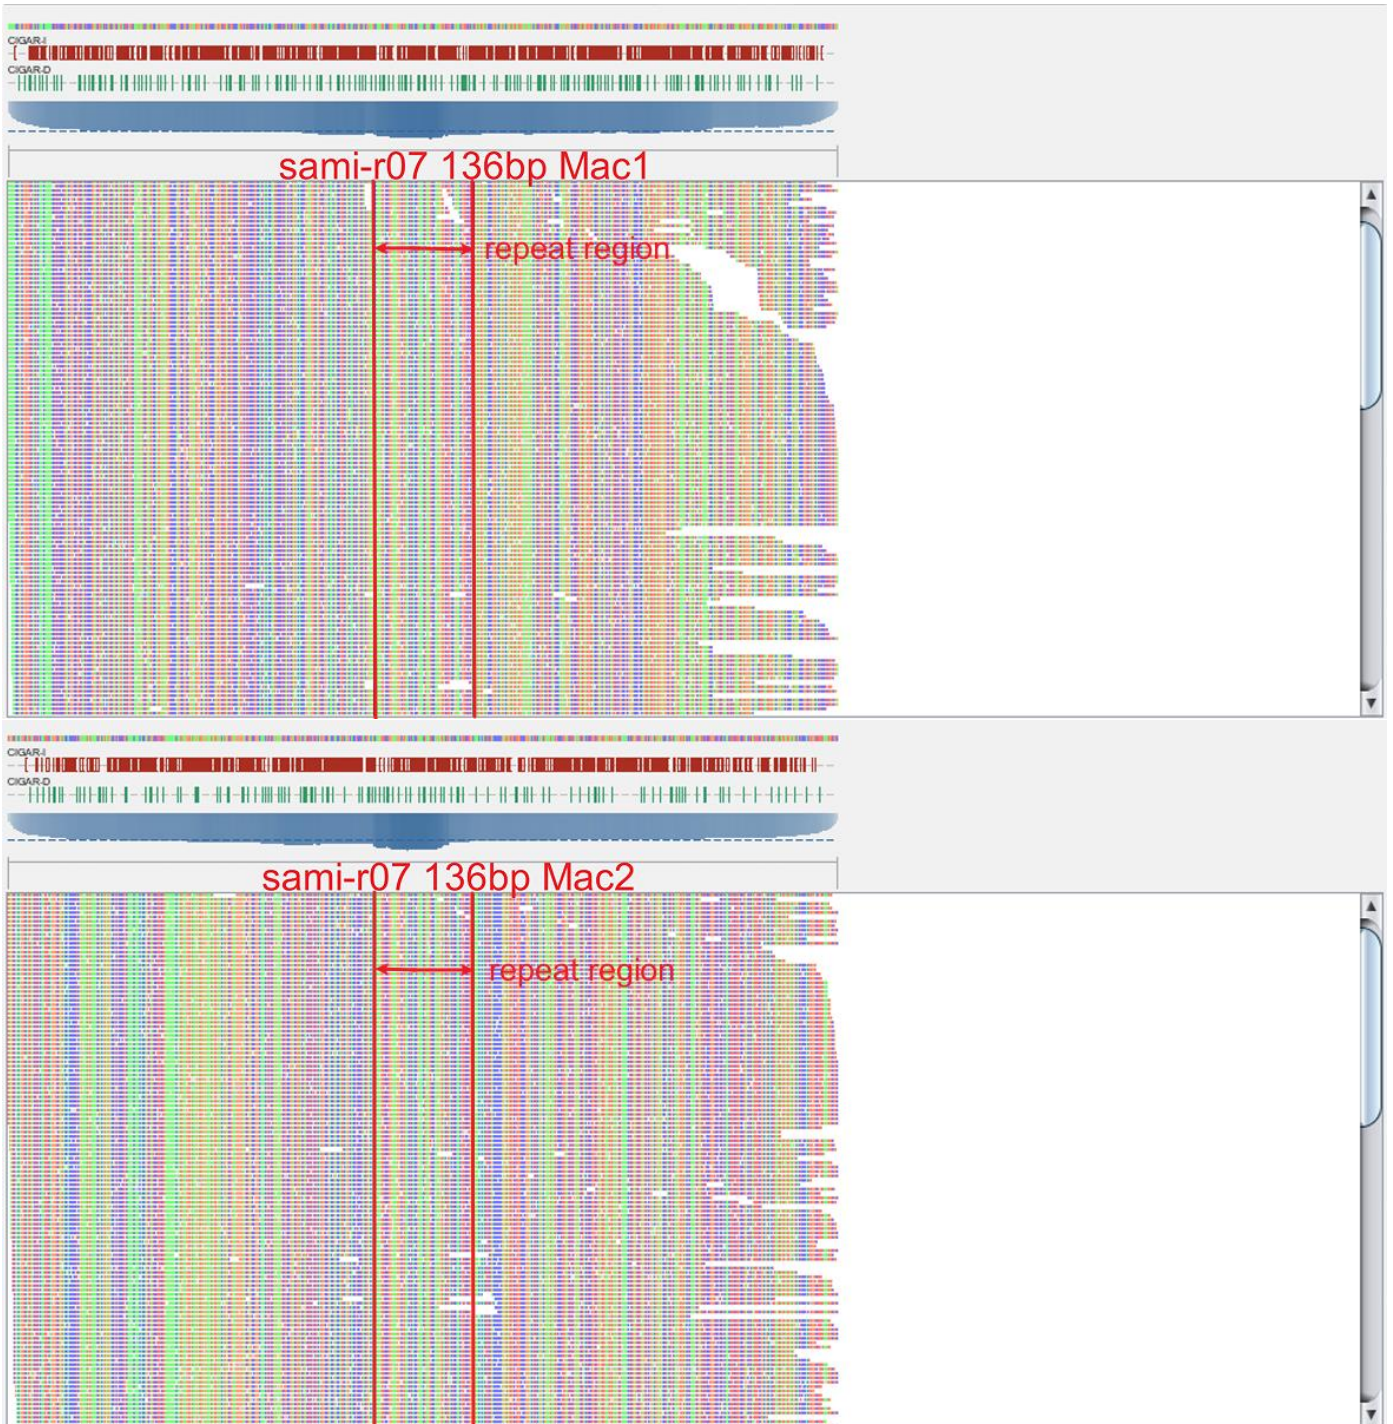



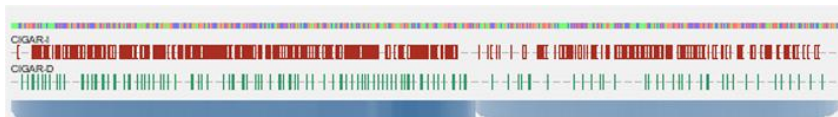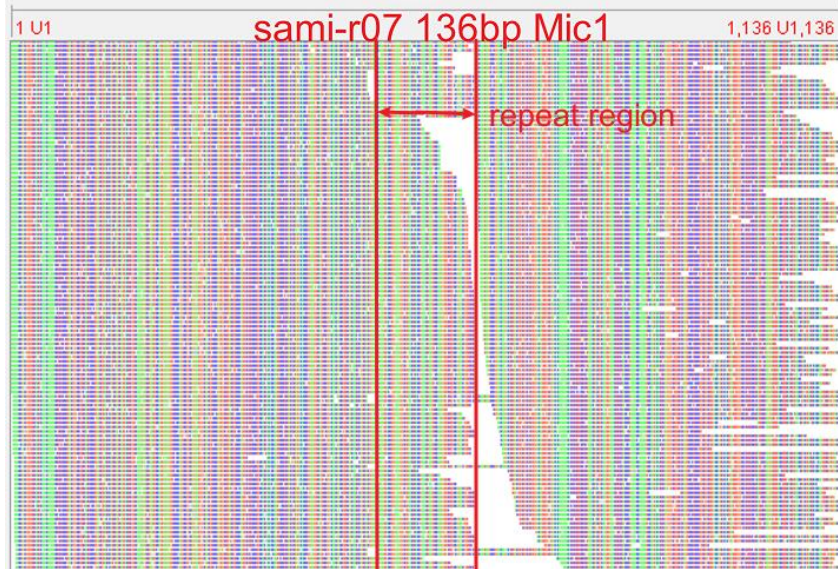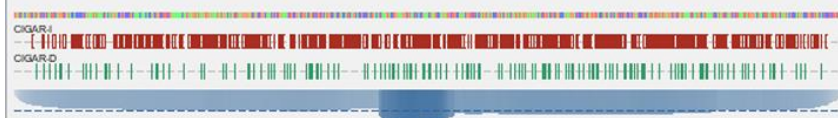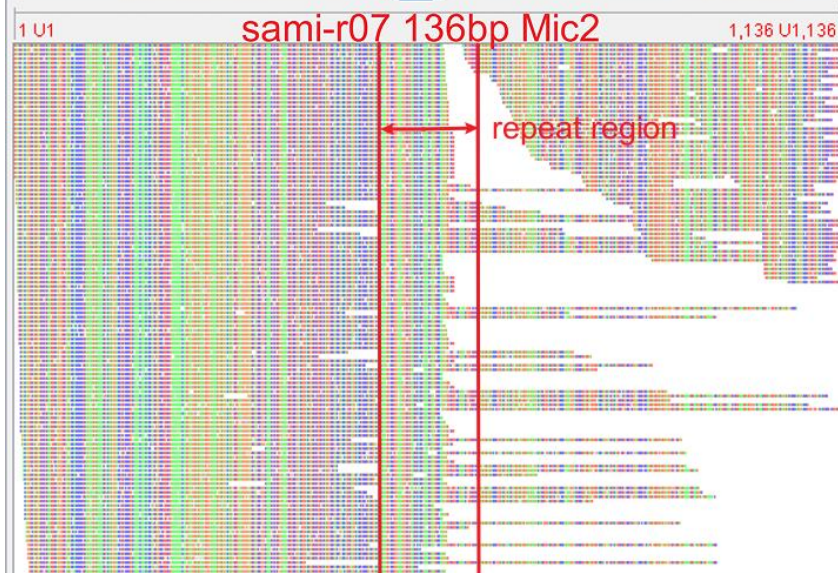

h

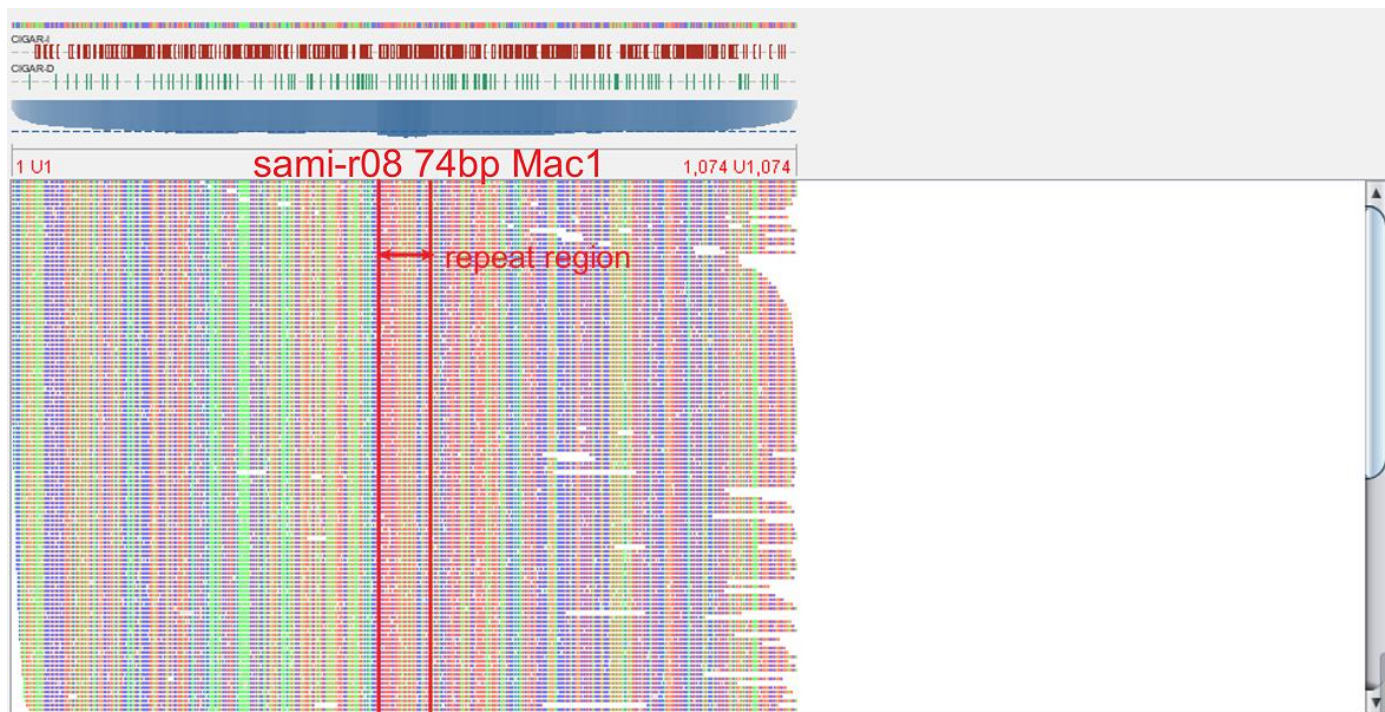







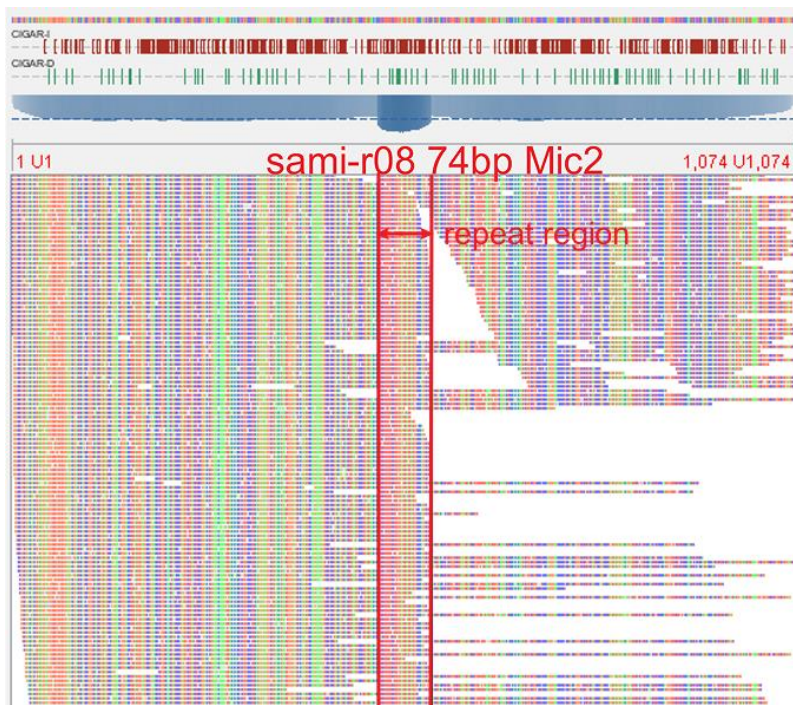

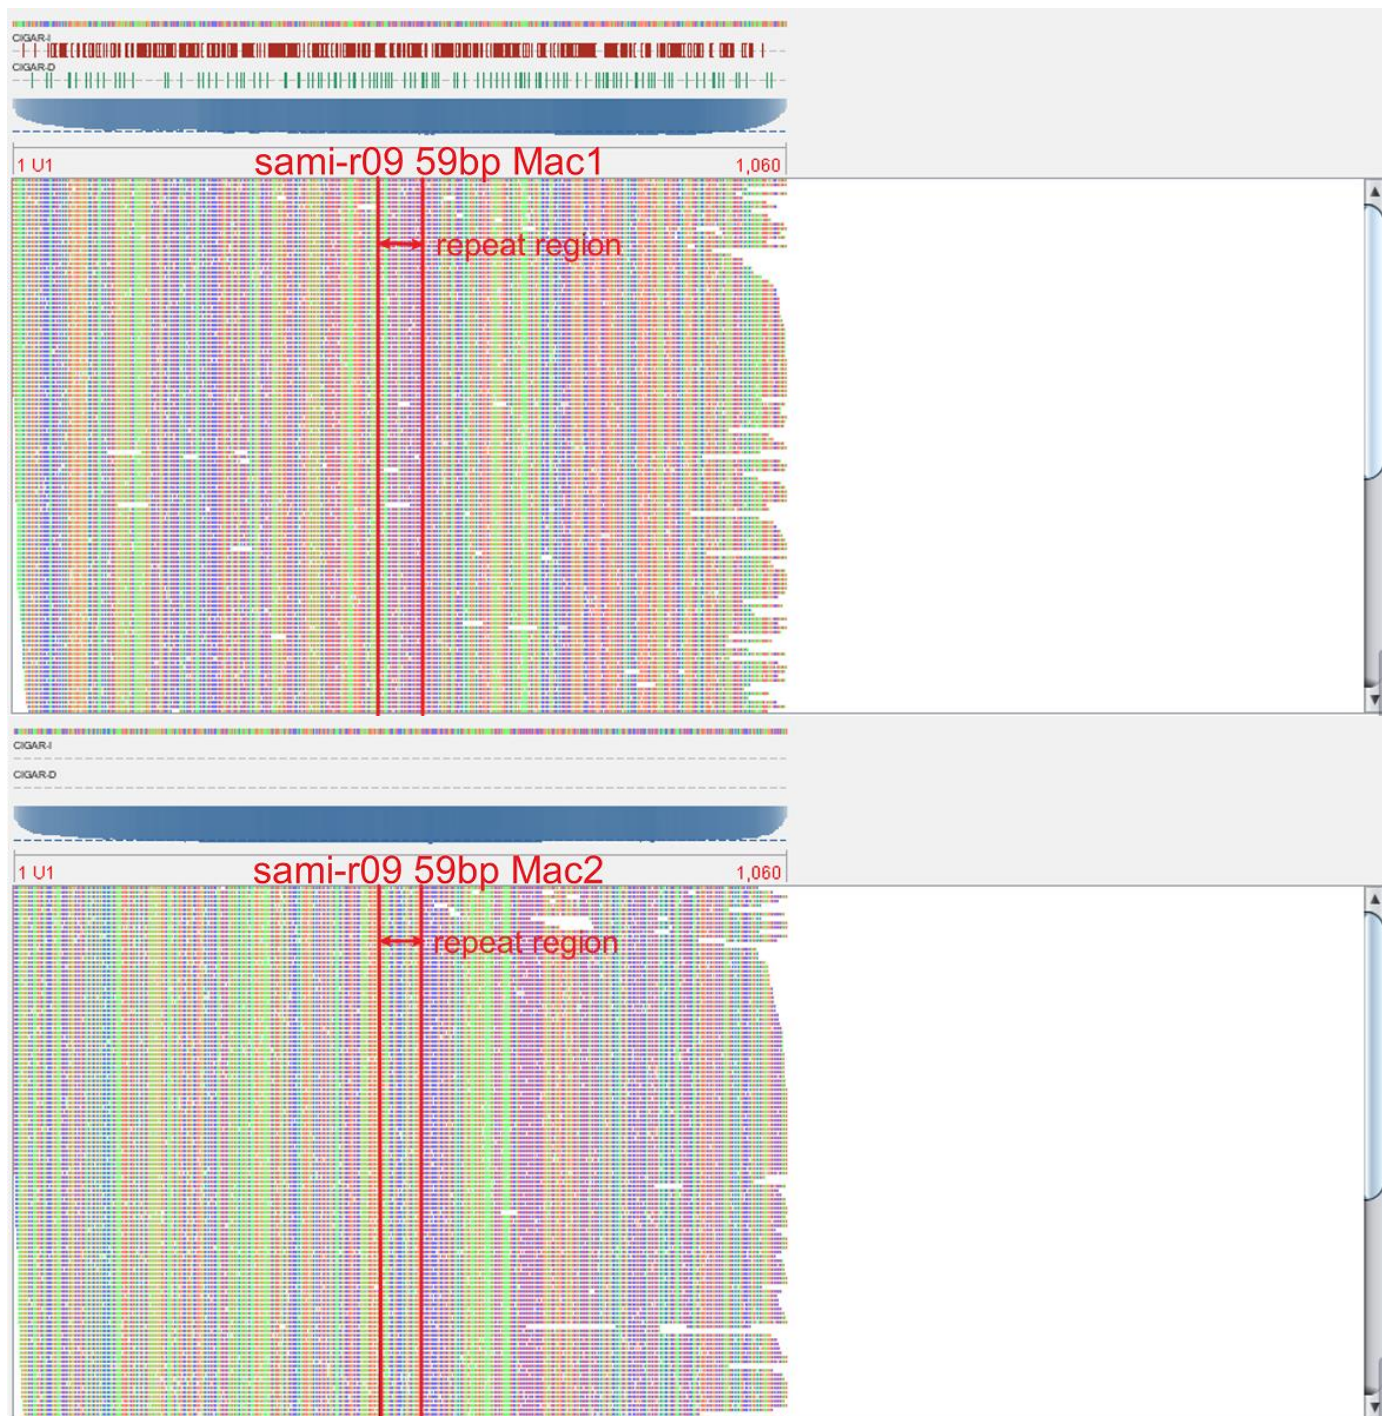



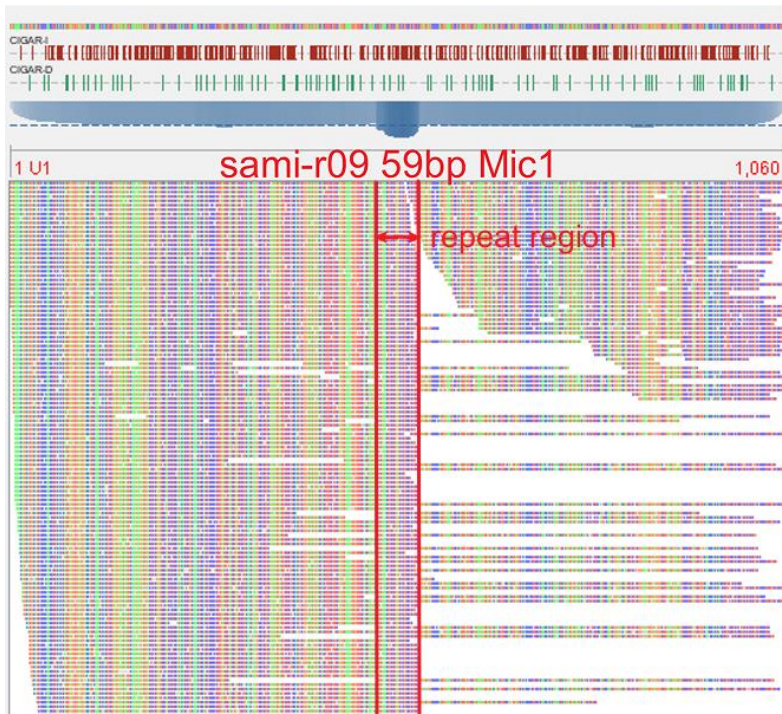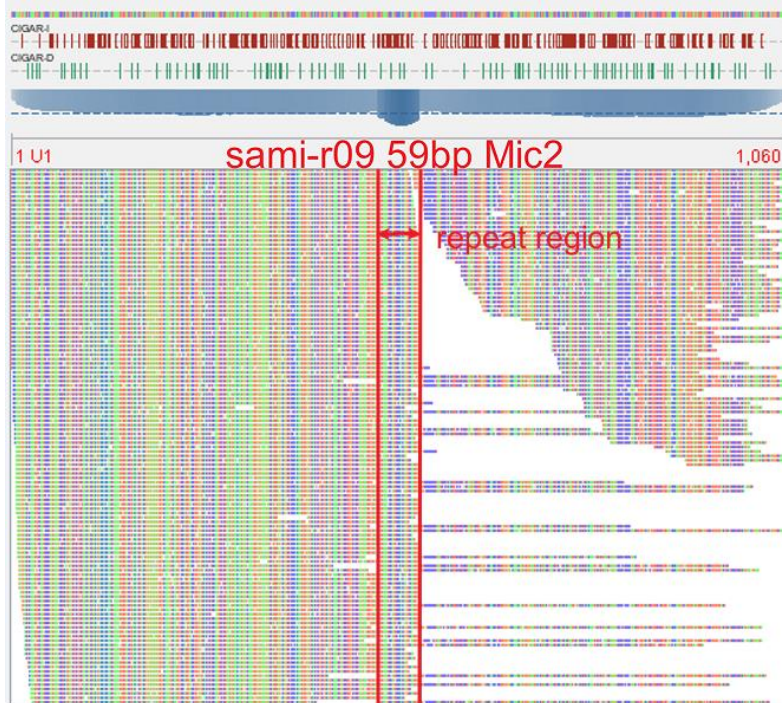



Figure S7. Validation of four conformations corresponding to the recombination products mediated by the nine repeats. PCR primers were designed based on the four conformations. The genomic DNAs were then amplified by PCR, and PCR products were subjected to Sanger sequencing. The sequencing chromatogram (top), Sanger sequencing results (labeled with “PCR” and conformation number), expected sequences (labeled with repeat ID and conformation number), and consensus sequences are shown from top to bottom. Panels a–i correspond to repeats of the r01 to r09 results, respectively. The sequences of r01–r09 are highlighted in yellow.

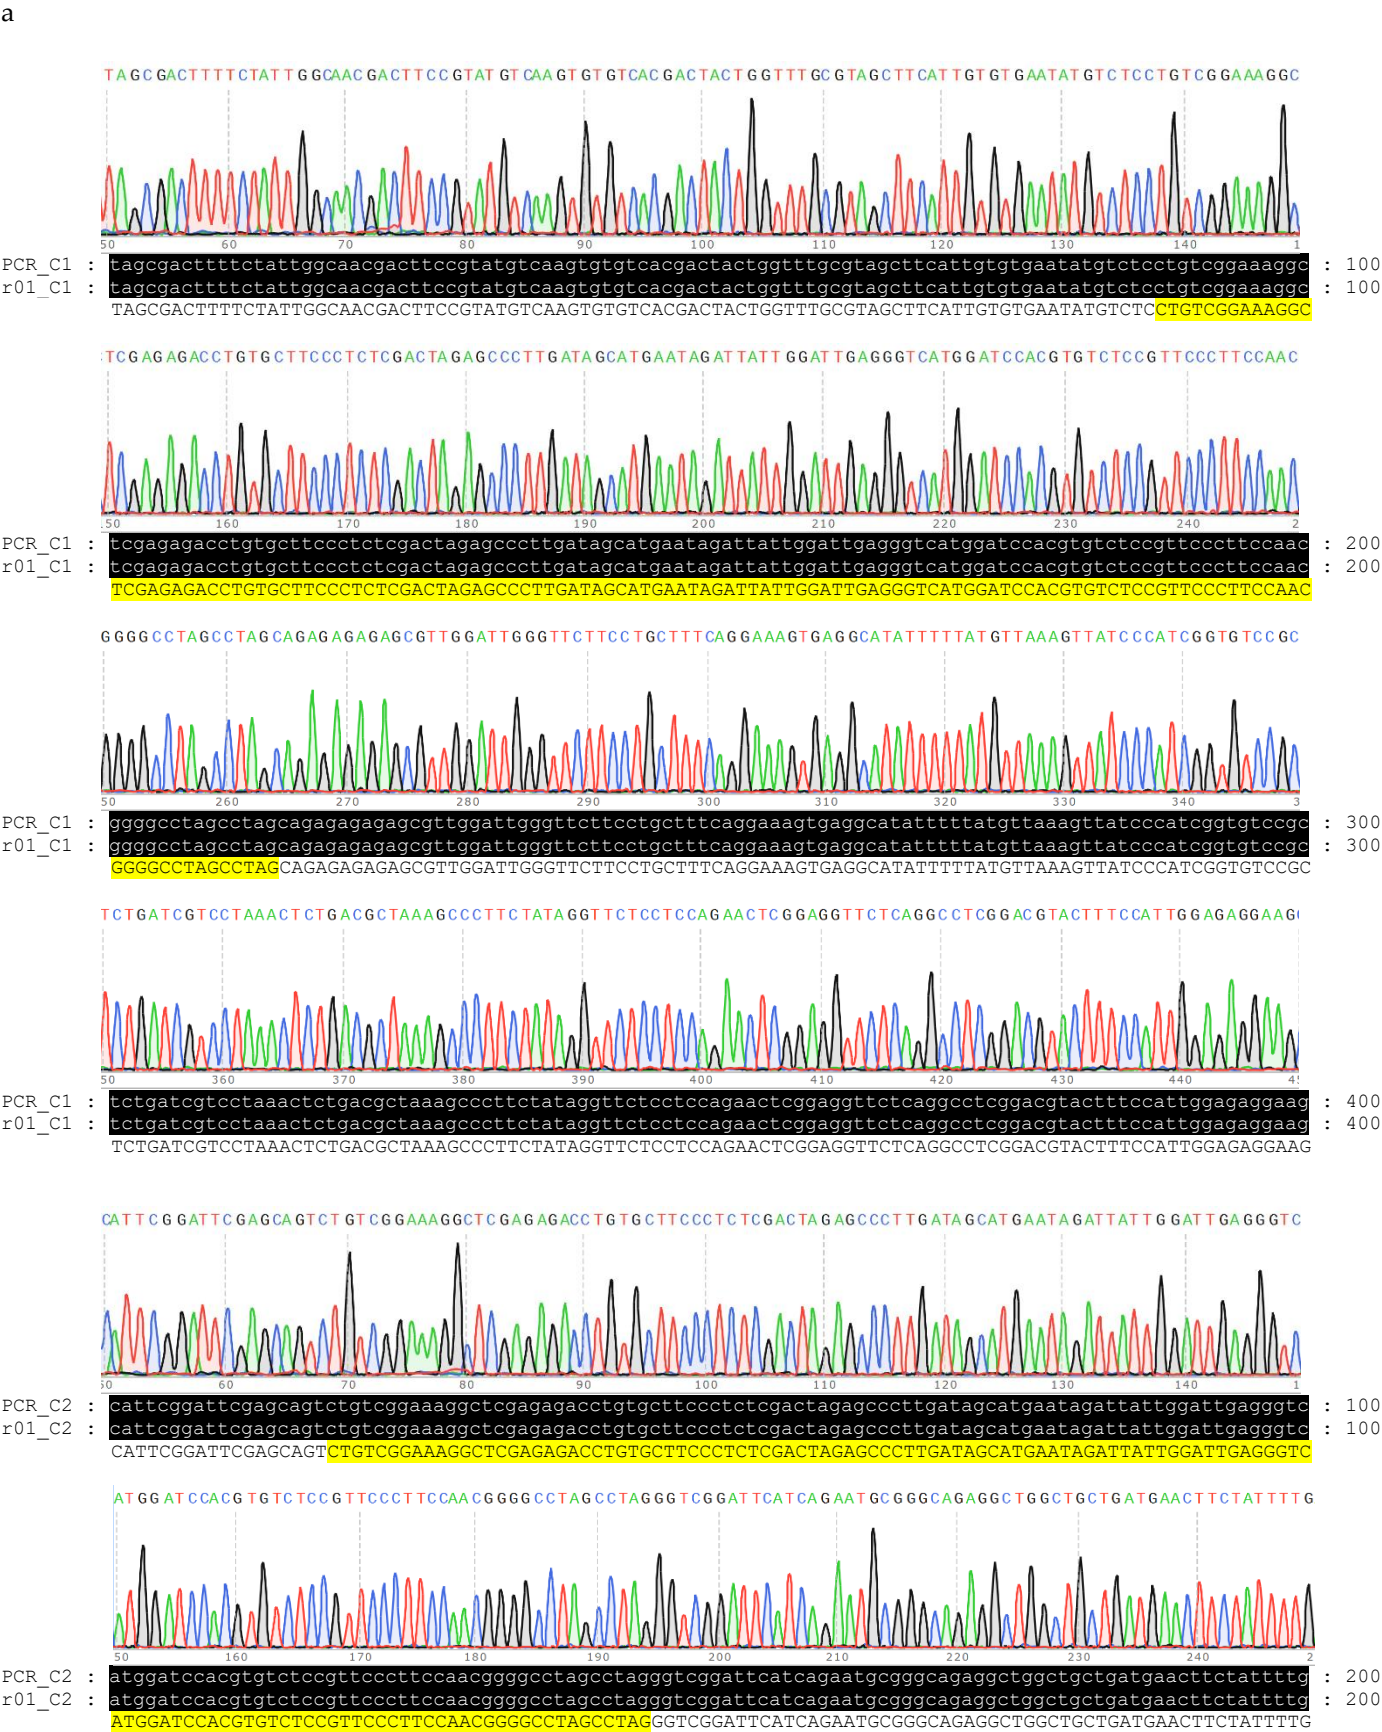

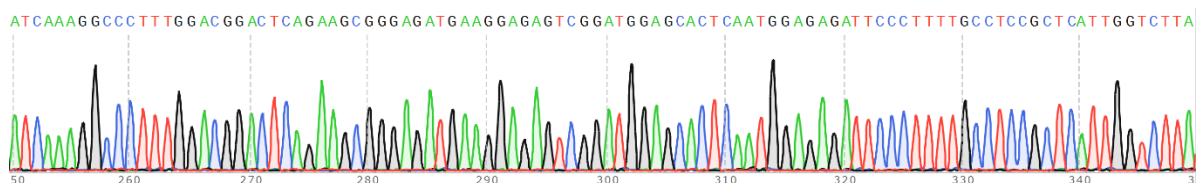

PCR\_C2 : atcaaagggccctttggacggactcagaagcgggagatgaaggagagtcggatggagcactcaatggagagattcccttttgctccgctcattgggtctta : 300  
 r01\_C2 : atcaaagggccctttggacggactcagaagcgggagatgaaggagagtcggatggagcactcaatggagagattcccttttgctccgctcattgggtctta : 300  
 ATCAAAGGCCCTTTGACGGACTCAGAAAGCGGAGATGAAGGAGAGTCGGATGGAGCACTCAATGGAGAGATTCCCTTTTGCTCCGCTCATTGGTCTTA

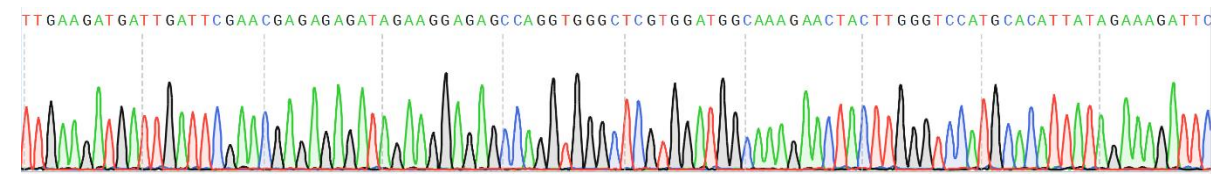

PCR\_C2 : ttgaagatgattgatttcgaacgagagagatagaaggagagccaggtgggctcgtggatggcaaagaactacttgggtccatgcacattatagaagattct : 400  
 r01\_C2 : ttgaagatgattgatttcgaacgagagagatagaaggagagccaggtgggctcgtggatggcaaagaactacttgggtccatgcacattatagaagattct : 400  
 TTGAAGATGATTGATTTCGAACGAGAGATAGAAGGAGAGCCAGGTGGCTCGTGGATGGCAAAGAACTACTTTGGGTCATGCACATTATAGAAGATTCT

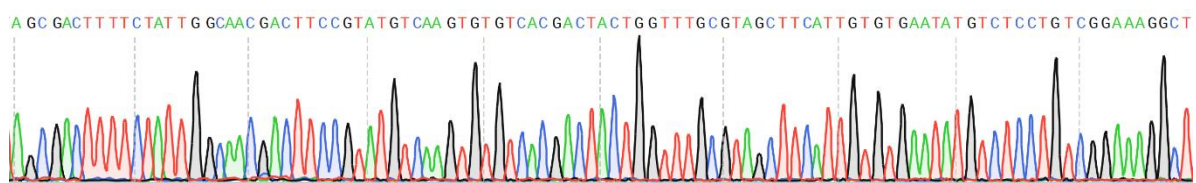

PCR\_C3 : agcgacttttctatttggaacgacttccgtatgtcaagtgtgtcagcactactgggttgcgtagcttcattgtgtgaatatgtctcctgtcggaaaggct : 100  
 r01\_C3 : agcgacttttctatttggaacgacttccgtatgtcaagtgtgtcagcactactgggttgcgtagcttcattgtgtgaatatgtctcctgtcggaaaggct : 100  
 AGCGACTTTTCTATTGGAACGACTTCCGTATGTCAA GTGTGTCACGACTACTGGTTTGCCTAGCTTCATTGTGTGAATATGTCTCTGTTCGGAAAGGCT

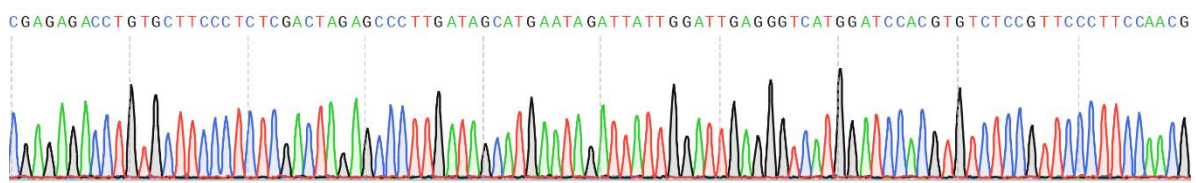

PCR\_C3 : cgagagacctgtgtctccctctcgactagagcccttgatagcatgaatagattattggattgagggatcatggatccacgtgtctccgttcccttccaacg : 200  
 r01\_C3 : cgagagacctgtgtctccctctcgactagagcccttgatagcatgaatagattattggattgagggatcatggatccacgtgtctccgttcccttccaacg : 200  
 CGAGAGACCTGTGCTTCCCTCTCGACTAGAGCCCTTGATAGCATGAATAGATTATTGGATTGAGGGTCATGGATCCACGTGTCTCCGTTCCTTCCAACG

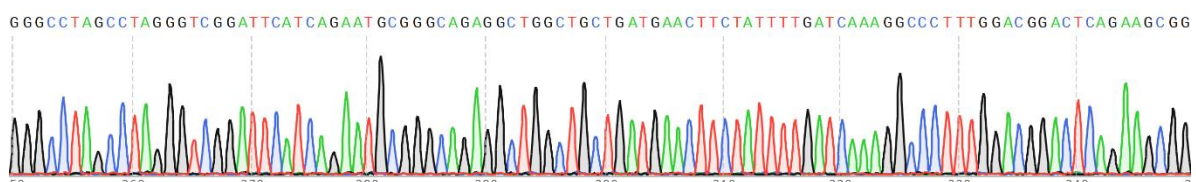

PCR\_C3 : gggcctagcctagggtcggattcatcagaatgcgggcagaggctggctgctgatgaacttctattttgatcaaagggccctttggacggactcagaagcgg : 300  
 r01\_C3 : gggcctagcctagggtcggattcatcagaatgcgggcagaggctggctgctgatgaacttctattttgatcaaagggccctttggacggactcagaagcgg : 300  
 GGGCCTAGCCTAGGGTCGATTTCATCAGAAATGCGGGCAGAGGCTGGCTGCTGATGAACCTTCTATTTTGATCAAAGGCCCTTTGACGGACTCAGAAAGCGG

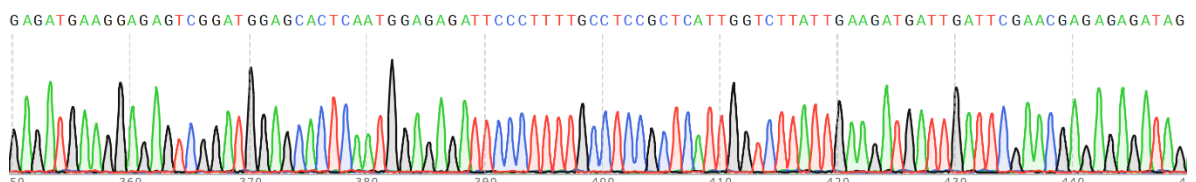

PCR\_C3 : gagatgaaggagagtcggatggagcactcaatggagagattcccttttgctccgctcattgggtcttattgaagatgattgattcgaacgagagagatag : 400  
 r01\_C3 : gagatgaaggagagtcggatggagcactcaatggagagattcccttttgctccgctcattgggtcttattgaagatgattgattcgaacgagagagatag : 400  
 GAGATGAAGGAGAGTCGGATGGAGCACTCAATGGAGAGATTCCCTTTTGCTCCGCTCATTGGTCTTATTGAAGATGATTGATTTCGAACGAGAGAGATAG

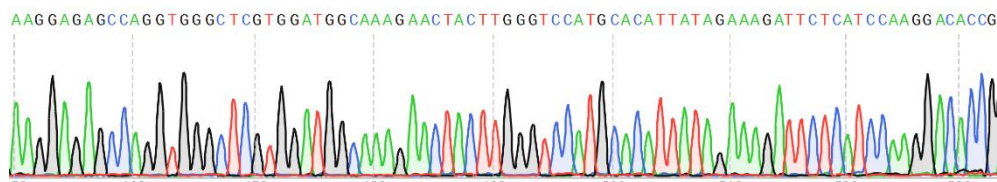

PCR\_C3 : aaggagagccaggtgggctcgtggatggcaaagaactacttgggtccatgcacattatagaagattctcatccaaggacacgg : 484  
 r01\_C3 : aaggagagccaggtgggctcgtggatggcaaagaactacttgggtccatgcacattatagaagattctcatccaaggacacgg : 484  
 AAGGAGAGCCAGGTGGGCTCGTGGATGGCAAAGAACTACTTGGGTCATGCACATTATAGAAGATTCTCATCCAAGGACACCG







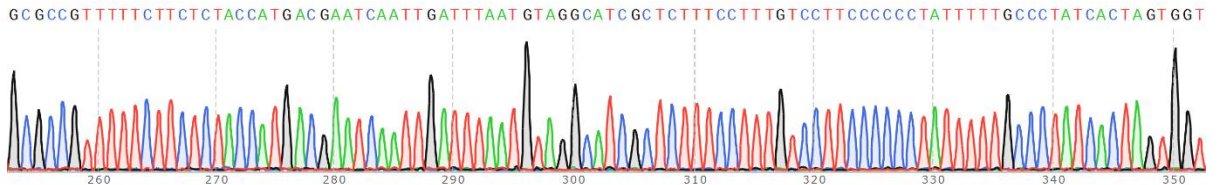

PCR\_C1 : gcgccgtttttcttctctacatgacgaatcaattgatttaatgtaggcatcgctctttcctttgtccttccccctatTTTTGCCCTATCACTAGTGGT :  
300  
r02\_C1 : gcgccgtttttcttctctacatgacgaatcaattgatttaatgtaggcatcgctctttcctttgtccttccccctatTTTTGCCCTATCACTAGTGGT :  
300

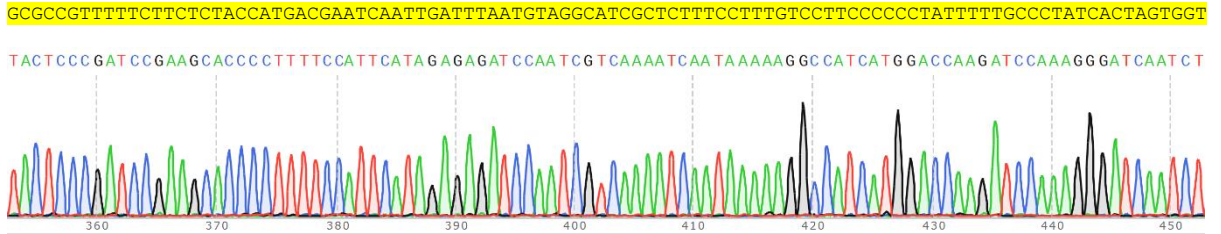

PCR\_C1 : tactcccgatccgaagcacccttttccattcatagagagatccaatcgTCAAAATCAATAAAAAGGCCATCATGGACCAAGATCCAAAGGGATCAATCT :  
400  
r02\_C1 : tactcccgatccgaagcacccttttccattcatagagagatccaatcgTCAAAATCAATAAAAAGGCCATCATGGACCAAGATCCAAAGGGATCAATCT :  
400

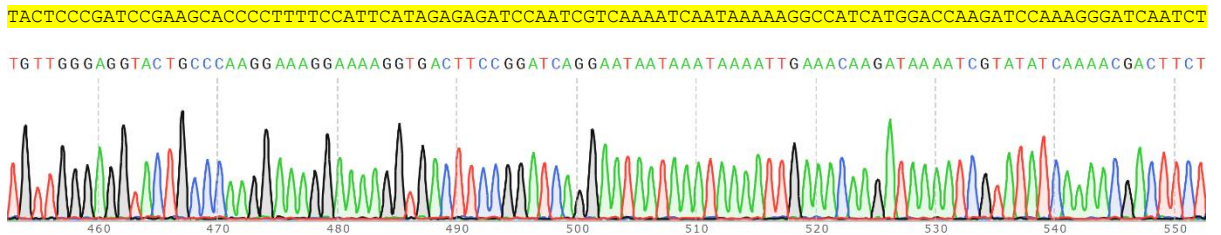

PCR\_C1 : tgttgggaggtactgccaaggaaggaaggaaggtgacttccggatcaggaataataaataaaattgaaacaagataaaatcgTATATCAAAACGACTTCT :  
500  
r02\_C1 : tgttgggaggtactgccaaggaaggaaggaaggtgacttccggatcaggaataataaataaaattgaaacaagataaaatcgTATATCAAAACGACTTCT :  
500

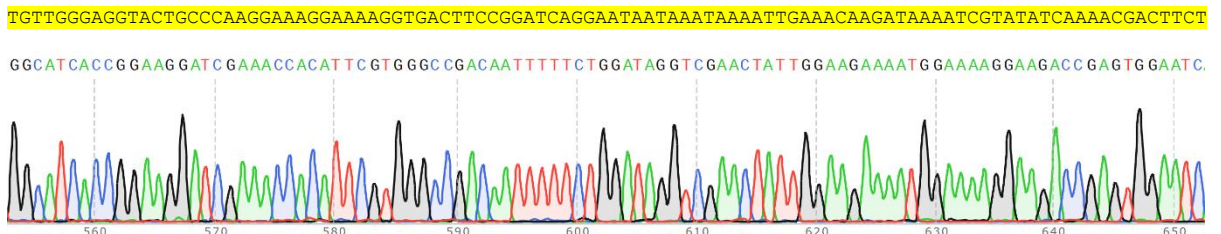

PCR\_C1 : ggcataccggaaggatcgaaaccacatttcgtgggccgacaatttttctggataggtTGAACATATTGGAAGAAAATGGAAGGAAAGACCGAGTGGAATC :  
600  
r02\_C1 : ggcataccggaaggatcgaaaccacatttcgtgggccgacaatttttctggataggtTGAACATATTGGAAGAAAATGGAAGGAAAGACCGAGTGGAATC :  
600

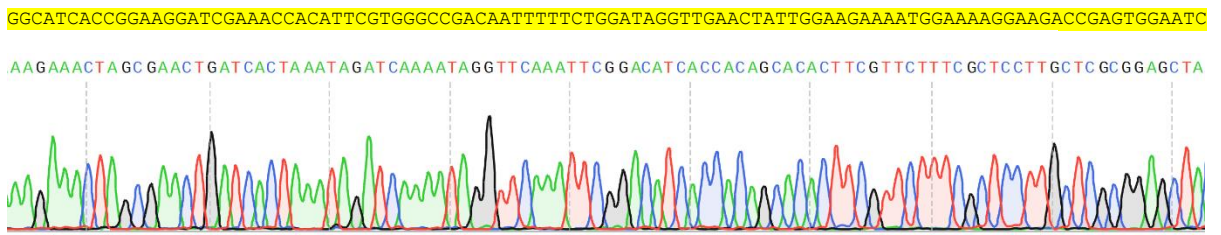

PCR\_C1 : aaagaaactagcgaactgatcactaaatagatcaaaataggttcaaattcggacatcaccacagcacacttcgTCTTTCGCTCCTTGTCTCGCGGAGCTA :  
700  
r02\_C1 : aaagaaactagcgaactgatcactaaatagatcaaaataggttcaaattcggacatcaccacagcacacttcgTCTTTCGCTCCTTGTCTCGCGGAGCTA :  
700

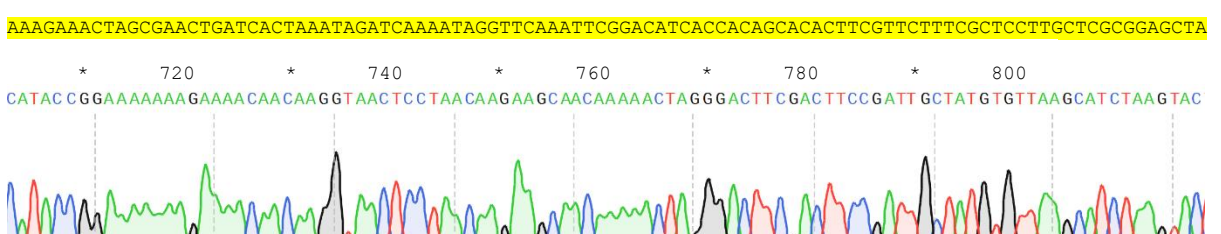

PCR\_C1 : cataccggaaaaaaagaaaaacaagtaactcctaacaagaagcaaaaaactagggaacttcgacttcgattgctatgtgttaagcatctaagtac :  
800  
r02\_C1 : cataccggaaaaaaagaaaaacaagtaactcctaacaagaagcaaaaaactagggaacttcgacttcgattgctatgtgttaagcatctaagtac :  
800

CATACCGGAAAAAAGAAAAACAAGGTAACCTCTAAACAAGAGCAACAAAACTAGGGACTTCGACTTCGATTGCTATGTGTTAAGCATCTAAGTAC

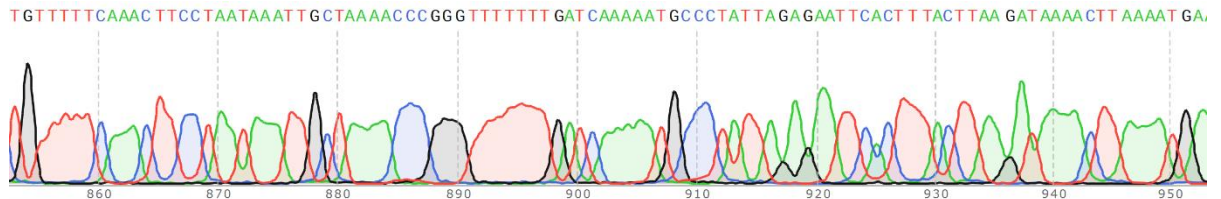

PCR\_C1 : **tgtttttc**aaacttcctaataaattgctaaaacccgggtttttttgatcaaaaatgccctattagagaattcactttacttaagataaaaacttaaaatga :  
 900  
 r02\_C1 : **tgtttttc**aaacttcctaataaattgctaaaacccgggtttttttgatcaaaaatgccctattagagaattcactttacttaagataaaaacttaaaatga :  
 900

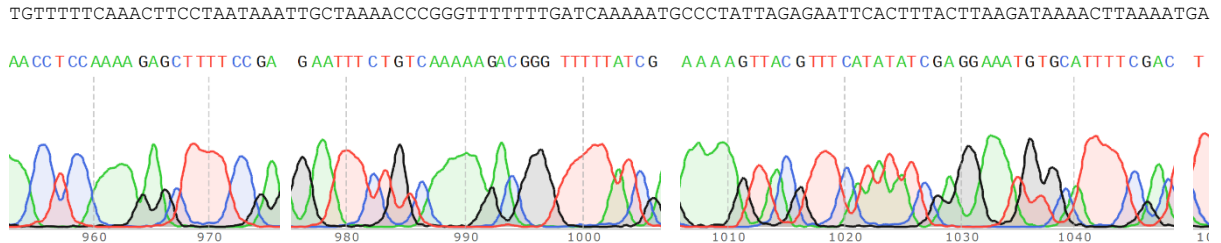

PCR\_C1 : **aacctcc**aaaagagctttttccga-gaatttctgtcaaaaagacgggtttttatcg-aaaagttacgtttcatatatcgaggaaatgtgcattttcgac-t :  
 997  
 r02\_C1 : **aacctcc**aaaagagctttttccga-gaatttctgtcaaaaagacgggtttttatcg-aaaagttacgtttcatatatcgaggaaatgtgcattttcgac-t :  
 1000

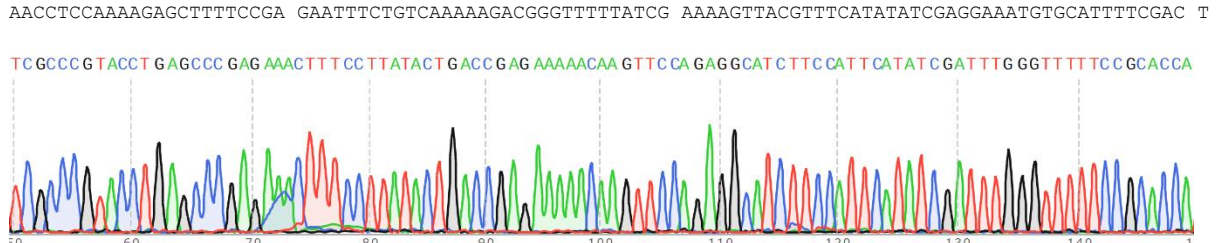

PCR\_C2 : **tcgccc**gtacctgagcccgagaaaactttccttatactgaccgagaaaaacaagtccagaggcatcttcattcatatcgatttgggtttttccgcacca : 100  
 r02\_C2 : **tcgccc**gtacctgagcccgagaaaactttccttatactgaccgagaaaaacaagtccagaggcatcttcattcatatcgatttgggtttttccgcacca : 100  
 TCGCCCGTACCTGAGCCCGAGAACTTTCTTTACTGACCGAGAAAACAA GTTCCA GAGGCATCTTCATT CATATCGAATTTGGTTTTCCGCACCA

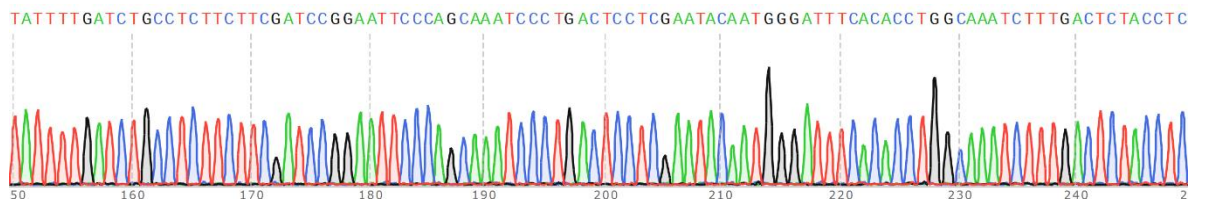

PCR\_C2 : **tatttt**gatctgcctcttcttcgatccggaattccagcaaatccctgactcctcgatacaatgggatttcacacctggcaaatctttgactctacctc : 200  
 r02\_C2 : **tatttt**gatctgcctcttcttcgatccggaattccagcaaatccctgactcctcgatacaatgggatttcacacctggcaaatctttgactctacctc : 200  
 TATTTTGATCTGCCTCTTCTTCGATCCGGAATTCCAGCAAATCCCTGACTCCTCGAATACAATGGGATTTACACCTGGCAAATCTTTGACTCTACCTC

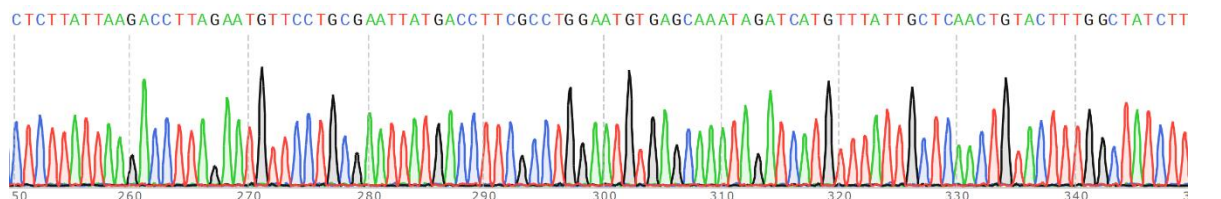

PCR\_C2 : **ctctta**ttaagaccttagaattgttctcgcaattatgacacctcgctggaatgtgagcaaatagatcatgtttattgctcaactgtactttggctatctt : 300  
 r02\_C2 : **ctctta**ttaagaccttagaattgttctcgcaattatgacacctcgctggaatgtgagcaaatagatcatgtttattgctcaactgtactttggctatctt : 300  
 CTCTTATTAAGACCTTAGAATGTTCTGCGAATTATGACCTTCGCCTGGAATGTGAGCAAATAGATCATGTTTATTGCTCAACTGTACTTTGGCTATCTT

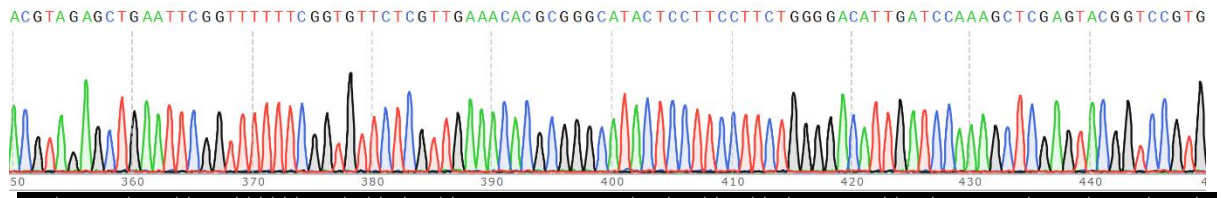

PCR\_C2 : **acgtag**agctgaattcgggttttttcgggtgttctcgttgaaacacgcgggcactactccttctcttctggggacattgatccaaagctcgagtacggtcctgtg : 400  
 r02\_C2 : **acgtag**agctgaattcgggttttttcgggtgttctcgttgaaacacgcgggcactactccttctcttctggggacattgatccaaagctcgagtacggtcctgtg : 400  
 ACGTAGAGCTGAATTCGGTTTTTTCGGTGTTCCTGTGAACACGCGGGCATACTCCTTCTCTTCTGGGACATTGATCCAAAGCTCGAGTACGGTCCGTG



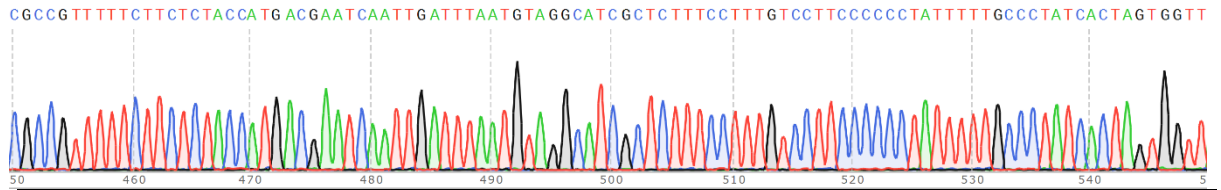

PCR\_C2 : cgccggtttttcttctctaccatgacgaatcaattgatttaatgtaggcatcgctctttcctttgtccttccccctatttttgccctatcactagtggtt : 500  
 r02\_C2 : cgccggtttttcttctctaccatgacgaatcaattgatttaatgtaggcatcgctctttcctttgtccttccccctatttttgccctatcactagtggtt : 500  
 CGCCGTTTTCCTCTCTACCATGACGAATCAATTGATTTAATGTAGGCATCGCTCTTTCCTTTGTCTTCCCCCTATTTTGGCCATCACTAGTGGTT

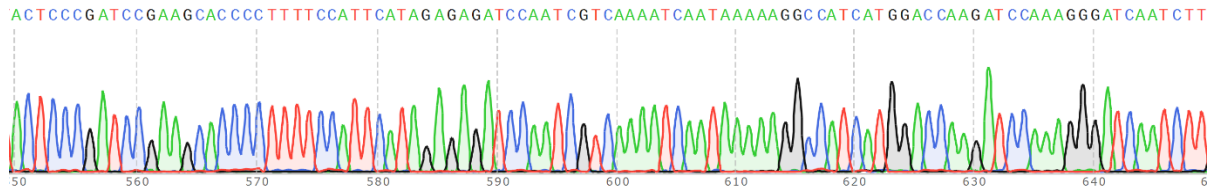

PCR\_C2 : actcccgatccgaagcacccttttccattcatagagagatccaatcgtcaaaatcaataaaaaaggccatcatggaccaagatccaaagggatcaatctt : 600  
 r02\_C2 : actcccgatccgaagcacccttttccattcatagagagatccaatcgtcaaaatcaataaaaaaggccatcatggaccaagatccaaagggatcaatctt : 600  
 ACTCCCGATCCGAAGCACCCCTTTCCATTTCATAGAGAGATCCAATCGTCAAAATCAATAAAAAAGGCCATCATGGACCAAGATCCAAAGGGATCAATCTT

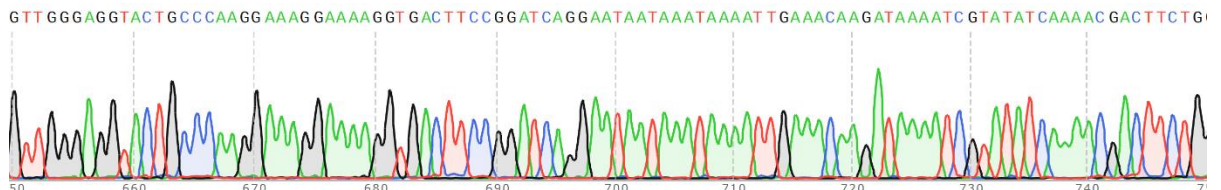

PCR\_C2 : gttgggaggtactgcccaaggaaaggaaaaggtgacttccggatcagggaataataataaaaattgaaacaagataaaatcgtatatcaaaacgacttctg : 700  
 r02\_C2 : gttgggaggtactgcccaaggaaaggaaaaggtgacttccggatcagggaataataataaaaattgaaacaagataaaatcgtatatcaaaacgacttctg : 700  
 GTTGGGAGGTACTGCCCAAGGAAAGGAAAGGTGACTTCCGGATCAGGAATAATAAATAAAATTGAAACAAGATAAAATCGTATATCAAAACGACTTCTG

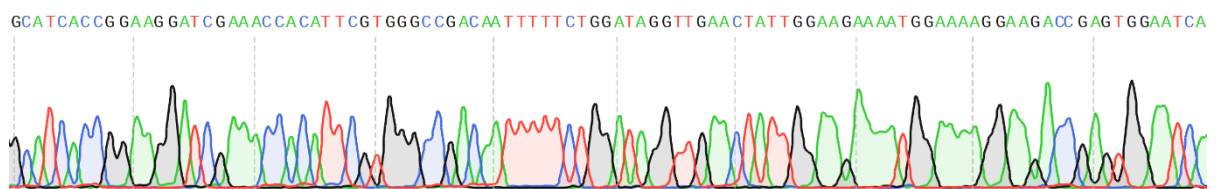

PCR\_C2 : gcatcaccggaaggatcgaaaccacattcgtgggccgacaatttttctggataggttgaactattggaagaaaatgaaaaggaaagaccgagtggaatca : 800  
 r02\_C2 : gcatcaccggaaggatcgaaaccacattcgtgggccgacaatttttctggataggttgaactattggaagaaaatgaaaaggaaagaccgagtggaatca : 800  
 GCATCACCGGAAGGATCGAACCACATTTCGTGGGCCGACAATTTTCTGGATAGGTTGAACATATTGGAAGAAAATGAAAAGGAAGACCAGTGGAATCA

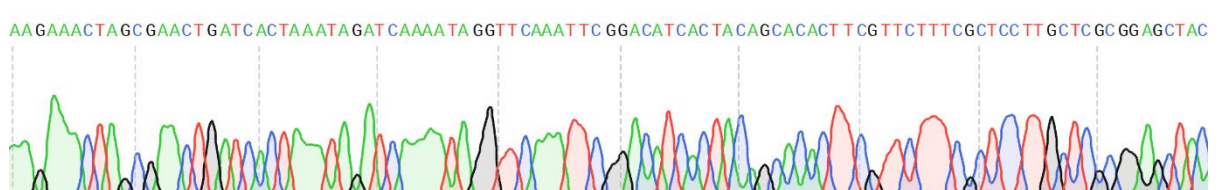

PCR\_C2 : aagaaactagcgaactgatcactaaatagatcaaaataggttcaaatcggacatcactacagcacacttcgttctttcgtccttgcctcgcgagctac : 900  
 r02\_C2 : aagaaactagcgaactgatcactaaatagatcaaaataggttcaaatcggacatcactacagcacacttcgttctttcgtccttgcctcgcgagctac : 900  
 AAGAAACTAGCGAAGTATCACTAAATAGATCAAAATAGGTTCAAATTCGGACATCACTACAGCACACTTCGTCTTTTCGCTCCTTGCTCGCGGAGCTAC

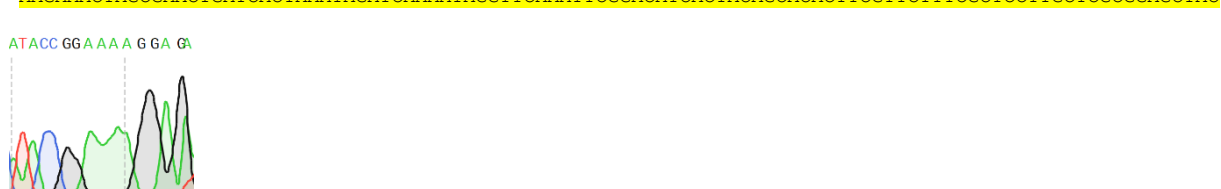

PCR\_C2 : ataccggaagga : 916  
 r02\_C2 : ataccggaagga : 916  
 ATACCGGAAA G GA

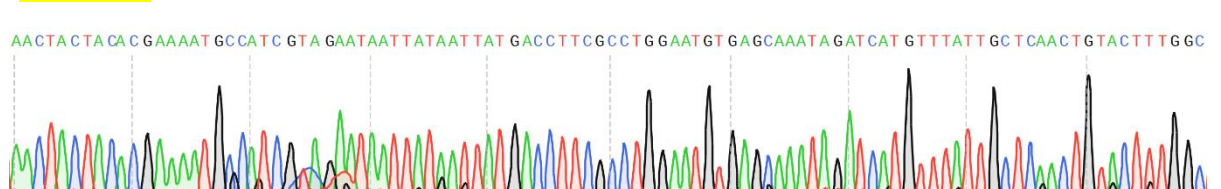

PCR\_C3 : aactactacagaaaatgccatcgtagaataattataattatgaccttcgctggaatgtgagcaaatagatcatgtttattgctcaactgtactttggc : 100  
 r02\_C3 : aactactacagaaaatgccatcgtagaataattataattatgaccttcgctggaatgtgagcaaatagatcatgtttattgctcaactgtactttggc : 100  
 AACTACTACAGAAAATGCCATCGTAGAATAATTAT AATTATGACCTTCGCCTGGAATGTGAGCAAAATAGATCATGTTTATTGCTCAACTGTACTTTGGC



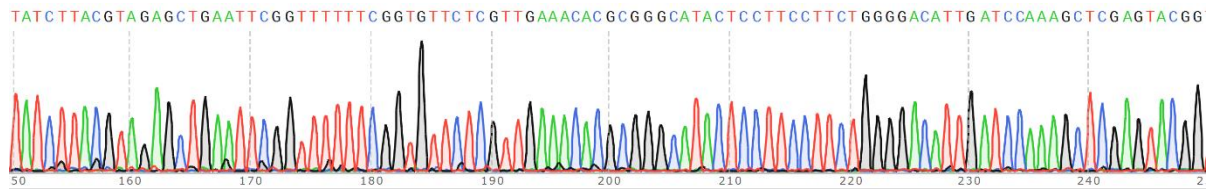

PCR\_C3 : tatcttacctagagctgaattcgggttttttcgggtgttctcggtgaaacacgcgggcatactccttctctctggggacattgatccaagctcgagtacgg : 200  
 r02\_C3 : tatcttacctagagctgaattcgggttttttcgggtgttctcggtgaaacacgcgggcatactccttctctctggggacattgatccaagctcgagtacgg : 200  
**TATCTTACGTAGAGCTGAATTCGGTTTTTTCGGTGTTCCTCGTTGAAACACGCGGGCATACTCCTTCCTTCTG6GGACATTGATCCAAAGCTCGAGTACGG**

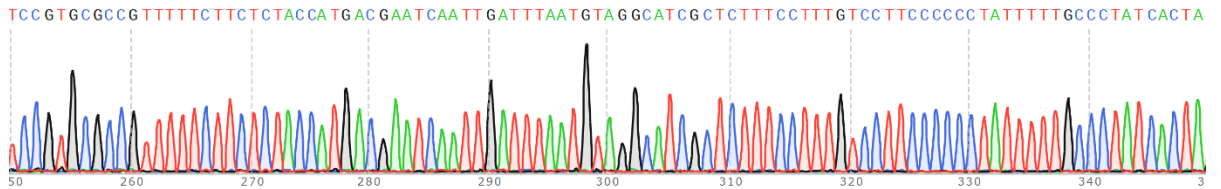

PCR\_C3 : tccgtgcgccgtttttcttcttaccatgacgaatcaattgatttaattgtaggcacgctcttcttcttcccccctatttttgccctatcacta : 300  
 r02\_C3 : tccgtgcgccgtttttcttcttaccatgacgaatcaattgatttaattgtaggcacgctcttcttcttcccccctatttttgccctatcacta : 300  
**TCCGTGCGCGTTTTCTTCTACCATGACGAATCAATTGATTTAATGTAGGATCGCTCTTTCCTTGTCCCTTCCCCCTATTTTTGCCCTATCACTA**

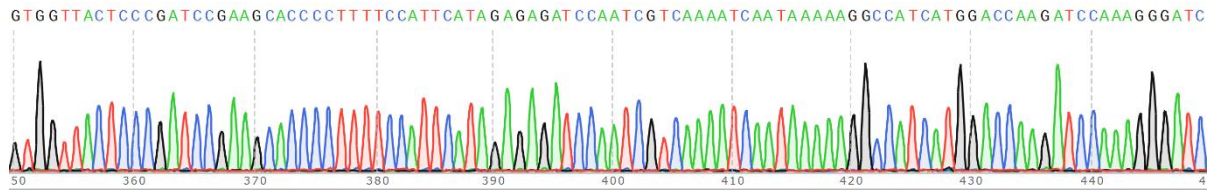

PCR\_C3 : gtggttactcccgatccgaagcaccccttttccattcatagagagatccaatcgtaaaaatcaataaaaaggccatcatggaccaagatccaaagggatc : 400  
 r02\_C3 : gtggttactcccgatccgaagcaccccttttccattcatagagagatccaatcgtaaaaatcaataaaaaggccatcatggaccaagatccaaagggatc : 400  
**GTGGTTACTCCGATCCGAAAGCACCCTTTTCCATTATAGAGAGATCCAATCGTCAAAATCAATAAAAAGGCCATCATGGACCAAGATCCAAAGGGATC**

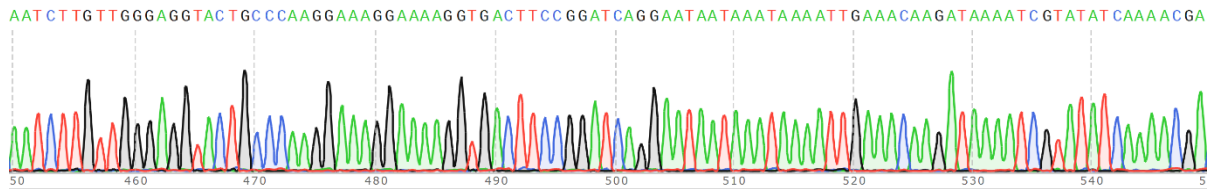

PCR\_C3 : aatcttgttgggaggtactgcccaaggaaaggaaagggtgacttccggatcagggaataataaataaaattgaacaagataaaatcgatatataaaacga : 500  
 r02\_C3 : aatcttgttgggaggtactgcccaaggaaaggaaagggtgacttccggatcagggaataataaataaaattgaacaagataaaatcgatatataaaacga : 500  
**AATCTTGTTGGGAGGTACTGCCAAGGAAAGGAAAGGTGACTTCCGGATCAGGAATAATAAATAAAATTGAACAAGATAAAATCGTATATCAAAACGA**

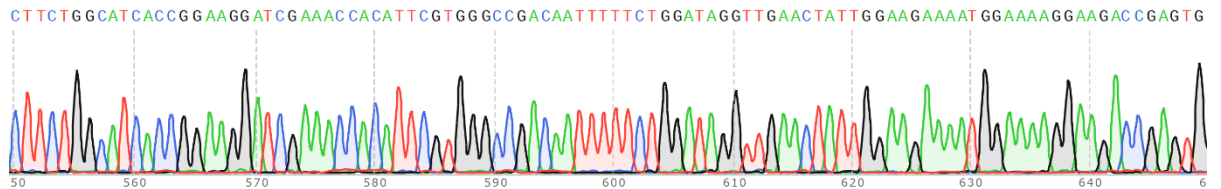

PCR\_C3 : cttctggcatcacccgaaggatcgaaaccacattctgtggccgacaatttttctggataggttgaaactattggaagaaaatggaaaagggaagaccgagtg : 600  
 r02\_C3 : cttctggcatcacccgaaggatcgaaaccacattctgtggccgacaatttttctggataggttgaaactattggaagaaaatggaaaagggaagaccgagtg : 600  
**CTTCTGGGATCACCAGGATCGAAACACATTCTGGGCGGACAAATTTTCTGGATAGGTTGAACATTGGAAGAAAATGGAAAAAGGAAGACCGAGTG**

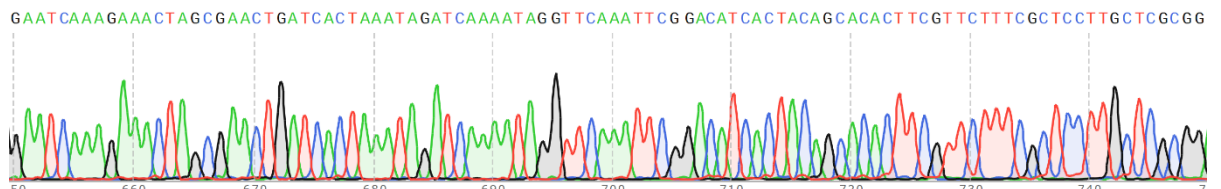

PCR\_C3 : gaatcaaagaaactagcgaactgatcactaaatagatcaaaatagggttcaaattcggacatcacacacagcacacttcgttcttctgctccttgcgcgg : 700  
 r02\_C3 : gaatcaaagaaactagcgaactgatcactaaatagatcaaaatagggttcaaattcggacatcacacacagcacacttcgttcttctgctccttgcgcgg : 700  
**GAATCAAAGAACTAGCGAAGTATCACTAAATAGATCAAAATAGGTTCAAAATCGGACATCACACAGCACACTCGTCTTTTCGCTCCTTGCTCGCGG**

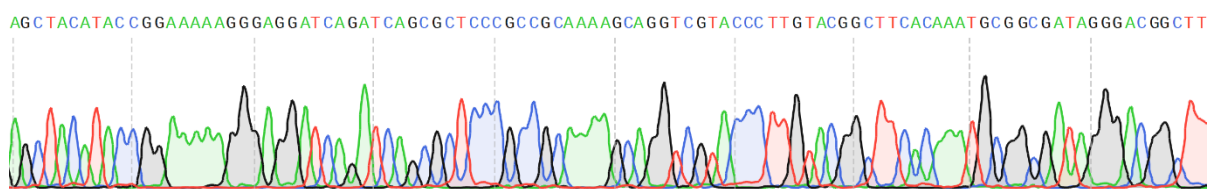

PCR\_C3 : agctacataccggaaaaaggaggatcagatcagcgctcccgccgaaaagcaggtcgtaacctgtacggcttcacaaatgcccgcgatagggaacggctt : 800  
 r02\_C3 : agctacataccggaaaaaggaggatcagatcagcgctcccgccgaaaagcaggtcgtaacctgtacggcttcacaaatgcccgcgatagggaacggctt : 800  
**AGCTACATACCGGAAAAAGGGAGGATCAGATCAGCGCTCCCGCGCAAAAGCAGGTGTAACCTTGTACGGCTTCACAAATGCGGCGATAGGGACGGCTT**

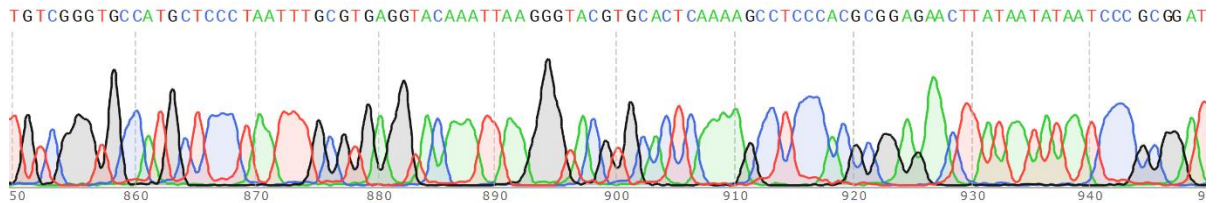

PCR\_C3 : tgtcgggtgccatgctccctaatttgcgtagggtacaaattaagggtacgtgcactcaaaagcctcccacgaggagaacttataatataatcccgggat : 900  
 r02\_C3 : tgtcgggtgccatgctccctaatttgcgtagggtacaaattaagggtacgtgcactcaaaagcctcccacgaggagaacttataatataatcccgggat : 900  
 TGTCTGGGTGCGCATGCTCCCTAATTTGCGGTGAGGTACAAATTAAAGGTACGTGCACTCAAAAGCCTCCACGCGGAGAACTTATAATATAATCCC GCGGAT

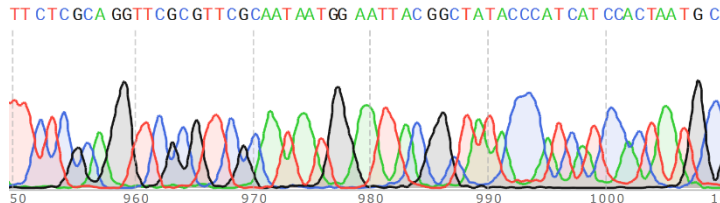

PCR\_C3 : ttctcgcaggttcgcttcgcaataatggaattacggctatacccatcatccactaatgc : 960  
 r02\_C3 : ttctcgcaggttcgcttcgcaataatggaattacggctatacccatcatccactaatgc : 960  
 TTCTCGCAGGTTCTGCGTTTCGCAATAATGGAATTACGGCTATACCCATCATCCACTAATGC

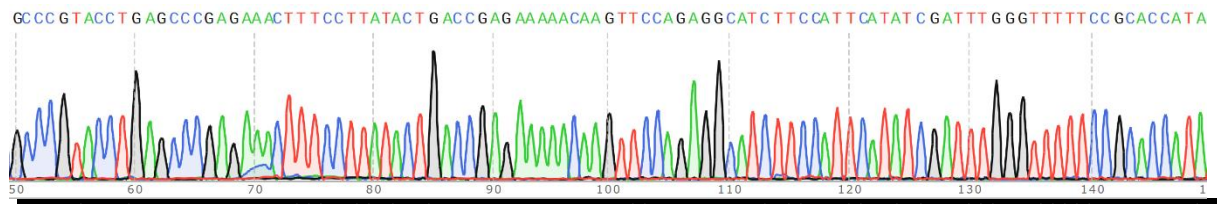

PCR\_C4 : gcccgtagctgagcccgagaaactttccttatactgaccgagaaaaacaagtccagaggcatcttccattcatatcgatttgggtttttccgcaccata :  
 100  
 r02\_C4 : gcccgtagctgagcccgagaaactttccttatactgaccgagaaaaacaagtccagaggcatcttccattcatatcgatttgggtttttccgcaccata :  
 100

GCCCGTACCTGAGCCGAGAAAC TTTCTTTACTG ACCGAGAAAAACAAGTTCAGAGGCATCTTCCATT CATATCGATT TGGGTTTTTCCGCACCATA

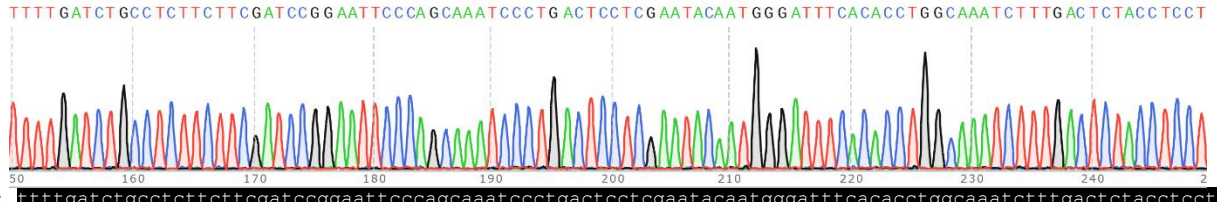

PCR\_C4 : ttttgatctgctcttcttcgatccggaattccagcaaattccctgactcctcgaatacaatgggatttcacacctggcaaattctttgactctacctcct :  
 200  
 r02\_C4 : ttttgatctgctcttcttcgatccggaattccagcaaattccctgactcctcgaatacaatgggatttcacacctggcaaattctttgactctacctcct :  
 200

TTTTGATCTGCCTCTTCTTCGATCCGGAATTCCAGCAAATCCCTGACTCCTCGAATACAATGGGATTTACACCTGGCAAATCTTTGACTCTACCTCCT

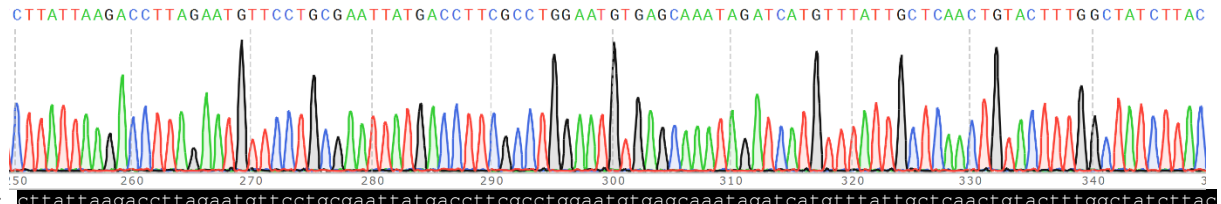

PCR\_C4 : cttattaagaccttagaatgttctctgcaattatgaccttcgcttgggaatgtgagcaaatagatcatgtttattgctcaactgtactttggctatcttac :  
 300  
 r02\_C4 : cttattaagaccttagaatgttctctgcaattatgaccttcgcttgggaatgtgagcaaatagatcatgtttattgctcaactgtactttggctatcttac :  
 300

CTTATTAAGACCTTAGAATGTTCTCTGCGAATTATGACCTTCGCC TGG AATGTGA GCAAA TAGATCATGTTTATTGCTCAACTGTACTTTGGCTATCTTAC

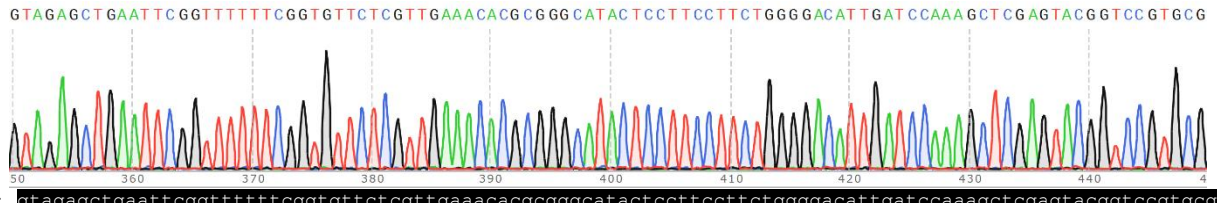

PCR\_C4 : gtagagctgaattcgggttttttcgggtgttctcgttgaaacacgcgggcatactccttccttctggggacattgatccaagctcgagtacgggtccgtgcg :  
 400  
 r02\_C4 : gtagagctgaattcgggttttttcgggtgttctcgttgaaacacgcgggcatactccttccttctggggacattgatccaagctcgagtacgggtccgtgcg :  
 400

GTAGAGCTGAATTCTGGTTTTTTCGGTGTCTCGTTGAAACACGCGGGCATACTCCTTCCTTCTGGGGACATTGATCCAAGCTCGAGTACGGTCCGTGCG

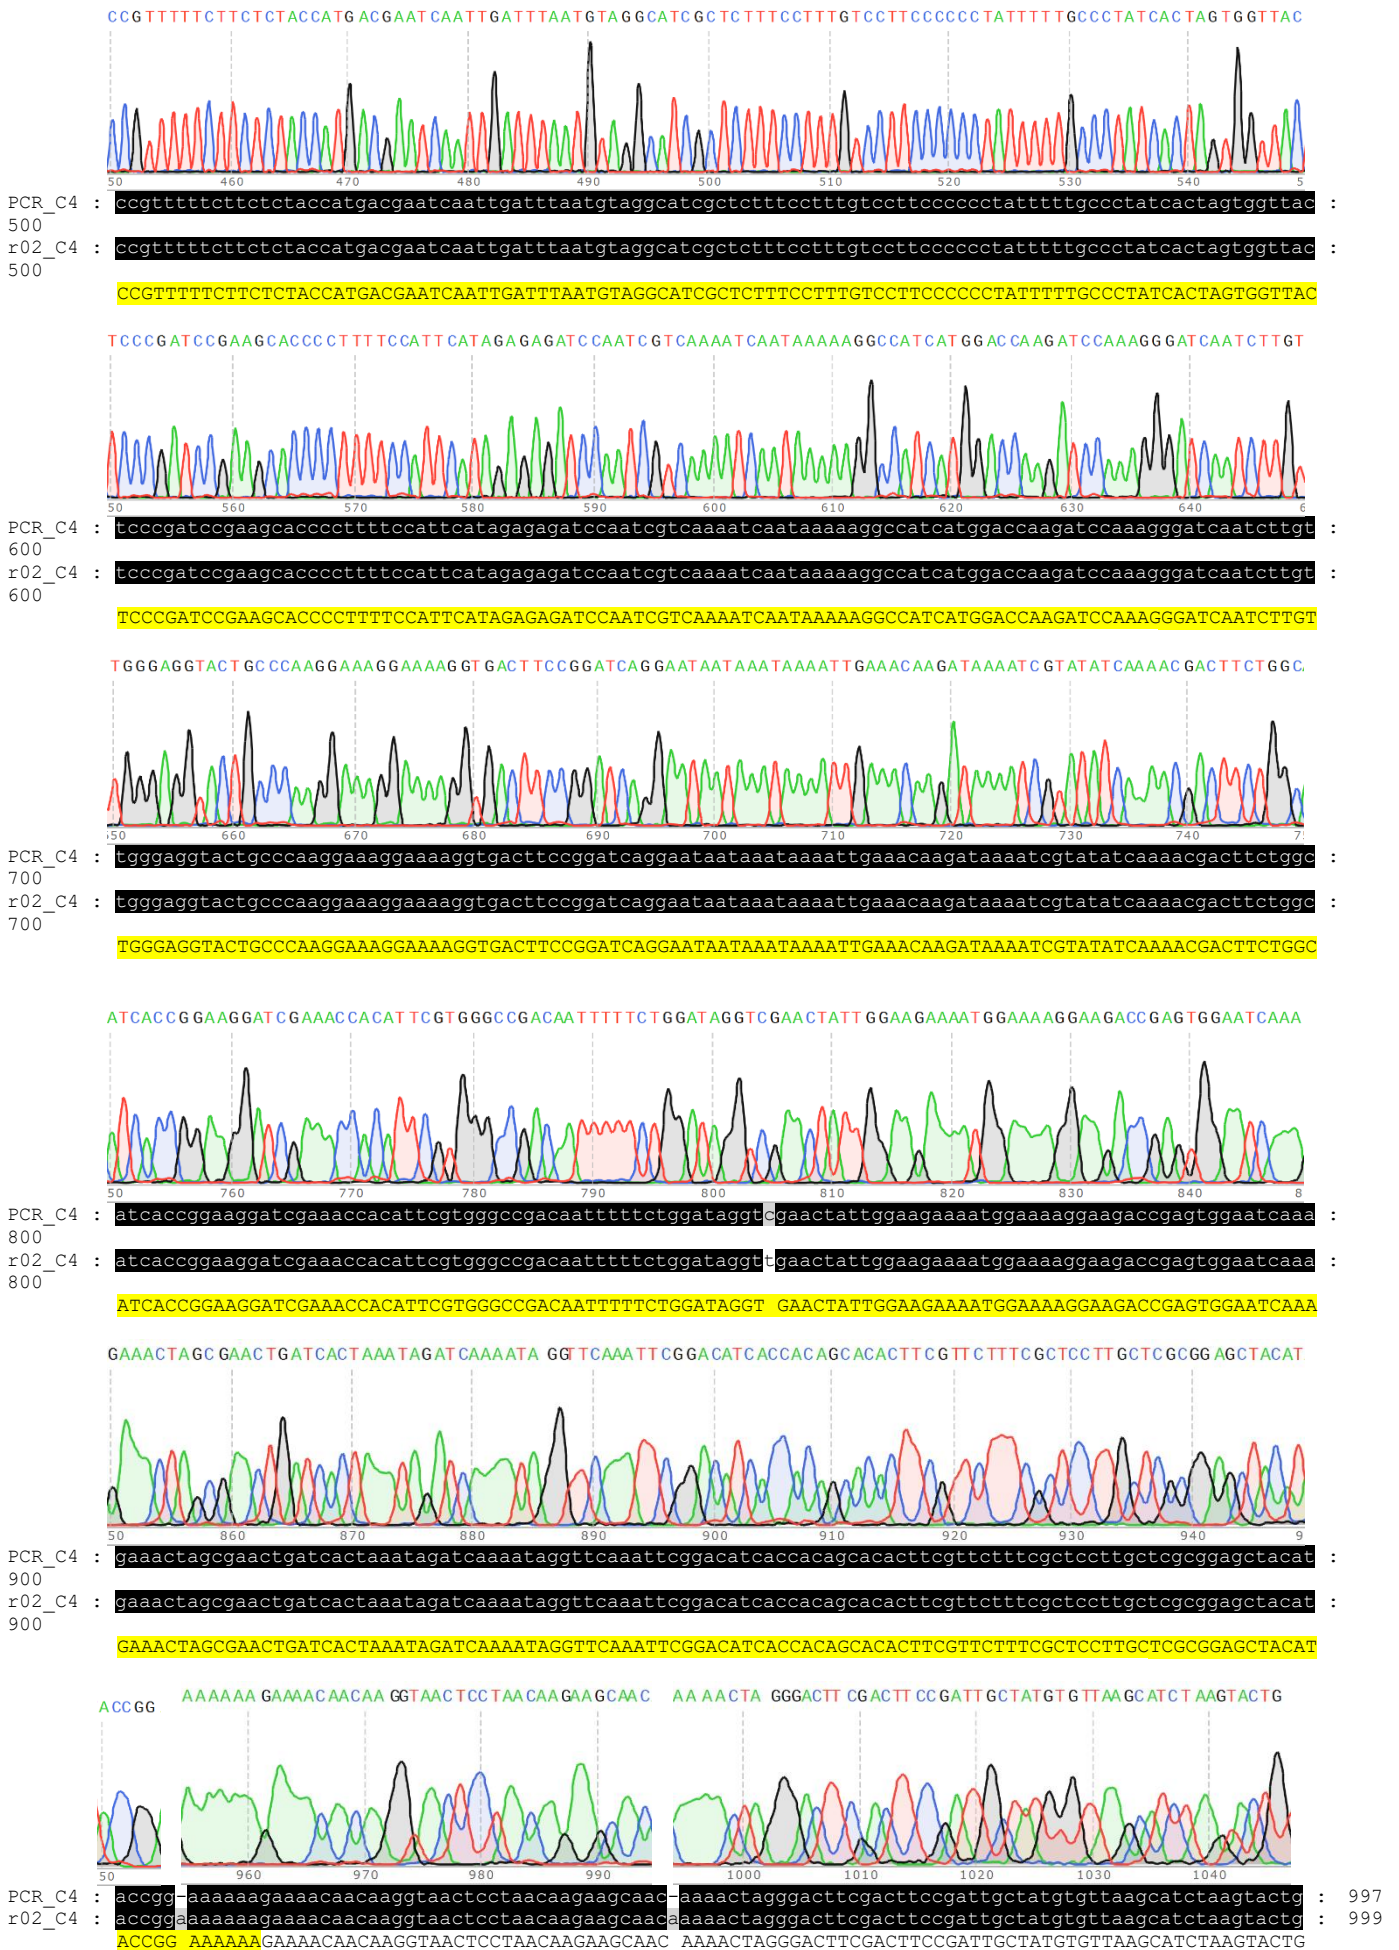



C

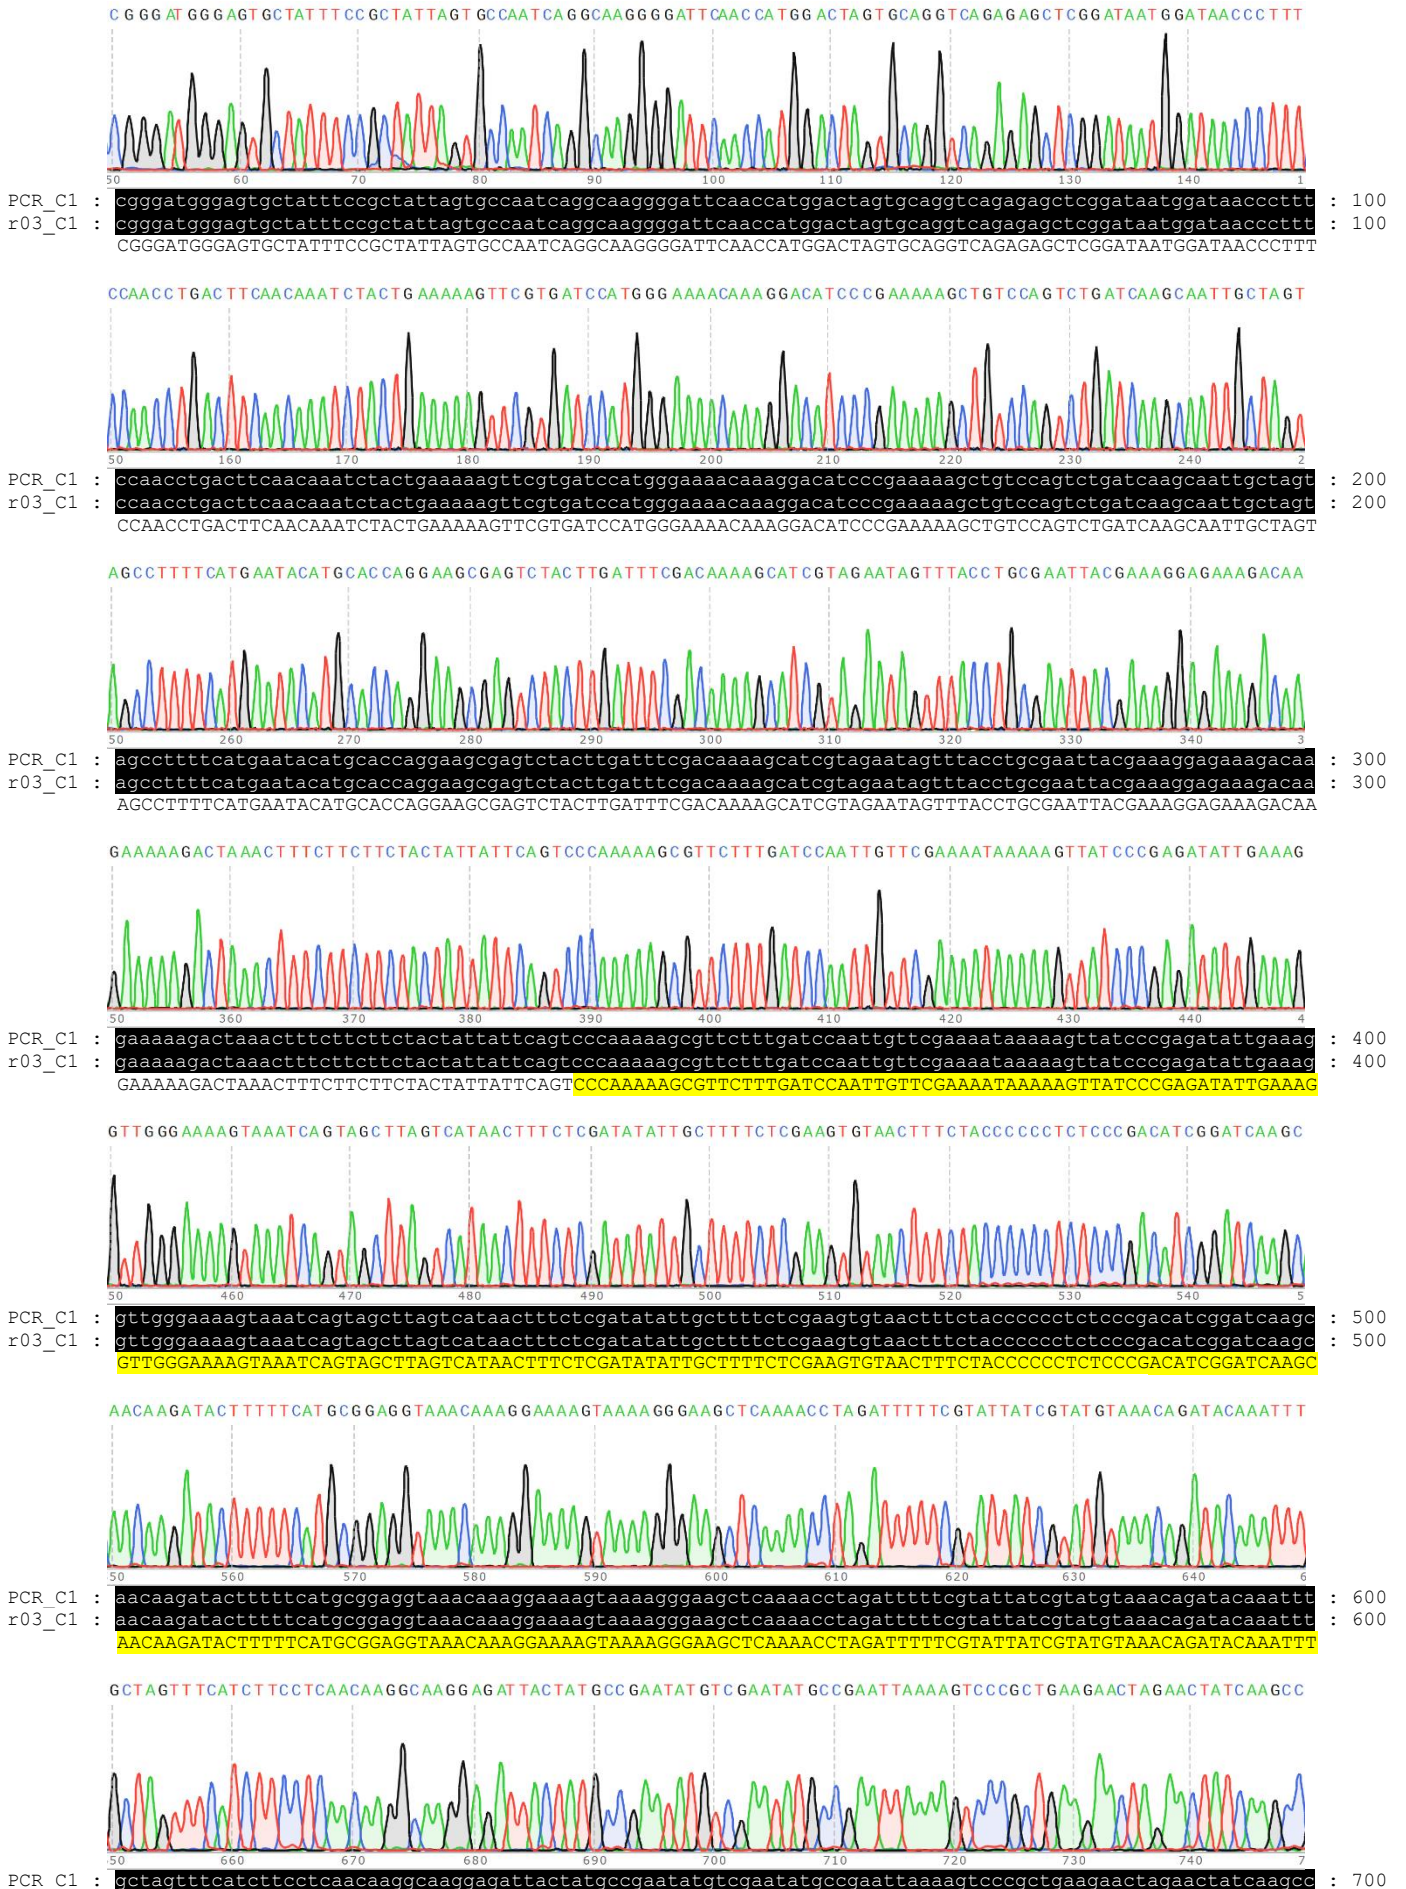

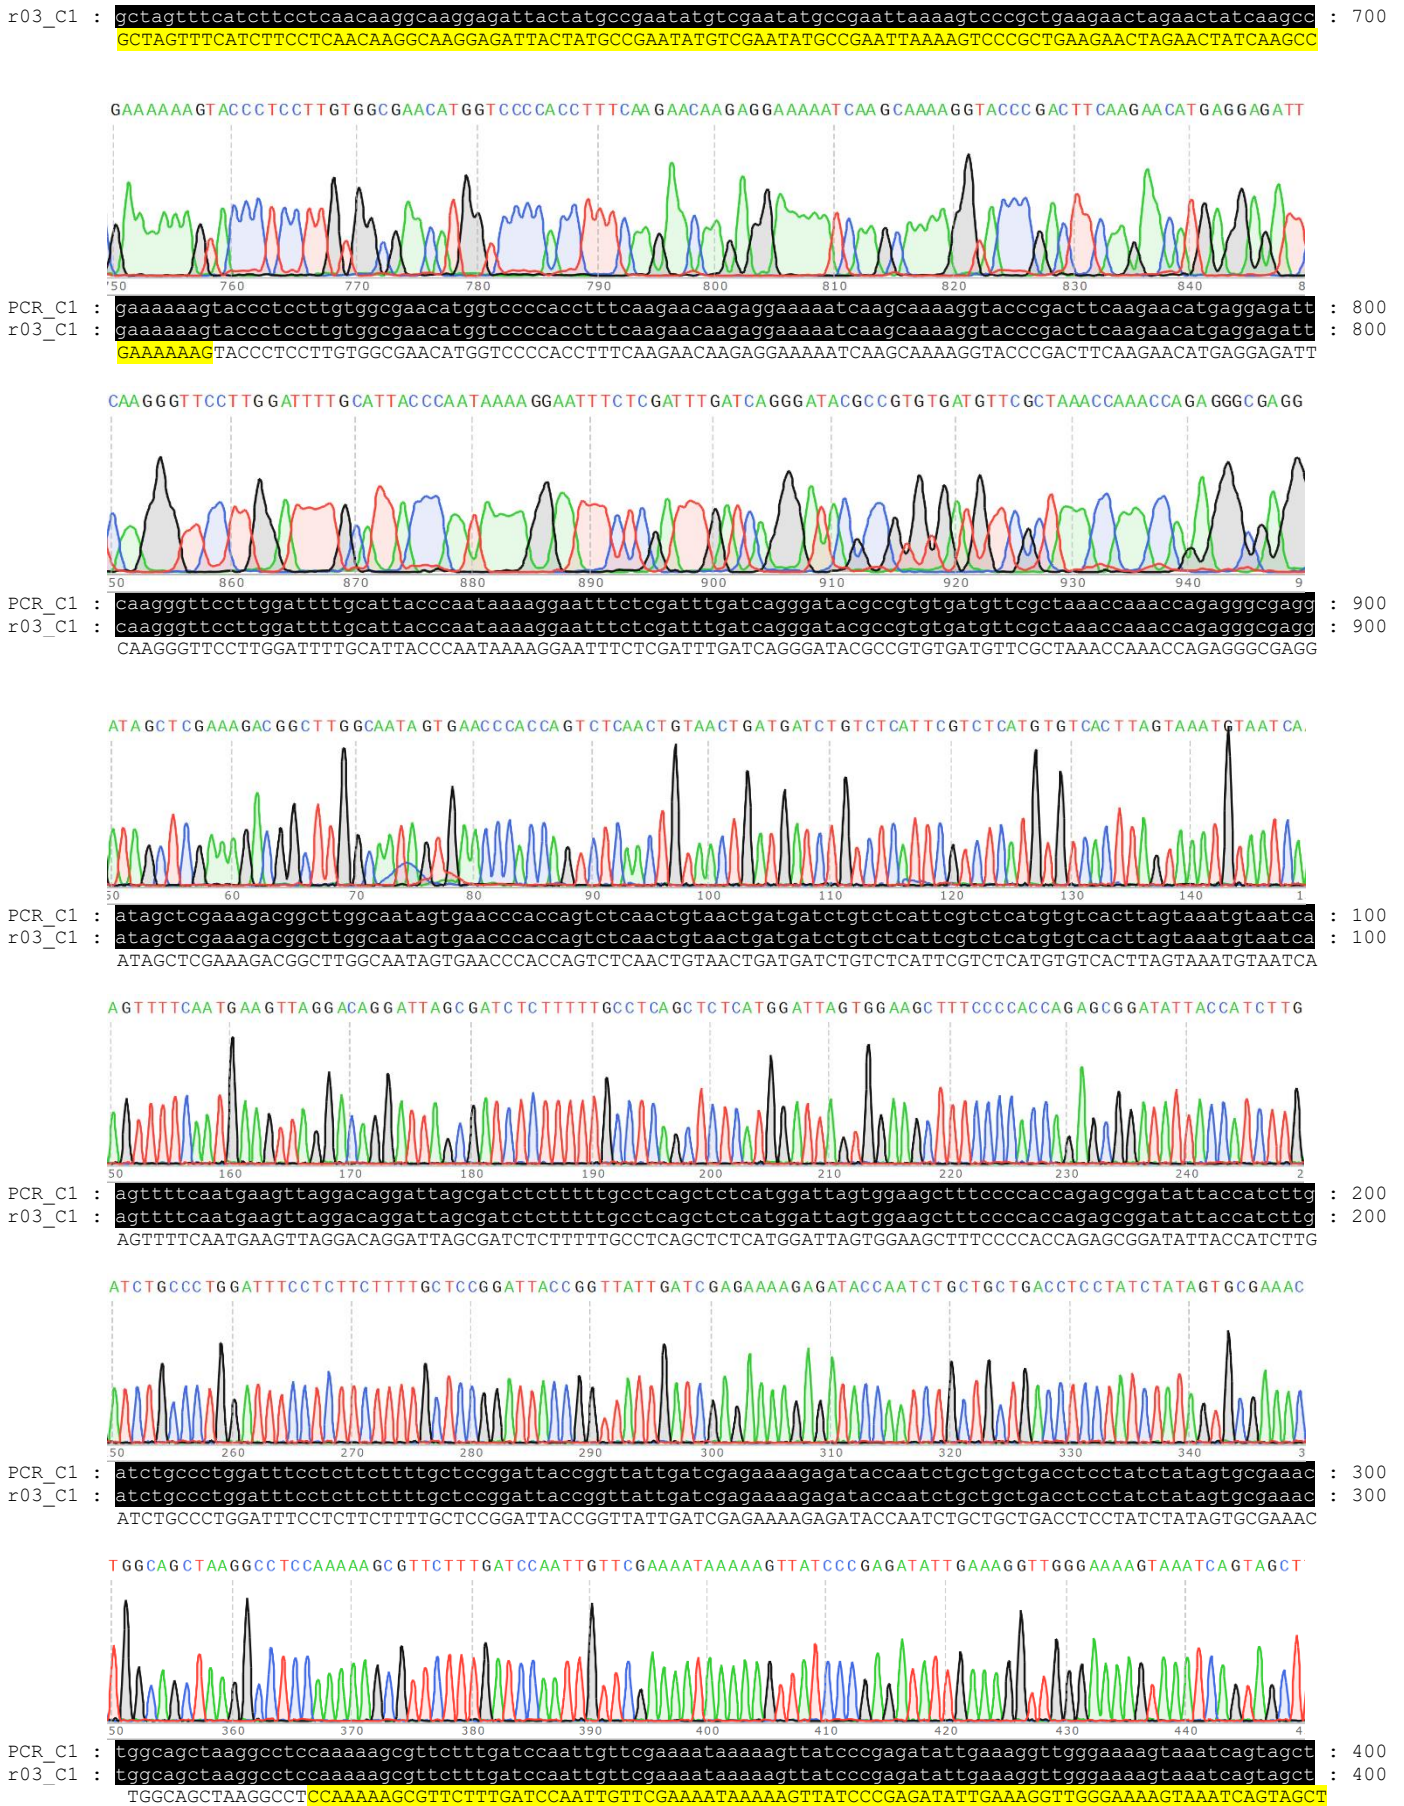



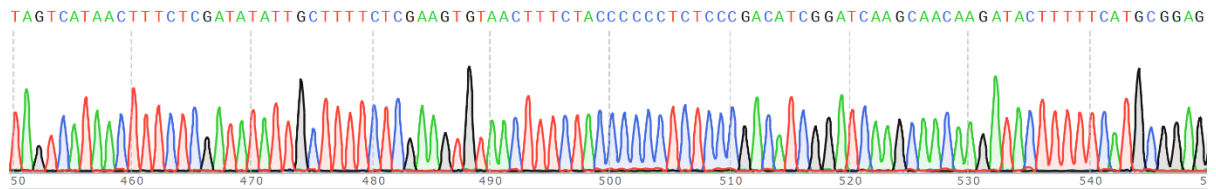

PCR\_C2 : tagtcataacttttctcgatatattgcttttctcgaagtgttaactttctacccctctcccgacatcggatcaagcaacaagatactttttcatgcgagg : 500  
 r03\_C2 : tagtcataacttttctcgatatattgcttttctcgaagtgttaactttctacccctctcccgacatcggatcaagcaacaagatactttttcatgcgagg : 500  
**TAGTCATAACTTTCTCGATATATTGCTTTTCTCGAAGTGTAACTTTCTACCCCTCTCCGACATCGGATCAAACAAGATACTTTTCATGCGGAG**

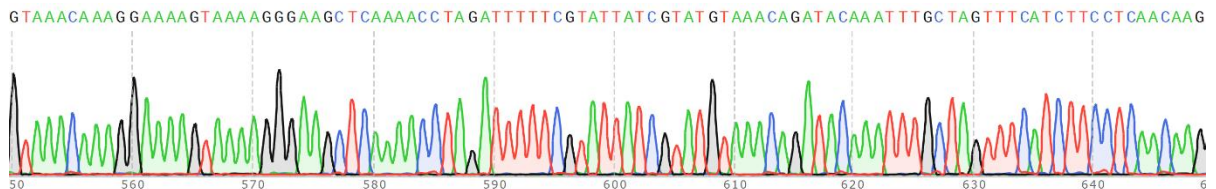

PCR\_C2 : gtaaacaaaggaaaagttaaagggaagctcaaaacctagatttttctgattatcgatgtaaacagatacaaatgtctagtttcatcttctcaacaag : 600  
 r03\_C2 : gtaaacaaaggaaaagttaaagggaagctcaaaacctagatttttctgattatcgatgtaaacagatacaaatgtctagtttcatcttctcaacaag : 600  
**GTAAACAAGGAAAAGTAAAAGGGAAGCTCAAAACCTAGATTTTTCGTATTATCGTATGTAAACAGATACAAATTTGCTAGTTTCATCTTCCTCAACAAG**

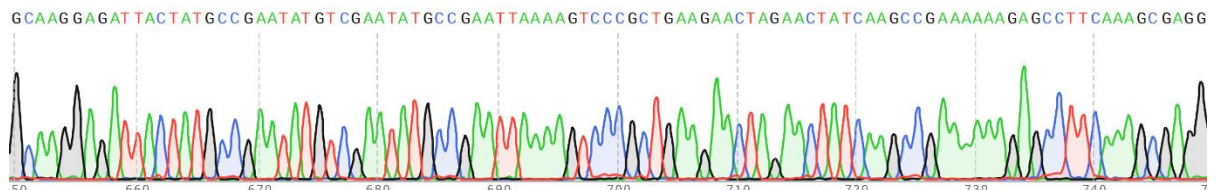

PCR\_C2 : gcaaggagattactatgccgaatatgtcgaatatgcgaattaaaagtcccgctgaagaactagaactatcaagccgaaaaaagagccttcaagcgagg : 700  
 r03\_C2 : gcaaggagattactatgccgaatatgtcgaatatgcgaattaaaagtcccgctgaagaactagaactatcaagccgaaaaaagagccttcaagcgagg : 700  
**GCAAGGAGATTACTATGCCGAATATGTGCAATATGCCGAATTAAAAGTCCCGCTGAAGAACTAGAACTATCAAGCCGAAAAAGAGCCTTCAAGCGAGG**

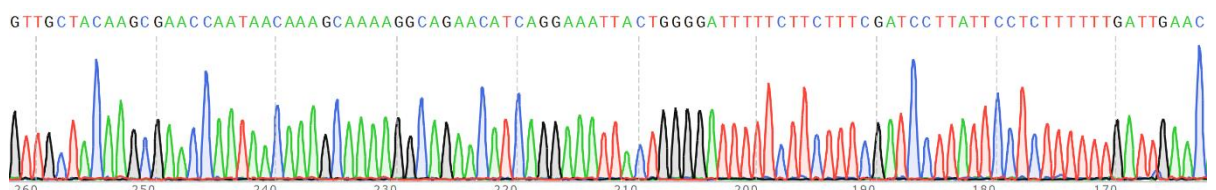

PCR\_C2 : gttgctacaagcgaaccaataacaaagcaaaaggcagaacatcaggaaattactggggatttttcttcttcttcgatccttattcctctttttgattgaac : 800  
 r03\_C2 : gttgctacaagcgaaccaataacaaagcaaaaggcagaacatcaggaaattactggggatttttcttcttcttcgatccttattcctctttttgattgaac : 800  
**GTTGCTACAAGCGAACCAATAACAAA GCAAAAAGGCAAGAACATCAGGAATTA CTGGGGATTTTCTTTCTTCGATCCTTATTCCTCTTTTTGATTGAAC**

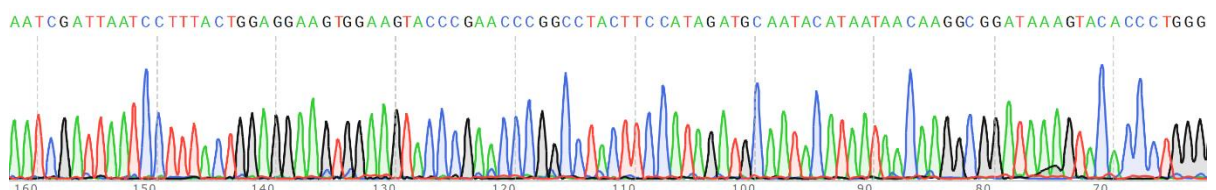

PCR\_C2 : aatcgattaatcctttactggaggaagtgggaagtacccgaacccggcctacttccatagatgcaatacataataacaaggcgataaagtaacacctggg : 900  
 r03\_C2 : aatcgattaatcctttactggaggaagtgggaagtacccgaacccggcctacttccatagatgcaatacataataacaaggcgataaagtaacacctggg : 900  
**AATCGATTAATCCTTTACTGGAAGGAA GTGAAGTACCCGAACCCGGCCTACTTTCATAGATGCAATACATAATAACAAGGCGGATAAAGTACACCC TGGG**

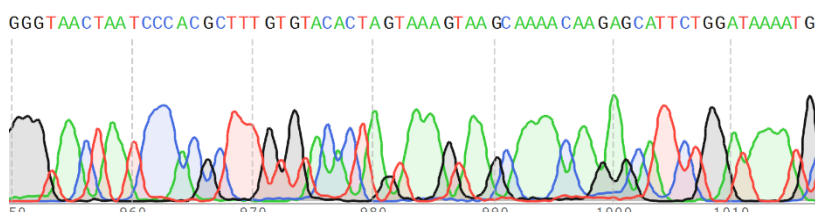

PCR\_C2 : gggtaactaatcccacgctttgtgtacactagtaaaagtaagcaaaacaagagcattctggataaaatg : 968  
 r03\_C2 : gggtaactaatcccacgctttgtgtacactagtaaaagtaagcaaaacaagagcattctggataaaatg : 968  
**GGGTAACATAATCCACGCTTTGTGTACACTAGTAAAGTAAGCAAAACAAGAGCATTCTGGATAAAATG**

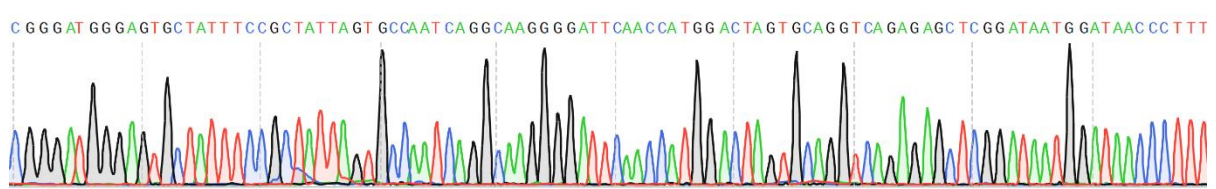

PCR\_C3 : cgggatgggagtgctattttccgctatttagtgccaatcaggcaaggggattcaaccatggactagtgcaaggtcagagagctcggataatggataacccctt : 100  
 r03\_C3 : cgggatgggagtgctattttccgctatttagtgccaatcaggcaaggggattcaaccatggactagtgcaaggtcagagagctcggataatggataacccctt : 100  
**CGGGATGGGAGTGCTATTTCCGCTATTAGTGCCAATCAGGCAAGGGGATTCAACCATGGACTAGTGCAGGTCAAGAGGCTCGGATAATGGATAACCC TTT**



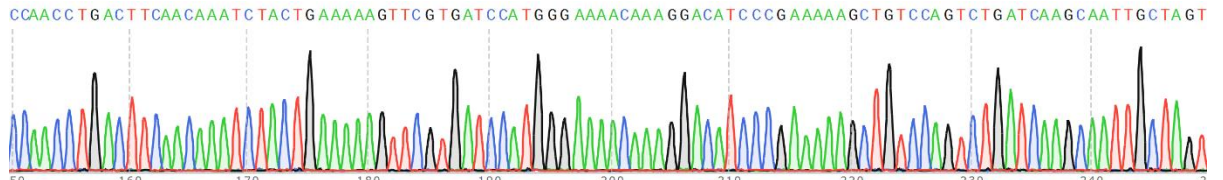

PCR\_C3 : ccaacctgacttcaacaaatctactgaaaaagttcgtgatccatgggaaaacaaaggacatcccgaaaaagctgtccagtctgatcaagcaattgctagt : 200  
r03\_C3 : ccaacctgacttcaacaaatctactgaaaaagttcgtgatccatgggaaaacaaaggacatcccgaaaaagctgtccagtctgatcaagcaattgctagt : 200  
CCAACCTGACTTCAACAAATCTACTGAAAAAGTTCTGATCCATGGGAAAACAAAGGACATCCCGAAAAAGCTGTCCAGTCTGATCAAGCAATTGCTAGT

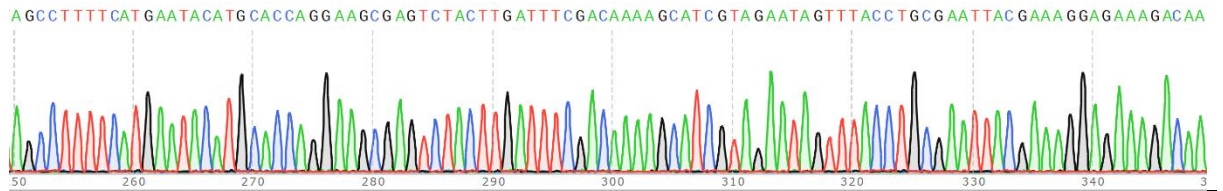

PCR\_C3 : agccttttcatgaatacatgcaccaggaagcgagtcacttgatttcgacaaaagcatcgtagaatagtttacctgcgaattacgaaaggagaaagacaa : 300  
r03\_C3 : agccttttcatgaatacatgcaccaggaagcgagtcacttgatttcgacaaaagcatcgtagaatagtttacctgcgaattacgaaaggagaaagacaa : 300  
AGCCTTTTCATGAATACATGCACCAGGAAGCGAGTCTACTTGATTTTGACAAAAGCATCGTAGAATAGTTTACCTGCGAATTACGAAAGGAGAAAGACAA

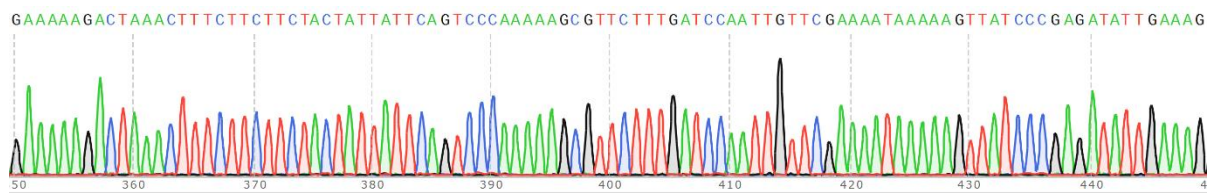

PCR\_C3 : gaaaaagactaaacttttcttcttctactattattcagtcacaaaagcgttctttgatccaatgttcgaaaaataaaaagttatcccgagatattgaaag : 400  
r03\_C3 : gaaaaagactaaacttttcttcttctactattattcagtcacaaaagcgttctttgatccaatgttcgaaaaataaaaagttatcccgagatattgaaag : 400  
GAAAAAGACTAAACTTTCTTCTTCTACTATTATTCAAGTCCCAAAAAGCGTTCTTTGATCCAAATTGTTTCGAAAATAAAAAGTTATCCCGAGATATTGAAAG

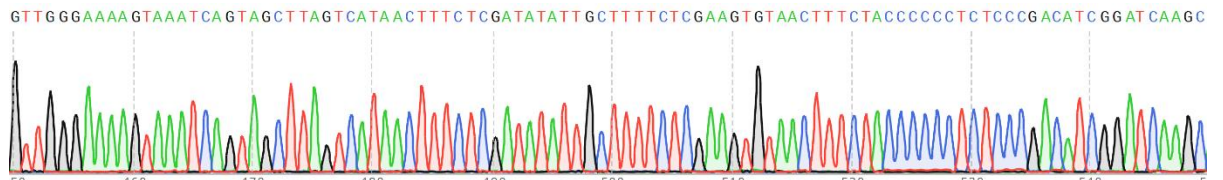

PCR\_C3 : gttgggaaaagtaaatcagtagcttagtcataactttctcgatatattgcttttctcgaagtgttaactttctacccccctctcccgacatcggatcaagc : 500  
r03\_C3 : gttgggaaaagtaaatcagtagcttagtcataactttctcgatatattgcttttctcgaagtgttaactttctacccccctctcccgacatcggatcaagc : 500  
GTTGGGAAAAGTAAATCAGTAGCTTAGTCATAACTTTCTCGATATATTGCTTTTCTCGAAGTGTAACCTTTCTACCCCTCTCCCGACATCGGATCAAGC

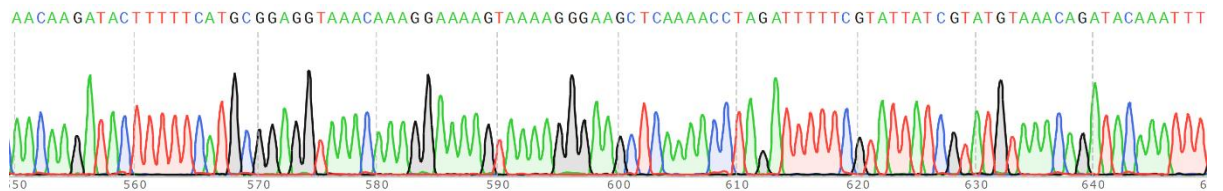

PCR\_C3 : aacaagatactttttcatgcgagggttaacaaaggaaaagtaaaagggaagctcaaaacctagatttttcgtattatcgtagtaaacagatacaaat : 600  
r03\_C3 : aacaagatactttttcatgcgagggttaacaaaggaaaagtaaaagggaagctcaaaacctagatttttcgtattatcgtagtaaacagatacaaat : 600  
AACAAAGATACTTTTTCATGCGGAGGTAACAAAGGAAAAGTAAAGGGAAGCTCAAAACCTAGATTTTTCGTATTATCGTAGTAACAGATACAAATTT

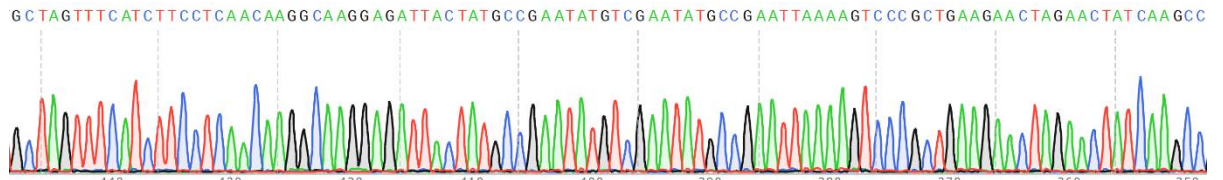

PCR\_C3 : gctagtttcatcttctcaacaaggcaaggagattactatgccgaatatgtcgaatatgccgaattaaaagtcgccgtgaagaactagaactatcaagcc : 700  
r03\_C3 : gctagtttcatcttctcaacaaggcaaggagattactatgccgaatatgtcgaatatgccgaattaaaagtcgccgtgaagaactagaactatcaagcc : 700  
GCTAGTTTCATCTTCTCAACAAAGGCAAGGAGATTCTATGCCGAATATGTCGAATATGCCGAATATAAAAGTCCCGCTGAAGAACTAGAACTATCAAGCC

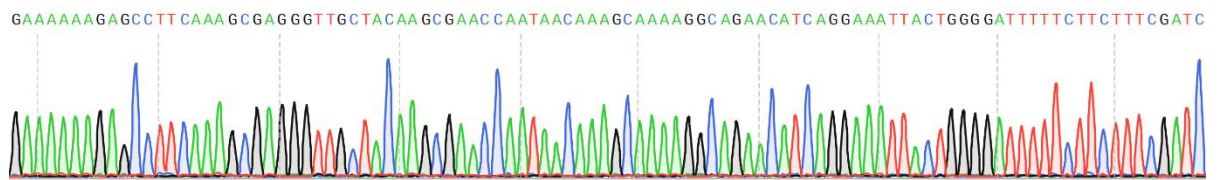

PCR\_C3 : gaaaaagagccttcaaaagcgagggtgtgtacaagcgaaccaataacaaagcaaaaggcagaacatcaggaaattactggggattttcttcttcgatc : 800  
r03\_C3 : gaaaaagagccttcaaaagcgagggtgtgtacaagcgaaccaataacaaagcaaaaggcagaacatcaggaaattactggggattttcttcttcgatc : 800  
GAAAAAGAGCCTTCAAAAGCGAGGGTGTACAAAGCAACCAATAACAAAGCAAAAGGCGAAGCAATCAGGAAATTACTGGGGATTCTTCTTTCGATC

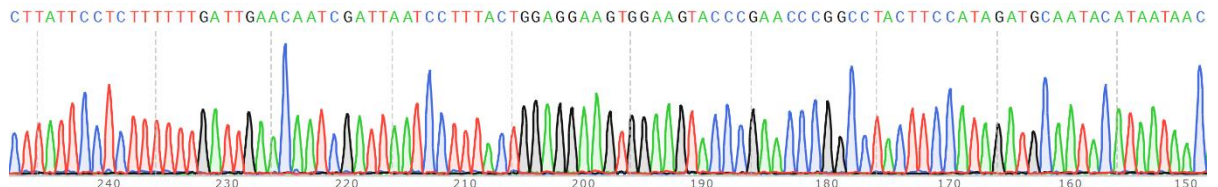

PCR\_C3 : cttattcctcttttttgattgaacaatcgattaatcctttactggagggaagtggaagtacccgaacccggcctacttccatagatgcaatacataataac : 900  
 r03\_C3 : cttattcctcttttttgattgaacaatcgattaatcctttactggagggaagtggaagtacccgaacccggcctacttccatagatgcaatacataataac : 900  
 CTTATTCTCTTTTTGATTGAACAATCGATTAATCCTTTACTGGAGGAA GTGGAAGTACCCGAACCCG GCC TACTTC CATAGATGCAATACATAATAAC

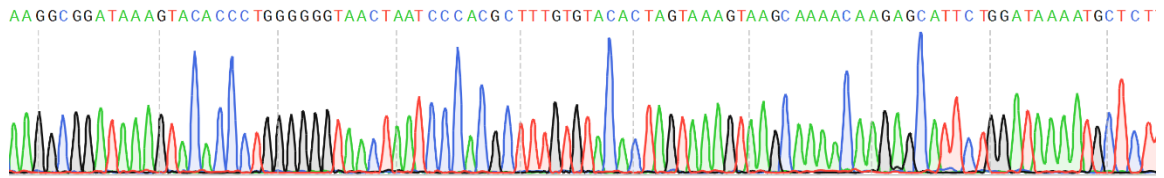

PCR\_C3 : aaggcggataaagtacaccctgggggtaactaatcccacgctttgtgtacactagttaaagtaagcaaaacaagagcattctggataaaatgctct : 994  
 r03\_C3 : aaggcggataaagtacaccctgggggtaactaatcccacgctttgtgtacactagttaaagtaagcaaaacaagagcattctggataaaatgctct : 996  
 AAGGCGGATAAAGTACACCC TGGGGGGTAAC TAATCCCACGCTTTGTGTACACTAGTAAAGTAAGC AAAACAAGAGCATTCTGGATAAAATGCTCT

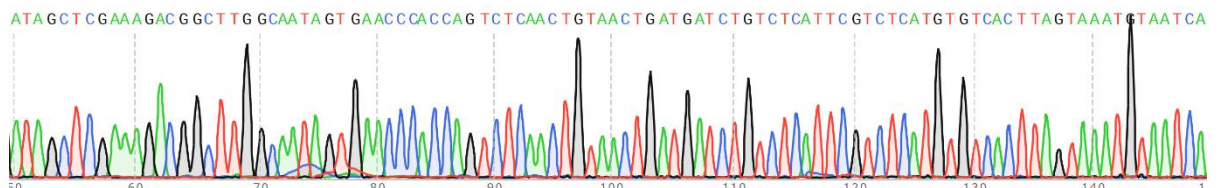

r03\_C4 : atagctcgaagacggccttggaatagtgaaacccaccagctctcaactgtaactgatgatctgtctcattcgctcattgtgtcacttagtaaatgtaatca : 100  
 PCR\_C4 : atagctcgaagacggccttggaatagtgaaacccaccagctctcaactgtaactgatgatctgtctcattcgctcattgtgtcacttagtaaatgtaatca : 100  
 ATAGCTCGAAAGACGGCTTGGAATAGTGAACCCACCAGTCTCAACTGTAAC TGATGATCTGTCTCATTCTCATGTGTCACTTAGTAATTAATCA

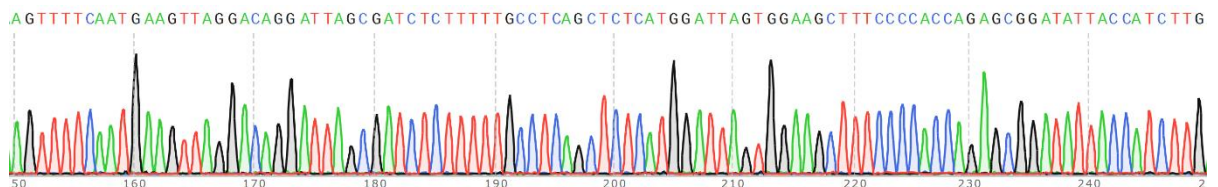

r03\_C4 : agttttcaatgaagtttaggacaggattagcgatctctttttgcctcagctctcatggattagtggaaagctttccccaccagagcggatattaccatcttg : 200  
 PCR\_C4 : agttttcaatgaagtttaggacaggattagcgatctctttttgcctcagctctcatggattagtggaaagctttccccaccagagcggatattaccatcttg : 200  
 AGTTTCAATGAAGTTAGGACAGGATTAGCGATCTCTTTTGCCTCAGCTCTCATGGATTAGTGGAAGCTTTCCCCACCA GAGCGGATATTACCATCTTG

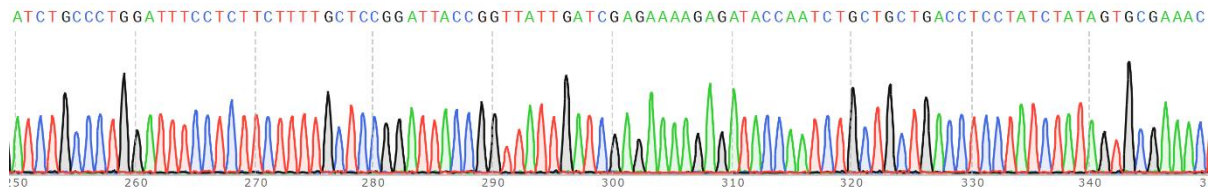

r03\_C4 : atctgccttggaatttcctctctttttgctccggattaccgggttatgtatcgagaaaagagataccaatctgctgctgacctcctatctatagtgcgaaac : 300  
 PCR\_C4 : atctgccttggaatttcctctctttttgctccggattaccgggttatgtatcgagaaaagagataccaatctgctgctgacctcctatctatagtgcgaaac : 300  
 ATCTGCCCTGGATTTCCTCTCTTTTGTCTCCGATTACCGGTTATTGATCGAGAAAAGAGATACCAATCTGCTGCTGACCTCCTATCTATAGTGC GAAAC

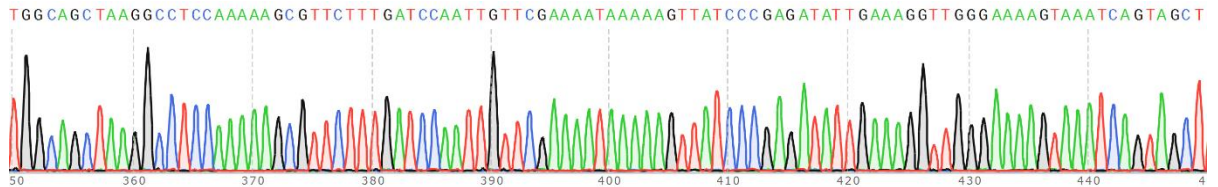

r03\_C4 : tggcagctaaggcctccaaaaagcgcttctttgatccaattgttcgaaaaataaaaagttatcccgagatattgaaaggttgggaaaagtaaatcagtagct : 400  
 PCR\_C4 : tggcagctaaggcctccaaaaagcgcttctttgatccaattgttcgaaaaataaaaagttatcccgagatattgaaaggttgggaaaagtaaatcagtagct : 400  
 TGGCAGCTAAGGCTTCCAAAAAGCGTTCTTTGATCCAATTGTTTGGAAAATAAAAAGTTATCCCGAGATATTGAAAGGTTGGG AAAAGTAAATCAGTAGCT

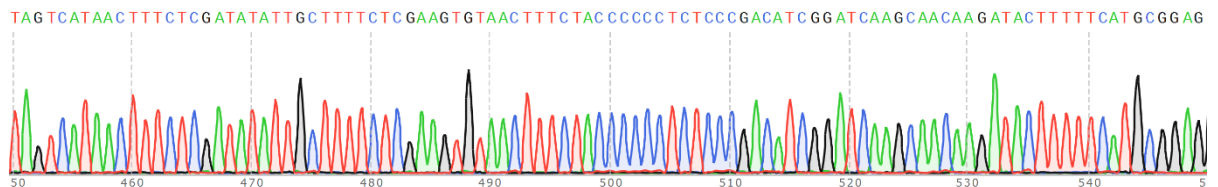

r03\_C4 : tagtcataactttctcgatatattgcttttctcgaagtgtactttctacccccctctcccgacatcggatcaagcaacaagatactttttcatgcgag : 500  
 PCR\_C4 : tagtcataactttctcgatatattgcttttctcgaagtgtactttctacccccctctcccgacatcggatcaagcaacaagatactttttcatgcgag : 500  
 TAGTCATAACTTTCTCGATATTGCTTTTCTCGAAGTGTAACTTTCTACCCCTCTCCCGACATCGGATCAAGCAACAAGATACTTTTCATGCGGAG



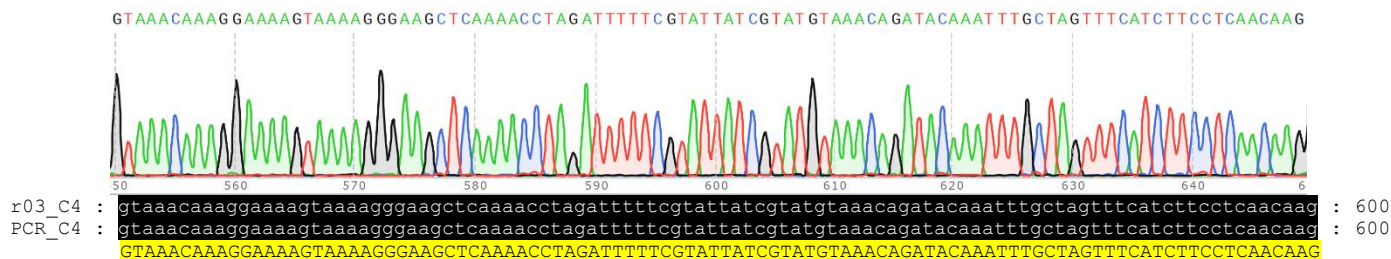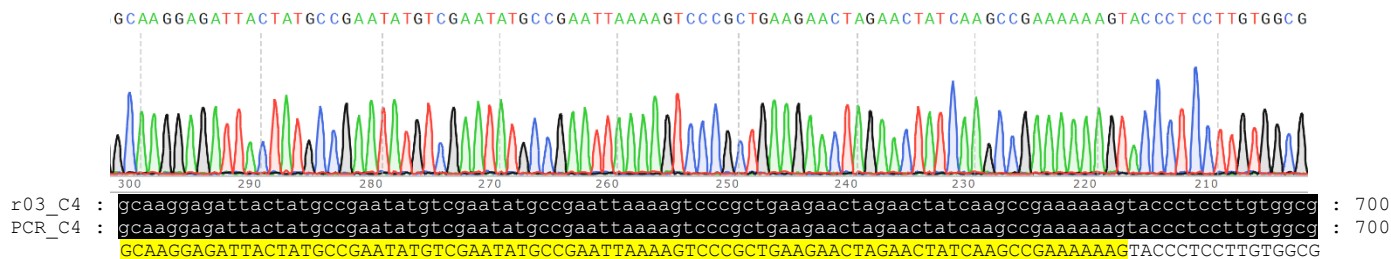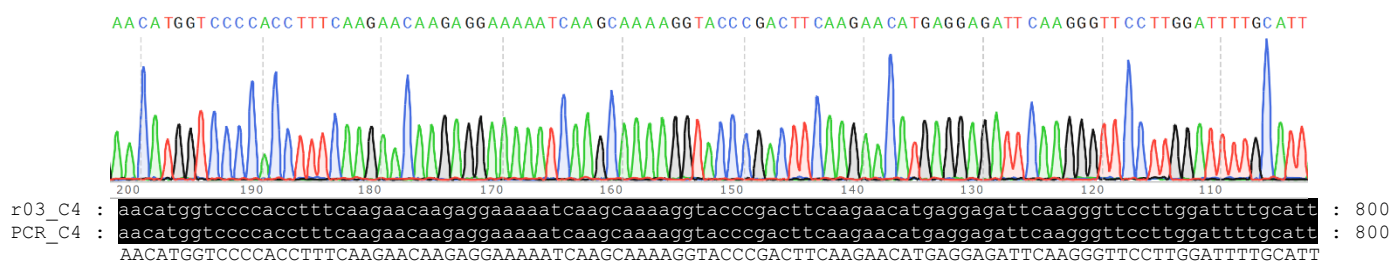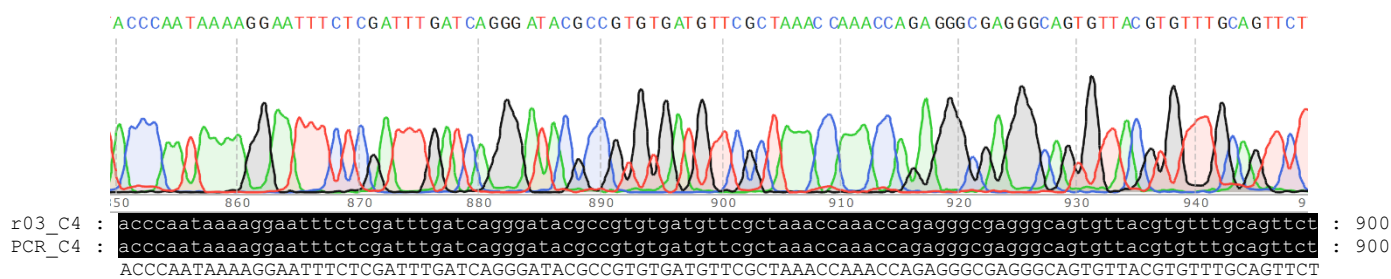

d

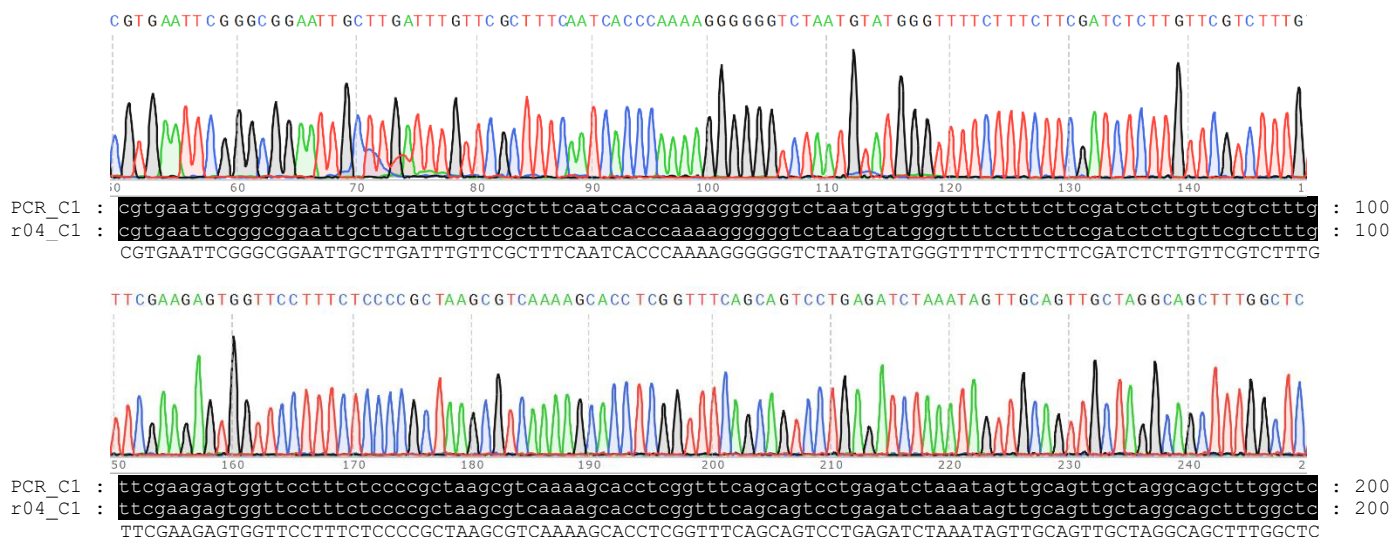





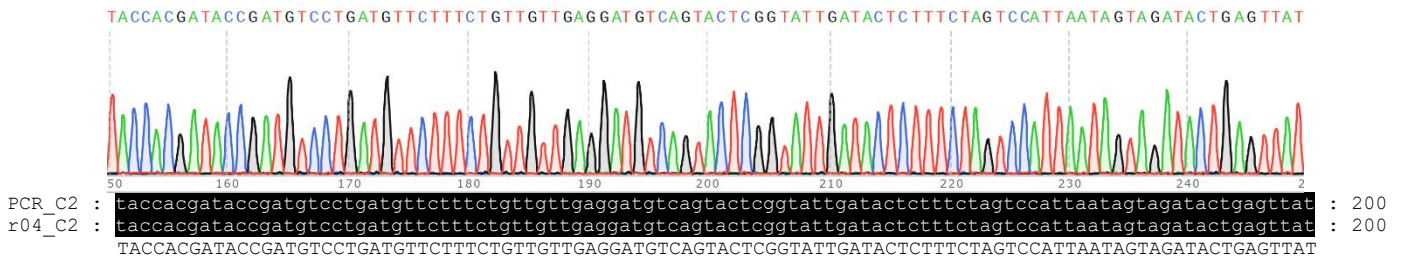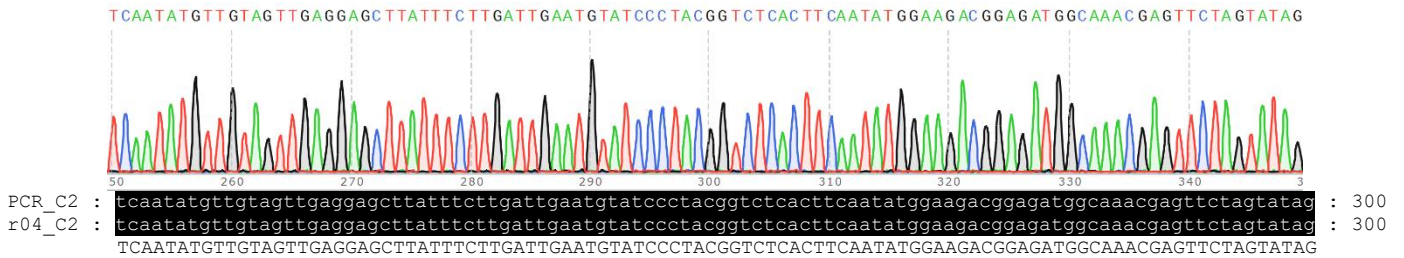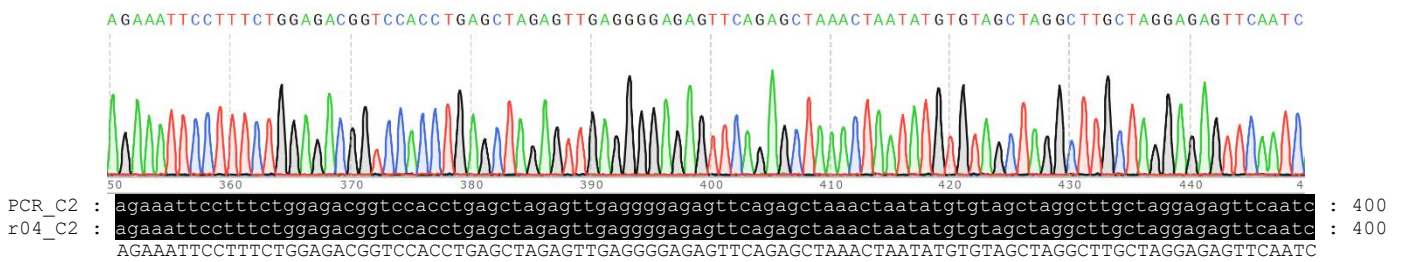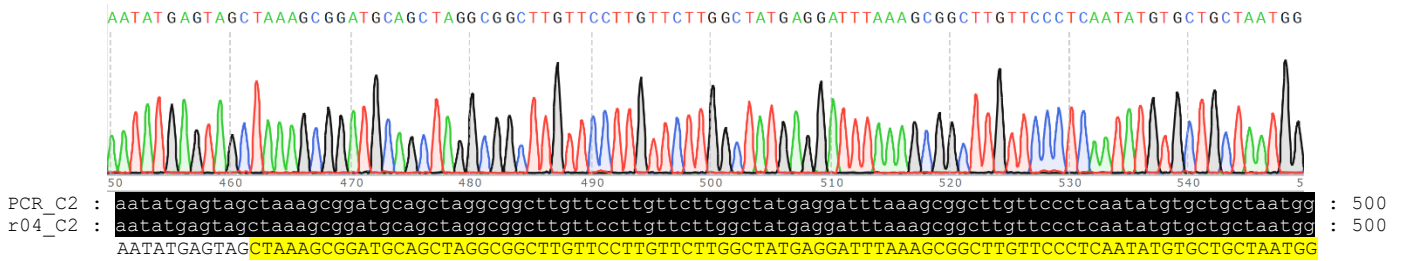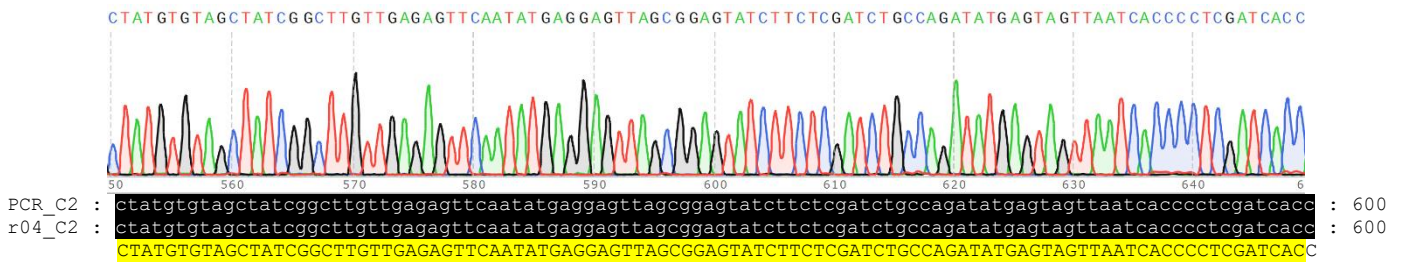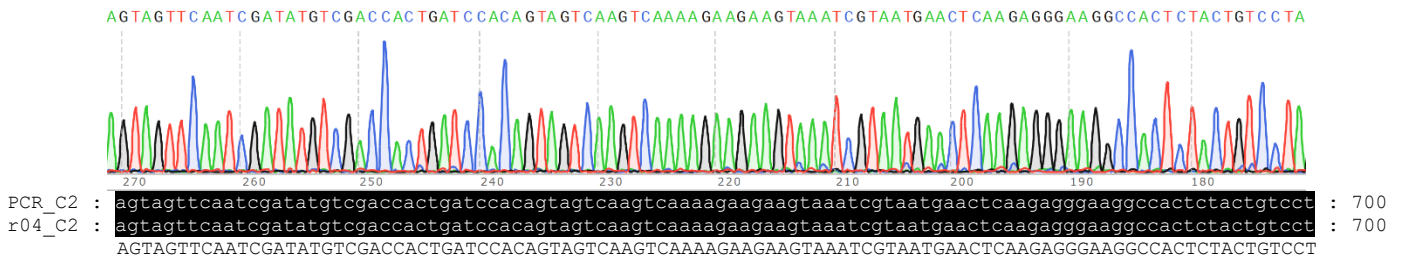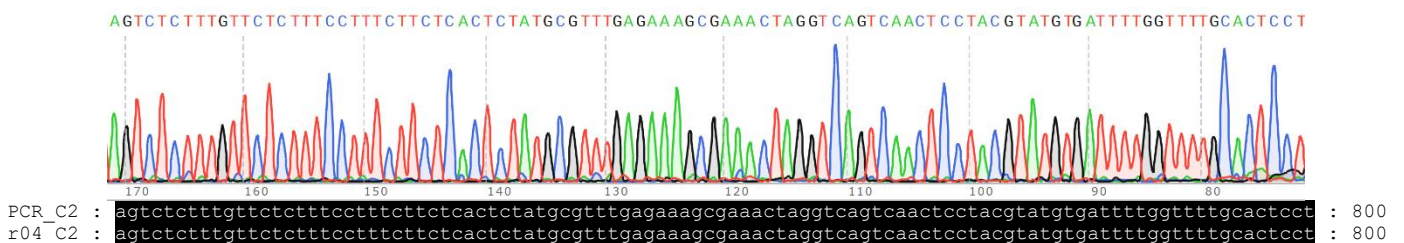



AGTCTCTTTGTTCTCTTTCTTTCTTCTCACTCTATGCGTTTGAGAAAGCGAACTAGGTGAGTCAACTCCTACGTATGTGATTTTGGTTTGCACCTCT

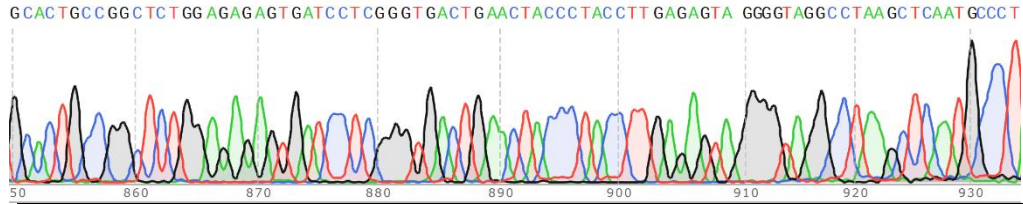

PCR\_C2 : gcactgcccgcctctggagagagtgatecctcgggtgactgaactaccctaccttgagagttagggtaggcctaagctcaatgccct : 885  
r04\_C2 : gcactgcccgcctctggagagagtgatecctcgggtgactgaactaccctaccttgagagttagggtaggcctaagctcaatgccct : 885  
GCACTGCCGGCTCTGGAGAGAGTGATCCTCGGGTGACTGAAC TACCC TACCTT GAGAGTAGGGTAGGCCTAAGCTCAATGCCCT

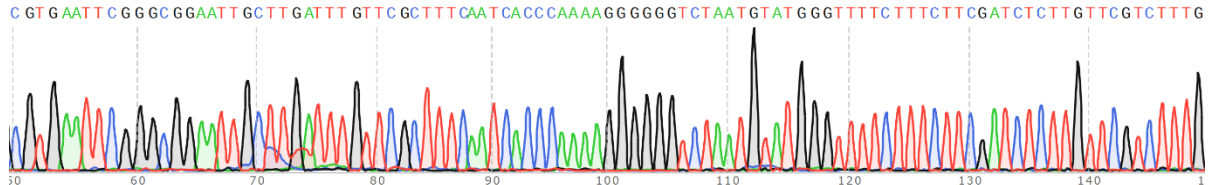

PCR\_C3 : cgtgaattcgggcggaattgcttgatttgctcgcttcaatcacccaaaaggggggtcctaatgtatgggtttctttcttcgatctcttgctcgtcttg : 100  
r04\_C3 : cgtgaattcgggcggaattgcttgatttgctcgcttcaatcacccaaaaggggggtcctaatgtatgggtttctttcttcgatctcttgctcgtcttg : 100  
CGTGAATTCGGGCGGAATTGCTT GATTT GTTCGTTTCAATCACCAGAAAGGGGGTCTAATGTATGGTTTTCTTTCTTCGATCTCTTGTTCTTTG

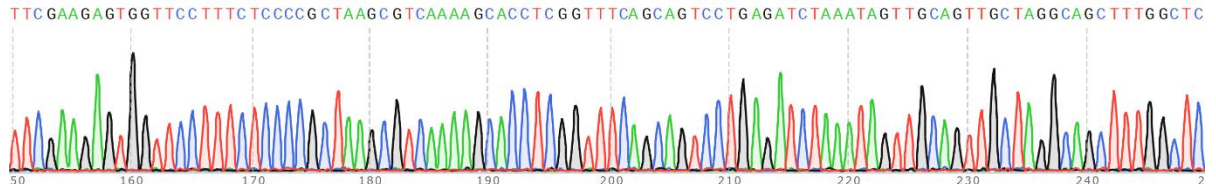

PCR\_C3 : ttccaagagtgggttcctttctcccgctaaagcgtcaaaagcacctcggtttcagcagtcctgagatcctaaatagttgcagttgctaggcagctttggctc : 200  
r04\_C3 : ttccaagagtgggttcctttctcccgctaaagcgtcaaaagcacctcggtttcagcagtcctgagatcctaaatagttgcagttgctaggcagctttggctc : 200  
TTCGAAGAGTGTTCTTTCTCCCGCTAAGCGTCAAAAGCACCTCGGTTTCAAGCAGTCTGAGATCTAAATAGTTGAGTTGCTAGGCAAGCTTTGGCTC

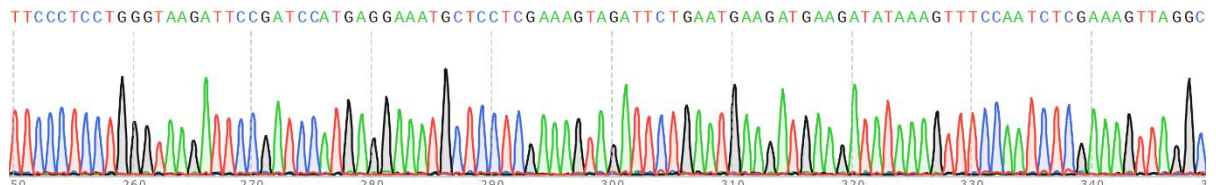

PCR\_C3 : ttccctcctgggtaagattccgatccatgaggaaatgctcctcgaaagtagattctgaatgaagatgaagatataaagtttccaatctcgaaagttaggg : 300  
r04\_C3 : ttccctcctgggtaagattccgatccatgaggaaatgctcctcgaaagtagattctgaatgaagatgaagatataaagtttccaatctcgaaagttaggg : 300  
TTCCCTCTCGGGTAAGATTCGATCCATGAGGAAATGCTCCTCGAAAGTAGATTCTGAATGAAGATGAAGATATAAAGTTTCCAATCTCGAAAGTTAGGC

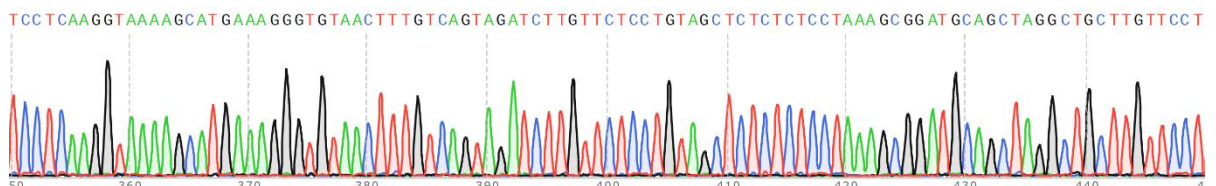

PCR\_C3 : tctcaaggtaaaagcatgaaaggggtgaactttgtcagtagatcttgctcctcgtagctcctcctcctaaagcggatgcagctaggctgctgttctct : 400  
r04\_C3 : tctcaaggtaaaagcatgaaaggggtgaactttgtcagtagatcttgctcctcgtagctcctcctcctcctaaagcggatgcagctaggctgctgttctct : 400  
TCC TCAAGGTAAAGCATGAAA GGGTGTAAC TTTGTGAGTAGATCTTGTTCTCCTGTAGCTCTCTCTCAAAGCGGATGACGCTAGGCTGCTTGTTCTT

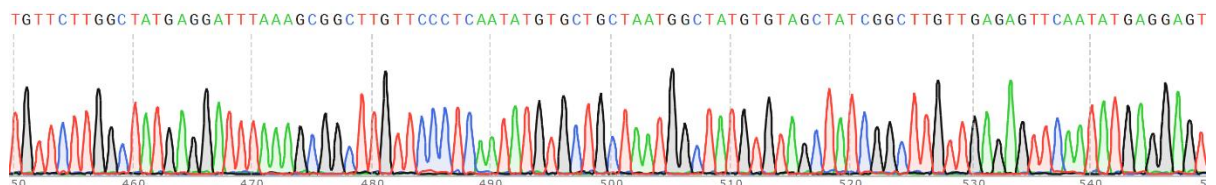

PCR\_C3 : tgttcttggctatgaggatttaaagcggcttggttcctcaatatgtgctgctaatggctatgtgtagctatcggcttggtgagagtccaatatgaggagt : 500  
r04\_C3 : tgttcttggctatgaggatttaaagcggcttggttcctcaatatgtgctgctaatggctatgtgtagctatcggcttggtgagagtccaatatgaggagt : 500  
TGTTCTTGGCTATGAGGATTTAAAGCGGCTTGTTCCCTCAATATGTGCTGCTAATGGCTATGTGTAGCTATCGGCTTGTGAGAGTTCAATATGAGGAGT

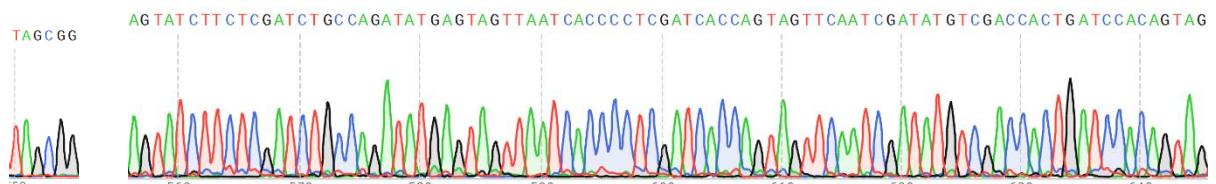

PCR\_C3 : tagcgg --- agtatcttctcgatctgccagatatgagttagttaatcacccctcgtacaccagtagttcaatcgatatgtcgaccactgatccacagtag : 596  
r04\_C3 : tagcggtttctgatatctctcgatctgccagatatgagttagttaatcacccctcgtacaccagtagttcaatcgatatgtcgaccactgatccacagtag : 600



TAGCGG G ATCT CTCGATCTGCCAGATATGAGTAGTTAATCACCCCTCG TCAC CAGTAGTTCAATCGATATGTCGACCACTGATCCACAGTAG

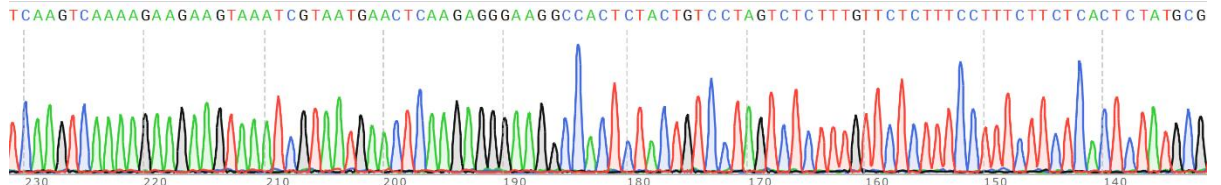

PCR\_C3 : tcaagtcaaaagaagaagtaaatcgtaatgaactcaagagggaaggccactctactgtcctagtctctttgttctctttcctttcttctcactctatgcg : 696  
r04\_C3 : tcaagtcaaaagaagaagtaaatcgtaatgaactcaagagggaaggccactctactgtcctagtctctttgttctctttcctttcttctcactctatgcg : 700  
TCAAGTCAAAAGAAGAAGTAAATCGTAATGAAGTCAAGAGGGAAGGCCACTCTACTGTCTCTAGTCTCTTTGTTCTCTTCTCTCTACTCTATGCG

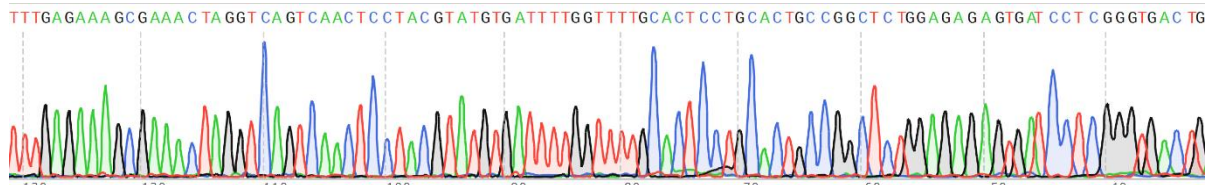

PCR\_C3 : tttagagaagcgaaactagggtcagtcactcctacgtatgtgattttgggtttgcactcctgcactgccggctctggagagagtgatcctcgggtgactg : 796  
r04\_C3 : tttagagaagcgaaactagggtcagtcactcctacgtatgtgattttgggtttgcactcctgcactgccggctctggagagagtgatcctcgggtgactg : 800  
TTTGAGAAAGCGAAACTAGGTCACTCACTCCTACGTATGTGATTTGGTTTGGCACTCCTGCCTGCGGCTCTGGAGAGAGATGATCCTCGGGTGACTG

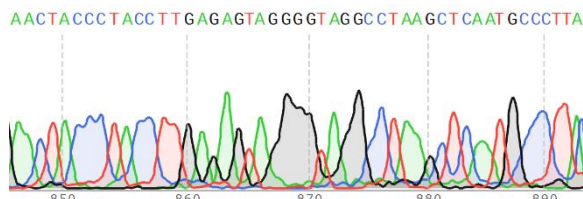

PCR\_C3 : aactaccctaccttgagagtaggggttaggcctaagctcaatgccctta : 844  
r04\_C3 : aactaccctaccttgagagtaggggttaggcctaagctcaatgccctta : 848  
AACTACCCTACCTTGAGAGTAGGGGTAGGCCTAAGCTCAATGCCCTTA

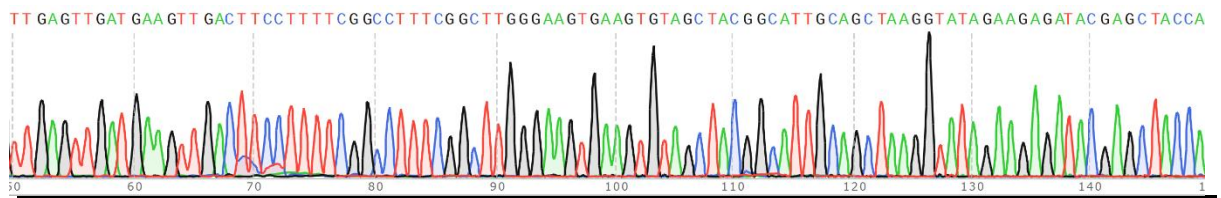

PCR\_C4 : tttagattgatgaagttgacttccttttcggccttttcggccttgggaagtgaagtgtagctacggcattgcagctaaggtatagaagagatcacgagctacca : 100  
r04\_C4 : tttagattgatgaagttgacttccttttcggccttttcggccttgggaagtgaagtgtagctacggcattgcagctaaggtatagaagagatcacgagctacca : 100  
TTGAGTTGATGAAGTTGACTTCCTTTTCGGCCTTTCGGCTTGGGAAGTGAAGTGATAGCTACGGCATTGCAGCTAAGGTATAGAAGAGATACGAGCTACCA

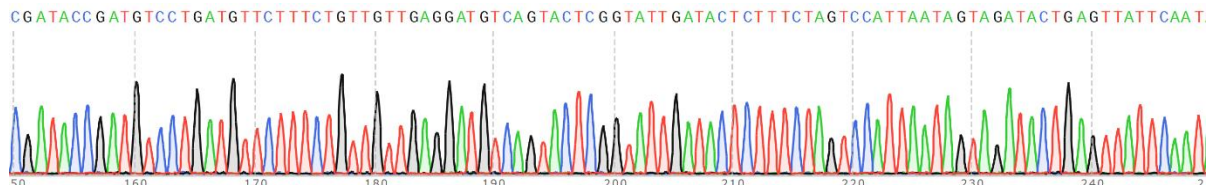

PCR\_C4 : cgataccgatgtcctgatgttctttctgttggtaggatgtcagtaactcgttattgatactctttctagtccattaatagtagatactgagttattcaat : 200  
r04\_C4 : cgataccgatgtcctgatgttctttctgttggtaggatgtcagtaactcgttattgatactctttctagtccattaatagtagatactgagttattcaat : 200  
CGATACCGATGTCCTGATGTTCTTCTGTTGTTGAGGATGTCAGTACTCGGTATTGATACTCTTTCTAGTCCATTAAATAGTAGATACTGAGTTATTCAAT

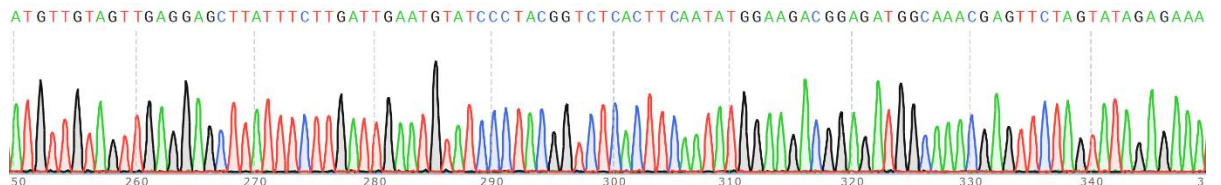

PCR\_C4 : atgtttagttgaggagcttatttcttgattgaatgtatccctacggctcacttcaatatggaagacggagatggcaaacgagttctagtatagagaaa : 300  
r04\_C4 : atgtttagttgaggagcttatttcttgattgaatgtatccctacggctcacttcaatatggaagacggagatggcaaacgagttctagtatagagaaa : 300  
ATGTTGATGTTGAGGAGCTTATTCTTCTGATTGAATGTATCCCTACGGCTCACTTCAATATGGAAGACGGAGATGGCAACGAGTTCTAGTATAGAGAAA

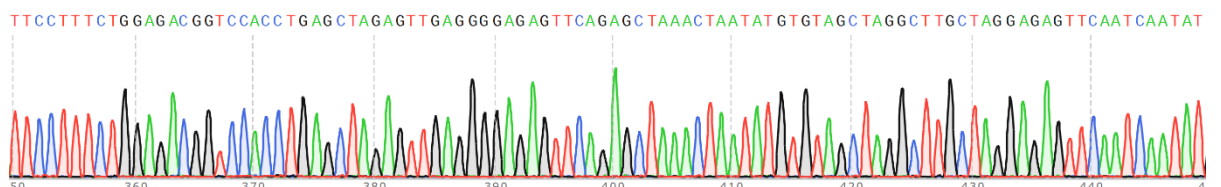

PCR\_C4 : ttctttctggagacggtccacctgagctagagttgaggggagagttcagagctaaactaatatgtgtagctaggcttgctaggagagttcaatcaatat : 400  
r04\_C4 : ttctttctggagacggtccacctgagctagagttgaggggagagttcagagctaaactaatatgtgtagctaggcttgctaggagagttcaatcaatat : 400  
TTCTTTCTGGAGACGGTCCACCTGAGCTAGAGTTGAGGGGAGAGTTCAGAGCTAAACTAATATGTTGAGCTAGGCTTGCTAGGAGAGTTCAATCAATAT

TTCCTTTCTGGAGACGGTCCACCTGAGCTAGAGTTGAGGGGAGAGTTTACAGAGCTAACTAATATGTGTAGCTAGGCTTGCTAGGAGAGTTCAATCAATAT

GAGTAGCTAAAGCGGATGCAGCTAGGCGGCTTGTTCTTGTCTTGGCTATGAGGATTTAAAGCGGCTTGTTCCCTCAATATGTGCTGCTAATGGCTATG

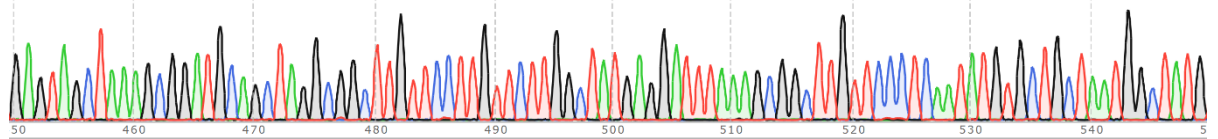

PCR\_C4 : gtagtagctaaagcggatgcagctaggcggcttgttccttgttcttggctatgaggatttaaagcggcttgttcctcctcaatatgtgctgctaattggctatg : 500  
r04\_C4 : gtagtagctaaagcggatgcagctaggcggcttgttccttgttcttggctatgaggatttaaagcggcttgttcctcctcaatatgtgctgctaattggctatg : 500  
GAGTAGCTAAAGCGGATGCAGCTAGGCGGCTTGTTCTTGTCTTGGCTATGAGGATTTAAAGCGGCTTGTTCCCTCAATATGTGCTGCTAATGGCTATG

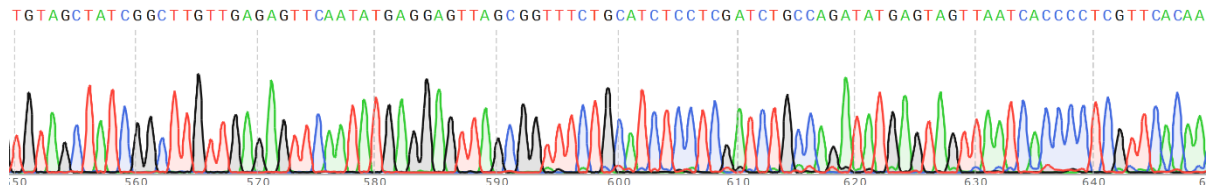

PCR\_C4 : ttagtagctatcggttgttgagagttcaatatgaggagtttagcggtttctgcatctctcgcagatctgccagatatgagtagttaatcaccctcgttcacaa : 600  
r04\_C4 : ttagtagctatcggttgttgagagttcaatatgaggagtttagcggtttctgcatctctcgcagatctgccagatatgagtagttaatcaccctcgttcacaa : 596  
TGTAGCTATCGGCTTGTTGAGAGTTCAATATGAGGAGTTAGCGGTTTCTGCACTCTCTCGATCTGCCAGATATGAGTAGTTAATCACCCCTCGTTACAA

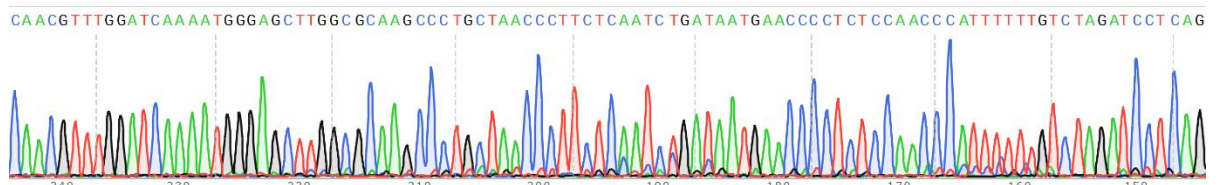

PCR\_C4 : caacgtttggatcaaaatgggagcttggcgcaagccctgctaacccttctcaatctgataatgaaccctctccaaccattttttgtctagatcctcag : 700  
r04\_C4 : caacgtttggatcaaaatgggagcttggcgcaagccctgctaacccttctcaatctgataatgaaccctctccaaccattttttgtctagatcctcag : 696  
CAACGTTTGGATCAAAATGGGAGCTTGGCGCAAGCCCTGCTAACCTTCTCAATCTGATAATGAACCCCTCTCCAACCATTTTTTGTCTAGATCCTCAG

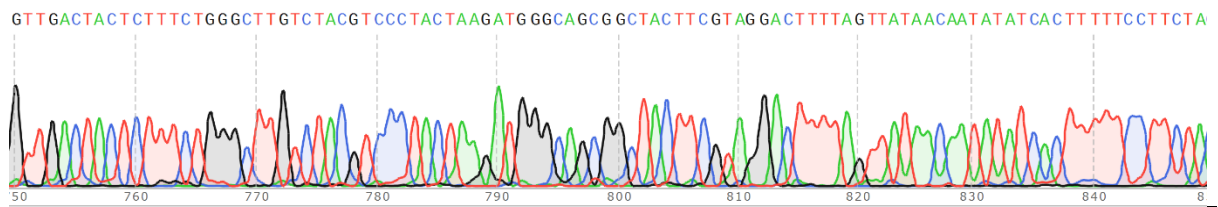

PCR\_C4 : gttgactactctttctgggcttgtctacgtccctactaagatgggcagcggctacttcgtaggacttttagttataacaatatatcactttttccttcta : 800  
r04\_C4 : gttgactactctttctgggcttgtctacgtccctactaagatgggcagcggctacttcgtaggacttttagttataacaatatatcactttttccttcta : 796  
GTTGACTACTCTTCTGGGCTTGTCTACGTCCCTACTAAGATGGGCAGCGGCTACTTCGTAGGACTTTTAGTTATAACAATATATCACTTTTTCCTTCTA

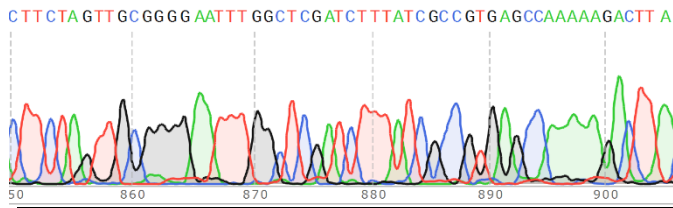

PCR\_C4 : cttctagttgcggggaatttggctcgatctttatcgccgtgagccaaaagactta : 856  
r04\_C4 : cttctagttgcggggaatttggctcgatctttatcgccgtgagccaaaagactta : 852  
CTTCTAGTTGCGGGGAATTTGGCTCGATCTTTATCGCCGTGAGCCAAAAGACTTA

e

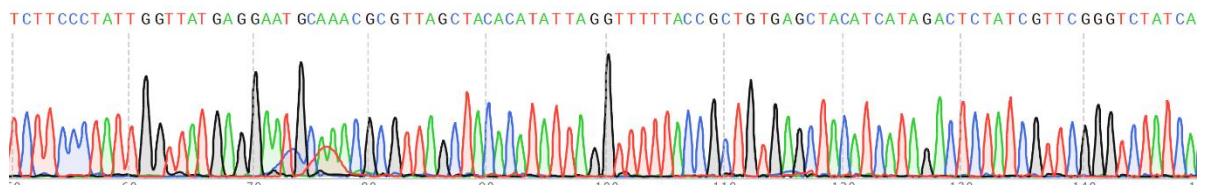

PCR\_C1 : tcttccctattggttatgaggaatgcaaacgcgttagctacacatattagggtttttaccgctgtgagctacatcatagactctatcggtcgggtctatca : 100  
r05\_C1 : tcttccctattggttatgaggaatgcaaacgcgttagctacacatattagggtttttaccgctgtgagctacatcatagactctatcggtcgggtctatca : 100  
TCTTCCCTATTGGTTATGAGGAATGCAACGCGTTAGCTACACATATTAGGTTTACCCTGTGAGCTACATCATAGACTCTATCGTTCGGGTCTATCA



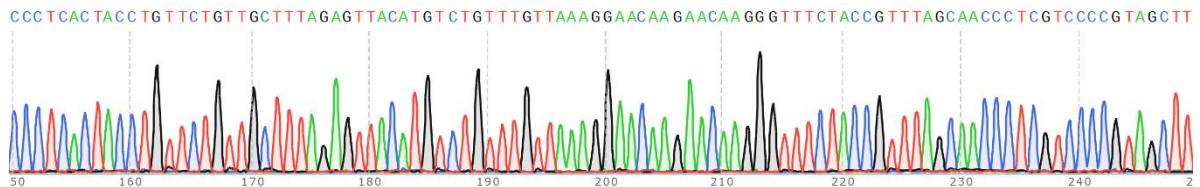

PCR\_C1 : cccctcactacctgttctgttgccttagagttacatgtctgtttgttaaaggaaacaagaacagggtttctaccgttttagcaacctcgtccccgtagctt : 200  
 r05\_C1 : cccctcactacctgttctgttgccttagagttacatgtctgtttgttaaaggaaacaagaacagggtttctaccgttttagcaacctcgtccccgtagctt : 200  
 CCCTCAC TACCTG TTTCTGT TGTCTT TGA G T TACATG TCTG TTTG TTAAGGAACAAGAACAAGGGTTTCTACCGTTTAGCAACCCCTCGTCCCCGTAGCTT

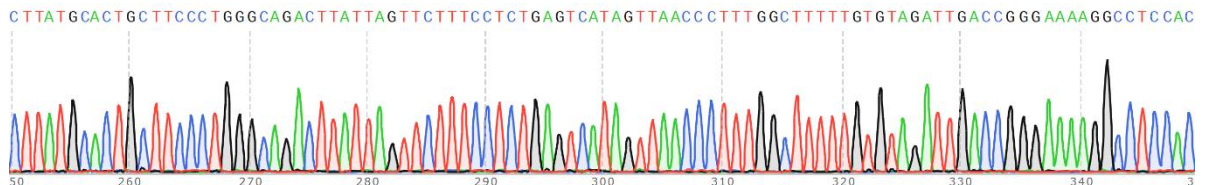

PCR\_C1 : cttatgcactgcttccctgggcagacttattagttctttcctctgagtcatagttaaccttttggtttttgtgtagattgacgggaaaaggcctccac : 300  
 r05\_C1 : cttatgcactgcttccctgggcagacttattagttctttcctctgagtcatagttaaccttttggtttttgtgtagattgacgggaaaaggcctccac : 300  
 CTTATGCACTGCTTCCCTGGGCA GACTTATTAGTTCTTTCCTCTGA GTCATAGTTAACCTTTTG GCTTTTGTGTAGATTGACCGGAAAAGGCTCCAC

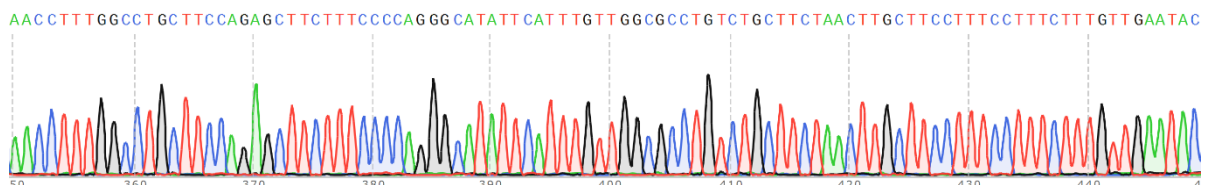

PCR\_C1 : aacctttggcctgcttccagagcttctttccccagggcataattcattgttggcgctgtctgcttctaactgtcttcttcttcttcttgttgaatac : 400  
 r05\_C1 : aacctttggcctgcttccagagcttctttccccagggcataattcattgttggcgctgtctgcttctaactgtcttcttcttcttcttgttgaatac : 400  
 AACCTTTGGCCTGCTTCCAGAGCTTCTTTCCCCAGGGCAGATTCATTGTTGGCGCCTGCTGCTGCTTCTAAGTTGCTTCTTCTTGTGAATAC

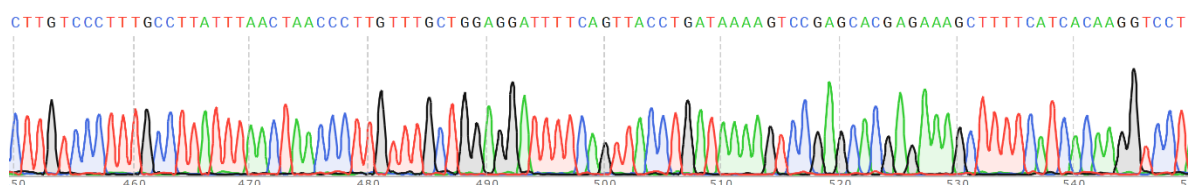

PCR\_C1 : cttgtccctttgcttatttaactaaccctgtttgctggaggattttcagttacctgataaaagtccgagcagcagagaagcttttcatcacaaggctcct : 500  
 r05\_C1 : cttgtccctttgcttatttaactaaccctgtttgctggaggattttcagttacctgataaaagtccgagcagcagagaagcttttcatcacaaggctcct : 500  
 CTTGTCCCTTTGCTTATTTAACTAACCTTG TTTGCTGGAAGATTTTCA GTTACCTGATAAAA GTCCGAGCAGGAGAAA GCTTTTCATCAAGAGGTCCT

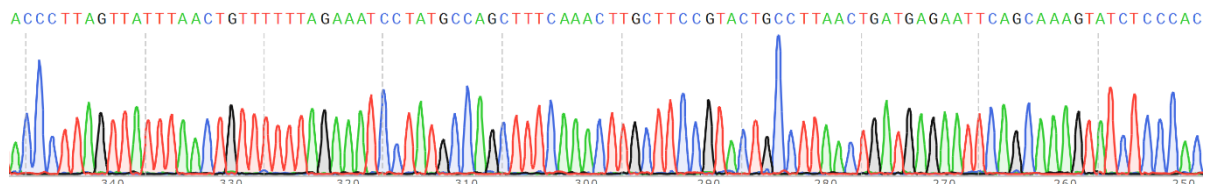

PCR\_C1 : acccttagttattttaactgttttttagaaatcctatgccagctttcaaaactgtcttcgactgccttaactgatgagaattcagcaaaagtatctccac : 600  
 r05\_C1 : acccttagttattttaactgttttttagaaatcctatgccagctttcaaaactgtcttcgactgccttaactgatgagaattcagcaaaagtatctccac : 600  
 ACCCTTAGTTATTAACTGTTTTT TAGAAATCCTATGCCAGCTTTCAAAGTGTCTTCGTA CTGCTTAAGTATGAGAAATTCAGCAAAGTATCTCCAC

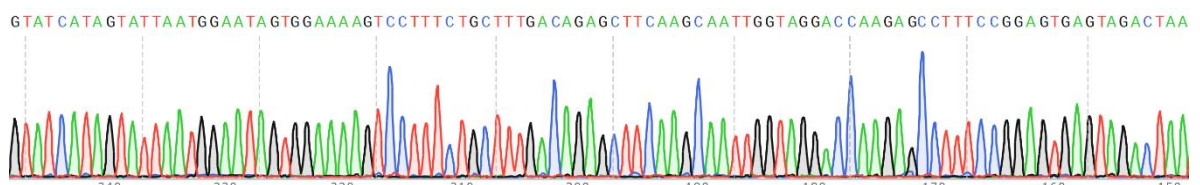

PCR\_C1 : gtatcatagttattaatggaatagtggaagaagtcctttctgtctttgacagagcttcaagcaattggtaggaccaagagcctttccggagtgagtactaa : 700  
 r05\_C1 : gtatcatagttattaatggaatagtggaagaagtcctttctgtctttgacagagcttcaagcaattggtaggaccaagagcctttccggagtgagtactaa : 700  
 GTATCATAGTATTAA TGAATAGTGGAAGAAGTCCTTTCTGCTTTGACAGAGCTTCAAGCAATTGGTAGGACCAAGAGCCTTTCCGGAGTGAGTAGACTAA

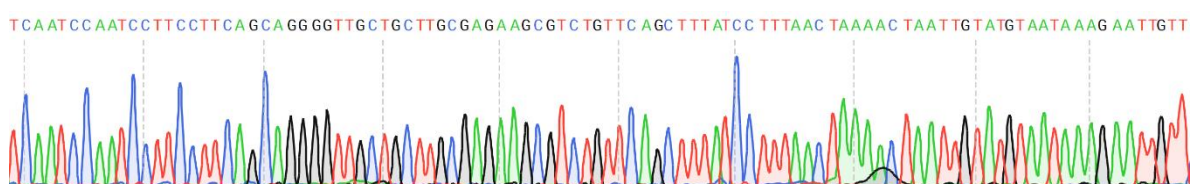

PCR\_C1 : tcaatccaatccttctcagcagggttgctgcttgcgagaagcgtctgttcagctttatcctttaaactaaaactaattgtatgtaataaagaattgtt : 800  
 r05\_C1 : tcaatccaatccttctcagcagggttgctgcttgcgagaagcgtctgttcagctttatcctttaaactaaaactaattgtatgtaataaagaattgtt : 800  
 TCAATCCAATCCTTCTTCAGCAGGGTTGCTGCTTGCAGAGCGTCTGTTTCAAGCTTTATCCTTTAACTAAAATAATTGTATGTAATAAAGAATTGTT

CTACTGGTATTTCTACGTTGATCTCTACTT

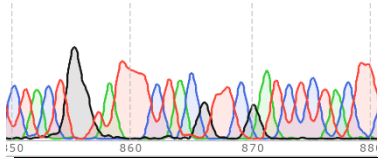

PCR\_C1 : ctactggtattttctacgttcgatctctactt : 831  
r05\_C1 : ctactggtattttctacgttcgatctctactt : 831  
CTACTGGTATTTCTACGTTGATCTCTACTT

AGCTCAAGTGGAAGATGATGGGGCTACGAAGCTAAGAAAGGGCTAGGGGTGCGGTGCGATTCTGCTTGCCTTGGCTGCCACTCTATTATTAAAGGGCTT

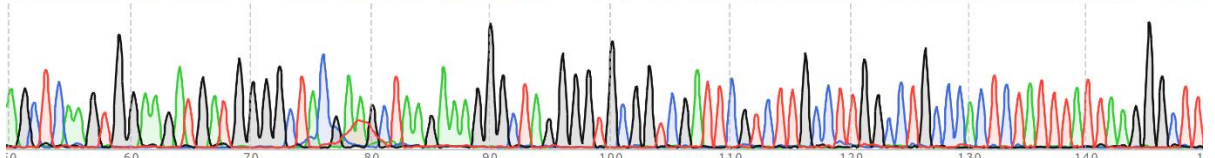

PCR\_C2 : agctcaagtggaaagatgatggggctacgaagctaagaaagggctaggggtgcggtcgattcgtcttgccctggcctgccactctatttattaaggcgtt : 100  
r05\_C2 : agctcaagtggaaagatgatggggctacgaagctaagaaagggctaggggtgcggtcgattcgtcttgccctggcctgccactctatttattaaggcgtt : 100  
AGCTCAAGTGGAAGATGATGGGGCTACGAAGCTAAGAAAGGGCTAGGGGTGCGGTGCGATTCTGCTTGCCTTGGCTGCCACTCTATTATTAAAGGGCTT

GGCTGATCGGGAAGGCGTTCAATCTCCTCCTCGCTTACTGTTGATCAGCTAAGAGTTCTTTACTTTTATTCGCTTGGAAACCTTGCGTGATCTACCAAG

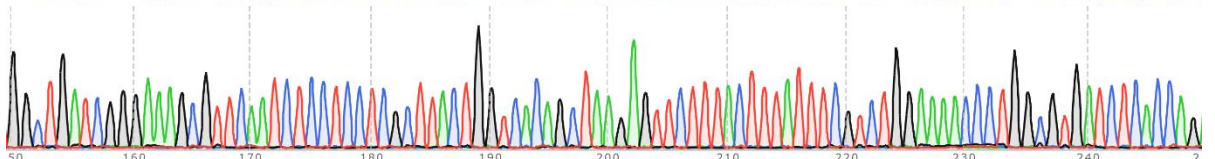

PCR\_C2 : ggctgatcgggaaagcggttcaatctcctcctcgcttactggtcacagctaagagttctttactttatttcgcttggaacacctggcgtgatctcaccag : 200  
r05\_C2 : ggctgatcgggaaagcggttcaatctcctcctcgcttactggtcacagctaagagttctttactttatttcgcttggaacacctggcgtgatctcaccag : 200  
GGCTGATCGGGAAGGCGTTCAATCTCCTCCTCGCTTACTGGTCACAGCTAAGAGTTCTTTACTTTTATTCGCTTGGAAACCTTGCGTGATCTACCAAG

AGTTCTCAGCACCAAGTCAACGGTCCAGGTCCTTAAACGACCGCTTTGCCCTTGCAGCGGATTCCATGGCATCTTACTCCGACCTTGATTGCTACGG

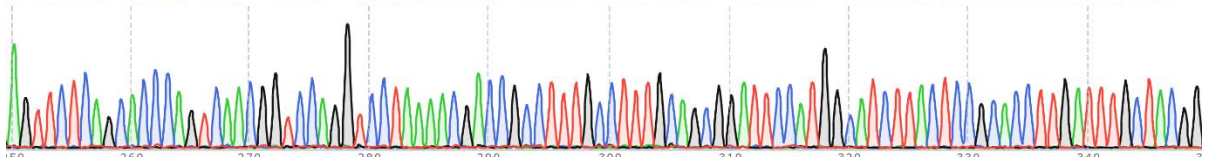

PCR\_C2 : agttctcagcaccagtcacaggtccaggtcctaaaacgacgcctttgcctttgcagcggattccatggcatcttactccgcaccttgatttgctacgg : 300  
r05\_C2 : agttctcagcaccagtcacaggtccaggtcctaaaacgacgcctttgcctttgcagcggattccatggcatcttactccgcaccttgatttgctacgg : 300  
AGTTCTCAGCACCAAGTCAACGGTCCAGGTCCTTAAACGACCGCTTTGCCCTTGCAGCGGATTCCATGGCATCTTACTCCGACCTTGATTGCTACGG

GATAGGACCTTAACATAAGCATTTTCCCTTTGGCTTCTTCAGAGGCTTCTTTCCCAAGGCGATATTCAATTGTTGGCGCTGTCTGCTTCTAATTGCTTC

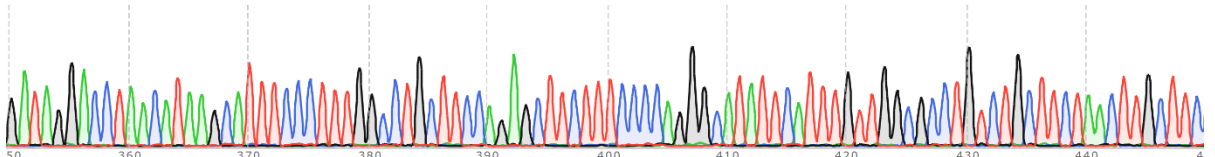

PCR\_C2 : gataggacctaacataagcatttccctttggcctgcttcagagcttctttcccccagggcattcatttggcgcctgctcgttcttaacttgcctt : 400  
r05\_C2 : gataggacctaacataagcatttccctttggcctgcttcagagcttctttcccccagggcattcatttggcgcctgctcgttcttgccttgcctt : 400  
GATAGGACCTTAACATAAGCATTTCTTTGGCCTGCTTCCAGAGCTTCTTTCCCAAGGCGATATTCAATTGTTGGCGCTGTCTGCTTCTAATTGCTTC

CTTTCTTTCTCAACAAGCAACAAGCTGAGCGCACTAGCGCGAAAGCGCTTGCCTGTTAGTCGCGCATCCGTTTTCTTGTTCAGCGCACTTGCTCCCAATTT

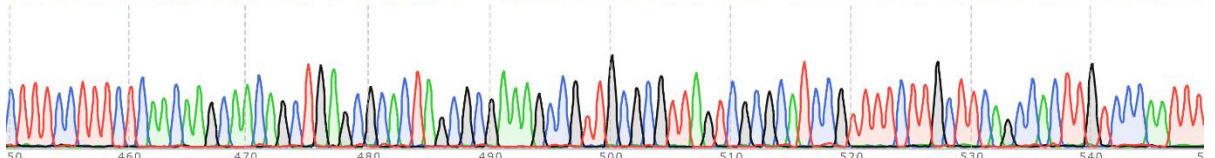

PCR\_C2 : ctttcctttctcaacaagcaacagctgagcgcactagcgcgaaagccgttgccggttagtcgcgcacccgttttcttgccttcagccacttgcccaattt : 500  
r05\_C2 : ctttcctttctcaacaagcaacagctgagcgcactagcgcgaaagccgttgccggttagtcgcgcacccgttttcttgccttcagccacttgcccaattt : 500  
CTTTCTTTCTCAACAAGCAACAAGCTGAGCGCACTAGCGCGAAAGCCGTTGCGGTTAGTCGCGCATCCGTTTTCTTGTCTCAGCCACTTGTCCTCAATTT

TTTCTTTCTTACCGGCTTCTATTACTTTGATTACGAATCAACGTTGGGATTGGAAGATCTCTGTGGAAGCTCATCCATTGCTTTCCATTCTGGGACA

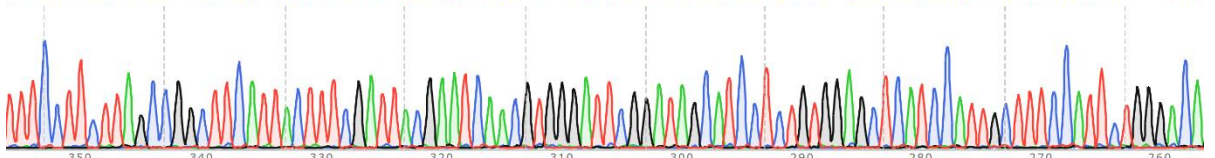

PCR\_C2 : ttctccttcttagccggcttcattactttcgattacgaatcaacgtgggattcggatagcatcctctgtggagctcatccattgctttccattctgggaca : 600  
r05\_C2 : ttctccttcttagccggcttcattactttcgattacgaatcaacgtgggattcggatagcatcctctgtggagctcatccattgctttccattctgggaca : 600  
TTTCTTTCTTACCGGCTTCTATTACTTTGATTACGAATCAACGTTGGGATTGGAAGATCTCTGTGGAAGCTCATCCATTGCTTTCCATTCTGGGACA



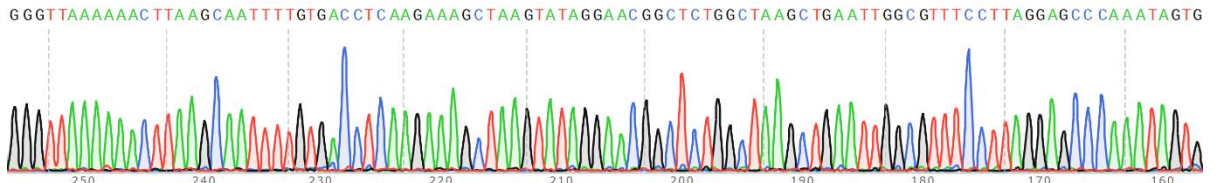

PCR\_C2 : gggttaaaaaacttaagcaattttgtgacctcaagaagctaagtataggaacggctctggctaagctgaattggcggtttccttaggagcccaaatagtg : 700  
 r05\_C2 : gggttaaaaaacttaagcaattttgtgacctcaagaagctaagtataggaacggctctggctaagctgaattggcggtttccttaggagcccaaatagtg : 700  
 GGGTAAAAAActTAAGCAATTTTGTGACCTCAAGAAAGCTAAGTATAGGAACGGCTCTGGCTAAGCTGAATTGGCGTTTCCTTAGGAGCCCAATAGTG

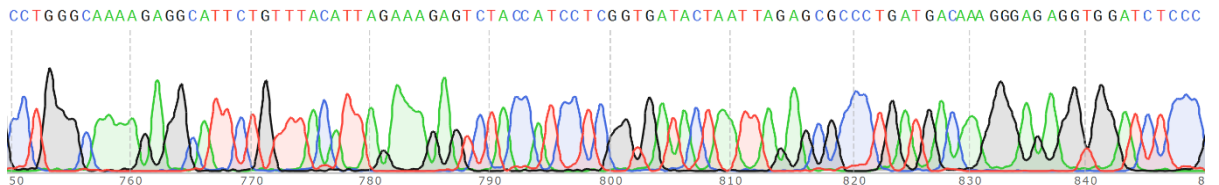

PCR\_C2 : cctgggcaaaaagaggcattctgtttacattagaaagagctaccatcctcggtgataactaattagagcgccctgatgacaagggagaggtggatctccc : 800  
 r05\_C2 : cctgggcaaaaagaggcattctgtttacattagaaagagctaccatcctcggtgataactaattagagcgccctgatgacaagggagaggtggatctccc : 799  
 CCTGGGCAAAAAGAGGCATTCTGTTTACATTAGAAAGAGTCTACCATCCTCGGTGATACTAATTAGAGCGCCCTGATGAC AAGGGAGAGGTGGATCTCCC

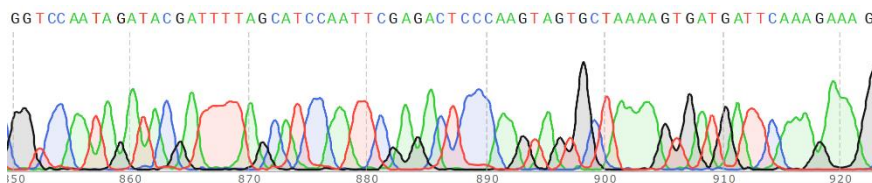

PCR\_C2 : ggtccaatagatagcatttttagcatccaattcgagactcccaagtagtgctaaaagtgatgattcaaagaaag : 873  
 r05\_C2 : ggtccaatagatagcatttttagcatccaattcgagactcccaagtagtgctaaaagtgatgattcaaagaaag : 872  
 GGTCCAATAGATACGATTTTAGCATCCAATTCGAGACTCCCAAGTAGTGCTAAAAGTGATGATTCAAAGAAAG

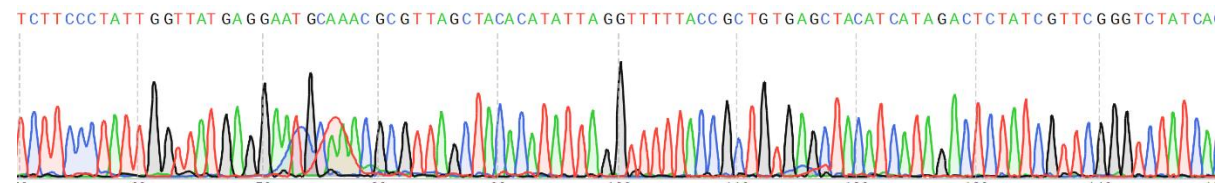

PCR\_C3 : tcttccctatttggttatgaggaatgcaaacgcggttagctacacatattagggtttttaccgctgtgagctacatcatagactctatcggttcgggtctatca : 100  
 r05\_C3 : tcttccctatttggttatgaggaatgcaaacgcggttagctacacatattagggtttttaccgctgtgagctacatcatagactctatcggttcgggtctatca : 100  
 TCTTCCCTATTGGTTATGAGGAATGCAACGC GTT AGCTACACATTTA GGTTTTTACC GC TG TGA GCTACAT CAT A GACTCTATC GTTTC GGGTCTATCA

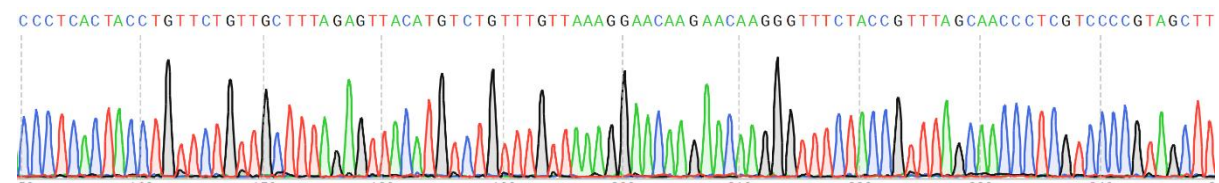

PCR\_C3 : ccctcactacctgttctgttgccttagagttacatgtctgtttgttaaaggaaacaagaacagggtttctaccggttaggaacccctcggtcccgtagctt : 200  
 r05\_C3 : ccctcactacctgttctgttgccttagagttacatgtctgtttgttaaaggaaacaagaacagggtttctaccggttaggaacccctcggtcccgtagctt : 200  
 CCCTCACTACCTGTTCTGTGCTTTAGAGTTACATGTCTGTTTGTAAAGGAACAAGAACAAGGGTTTCTACCGTTTAGCAACCCCTCGTCCCCGTAGCTT

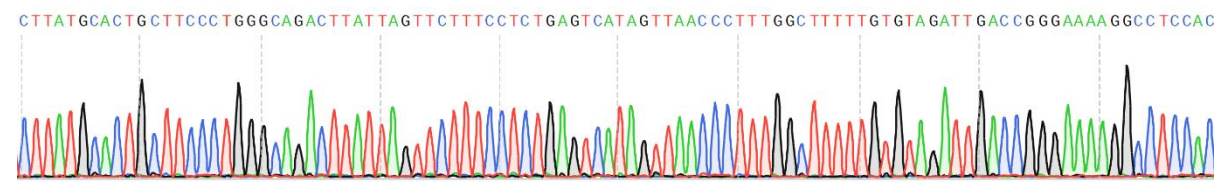

PCR\_C3 : cttatgcactgcttccctgggcagacttattagttcttctcctctgagtcagtagttaaccctttggcgtttttgtgtagattgaccgggaaaaggcctccac : 300  
 r05\_C3 : cttatgcactgcttccctgggcagacttattagttcttctcctctgagtcagtagttaaccctttggcgtttttgtgtagattgaccgggaaaaggcctccac : 300  
 CTTATGCACTGCTTCCTGGGCAGACTTATTAGTTCTTCTCTGAGTCATAGTTAACCCTTTGGCTTTTGTGTAGATTGACCGGAAAAGGCTCCAC

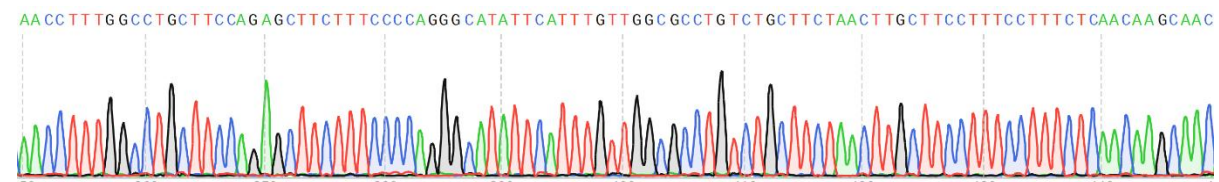

PCR\_C3 : aacctttggcctgcttccagagcttcttcccccagggcattcatttggctggcgctgtctgttcttaactgttcttcttcttctcaacaagcaac : 400  
 r05\_C3 : aacctttggcctgcttccagagcttcttcccccagggcattcatttggctggcgctgtctgttcttaactgttcttcttcttctcaacaagcaac : 400  
 AA CTTTGGCCTGCTTCCAGAGCTTCTTCCCCAGGGCATATTCAATTGTGTGGCGCTGTCTGCTTCTAAGTCTGCTTCTTCTTCTCAACAAGCAAC

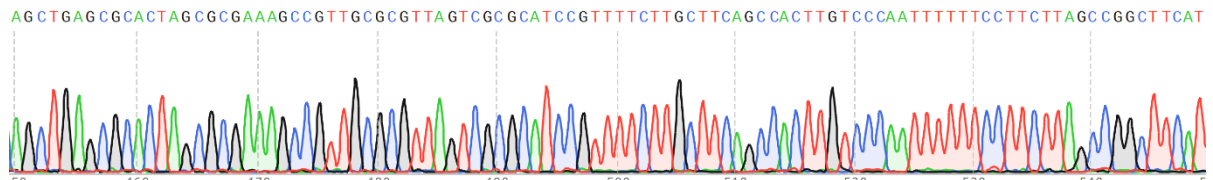

PCR\_C3 : agctgagcgcactagcgcgaaagccggtgcgcgttagtcgcgcacccgttttcttgcttcagccacttgtcccaatttttcttcttagccggttcatt : 500  
 r05\_C3 : agctgagcgcactagcgcgaaagccggtgcgcgttagtcgcgcacccgttttcttgcttcagccacttgtcccaatttttcttcttagccggttcatt : 500  
 AGCTGAGCGCACTAGCGCGAAAGCCGTTGCGCGTTAGTGCGCATCCGTTTTCTTGCTTCAGCCACTTGTCCCAATTTTTCTTCTTAGCCGCTTCAT

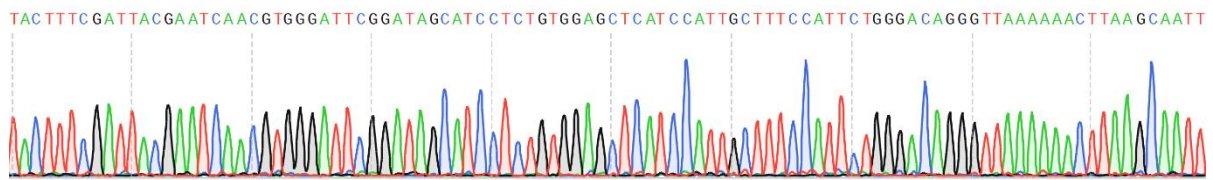

PCR\_C3 : tactttcgattacgaatcaacgtgggatttcggatagcatcctctgtggagctcatccattgctttccattctctgggacagggttaaaaaacttaagcaatt : 600  
 r05\_C3 : tactttcgattacgaatcaacgtgggatttcggatagcatcctctgtggagctcatccattgctttccattctctgggacagggttaaaaaacttaagcaatt : 600  
 TACTTTCGATTACGAATCAACGTGGGATTTCGGATAGCATCCTCTGTGGAGCTCATCCATTGCTTTCATTCTGGGACAGGGTTAAAAAAGCTTAAGCAATT

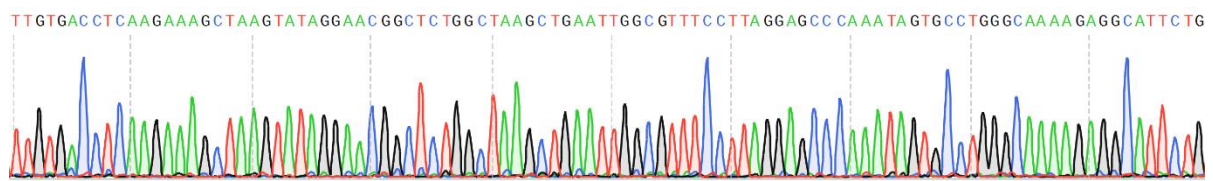

PCR\_C3 : ttgtgacctcaagaaagctaagtataggaacggctctggctaagctgaattggcggtttccttaggagcccaaatagtcctgggcaaaagaggcattctg : 700  
 r05\_C3 : ttgtgacctcaagaaagctaagtataggaacggctctggctaagctgaattggcggtttccttaggagcccaaatagtcctgggcaaaagaggcattctg : 700  
 TTGTGACCTCAAGAAAGCTAAGTATAGGAACGGCTCTGGCTAAGCTGAATTGGCGTTTCTTAGGAGCCCAAAATAGTGCCTGGGCAAAAGAGGCATTCTG

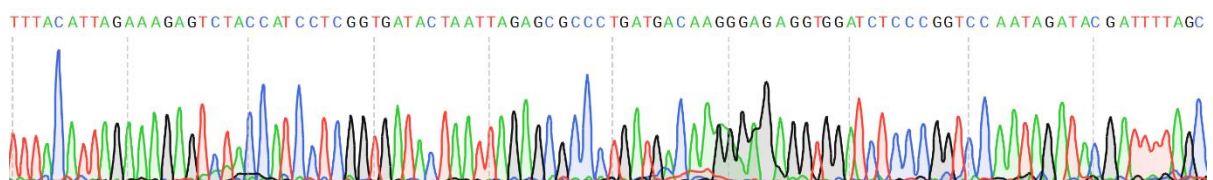

PCR\_C3 : tttaacattagaagagctaccatcctcggtgataactaattagagcgccctgatgacaaggagaggtggatctcccgggtccaatagatagcatttttagc : 800  
 r05\_C3 : tttaacattagaagagctaccatcctcggtgataactaattagagcgccctgatgacaaggagaggtggatctcccgggtccaatagatagcatttttagc : 800  
 TTTACATTAGAAAGAGTCTACCATCTCTCGGTGATACTAATTAGAGCGCCCTGATGACAAGGGAGAGGTGGATCTCCCGGTCCAATAGATACGATTTTAGC

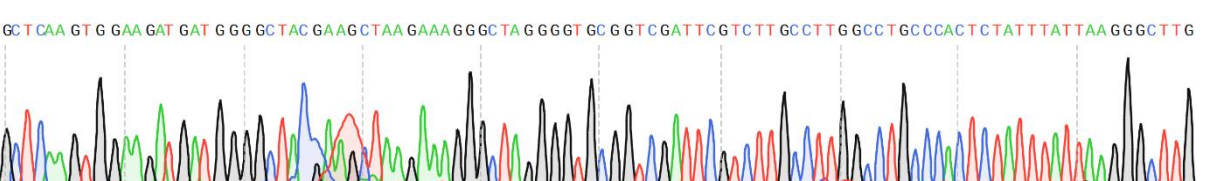

PCR\_C4 : gctcaagtgggaagatgatggggctacgaagctaagaagggttaggggtgcggtcgattcgctcttgccctggcctgccactctatttattaaaggcgttg : 100  
 r05\_C4 : gctcaagtgggaagatgatggggctacgaagctaagaagggttaggggtgcggtcgattcgctcttgccctggcctgccactctatttattaaaggcgttg : 100  
 GCTCAAGTGAAGATGATGGGGCTACGAAGCTAAGAAGGGCTAGGGGTGCGGTCGATTCTGCTTGCCTTGGCCTGCCACTCTATTATTAAAGGGCTTG

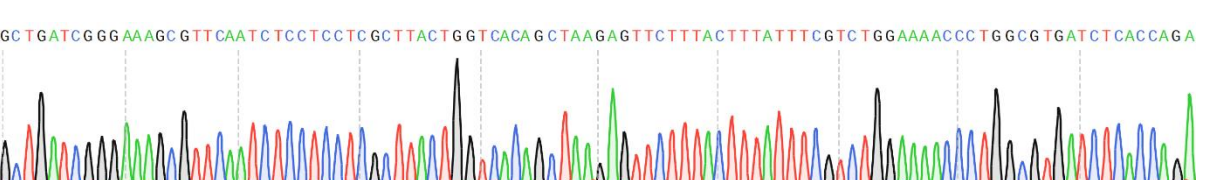

PCR\_C4 : gctgatcgggaaagcgttcaatctcctcgttactggtcacagctaagagttctttacttttctgctctggaaaacctggcgtgatctcaccaga : 200  
 r05\_C4 : gctgatcgggaaagcgttcaatctcctcgttactggtcacagctaagagttctttacttttctgctctggaaaacctggcgtgatctcaccaga : 200  
 GCTGATCGGGAAAGCGTTCAATCTCCTCCTCGCTTACTTGGTCACAGCTAAGAGTTCTTTACTTTTCTGCTGCGAAAACCTTGCGGTGATCTCACCAGA

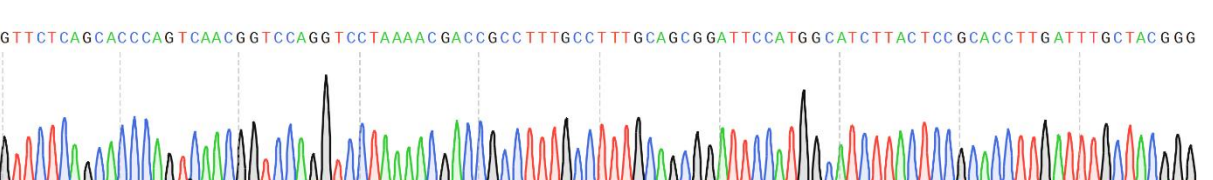

PCR\_C4 : gttctcagcacccagtcacaggtccaggctcctaaaaagacgcctttgctttgcagcggattccatggcatcttactccgcaccttgatttgctacggg : 300



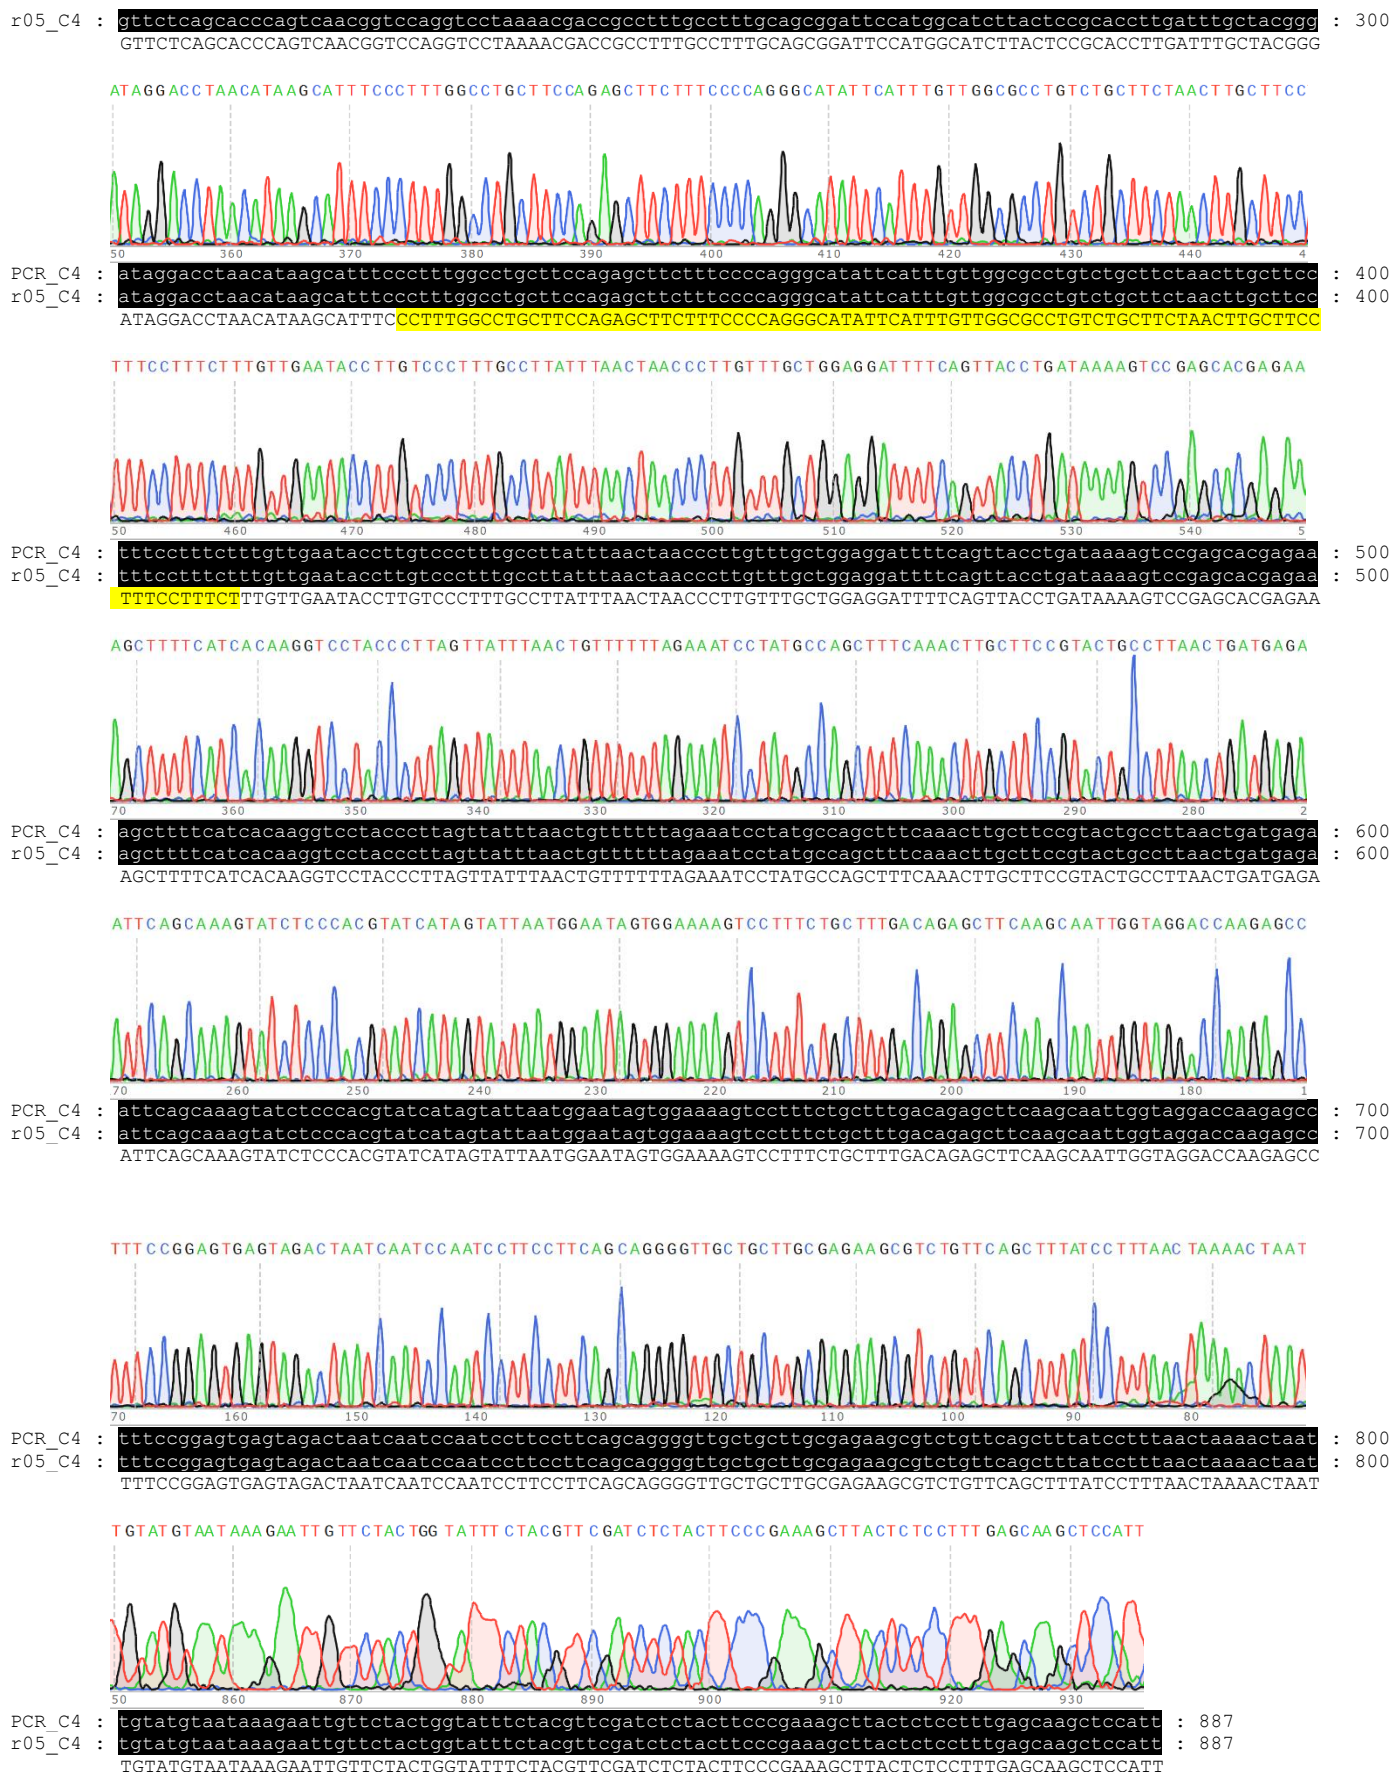

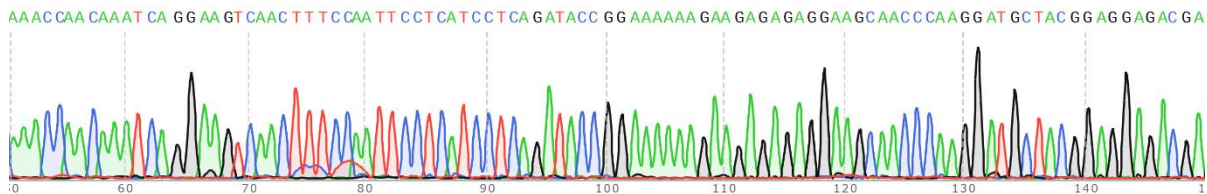

PCR\_C1 : aaaccaacaatcaggaagtcaactttccaattcctcatctcagataccggaagagagaggaagcaaccaaggatgctacggaggagacga : 100  
 r06\_C1 : aaaccaacaatcaggaagtcaactttccaattcctcatctcagataccggaagagagaggaagcaaccaaggatgctacggaggagacga : 100  
 AAACCAACAAATCAGGAAGTCAACTTTCCAATTCTCATCTCAGATACCAGGAAAAAGAGAGAGAGGAAGCAACCAAGGATGCTACGGAGGAGACGA

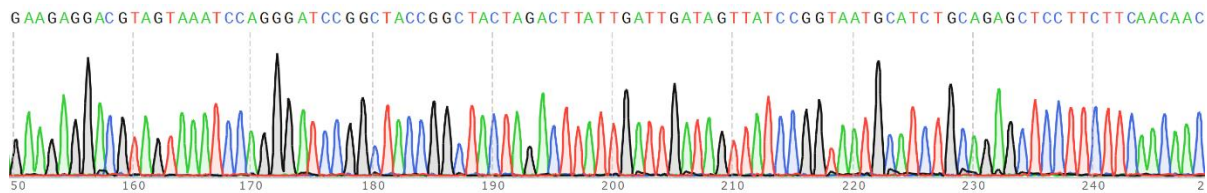

PCR\_C1 : gaagaggacgtagtaaatccagggatccggctaccggctactagacttattgattgatagttatccggtaatgcacatgcagagctccttcttcaacaac : 200  
 r06\_C1 : gaagaggacgtagtaaatccagggatccggctaccggctactagacttattgattgatagttatccggtaatgcacatgcagagctccttcttcaacaac : 200  
 GAAGAGGACGTAGTAAATCCAGGATCCGGCTACCGGCTACTAGACTTATTGATTGATAGTTATCCGGTAATGCATCTGCAGAGCTCCTTCTTCAACAAC

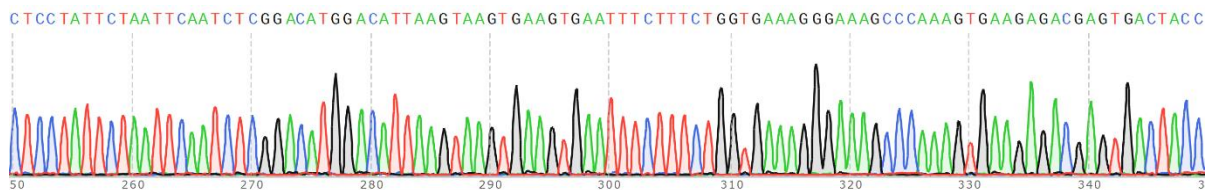

PCR\_C1 : ctctatttctaattcaatctcggacatggacattaagtaagtgaagtgaatttcttctggtgaaagggaaagccaaagtgaagagacgagtactacc : 300  
 r06\_C1 : ctctatttctaattcaatctcggacatggacattaagtaagtgaagtgaatttcttctggtgaaagggaaagccaaagtgaagagacgagtactacc : 300  
 CTCTATTCTAATTCAATCTCGGACATGGACATTAAGTAAGTGAAGTGAATTTCTTCTGGTGAAAGGGAAAGCCAAAGTGAAGAGACGAGTGACTACC

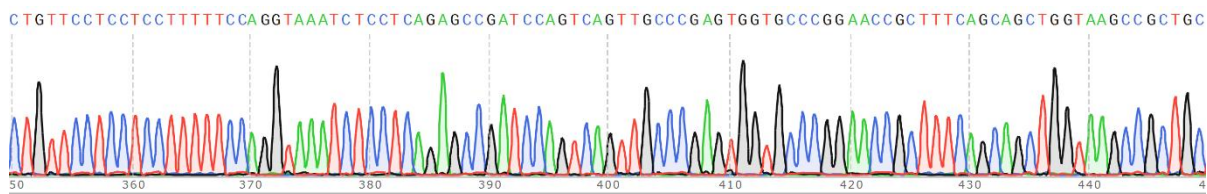

PCR\_C1 : ctgttctcctcctctttttccaggtaaatctcctcagagccgatccagtcagttgcccagtggtgcccgaacgcgtttcagcagctggttaagccgctgc : 400  
 r06\_C1 : ctgttctcctcctcctttttccaggtaaatctcctcagagccgatccagtcagttgcccagtggtgcccgaacgcgtttcagcagctggttaagccgctgc : 400  
 CTGTCTCTCTCTTTTTCAGGTAAATCTCCTCAGAGCCGATCCAGTCAGTTGCCCGAGTGGTGCCCGGAACCGCTTTCAGCAGCTGGTAAAGCCGCTGC

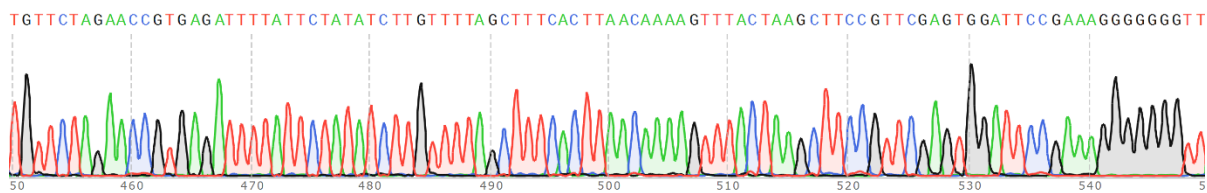

PCR\_C1 : tgttctagaacgctgagattttattctatatcttggttttagccttcaacttaacaaaagtttactaagcttccgttcgagtggttcgaaagggggggtt : 500  
 r06\_C1 : tgttctagaacgctgagattttattctatatcttggttttagccttcaacttaacaaaagtttactaagcttccgttcgagtggttcgaaagggggggtt : 500  
 TGTCTAGAACCGTGAGATTTTATCTATATCTGTTTGTAGCTTCACTTAACAAAAGTTTACTAAGCTTCCGTTGAGTGGATTCCGAAAGGGGGGGTT

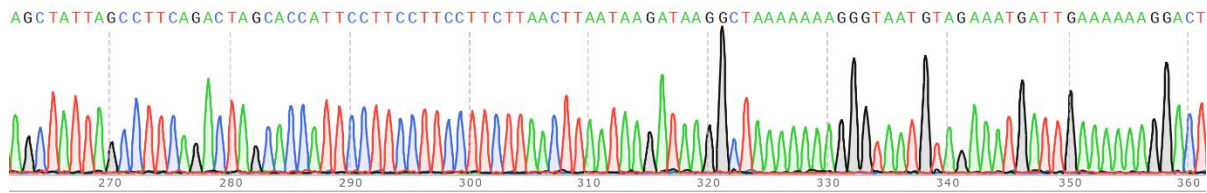

PCR\_C1 : agtccttttttcaatcattttctacattacccttttttagccttatcttattaagtttaagaaggaaggaaggaatggtgctagctgaaggctaataagct : 600  
 r06\_C1 : agtccttttttcaatcattttctacattacccttttttagccttatcttattaagtttaagaaggaaggaaggaatggtgctagctgaaggctaataagct : 600  
 AGTCCTTTTTCATCATTTCTACATTACCCTTTTGTAGCCTTATCTTATTAAGTTAAGAAGGAAGGAAGGAATGGTGCTAGTCTGAAGGCTAATAGCT

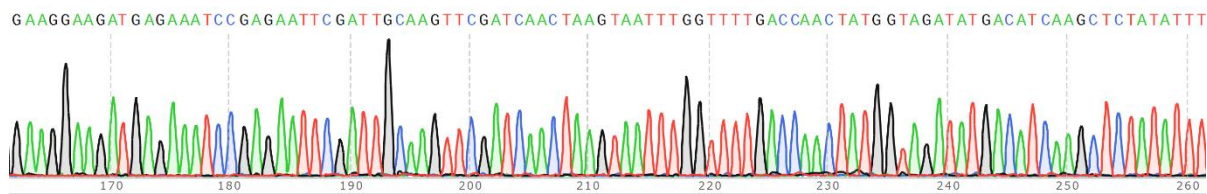

PCR\_C1 : aaatatagagcttgatgtcatatctaccatagttgggtcaaaaccaaattacttagttgatcgaaacttgcaatcgaattctcggatttctcatcttcttc : 700  
 r06\_C1 : aaatatagagcttgatgtcatatctaccatagttgggtcaaaaccaaattacttagttgatcgaaacttgcaatcgaattctcggatttctcatcttcttc : 700  
 AAATATAGAGCTTGATGTCTATCTACCATAGTTGGTCAAAACCAAAATTAAGTTAGTTGATCGAACTTGCAATCGAATTCCTCGGATTCTCATCTTCTCTTC



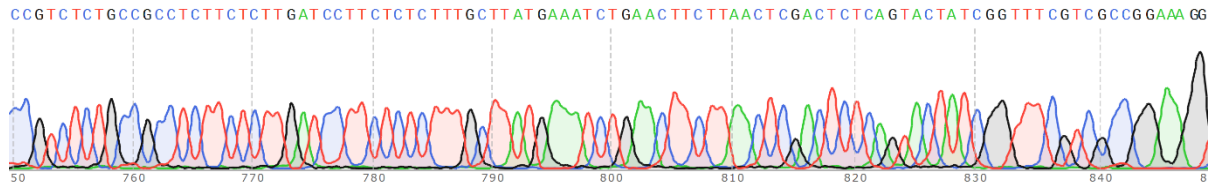

PCR\_C1 : ccgtctctgcccgcctcttctcttgatccttctctctttgcttatgaaatctgaacttcttaactcgactctcagtaactatcggtttcgtcgccggaaagg : 800  
 r06\_C1 : ccgtctctgcccgcctcttctcttgatccttctctctttgcttatgaaatctgaacttcttaactcgactctcagtaactatcggtttcgtcgccggaaagg : 799  
 CCGTCTCTGCGCCTCTTCTCTTGATCCTTCTCTCTTTGCTTATGAAATCTGAACCTTCTTAACCTGACTCTCAGTACTATCGGTTTCTGTCGCCG AAGG

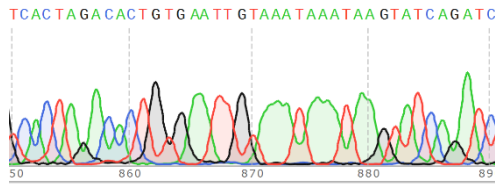

PCR\_C1 : tcactagacactgtgaattgtaaataaataagtatcagatc : 841  
 r06\_C1 : tcactagacactgtgaattgtaaataaataagtatcagatc : 840  
 TCACTAGACACTGTGAATTGTAAATAAATAAGTATCAGATC

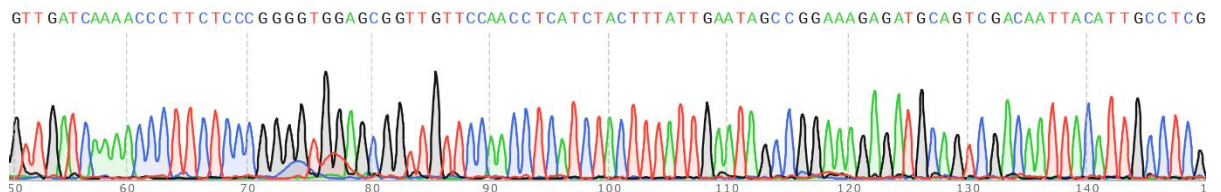

PCR\_C2 : gttgatcaaaaccccttctcccggtggagcgggtgttccaacctcatctactttattgaatagccggaagagatgcagtcgacaattacattgcctcg : 100  
 r06\_C2 : gttgatcaaaaccccttctcccggtggagcgggtgttccaacctcatctactttattgaatagccggaagagatgcagtcgacaattacattgcctcg : 100  
 GTTGATCAAAACCCCTTCTCCCGGGGTGGAGCGGTTGTTCCAACCTCATCTACTTTATTGAATAGCCGGAAGAGATGCAGTCGACAATTACATTGCCTCG

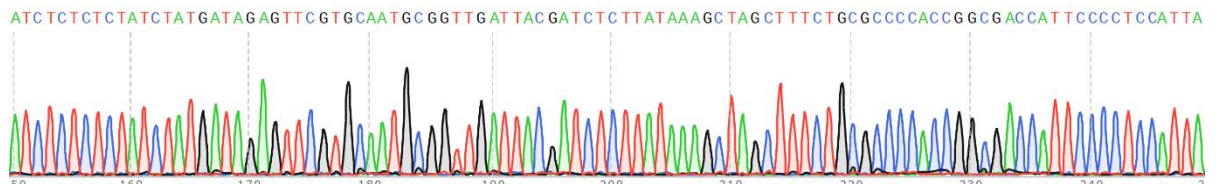

PCR\_C2 : atctctctctatctatgatagagttcgtgcaatgcggttgattacgatctcttataaagctagctttctgccccaccggcgaccattccctccatta : 200  
 r06\_C2 : atctctctctatctatgatagagttcgtgcaatgcggttgattacgatctcttataaagctagctttctgccccaccggcgaccattccctccatta : 200  
 ATCTCTCTATCTATGATAGAGTTCGTGCAATGCGGTTGATTACGATCTCTTATAAAGCTAGCTTTCTGCGCCCCACCGGCGACCAATTCCCTCCATTA

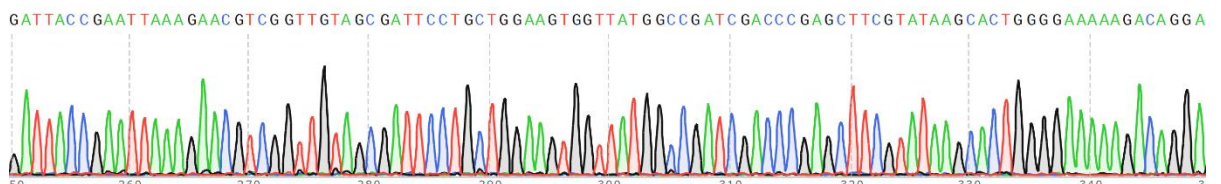

PCR\_C2 : gattaccgaattaaagaacgtcggttgtagcgattcctgctggaagtgggttatggccgatcgaccgagcttcgtataagcactggggaaaaagacagga : 300  
 r06\_C2 : gattaccgaattaaagaacgtcggttgtagcgattcctgctggaagtgggttatggccgatcgaccgagcttcgtataagcactggggaaaaagacagga : 300  
 GATTACCGAATTAAAGAACGTGCGTTGTAGCGATTCTGCTGGAAGTGGTTATGCGCCGATCGACCCGAGCTTCGTATAAGCACTGGGGAAAAAGACAGGA

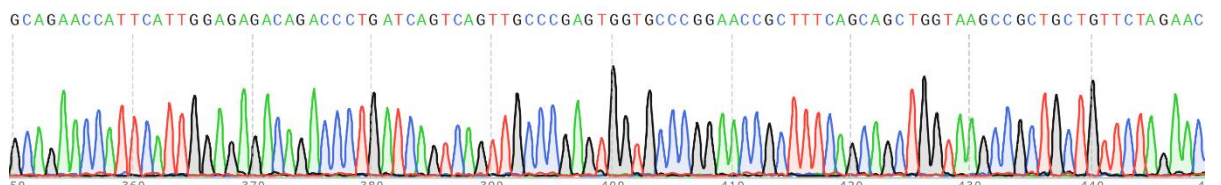

PCR\_C2 : gcagaaccattcattggagagacagacctgatcagtcagttgcccgagtggtgcccggaaccgctttcagcagctggtaagccgctgctgttctagaac : 400  
 r06\_C2 : gcagaaccattcattggagagacagacctgatcagtcagttgcccgagtggtgcccggaaccgctttcagcagctggtaagccgctgctgttctagaac : 400  
 GCAGAACCATTTCAATTGAGAGACAGACCTGATCAGTCAGTTGCCCGAGTGCTGCCCGGAAACCGCTTTCAGCAGCTGGTAAGCCGCTGCTGTTCTAGAAC

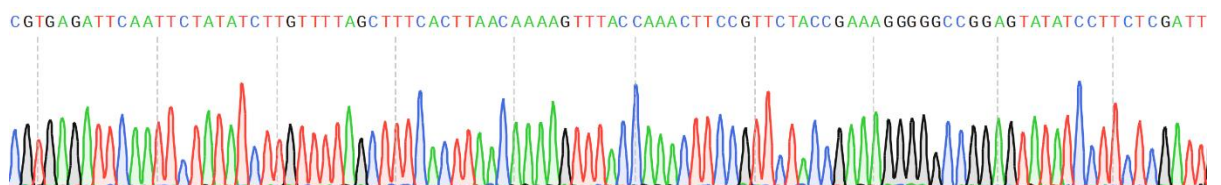

PCR\_C2 : cgtgagattcaattctatctctgttttagctttcacttaacaaaagtgttacaaacttcggttctaccgaaagggggccggagtatatccttctcgatt : 500  
 r06\_C2 : cgtgagattcaattctatctctgttttagctttcacttaacaaaagtgttacaaacttcggttctaccgaaagggggccggagtatatccttctcgatt : 500  
 CGTGAGATTCAATTCTATATCTTGTTTAGCTTTCACTTAACAAAAGTTTACCAAACCTCCGTTCTACCGAAAGGGGGCCGGAGTATATCCTTCTCGATT

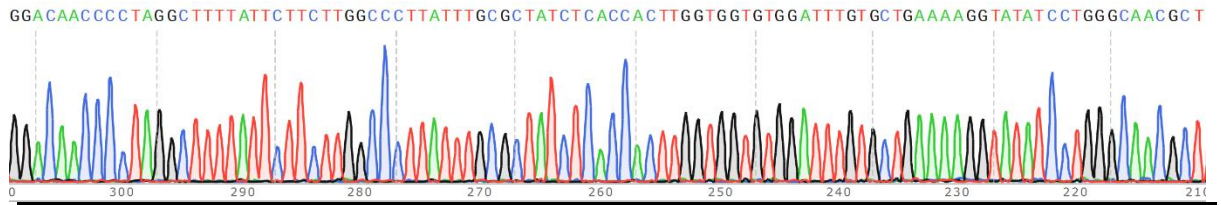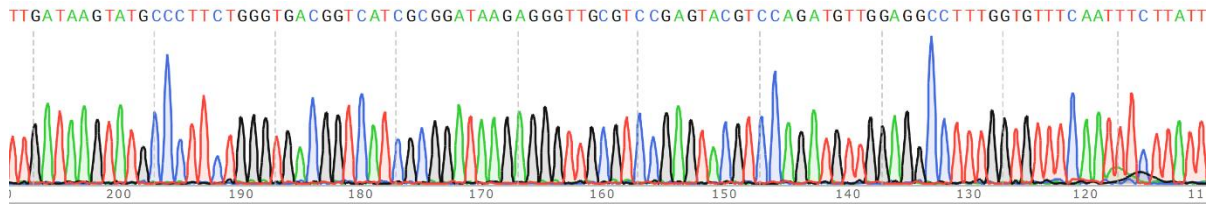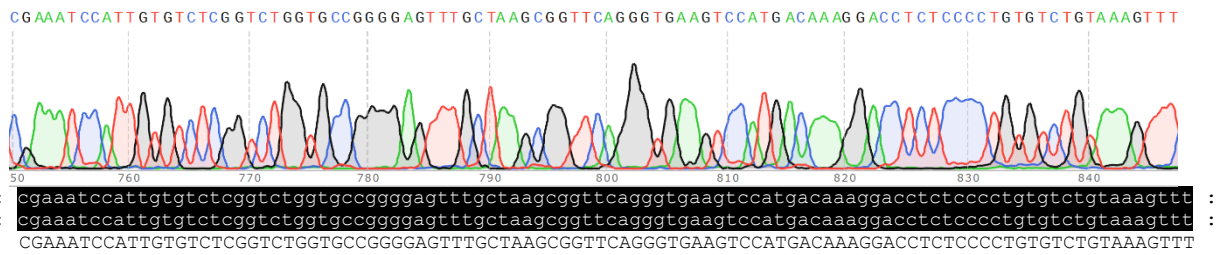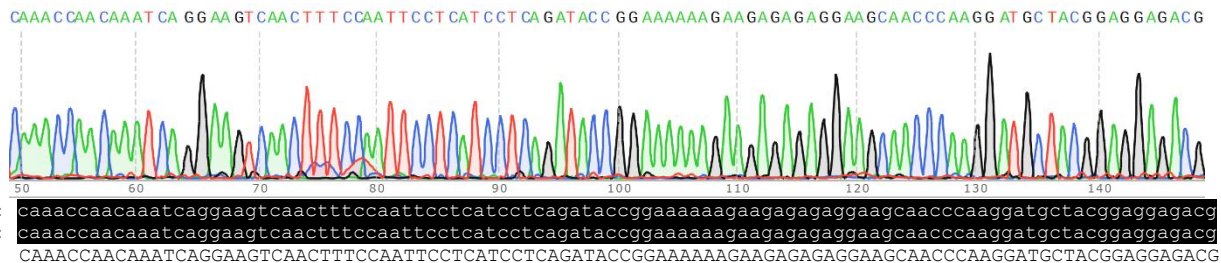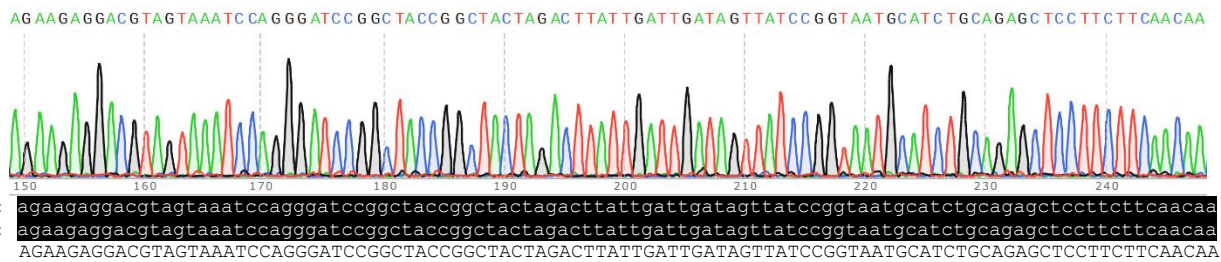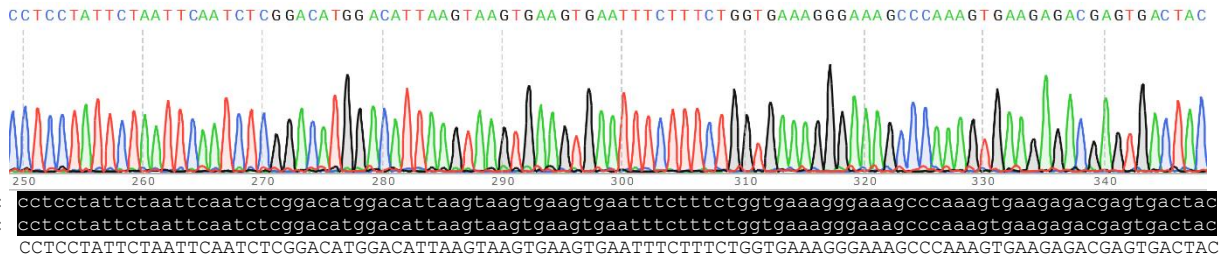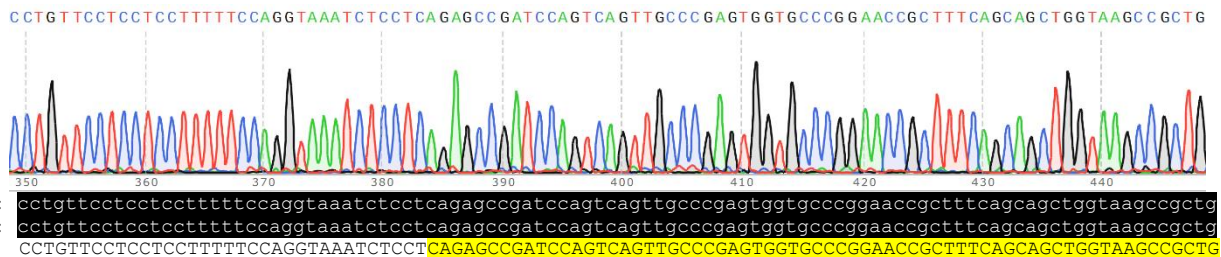



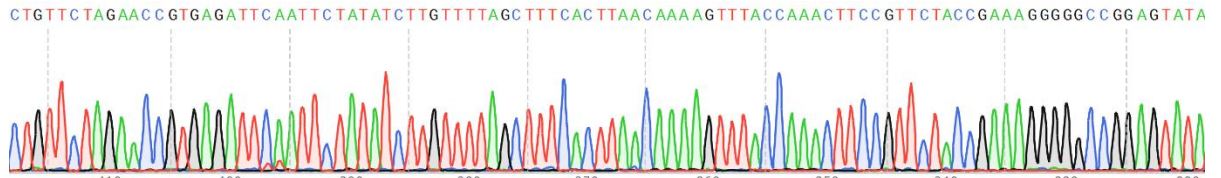

PCR\_C3 : ctgttctagaaccgtgagattcaattctatatcttgttttagctttcacttaacaaaagtttac : 500  
r06\_C3 : ctgttctagaaccgtgagattcaattctatatcttgttttagctttcacttaacaaaagtttac : 500  
CTGTTCTAGAACCGTGAGATT ATTCTATATCTTGTTTTAGCTTCACTTAACAAAAGTTTAC AA CTTCGGTTCTACCGAAAAGGGGGCCGGAGTATA

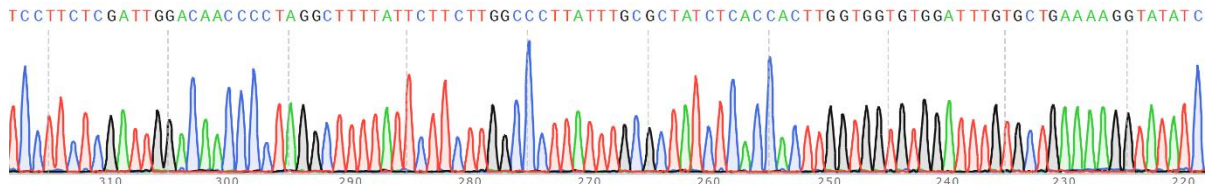

PCR\_C3 : tccttctcgattggacaacccttaggcttttattcttcttggcccttatttgcgctatctcaccacttgggtggtgtggatttgtgctgaaaaggtatatc : 600  
r06\_C3 : tccttctcgattggacaacccttaggcttttattcttcttggcccttatttgcgctatctcaccacttgggtggtgtggatttgtgctgaaaaggtatatc : 600  
TCCCTTCTCGATTGGACAAACCCCTAGGCTTTTATTCTTCTTGGCCCTTATTTGCGCTATCTCACCACTTGGTGGTGTTGATTGTGCTGAAAAAGGTATATC

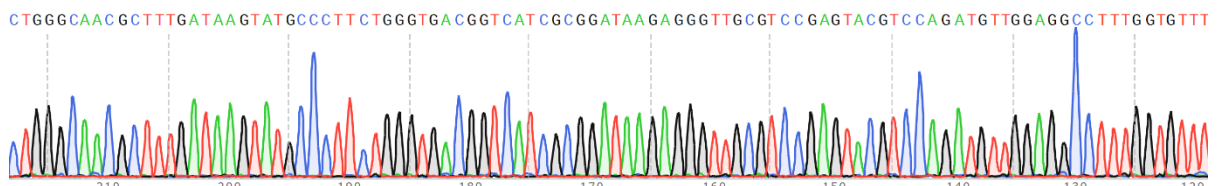

PCR\_C3 : ctgggcaacgctttgataagtatgcccttctgggtgacggtcatcgcgataagagggttgcgtccgagtagctccagatgttggaggcctttggtgttt : 700  
r06\_C3 : ctgggcaacgctttgataagtatgcccttctgggtgacggtcatcgcgataagagggttgcgtccgagtagctccagatgttggaggcctttggtgttt : 700  
CTGGGCAACGCTTTGATAAGTATGCCCTTCTGGGTGACGGTCATCGCGGATAAGAGGGTTGCGTCCGAGTACGTCACAGATGTGGAGGGCCTTTGGTGTTT

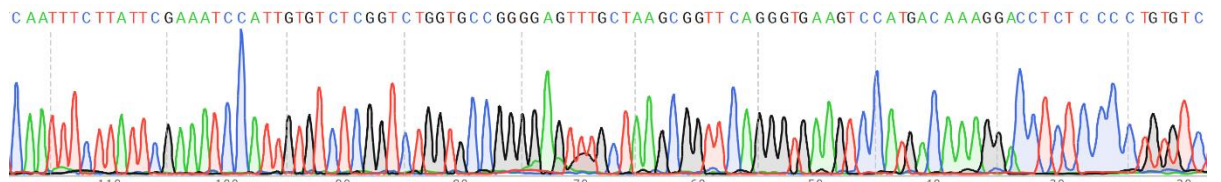

PCR\_C3 : caatttcttatttcgaaatccattgtgtctcgggtcgtggtgacgggagtttgcgaagcgggttcagggtgaagtccatgacaaaggacctctccctgtgtc : 800  
r06\_C3 : caatttcttatttcgaaatccattgtgtctcgggtcgtggtgacgggagtttgcgaagcgggttcagggtgaagtccatgacaaaggacctctccctgtgtc : 800  
CAATTTCTTATTCGAAATCCATTGTGTCTCGGTCGGGTGACGGGTGAAAGTCCATGACAAAGGACCTCTCCCTGTGTCT

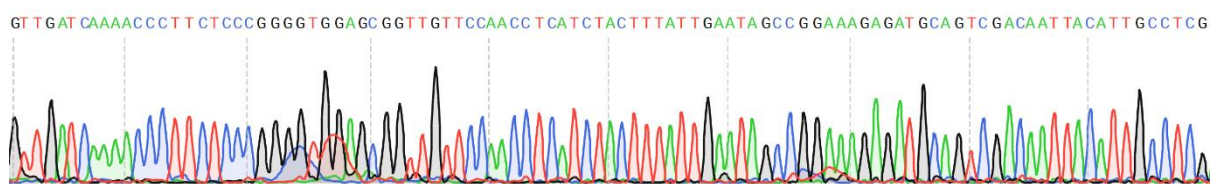

PCR\_C4 : gttgatcaaaaccccttctccggggtggagcgggtgttccaacctcatctactttattgaatagccggaaagagatgcagtcgacaattacattgcctcg : 100  
r06\_C4 : gttgatcaaaaccccttctccggggtggagcgggtgttccaacctcatctactttattgaatagccggaaagagatgcagtcgacaattacattgcctcg : 100  
GTTGATCAAAACCTTCTCCCGGGGTGGAGCGGTTGTTCCAACCTCATCTACTTTATTGAATAGCCGGAAGAGATGCAATGACAAATACATTGCCCTCG

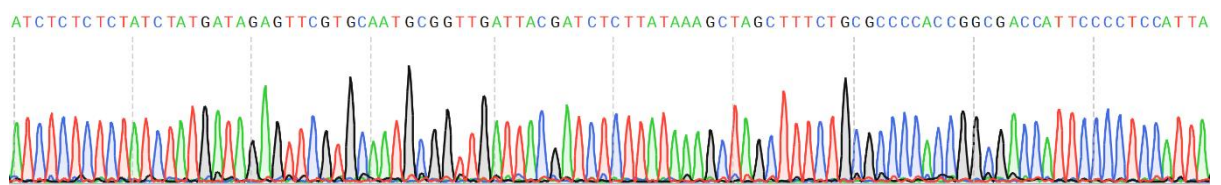

PCR\_C4 : atctctctctatctatgatagagttcgtgcaatgcggttgattacgatctcttataaagctagctttctgccccaccggcgaccattccctccatta : 200  
r06\_C4 : atctctctctatctatgatagagttcgtgcaatgcggttgattacgatctcttataaagctagctttctgccccaccggcgaccattccctccatta : 200  
ATCTCTCTATCTATGATAGAGTTCTGCGGATGCGGTTGATTACGATCTCTTATAAAGCTAGCTTTCTGCGCCCCACCGGCGACCATTCCTCCATT

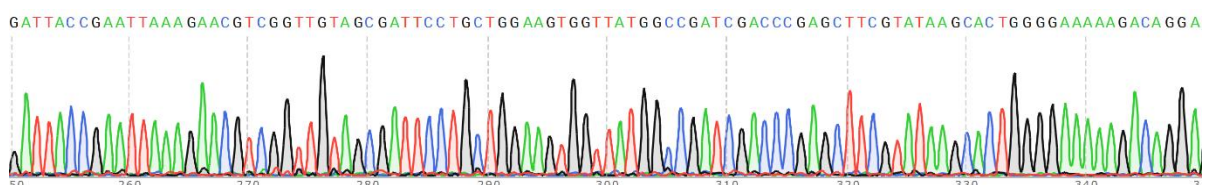

PCR\_C4 : gattaccgaattaaagaacgtcgggttgtagcattcctgctggaagtgggtatggccgatcgaccgagcttcgtataagcaactggggaaaaagacagga : 300  
r06\_C4 : gattaccgaattaaagaacgtcgggttgtagcattcctgctggaagtgggtatggccgatcgaccgagcttcgtataagcaactggggaaaaagacagga : 300

GATTACCGAATTAAAGAACGTCGGTTGTAGCGATTCTGCTGGAAGTGGTTATGGCCGATCGACCCGAGCTTCGTATAAGCACTGGGGAAAAAGACAGGA

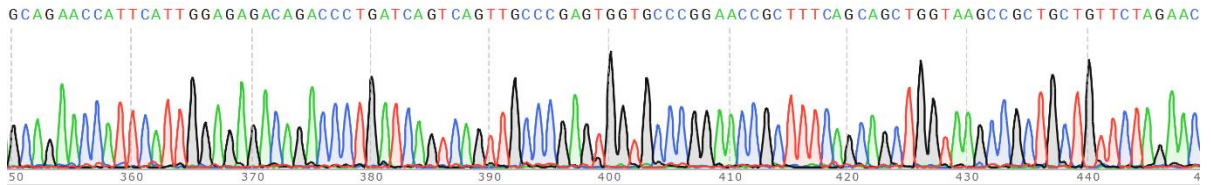

PCR\_C4 : gcagaaccatttcatttgagagacagaccctgatcagtcagttgcccagtggtgcccggaaaccgctttcagcagctggtaagccgctgctgttctagaac : 400  
r06\_C4 : gcagaaccatttcatttgagagacagaccctgatcagtcagttgcccagtggtgcccggaaaccgctttcagcagctggtaagccgctgctgttctagaac : 400  
GCAGAACCATTTCATTGGAGAGACAGACCCTGATCAGTCAGTTGCCCGAGTGGTGCCCGGAACCGCTTTCAGCAGCTGGTAAGCCGCTGCTGTTCTAGAAC

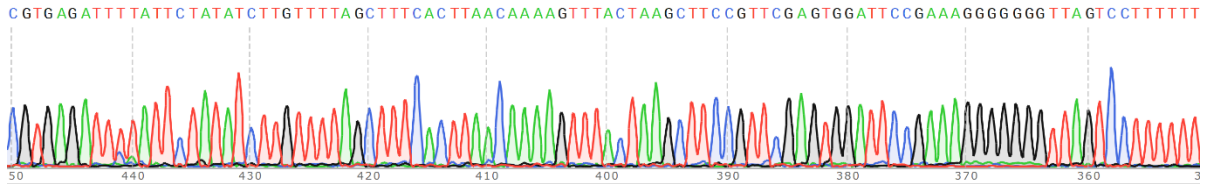

PCR\_C4 : cgtgagattttattctatatcttgttttagctttcacttaacaaaagtttactaaagcttccggttcgagtggtattccgaaagggggttagtcctttttt : 500  
r06\_C4 : cgtgagattttattctatatcttgttttagctttcacttaacaaaagtttactaaagcttccggttcgagtggtattccgaaagggggttagtcctttttt : 500  
CGTGAGATT ATTCTATATCTTGTTTTAGCTTTCACCTTAACAAAAGTTTAC AA CTTCGGTTGAGTGGATTCCGAAAGGGGGGTTAGTCCTTTTTT

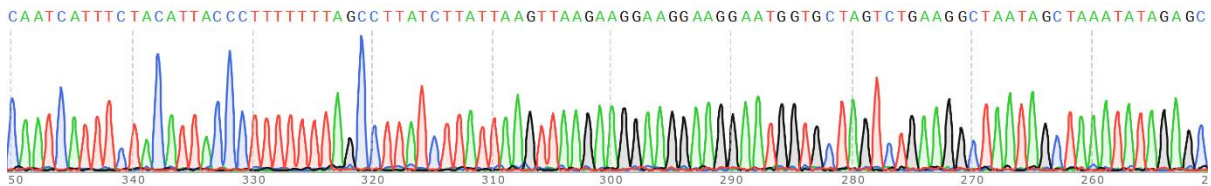

PCR\_C4 : caatcattttctacattacccttttttagccttatcttattaaagtaagaaggaaggaaggaatggtgctagtctgaaggctaataagctaaatatagagc : 600  
r06\_C4 : caatcattttctacattacccttttttagccttatcttattaaagtaagaaggaaggaaggaatggtgctagtctgaaggctaataagctaaatatagagc : 600  
CAATCATTCTACATTACCCTTTTTTTAGCCTTATCTTATTAAGTTAAGAAGGAAGGAAGGAATGGTGTAGTCTGAAGGCTAATAGCTAAATATAGAGC

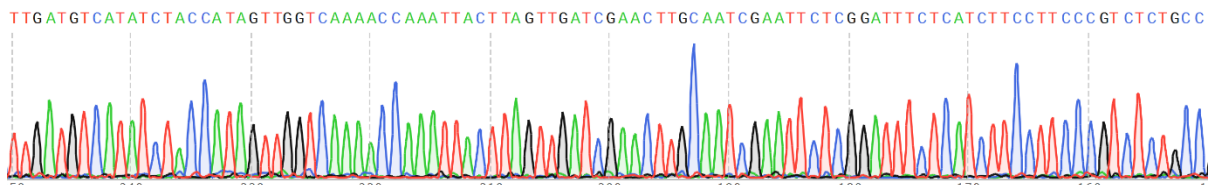

PCR\_C4 : ttgatgtcatatctaccatagttggtcaaaaccaaattacttagttgatcgaaacttgcaatcgaaattctcggatttctcatcttcttcccgctctctgcc : 700  
r06\_C4 : ttgatgtcatatctaccatagttggtcaaaaccaaattacttagttgatcgaaacttgcaatcgaaattctcggatttctcatcttcttcccgctctctgcc : 700  
TTGATGTCAATCTACCATAGTTGGTCAAAACCAAATTACTTAGTTGATCGAACTTGCAATCGAATTCTCGGATTTCATCATCTTCCTTCCCGTCTCTGCC

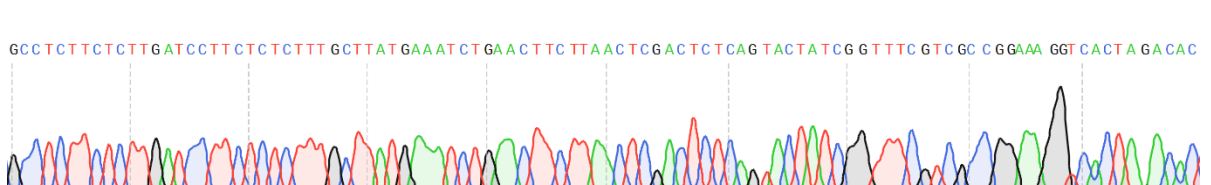

PCR\_C4 : gccctcttctcttgatccttctctctttgcttatgaaatctgaacttcttaactcgactctcagtaactatcggtttcgctcgccggaaggtcactagacac : 800  
r06\_C4 : gccctcttctcttgatccttctctctttgcttatgaaatctgaacttcttaactcgactctcagtaactatcggtttcgctcgccggaaggtcactagacac : 799  
GCCCTCTCTCTTGATCCTTCTCTTTGCTTATGAAATCTGAACCTCTTAACTCGACTCTCAGTACTATCGGTTTCGTCGCCGG AAGGTCACTAGACAC

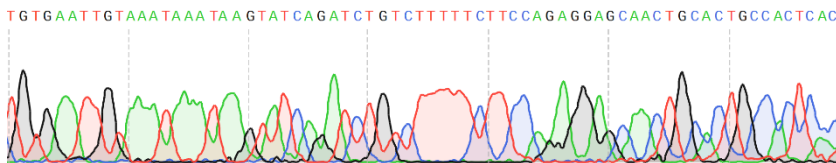

PCR\_C4 : tgtgaattgtaaataaataagatcagatctgtcttttttcttccagaggagcaactgcaactgccactcac : 870  
r06\_C4 : tgtgaattgtaaataaataagatcagatctgtcttttttcttccagaggagcaactgcaactgccactcac : 869  
TGTGAATTGTAAATAAATAAGTATCAGATCTGTCTTTTCTTCCAGAGGAGCAACTGCACTGCCACTCAC



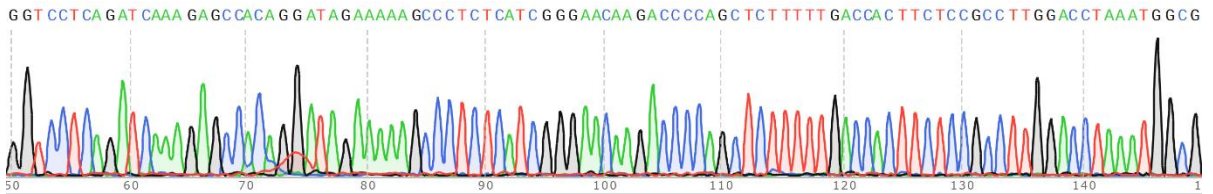

PCR\_C1 : ggctcctcagatcaaagagccacaggatagaaaaagccctctcatcggaacaagacccagctcttttgaccacttctccgccttggacctaaatggcg : 100  
 r07\_C1 : ggctcctcagatcaaagagccacaggatagaaaaagccctctcatcggaacaagacccagctcttttgaccacttctccgccttggacctaaatggcg : 100  
 GGTCTCAGATCAAAGAGCCACAGGATAGAAAAAGCCCTCTCATCGGGAACAAGACCCAGCTCTTTTGACCACCTTCCGCCTTGGACCTAAATGGCG

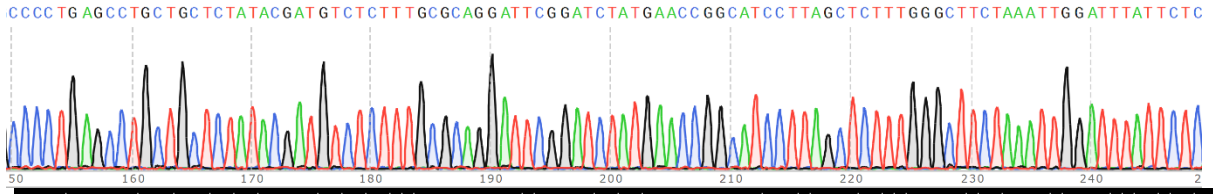

PCR\_C1 : cccctgagcctgctgctctatacagatgtctctttgcgaggattcggtatctatgaaccggcatccttagctctttgggcttctaaattggatttattctc : 200  
 r07\_C1 : cccctgagcctgctgctctatacagatgtctctttgcgaggattcggtatctatgaaccggcatccttagctctttgggcttctaaattggatttattctc : 200  
 CCCCTGAGCCTGCTGCTCTATACGATGTCTCTTTCGCGAGGATTCGGATCTATGAACCGGCATCCTTAGCTCTTTGGGCTTCTAAATTGGATTTATTCTC

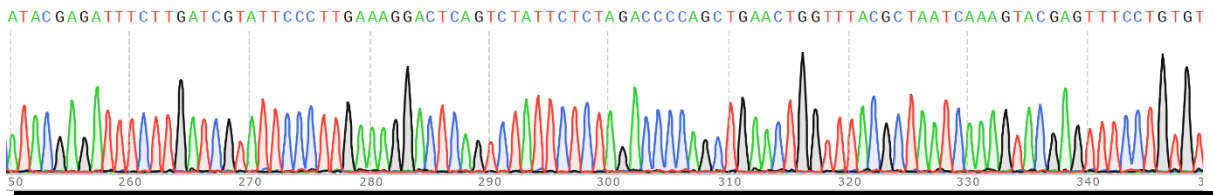

PCR\_C1 : atacgagatttcttgatcgatttcccttgaaaggactcagtcattctctagacccagctgaactggtttacgctaatacaagtagcaggtttcctgtgt : 300  
 r07\_C1 : atacgagatttcttgatcgatttcccttgaaaggactcagtcattctctagacccagctgaactggtttacgctaatacaagtagcaggtttcctgtgt : 300  
 ATACGAGATTCTTGATCGTATTCCCTTGAAAGGACTCAGTCTATTCTCTAGACCCAGCTGAACGGTTTACGCTAATCAAAGTACGAGTTTCTGTGT

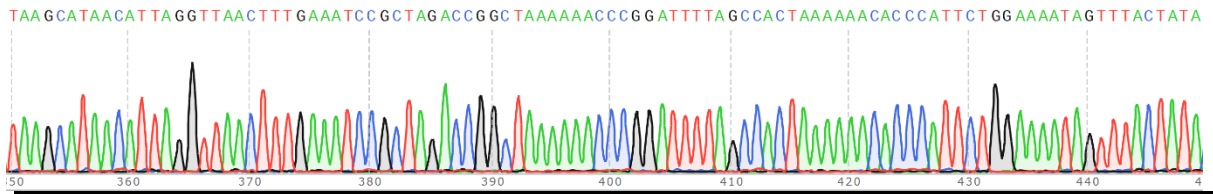

PCR\_C1 : taagcataacattaggttaactttgaaatccgctagaccggctaaaaaacccggattttagccactaaaaaacaccattcttgaaaaatagtttactata : 400  
 r07\_C1 : taagcataacattaggttaactttgaaatccgctagaccggctaaaaaacccggattttagccactaaaaaacaccattcttgaaaaatagtttactata : 400  
 TAAGCATAACATTAGGTAACTTTGAAATCCGCTAGACCGCTAAAAAACCCGGATTTTAGCCACTAAAAAACACCCCATTTCTGGAAAAATAGTTTACTATA

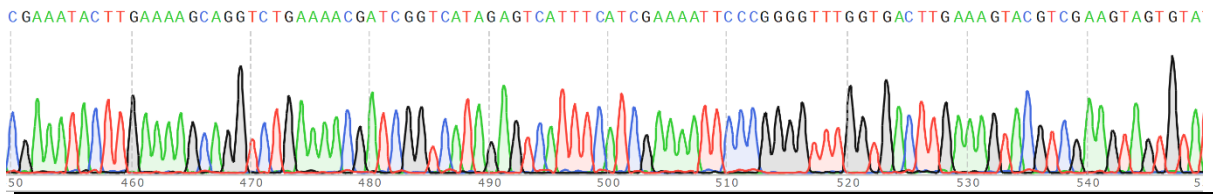

PCR\_C1 : cgaataacttgaaaagcaggtctgaaaacgatcggtcatagagtcatttcacgaaaattcccggggtttggtagcttgaaagtacgtcgaagttagtga : 500  
 r07\_C1 : cgaataacttgaaaagcaggtctgaaaacgatcggtcatagagtcatttcacgaaaattcccggggtttggtagcttgaaagtacgtcgaagttagtga : 500  
 CGAAATACCTTGAAAAGCAGGTCTGAAAACGATCGGTATAGAGTCATTCATCGAAAATTCCCGGGGTTTGGTGACTTGAAAGTACGTGAAGTAGTGTGA

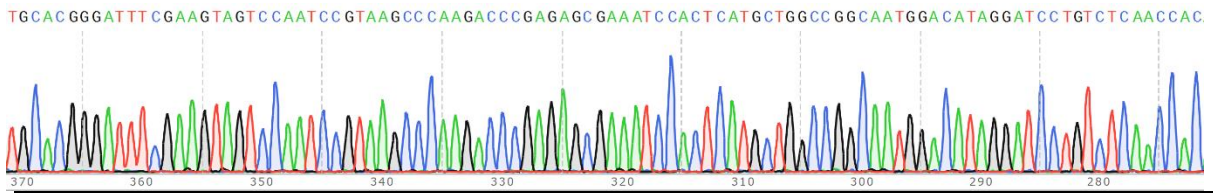

PCR\_C1 : tgcacgggatttcgaagttagtccaatccgtaagcccaagacccgagagcgaaatccactcatgctggccggcaatggacataggatcctgtctcaaccac : 600  
 r07\_C1 : tgcacgggatttcgaagttagtccaatccgtaagcccaagacccgagagcgaaatccactcatgctggccggcaatggacataggatcctgtctcaaccac : 600  
 TGCACGGGATTTCGAAGTAGTCCAATCCGTAAGCCCAAAGACCCGAGAGCGAAATCCACTCATGCTGGCCGGCAATGGACATAGGATCCTGTCTCAACCAC

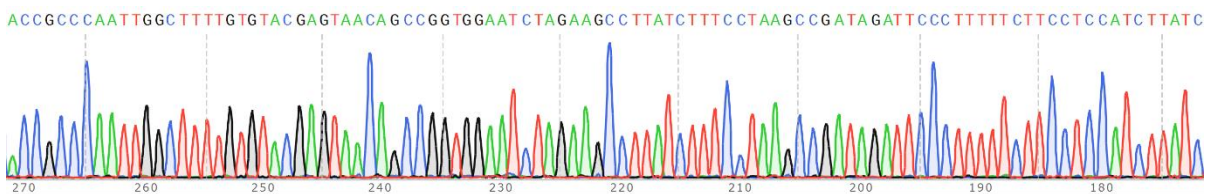

PCR\_C1 : accgcccatttggtctttgtgtacgagtaaacagccggtggaatctagaagccttatctttcctaagccgatagattccctttttcttccatcattatc : 700  
 r07\_C1 : accgcccatttggtctttgtgtacgagtaaacagccggtggaatctagaagccttatctttcctaagccgatagattccctttttcttccatcattatc : 700  
 ACCGCCCAATTGGCTTTTGTGTACGAGTAACAGCCGGTGAATCTAGAAGCCTTATCTTTCCCTAAGCCGATAGATTCCCTTTTCTTCTCCTCATCTTATC

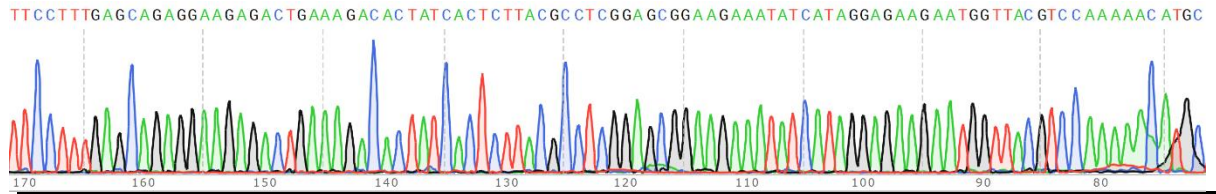

PCR\_C1 : ttctttgagcagaggaagagactgaaagacactatcactcttacgctcggagcggaagaatatcataggagaagaatggttacgtccaaaaacatgc : 800  
 r07\_C1 : ttctttgagcagaggaagagactgaaagacactatcactcttacgctcggagcggaagaatatcataggagaagaatggttacgtccaaaaacatgc : 800  
 TTCTTTGAGCAGAGGAGAGACTGAAAGACACTATCACTCTTACGCTCTGGAGCGGAGAGAAATATCATAGGAGAGGAATGGTTACGTCCAAAAACATGC

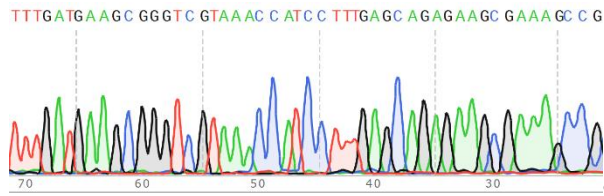

PCR\_C1 : tttgatgaagcgggtcgtaaacatcctttgagcagagaagcgaagccg : 850  
 r07\_C1 : tttgatgaagcgggtcgtaaacatcctttgagcagagaagcgaagccg : 850  
 TTTGATGAGCGGGTCGTAACACATCCCTTTGAGCAGAGAAGCGAAGCCG

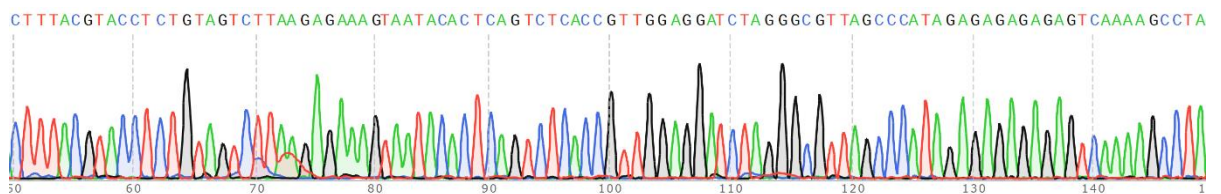

PCR\_C2 : ctttacgtacctctgtagtcttaagagaaagtaatacactcagttctaccggttgaggatctaggggcgttagcccatagagagagagagtcaaaagccta : 100  
 r07\_C2 : ctttacgtacctctgtagtcttaagagaaagtaatacactcagttctaccggttgaggatctaggggcgttagcccatagagagagagagtcaaaagccta : 100  
 CTTTACGTACCTCTGTAGTCTTAAAGAGAAATAATACACTCAGTCTCACC GTTGGAGGATCTAGGGCGTTAGCCCATAGAGAGAGAGTCAAAAGCCTA

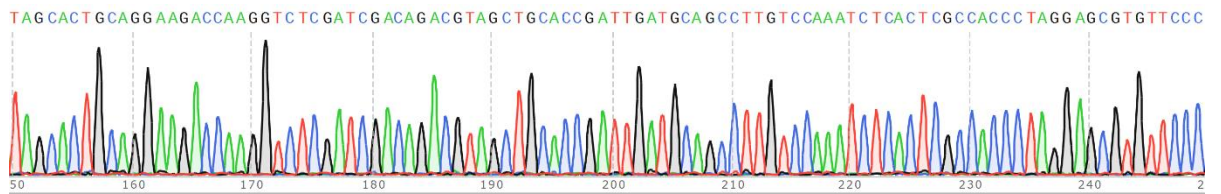

PCR\_C2 : tagcactgcaggaagaccaaggctcgtcgatcgacagacgtagctgcaccgattgatgcagccttgccaaatctcactcgccaccctaggagcgtgttccc : 200  
 r07\_C2 : tagcactgcaggaagaccaaggctcgtcgatcgacagacgtagctgcaccgattgatgcagccttgccaaatctcactcgccaccctaggagcgtgttccc : 200  
 TAGCACTGCAGGAGACCAAGGCTCTCGATCGACAGACGTAGCTGCACCGATTGATGCAACCTTGCCAAATCTCACTCGCCACCCTAGGAGCGTGTTCC

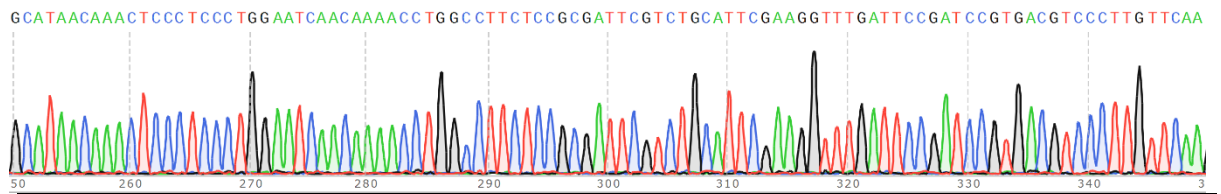

PCR\_C2 : gcataacaaactccctccctggaatcaacaaacctggccttctccgcgattcgctgcattcgaaaggtttgattccgatccgtgacgtccctgttcaa : 300  
 r07\_C2 : gcataacaaactccctccctggaatcaacaaacctggccttctccgcgattcgctgcattcgaaaggtttgattccgatccgtgacgtccctgttcaa : 300  
 GCATAACAACTCCCCTCCCTGGAATCAACAAACCTGGCCTTCTCCGCGATTGCTGCAATCGAAGGTTTGATTCCGATCCGTGACGTCCCTGTTCAA

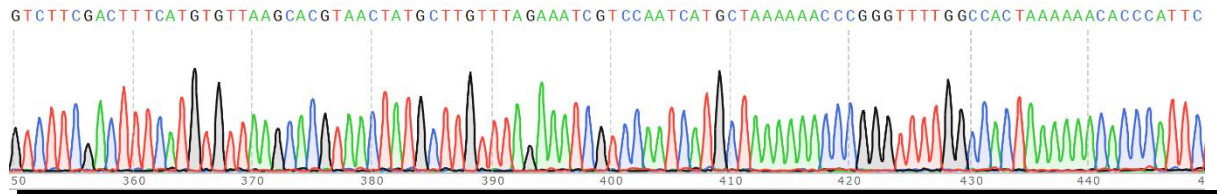

PCR\_C2 : gtcttcgactttcatgtgttaagcacgtaactatgcttggtttagaatcgccaatcatgctaaaaaacccgggttttggccactaaaaaacacccattc : 400  
 r07\_C2 : gtcttcgactttcatgtgttaagcacgtaactatgcttggtttagaatcgccaatcatgctaaaaaacccgggttttggccactaaaaaacacccattc : 400  
 GTCTTCGACTTTCATGTGTTAAGCACGTAACATATGCTTGTTTGAATTCGTCAAATCATGCTAAAAACCCGGTGGCCACTAAAAACACCCATTTC

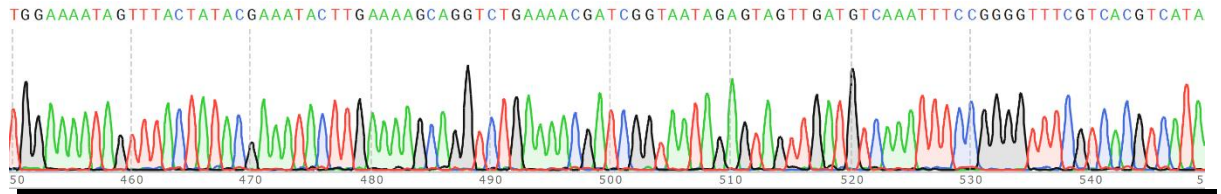

PCR\_C2 : tggaaaaatagtttactatacgaaatacttgaaaagcaggtctgaaaacgatcggtaatatagtagttgatgtcaaatccggggtttcgtcacgtcata : 500  
 r07\_C2 : tggaaaaatagtttactatacgaaatacttgaaaagcaggtctgaaaacgatcggtaatatagtagttgatgtcaaatccggggtttcgtcacgtcata : 500  
 TGGAAAAATAGTTTACTATACGAAATAC TTGAAAAGCAGGCTGAAAACGATCGGTAATAGAGTAGTTGATGTCAAATTTCCGGGTTTCGTACGTCATA



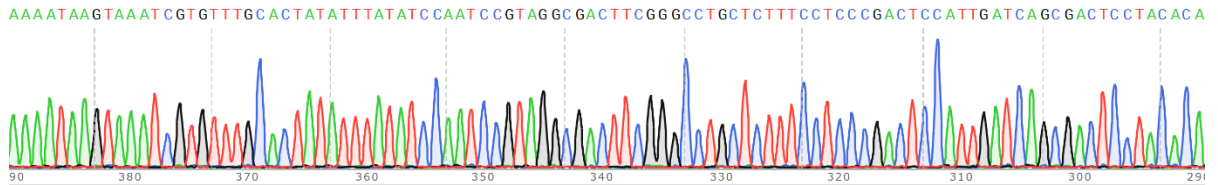

PCR\_C2 : aaataagtaaatcggtgttgcactatatttatccaatccgtaggcgacttcgggcctgctctttctcccgactccattgatcagcgactcctacaca : 600  
 r07\_C2 : aaataagtaaatcggtgttgcactatatttatccaatccgtaggcgacttcgggcctgctctttctcccgactccattgatcagcgactcctacaca : 600  
 AAATAAGTAAATCGTGTTCGACTATATTTATATCAATCCGTAGGCGACTTCGGGCTGCTCTTTCTCCGACTCCATTGATCAGCGACTCTACACA

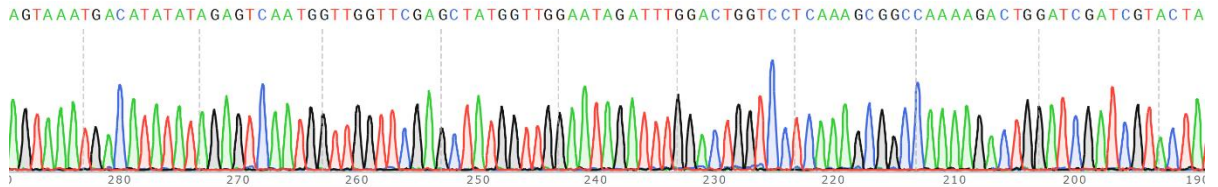

PCR\_C2 : agtaaatgacatatatagagtcaatggttgggttcgagctatggttggaaatagatttggactggctcctcaaagcgGCCAAAAGACTGGATCGATCGTACTA : 700  
 r07\_C2 : agtaaatgacatatatagagtcaatggttgggttcgagctatggttggaaatagatttggactggctcctcaaagcgGCCAAAAGACTGGATCGATCGTACTA : 700  
 AGTAAATGACATATATAGAGTCAATGGTTGGTTCGAGCTATGGTTGGAATAGATTTGGACTGGTCTCCTCAAAGCGGCCAAAAGACTGGATCGATCGTACTA

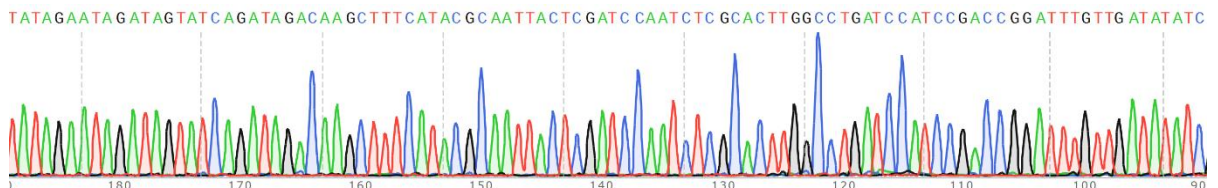

PCR\_C2 : tatagaatagatagatcagatagacaagcttttcacacgaattactcgatccaatctcgcacttggcctgatccatccgacgggatttggatgatatac : 800  
 r07\_C2 : tatagaatagatagatcagatagacaagcttttcacacgaattactcgatccaatctcgcacttggcctgatccatccgacgggatttggatgatatac : 800  
 TATAGAATAGATAGTATCAGATAGACAAAGCTTTTCATACGCAATTACTCGATCCTCCTGATCCATCCGACCGGATTTGTTGATATATC

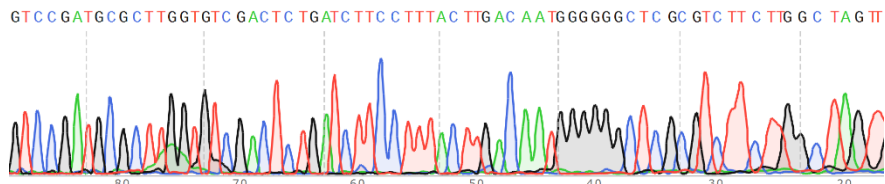

PCR\_C2 : gtccgatgcgcttgggtgtcgactctgatcttcttacttgacaatggggggctcgcgtcttcttggctagtt : 873  
 r07\_C2 : gtccgatgcgcttgggtgtcgactctgatcttcttacttgacaatggggggctcgcgtcttcttggctagtt : 873  
 GTCCGATGCGCTTGGTGTGCACTCTGATCTTCCTTTACTTGGACAAAGGGGGGCTCGCGTCTTCTGGCTAGTT

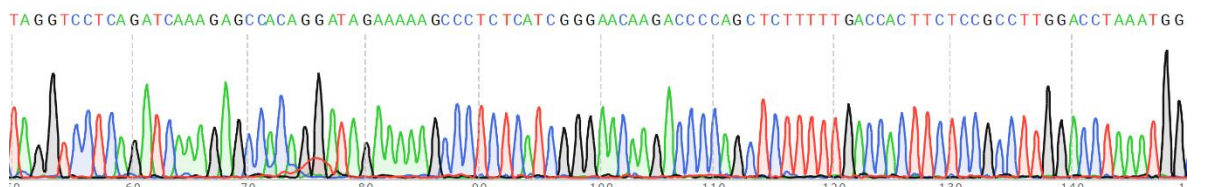

PCR\_C3 : taggtcctcagatcaaaagccacaggatagaaaaagccctctcatcgggaacaagacccagctctttttgaccacttctccgcttggacctaataatgg : 100  
 r07\_C3 : taggtcctcagatcaaaagccacaggatagaaaaagccctctcatcgggaacaagacccagctctttttgaccacttctccgcttggacctaataatgg : 100  
 TAGGTCCTCAGATCAAAAGGCCACAGGATAGAAAAAGCCCTCTCATCGGGAACAAGACCCAGCTCTTTTGACCACCTCTCCGCTTGGACCTAAATGG

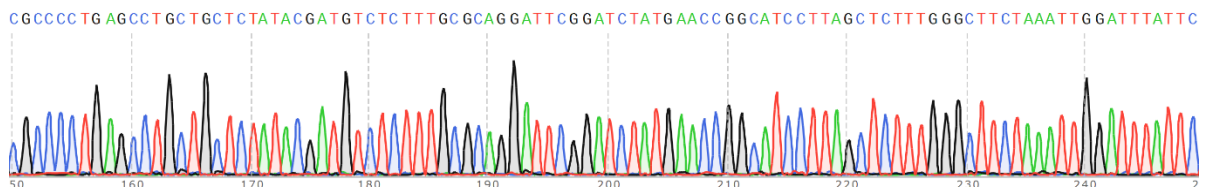

PCR\_C3 : cgcccttgagcctgctgctctatacagatgtctcttggcgcaggattcggatctatgaaccggcatccttagctcttgggcttctaataatggatttatcc : 200  
 r07\_C3 : cgcccttgagcctgctgctctatacagatgtctcttggcgcaggattcggatctatgaaccggcatccttagctcttgggcttctaataatggatttatcc : 200  
 CGCCCCTGAGCCTGCTGCTCTATACGATGCTCTTTGCGCAGGATTGCGATCTATGAACCGGCATCCTTAGCTCTTTGGGCTTCTAAATTGGATTATTC

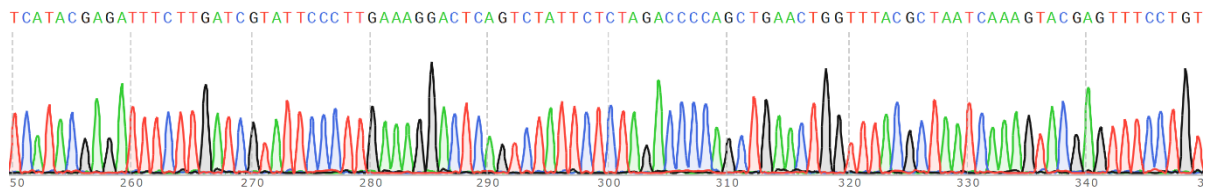

PCR\_C3 : tcatacagagattttctgatcgattcccttgaaggactcagctctattctctagacccagctgaactggtttacgctaatacaagtagagtttctgt : 300  
 r07\_C3 : tcatacagagattttctgatcgattcccttgaaggactcagctctattctctagacccagctgaactggtttacgctaatacaagtagagtttctgt : 300

TCATACGAGATTTCTTGATCGTATTCCTTGAAAGGACTCAGTCTATTCTCTAGACCCAGCTGAACTGGTTTACGCTAATCAAAGTACGAGTTTCCTGT

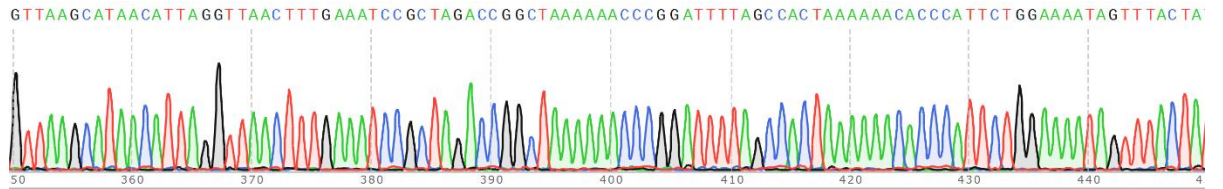

PCR\_C3 : gttaagcataacattaggttaactttgaaatccgctagaccggctaaaaaacccggattttagccactaaaaaacaccattctggaaaaatagtttacta : 400  
r07\_C3 : gttaagcataacattaggttaactttgaaatccgctagaccggctaaaaaacccggattttagccactaaaaaacaccattctggaaaaatagtttacta : 400  
GTTAAGCATAACTTAAAGTTAACTTTGAAATCCGCTAGACCGGCTAAAAACCCGATTTTAGCCACTAAAAACACCCATTCTGGAAAAATAGTTTACTA

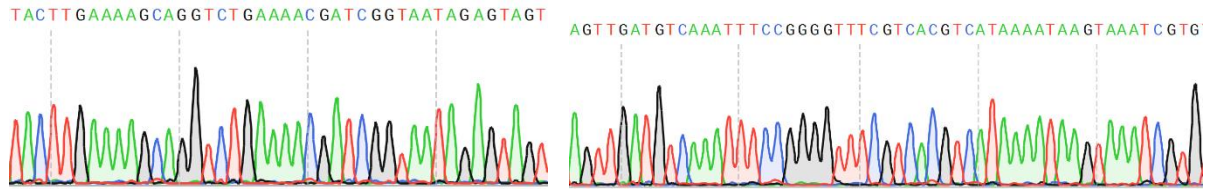

PCR\_C3 : tacgaaataacttgaaaagcagggtctgaaaacgatcggtaaatagagt-agttgatgtcaaatttccgggggtttgtcacgtcataaaaaatagtaaatcgtg : 499  
r07\_C3 : tacgaaataacttgaaaagcagggtctgaaaacgatcggtaaatagagtcaattcatcgaaaattccgggggtttgtgacgtcataaaaaatagtaaatcgtg : 500  
TACGAAATACTTGAAAAGCAGGCTGAAAACGATCGGT ATAGAGT A TT AT AAATT CCGGGGTTT GT ACGTCATAAAATAAGTAAATCGTG

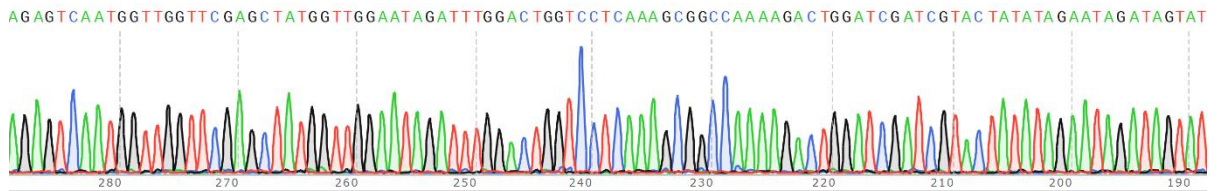

PCR\_C3 : ttgacactatatttatatccaatccgtaggcgacttcgggctgctctttctcccgactccattgatcagcgactcctacacaagtaaatgacatatat : 599  
r07\_C3 : ttgacactatatttatatccaatccgtaggcgacttcgggctgctctttctcccgactccattgatcagcgactcctacacaagtaaatgacatatat : 600  
TTTGCACATATATTATATCCAATCCGTAGGCGACTTCGGGGCTGTCTTCTCCTCCGACTCCATTGATCAGCGACTCCTACACAAGTAAATGACATATAT

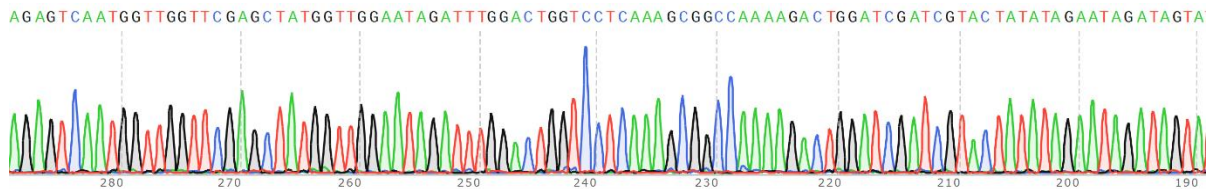

PCR\_C3 : agagtcgaatgggttggttcgagctatggttggaaatagatttggaactggctcctcaaagcggccaaaagactggatcgatcgctactatataatagatagta : 699  
r07\_C3 : agagtcgaatgggttggttcgagctatggttggaaatagatttggaactggctcctcaaagcggccaaaagactggatcgatcgctactatataatagatagta : 700  
AGAGTCAATGGTTGGTTGAGCTATGGTTGGAATAGATTGGACTGGTCTCAAAGCGGCCAAAAGACTGGATCGATCGTACTATATAGAAATAGATAGTA

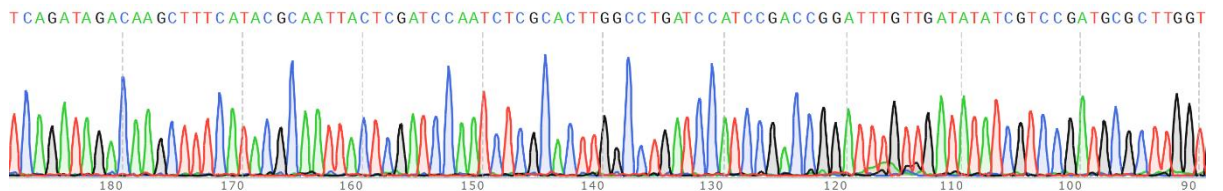

PCR\_C3 : tcagatagacaagctttcatacgaattactcgatccaatctcgcacttgccctgatccatccgaccggatttggtgatatatcgccgatgcgcttggt : 799  
r07\_C3 : tcagatagacaagctttcatacgaattactcgatccaatctcgcacttgccctgatccatccgaccggatttggtgatatatcgccgatgcgcttggt : 800  
TCAGATAGACAAGCTTTCATACGAATTACTCGATCCAATCTCGCACTTGGCTTGATCCATCCGACCGGATTTGTTGATATATCGTCCGATGCGCTTGGT

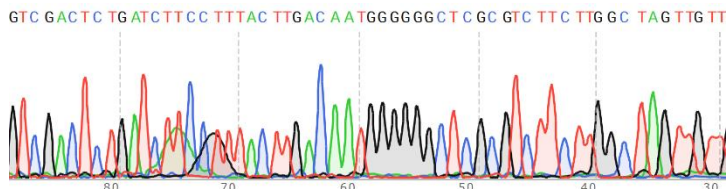

PCR\_C3 : gtcgactctgatcttcccttacttgacaatggggggctcgcgtcttcttggetagttggt : 859  
r07\_C3 : gtcgactctgatcttcccttacttgacaatggggggctcgcgtcttcttggetagttggt : 859  
GTCGACTCTGATCTTCCCTTTACTTGACAAAT GGGGGGCTCGCGTCTTCTTGGCTAGTTGTT



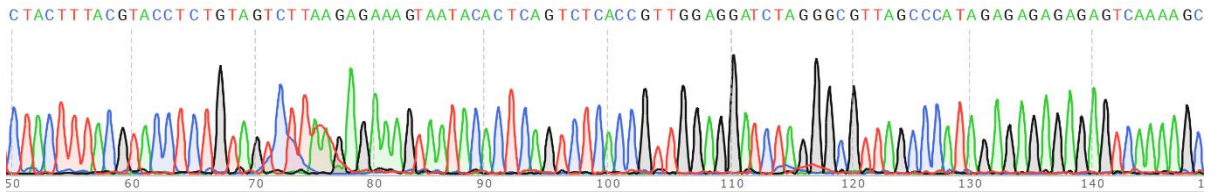

PCR\_C4 : ctactttacgtacacctctgtagtcttaagagaaagtaatacactcagtcacccgttgaggagatctagggcggttagcccatagagagagagagtcaaaagc : 100  
 r07\_C4 : ctactttacgtacacctctgtagtcttaagagaaagtaatacactcagtcacccgttgaggagatctagggcggttagcccatagagagagagagtcaaaagc : 100  
 CTACTTTACGTACCTCTGTAGTCTTAAGAGAAAGTAATACACTCAGTCTCACCGTTGGAGGATCTAGGGCGTTAGCCCATAGAGAGAGAGTCAAAAGC

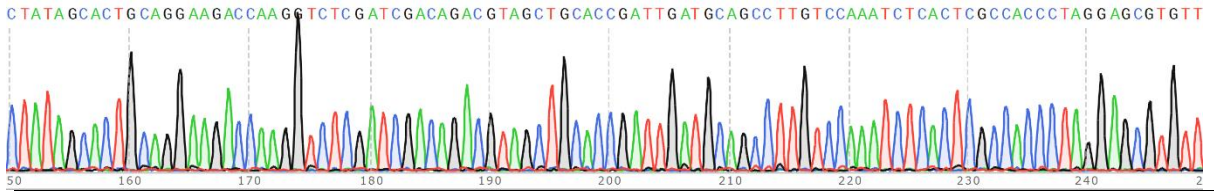

PCR\_C4 : ctatagcactgcaggaagaccaaggtctcgatcgacagacgtagctgcaccgattgatgcagccttggtccaaatctcactcgccacccttaggagcgtgtt : 200  
 r07\_C4 : ctatagcactgcaggaagaccaaggtctcgatcgacagacgtagctgcaccgattgatgcagccttggtccaaatctcactcgccacccttaggagcgtgtt : 200  
 CTATAGCACTGCAGGAAGACCAAGGTCTCGATCGACAGACGTAGCTGCACCGATTGATGCAGCCTTGTCCAAATCTCACTCGCCACCCTAGGAGCGTGT

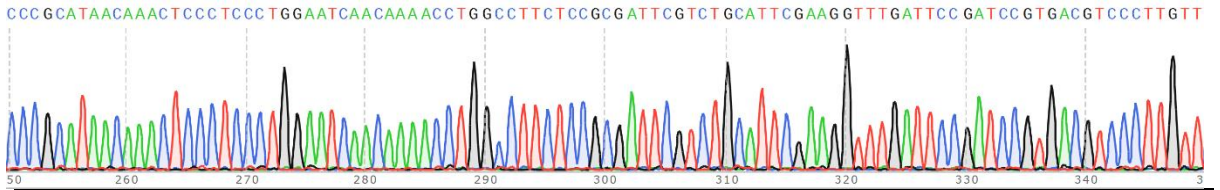

PCR\_C4 : cccgcataaacaactccctccctggaatcaacaaaacctggccttctccgcgattcgctctgcattcgaaggtttgattccgatccgtgacgtcccttgtt : 300  
 r07\_C4 : cccgcataaacaactccctccctggaatcaacaaaacctggccttctccgcgattcgctctgcattcgaaggtttgattccgatccgtgacgtcccttgtt : 300  
 CCCGCATAAACAACCTCCCTCCCTTGGAAATCAACAAAACCTGGCCTTCTCCGCGATTCTGCTGCATTGCAAGGTTTGATTCCGATCCGTGACGTCCCTTGT

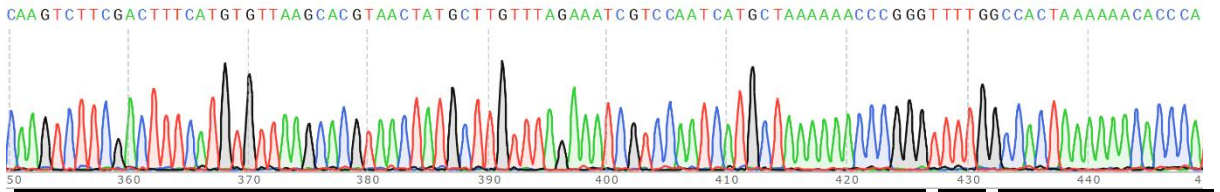

PCR\_C4 : caagtccttcgactttcatgtgttaagcagtaactatgcttgtttagaatcgctccaatcatgctaaaaaacccgggttttggccactaaaaaacaccca : 400  
 r07\_C4 : caagtccttcgactttcatgtgttaagcagtaactatgcttgtttagaatcgctccaatcatgctaaaaaacccgggttttggccactaaaaaacaccca : 400  
 CAAGTCTTCGACTTTTCACTGTGTTAAGCAGCTAACTATGCTTGTTTAGAAATCGTCCAATCATGCTAAAAAACCCGG TTTT GCCACTAAAAAACACCCA

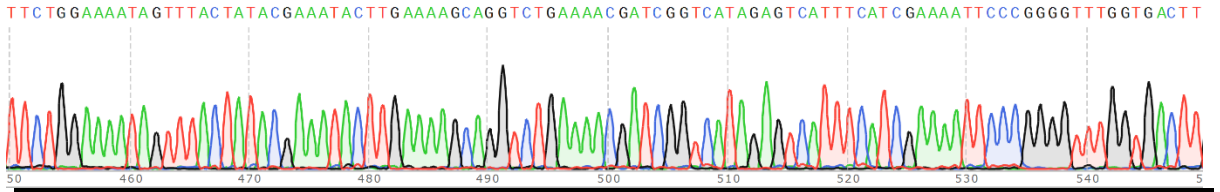

PCR\_C4 : ttctggaaaatagtttactatagcgaatacttgaaaagcaggtctgaaaacgatcggtcatagagtcatttcacgaaaattccccggggttttggtgactt : 500  
 r07\_C4 : ttctggaaaatagtttactatagcgaatacttgaaaagcaggtctgaaaacgatcggtcatagagtcatttcacgaaaattccccggggttttggtgactt : 500  
 TTCTGGAATAAGTATTACTATACGAAATACTTGAAAAGCAGGCTGAAAACGATCGGTTCATAGAGTCATTTCATCGAAAATTCCCGGGGTTTGGTGACTT

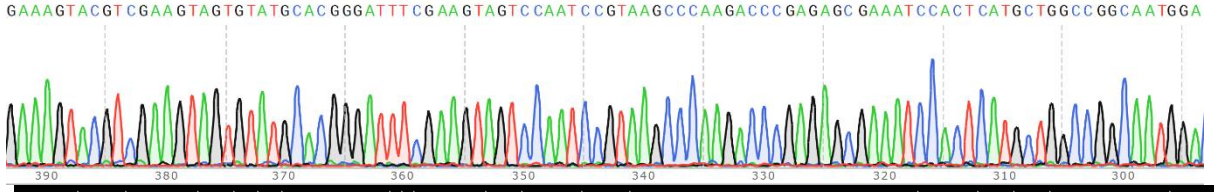

PCR\_C4 : gaaagtacgtcgaagtagtgatgcacgggatttcgaagtagtccaatccgttaagcccaagaccgagagcgaaaatccactcatgtgcccggcaatgga : 600  
 r07\_C4 : gaaagtacgtcgaagtagtgatgcacgggatttcgaagtagtccaatccgttaagcccaagaccgagagcgaaaatccactcatgtgcccggcaatgga : 600  
 GAAAGTACGTGGAAGTAGTGATGCACGGGATTTGGAAGTAGTCCAATCCGTAAAGCCCAAGACCCGAGAGCGAAAATCCACTCATGCTGGCCGGCAATGGA

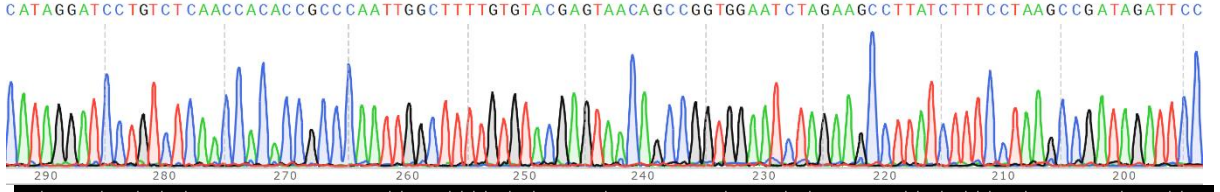

PCR\_C4 : cataggatcctgtctcaaccacaccgcccaattggccttttggtagacgagtaacagccggtggaatctagaagccttatctttcctaagccgatagattcc : 700  
 r07\_C4 : cataggatcctgtctcaaccacaccgcccaattggccttttggtagacgagtaacagccggtggaatctagaagccttatctttcctaagccgatagattcc : 700  
 CATAGGATCCTGTCTCAACCACACCGCCCAATTGGCTTTTGTGTACGAGTAACAGCCGGTGGAACTAGAAAGCCTTATCTTTCCTAAGCCGATAGATTCC

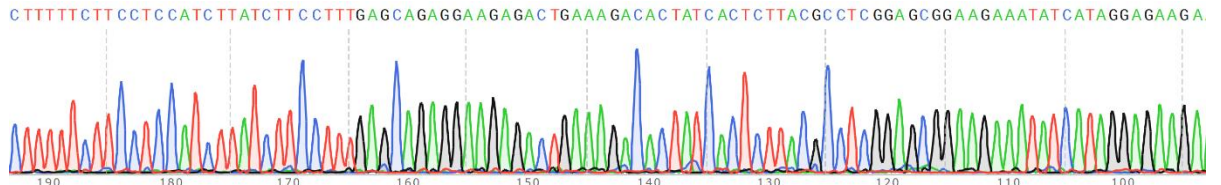

PCR\_C4 : ctttttcttctccatcttattcttctttgagcagaggaagagactgaaagacactatcactcttacgcctcggagcggaagaaatcatagagaaga : 799  
 r07\_C4 : ctttttcttctccatcttattcttctttgagcagaggaagagactgaaagacactatcactcttacgcctcggagcggaagaaatcatagagaaga : 800  
 CTTTTCCTTCTCCATCTTATCTTCCTTTGAGCAGAGGAAGAGACTGAAAGACACTATCACTCTTACGCCTCGGAGCGGAAGAAATATCATAGGAGAAGA

ATGGTTACGTCCAAAAACATGCTTTGATGAAGCGGGTCTGTAACCATCTCTTTGAGCAGAGGAAGCGAAAGCGCTCA

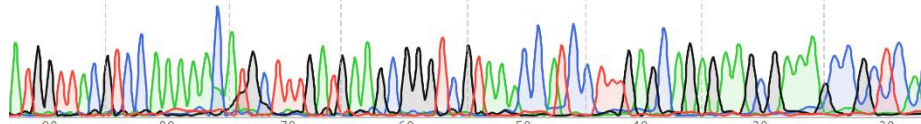

PCR\_C4 : atggttacgtccaaaaacatgctttgatgaagcgggtcgtaaacatctctttgagcagagaagcgaaagccgctca : 876  
 r07\_C4 : atggttacgtccaaaaacatgctttgatgaagcgggtcgtaaacatctctttgagcagagaagcgaaagccgctca : 876  
 ATGGTTACGTCCAAAAACATGCTTTGATGAAGCGGGTCTGTAACCATCTCTTTGAGCAGAGGAAGCGAAAGCGCTCA

h

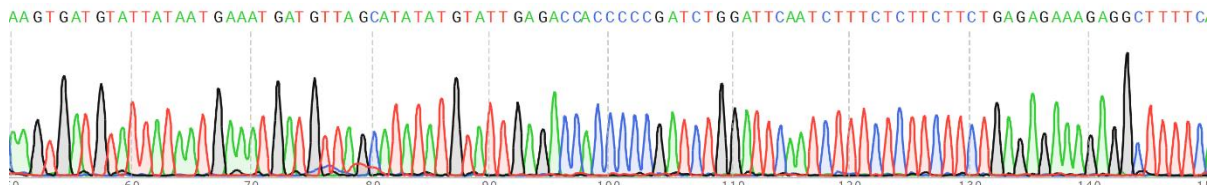

PCR\_C1 : aagtgtatgtattataatgaaatgatggttagcatatatgtattgagaccaccccgatctggattcaatctttctcttctctgagagaaagaggcttttc : 100  
 r08\_C1 : aagtgtatgtattataatgaaatgatggttagcatatatgtattgagaccaccccgatctggattcaatctttctcttctctgagagaaagaggcttttc : 100  
 AAGTGATGTATTATAATGAAATGATGTTAGCATATATGTATTGAGACCAACCCCGATCTGGATTCAATCTTTCTCTTCTCTGAGAGAAAGAGGCTTTTC

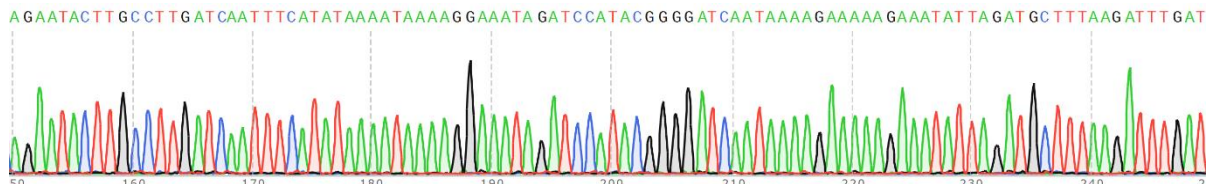

PCR\_C1 : agaatacttgcttgatcaatttcataataaaataaaaggaaatagatccatacggggatcaataaaagaaaaagaaatattagatgctttaagatttgat : 200  
 r08\_C1 : agaatacttgcttgatcaatttcataataaaataaaaggaaatagatccatacggggatcaataaaagaaaaagaaatattagatgctttaagatttgat : 200  
 AGAATACTTGCCTTGATCAATTTTCATATAAAATAAAAGGAAATAGATCCATACGGGGATCAATAAAAGAAAAAGAAATATTAGATGCTTTAAGATTGAT

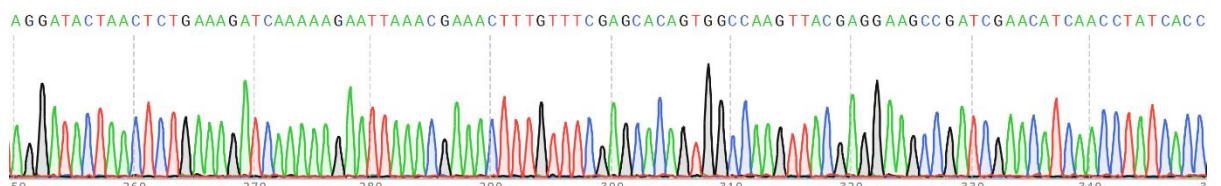

PCR\_C1 : aggatactaactctgaaagatcaaaaagaattaaacgaaactttgtttcgagcacagtggccaagttacgaggaagccgatcgaaatcaacctatcacc : 300  
 r08\_C1 : aggatactaactctgaaagatcaaaaagaattaaacgaaactttgtttcgagcacagtggccaagttacgaggaagccgatcgaaatcaacctatcacc : 300  
 AGGATACCTAATCTGAAAGATCAAAAAGAAATTAACGAACTTTGTTTCGAGCAGTGCGCCAAAGTTACGAGGAAGCCGATCGAACATCAACCTATCACC

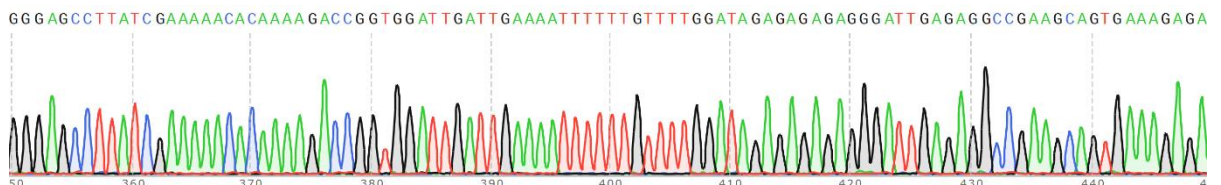

PCR\_C1 : gggagccttatcgaaaaacacaaaagaccggtggattgattgaaaatTTTTTGTGTTGGATAGAGAGAGGGATTGAGAGGCCGAAGCAGTGAAAGAGA : 400  
 r08\_C1 : gggagccttatcgaaaaacacaaaagaccggtggattgattgaaaatTTTTTGTGTTGGATAGAGAGAGGGATTGAGAGGCCGAAGCAGTGAAAGAGA : 400  
 GGGAGCCTTATCGAAAAACAAAAAGACCGGTGGATTGATTGAAATTTTTTGTGTTGGATAGAGAGAGGGATTGAGAGGCCGAAGCAGTGAAAGAGA



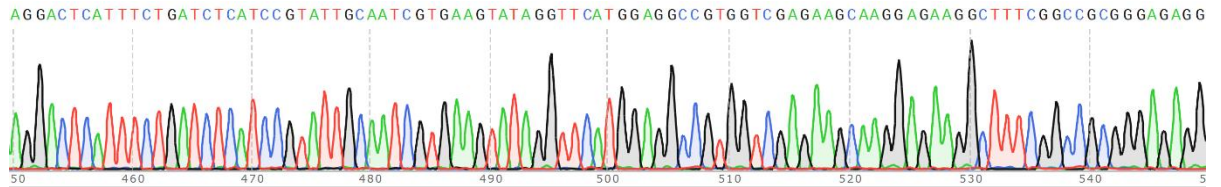

PCR\_C1 : aggactcatttctgatctcatccgtattgcaatcgtgaagtataggttcatggaggccgtggtcgagaagcaaggagaaggctttcggccgcgaggagagg : 500  
 r08\_C1 : aggactcatttctgatctcatccgtattgcaatcgtgaagtataggttcatggaggccgtggtcgagaagcaaggagaaggctttcggccgcgaggagagg : 500  
 AGGACTCATTCTGATCTCATCCGTATTGCAATCGTGAAGTATAGGTTTCATGGAGGCCGTGGTCGAGAAGCAAGGAGAAAGGCTTTCGGCCGCGGGAGAGG

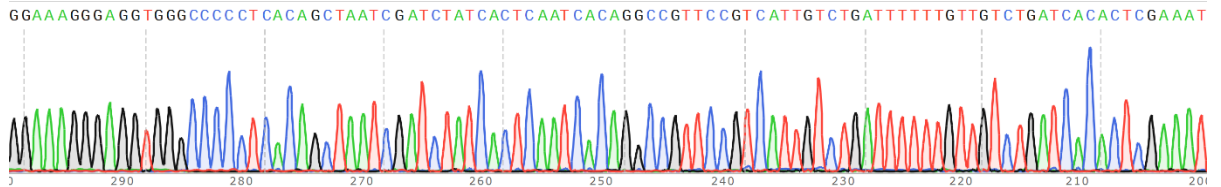

PCR\_C1 : ggaaaggagggtgggccccctcacagctaatacgatctatcaactcaatcacaggccgttccgtcattgtctgatttttgggtgtctgatcacactcgaat : 600  
 r08\_C1 : ggaaaggagggtgggccccctcacagctaatacgatctatcaactcaatcacaggccgttccgtcattgtctgatttttgggtgtctgatcacactcgaat : 600  
 GGAAAGGAGGGTGGGCCCTCACAGCTAATCGATCTCACTCAATCACAGGCCGTTCCGTCATTGTTCTGATTTTGTGTTCTGATCACACTCGAAAT

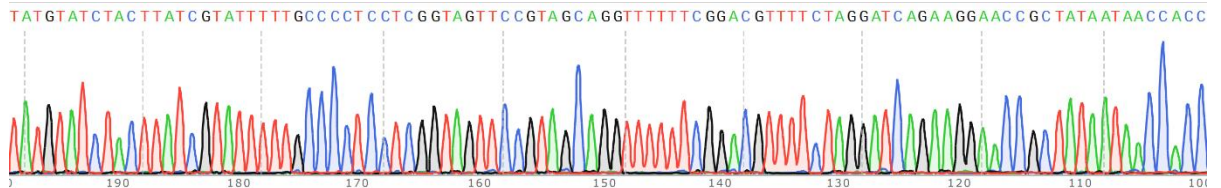

PCR\_C1 : tatgtatctacttatcgatttttgcccctcctcggtagttccgtagcagggtttttcggacgttttctaggatcagaaggaaaccgctataataaccacc : 700  
 r08\_C1 : tatgtatctacttatcgatttttgcccctcctcggtagttccgtagcagggtttttcggacgttttctaggatcagaaggaaaccgctataataaccacc : 700  
 TATGTATCTACTTATCTGATTTTGGCCCTCCTCGGTAGTTCGGTACGACGGTTTTTTCGGACGTTTTCTAGGATCAGAAAGGAACGCTATAATAACCACC

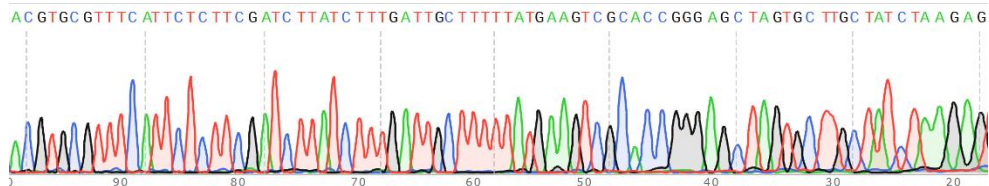

PCR\_C1 : acgtgcggtttcattctcttcgatcttatctttgattgctttttatgaagtcgcacccgggagctagtgttgcattctctaaagag : 782  
 r08\_C1 : acgtgcggtttcattctcttcgatcttatctttgattgctttttatgaagtcgcacccgggagctagtgttgcattctctaaagag : 782  
 ACGTGC GTTTCATTCTCTTCGATCTTATCTTTGATTGCTTTTTATGAAGTCGCACCCGGGAGCTAGTGCTTGCATCTAAGAG

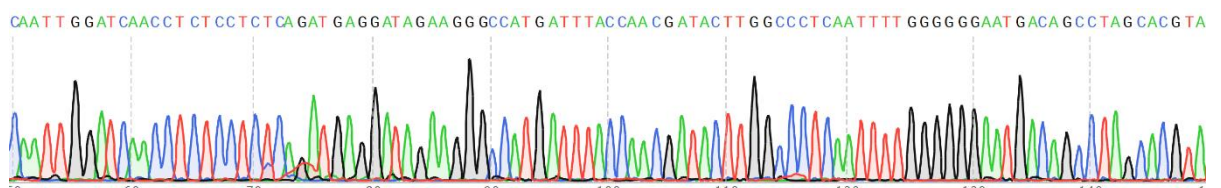

PCR\_C2 : caattggatcaacctctcctcctcagatgaggatagaagggccatgatttaccacgatacttggccctcaattttggggggaatgacagcctagcacgta : 100  
 r08\_C2 : caattggatcaacctctcctcctcagatgaggatagaagggccatgatttaccacgatacttggccctcaattttggggggaatgacagcctagcacgta : 100  
 CAATTGGATCAACCTCTCCTCTCAGATGAGGATGAAAGGGCCATGATTTACCAACGATACCTGGCCCTCAATTTTGGGGGGAATGACAGCCTAGCACGTA

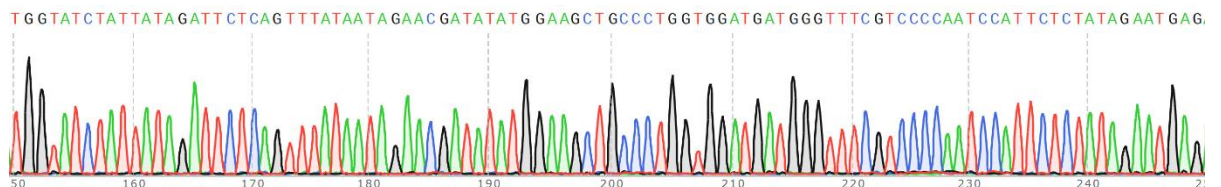

PCR\_C2 : tggatctattatagattctcagtttataatagaacgatataatgaagctgccctgggtggatgatgggtttcgtcccaatccattctctatagaatgag : 200  
 r08\_C2 : tggatctattatagattctcagtttataatagaacgatataatgaagctgccctgggtggatgatgggtttcgtcccaatccattctctatagaatgag : 200  
 TGGTATCTATTATAGATTCTCAGTTTATAATAAGACGATATATGAAGCTGCCCTGGTGGATGATGGGTTTCGTCCCCAATCCATTCTCTATAGAATGAG

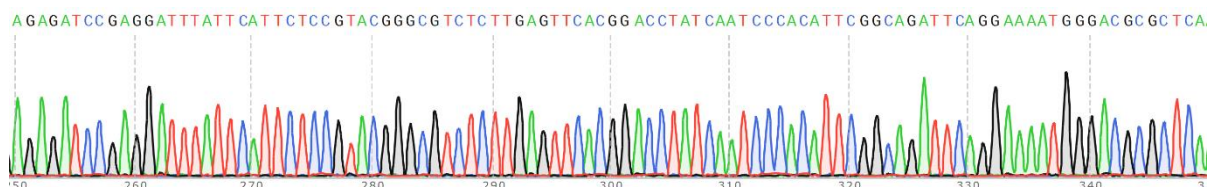

PCR\_C2 : agagatccgaggatttattcattctccgtacggcgctccttgagttcacggacctaataatccacattcggcagattcaggaaaatgggacgcgctca : 300

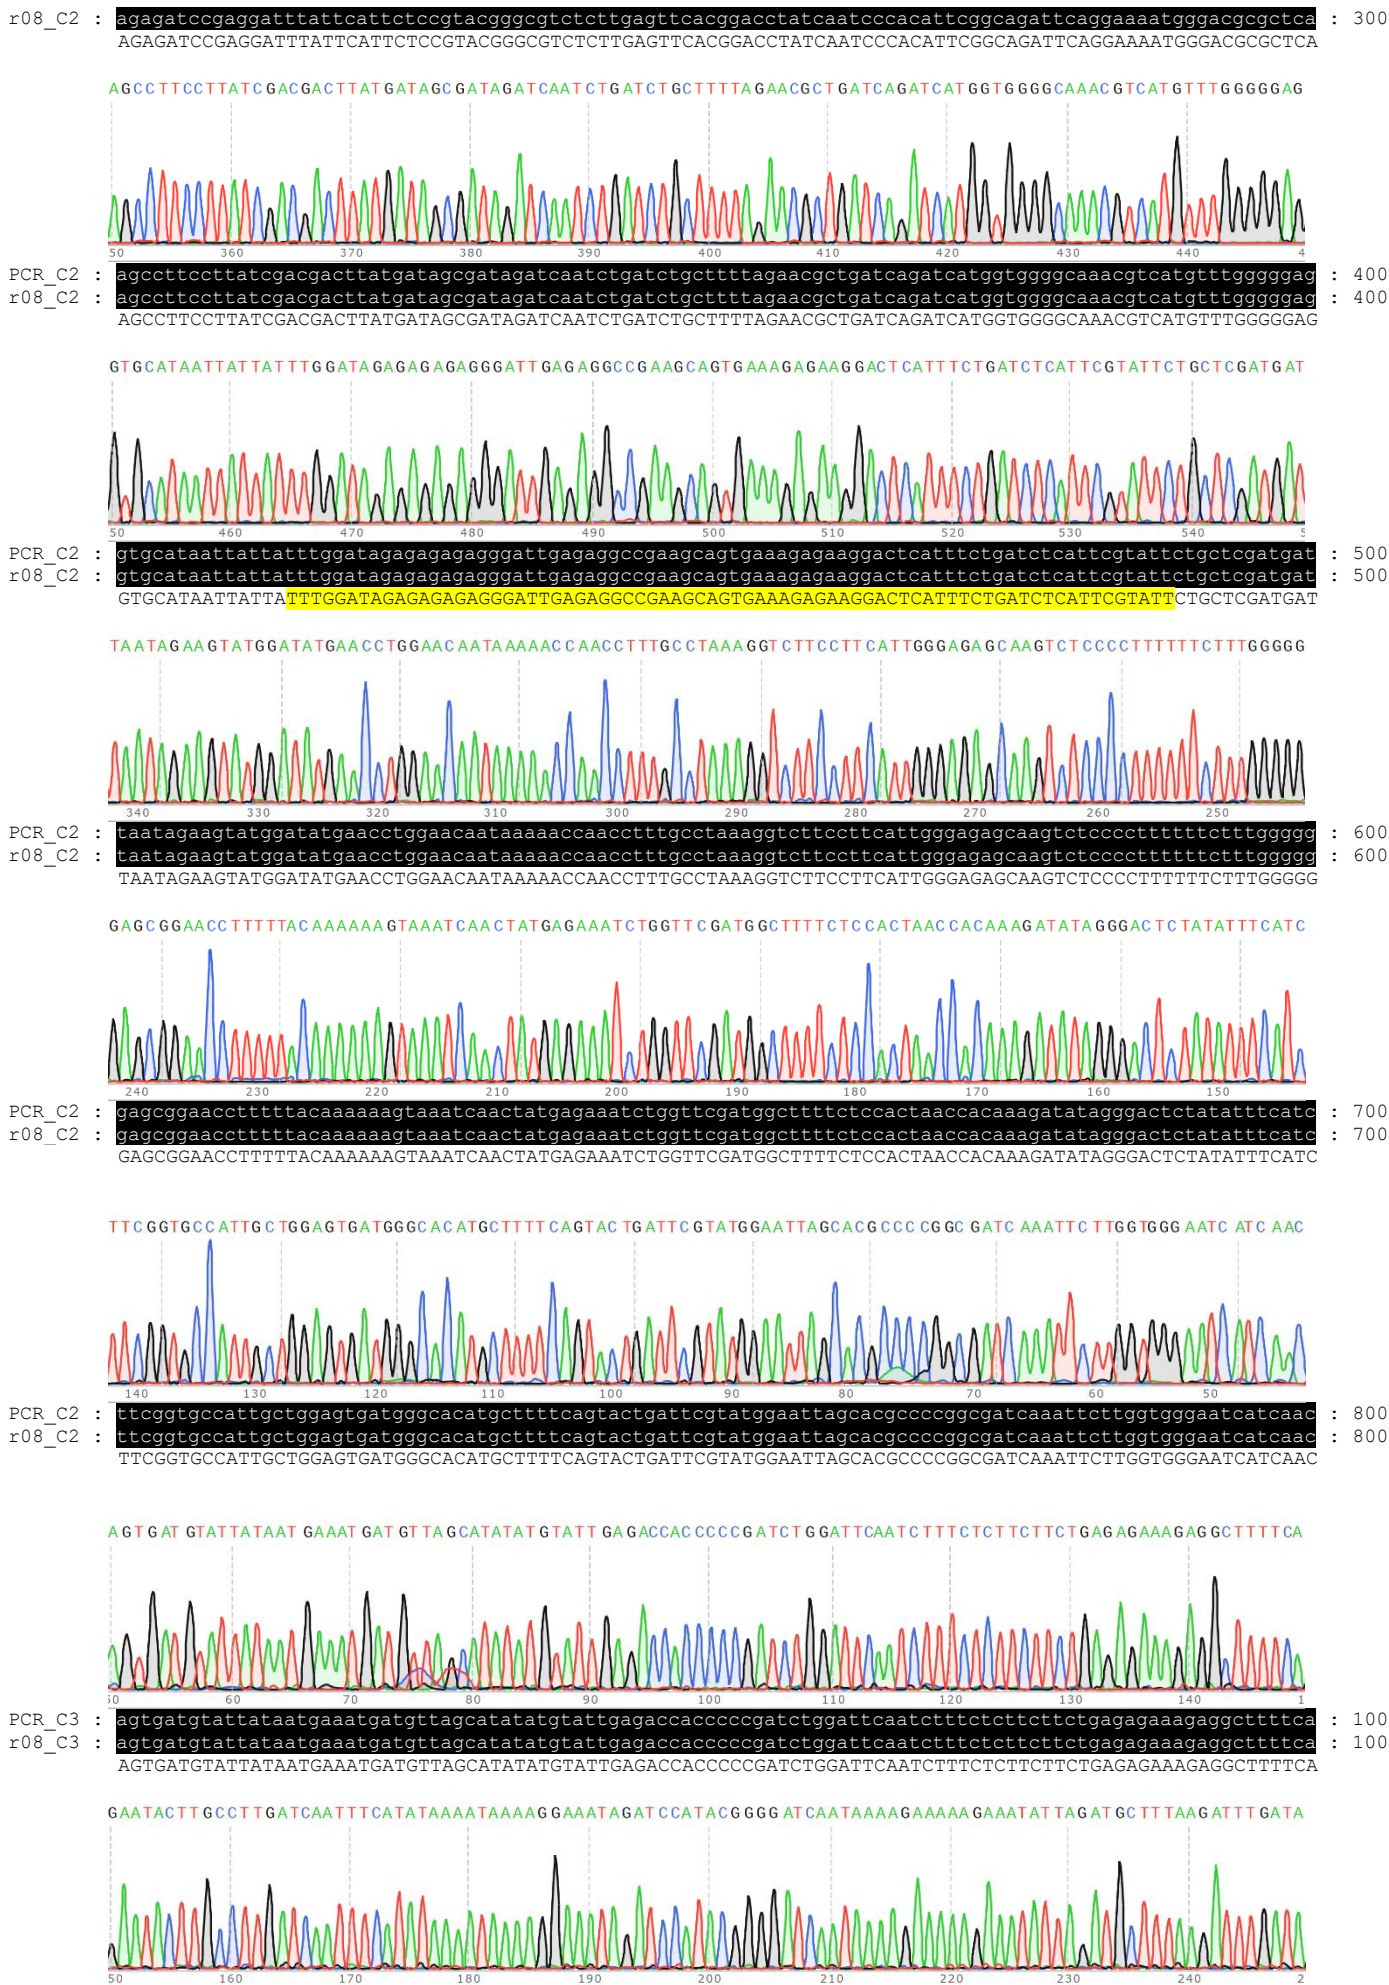



PCR\_C3 : gaataacttgcccttgatcaatttcataataaaataaaaaggaatagatccatacggggatcaataaaagaaaaagaatattagatgctttaagatttgata : 200  
r08\_C3 : gaataacttgcccttgatcaatttcataataaaataaaaaggaatagatccatacggggatcaataaaagaaaaagaatattagatgctttaagatttgata : 200  
GAATACTTGCCTTGATCAATTTTCATATAAAATAAAAGGAATAGATCCATACGGGGATCAATAAAAGAAAAAGAAATATTAGATGCTTTAAGATTGATA

GGATAC TAACTCTG AAAAGATCAAAA GAATTAAACGAAACTTTGTTTCGAGCACAGTG GCCAAGTTACGAGGAGCCGATCGAACATCAACCTATCACCG

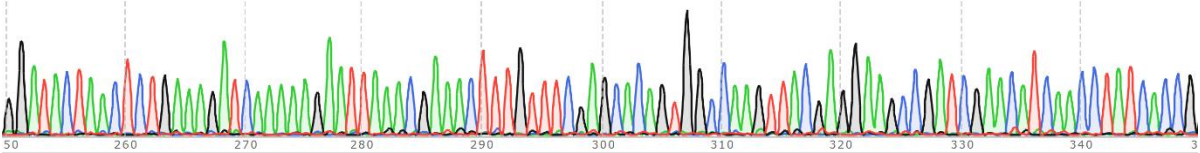

PCR\_C3 : ggataactaactctgaaagatcaaaaagaattaaacgaaactttgttttcgagcacagtgggccaagttaacgaggaagccgatcgaacatcaacctatcaccg : 300  
r08\_C3 : ggataactaactctgaaagatcaaaaagaattaaacgaaactttgttttcgagcacagtgggccaagttaacgaggaagccgatcgaacatcaacctatcaccg : 300  
GGATACTAACTCTGAAAGATCAAAAAGAATTAAACGAAACTTTGTTTCGAGCACAGTGGCCAAGTTACGAGGAAGCCGATCGAACATCAACCTATCACCG

GGAGCCTTATCGAAAAACACAAAAGACCGGTGGATTGATGAAAATTTTTTGTTTTGATAGAGAGAGAGGGATTGAGAGGCCGGAAGCACTGAAAAGAA

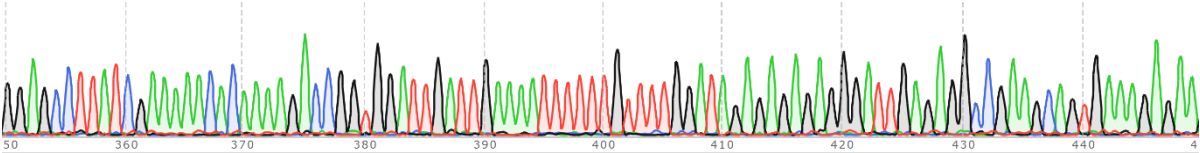

PCR\_C3 : ggagccttatcgaaaaacacaaaagaccggtggattgattgaaaatTTTTTgttttggatagagagagagggattgagaggccgaagcagtgaaagagaa : 400  
r08\_C3 : ggagccttatcgaaaaacacaaaagaccggtggattgattgaaaatTTTTTgttttggatagagagagagggattgagaggccgaagcagtgaaagagaa : 400  
GGAGCCTTATCGAAAAACACAAAAGACCGGTGGATTGATTGAAAATTTTTGT TTTGGATAGAGAGAGGGATTGAGAGGCCGGAAGCAGTGAAAGAGAA

GGACTCATTTCTGATCTCATTCTGATTCTGCTCGATGATTAATAGAGATGGATATGAACCTGGAACAATAAAAAACCAACCTTTGCTAAAGGCTTCTCC

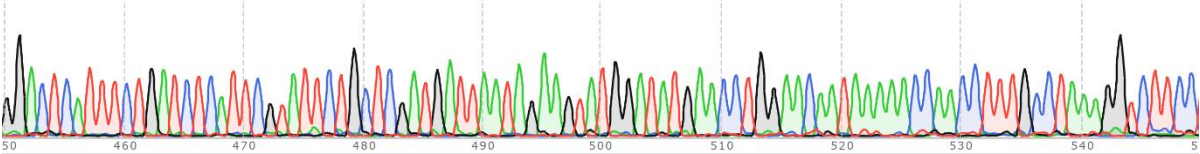

PCR\_C3 : ggactcatttctgatctcattcgctattctgctcgatgattaatagaagtatggatatgaacctggaacaataaaaaccaacctttgcctaaaggtcttcc : 500  
r08\_C3 : ggactcatttctgatctcattcgctattctgctcgatgattaatagaagtatggatatgaacctggaacaataaaaaccaacctttgcctaaaggtcttcc : 500  
GGACTCATTTCTGATCTCAT CGTATTCTGCTCGATGATTAATAGAGATGGATATGAACCTGGAACAATAAAAAACCAACCTTTGCTAAAGGCTTCTCC

TT CATTGGGAGAGCAAGTCTCCCTTTTTTCTTTGGGGGAGCGG AACCTTTTACAAAAAGTAAATCAAC TATGAGAAATCTG6TTG6TGGCTTTTC

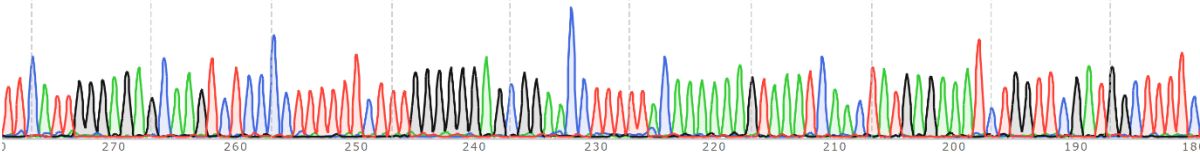

PCR\_C3 : ttcatgggagagcaagctctcccttttttctttgggggagcggaacctttttacaaaaagtaaatcaactatgagaaatctgggttcgatggcttttc : 600  
r08\_C3 : ttcatgggagagcaagctctcccttttttctttgggggagcggaacctttttacaaaaagtaaatcaactatgagaaatctgggttcgatggcttttc : 600  
TTCATTGGGAGAGCAAGTCTCCCTTTTTTCTTTGGGGGAGCGGAACCTTTTACAAAAAGTAAATCAACTATGAGAAATCTGGTTCGATGGCTTTTC

TCCAC TAACCACAAAGATATA GGGACTCTATATTT CATCTT CGGTGCATTGCTG GAGTGATGGGCACATGCTTTT CAGTAC TGATTG GATGGAATTAG

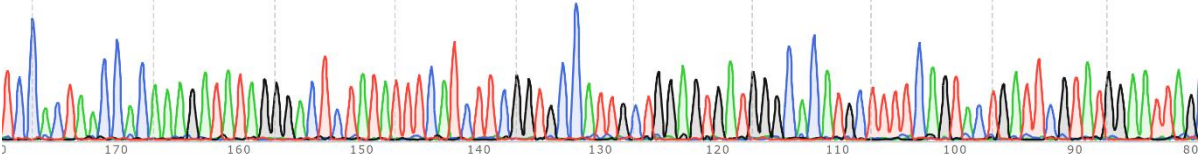

PCR\_C3 : tccactaaccacaaagatatagggactctatatattcatcttcggtgccattgctggagtgatgggcacatgcttttcagtagctgattcgtatggaattag : 700  
r08\_C3 : tccactaaccacaaagatatagggactctatatattcatcttcggtgccattgctggagtgatgggcacatgcttttcagtagctgattcgtatggaattag : 700  
TCCACTAACCACAAAGATATAGGGACTCTATATTTTCATCTTCGGTGCCATTGCTGGAGTGATGGGCACATGCTTTTCAGTACTGATTCGTATGGAATTAG

CACGCCCGGGC GATCAAACTCTTGGTGGGAATC ATC AAC TTTATAATGTTTTAATAAC GGCTC

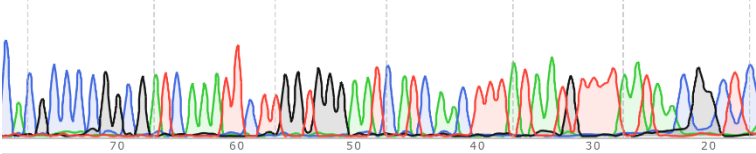

PCR\_C3 : cacgccccggcgatcaaatcttgggtgggaatcatcaactttataatgttttaataacggctc : 763  
r08\_C3 : cacgccccggcgatcaaatcttgggtgggaatcatcaactttataatgttttaataacggctc : 763  
CACGCCCGGGCGATCAAAATCTTGGTGGGAATCATCAACTTTATAATGTTTTAATAACGGCTC

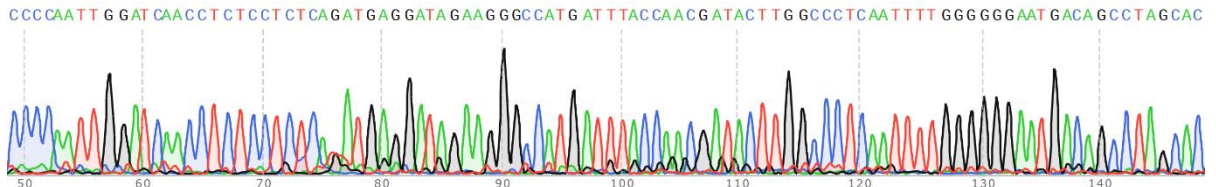

PCR\_C4 : ccccaattggatcaacctctcctctcagatgaggatagaagggccatgatttaccaacgatacttggccctcaattttggggggaatgacagcctagcac : 100  
 r08\_C4 : ccccaattggatcaacctctcctctcagatgaggatagaagggccatgatttaccaacgatacttggccctcaattttggggggaatgacagcctagcac : 100  
 CCCC AATT GGAT CAACCT CTCCT CTCAGAT GAGGATA GAA GGGCCATG ATTTACCAACGATAC TTG GCCCTCAA TTTT GGGGGGAAT GACAGCCTAGCAC

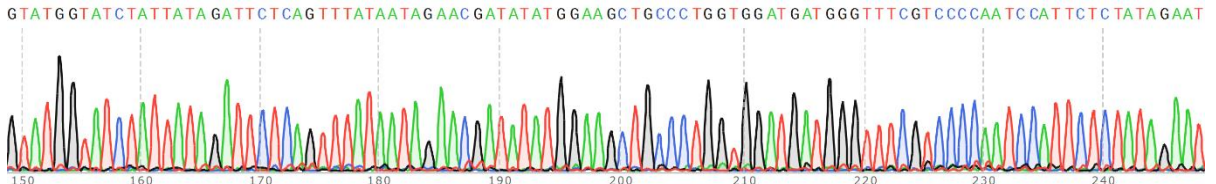

PCR\_C4 : gtatggatctattatagatttctcagtttataatagaacgatataatggaagctgcccctggggtgatgggtttcgtcccaatccattctctatagaat : 200  
 r08\_C4 : gtatggatctattatagatttctcagtttataatagaacgatataatggaagctgcccctggggtgatgggtttcgtcccaatccattctctatagaat : 200  
 GTATGGTATCTATTATAGATTCTCAGTTTATAATAGAACGATATATGGAAGCTGCCCTGGTGGATGATGGGTTTCGTCCCCAATCCATTCTCTATAGAAT

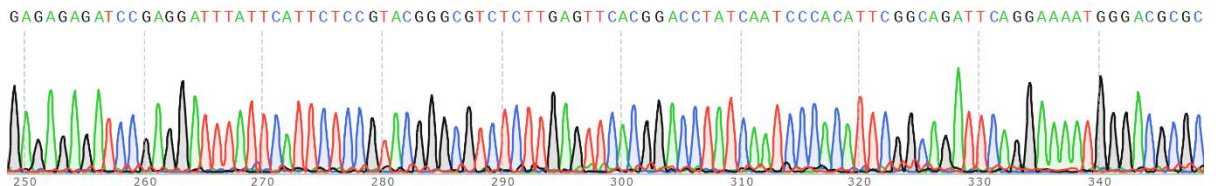

PCR\_C4 : gagagagatccgaggatttattcattctccgtacgggctctcttgagttcacggacctaataatcccacattcggcagattcaggaaaatgggacgcgc : 300  
 r08\_C4 : gagagagatccgaggatttattcattctccgtacgggctctcttgagttcacggacctaataatcccacattcggcagattcaggaaaatgggacgcgc : 300  
 GAGAGAGATCCGAGGATTATTCTCCGTACGGGCTCTCTTGAGTTCACGGACCTATCAATCCACATTCCGCAGATTCAAGAAAATGGGACGCGC

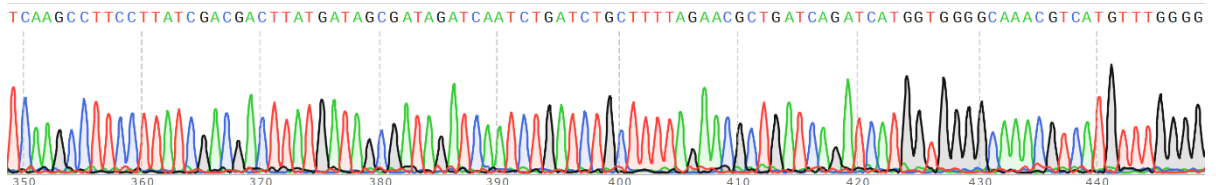

PCR\_C4 : tcaagccttccttatcgacgacttatgatagcgatagatcaatctgatctgcttttagaacgctgatcagatcatggtggggcaaacgtcatgtttgggg : 400  
 r08\_C4 : tcaagccttccttatcgacgacttatgatagcgatagatcaatctgatctgcttttagaacgctgatcagatcatggtggggcaaacgtcatgtttgggg : 400  
 TCAAGCCTTCCTTATCGACGACTTATGATAGCGATAGATCAATCTGATCTGCTTTAGAACGCTGATCAGATCATGGTGGGGCAACGTCATGTTTGGGG

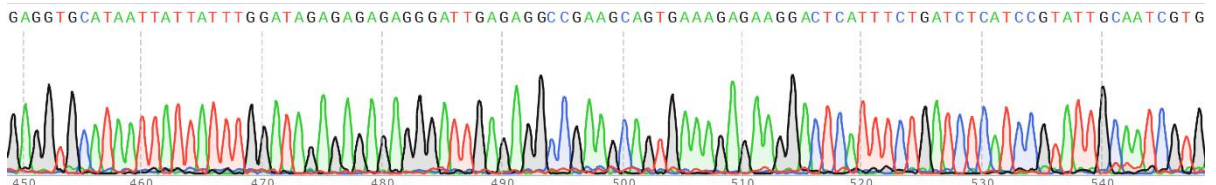

PCR\_C4 : gaggtgcataattatttattggatagagagagaggattgagagggcgaagcagtgaaagagaaggactcatttctgatctcattcgatttgcaatcggtg : 500  
 r08\_C4 : gaggtgcataattatttattggatagagagagaggattgagagggcgaagcagtgaaagagaaggactcatttctgatctcattcgatttgcaatcggtg : 500  
 GAGGTGCATAATTATTA TTTGGATAGAGAGAGAGGGATTGAGAGGCCGAAGCAGTGAAAGAGAAGGACTCATTCTGATCTCAT CGTATTGCAATCGTG

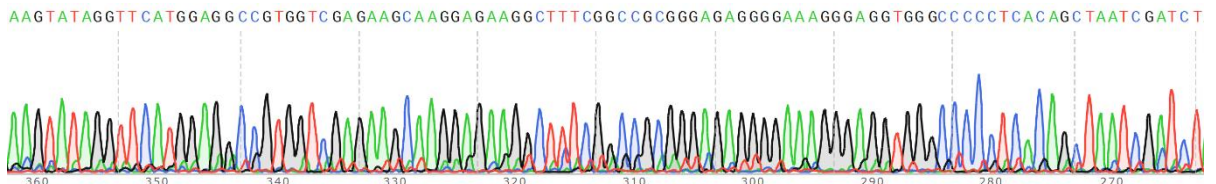

PCR\_C4 : aagtataggttcattggaggccgtgggtcgagaagcaaggagaaggttttcggccgcgggagaggggaaaggagggtgggccccctcacagctaatacgatct : 600  
 r08\_C4 : aagtataggttcattggaggccgtgggtcgagaagcaaggagaaggttttcggccgcgggagaggggaaaggagggtgggccccctcacagctaatacgatct : 600  
 AAGTATAGGTTTCATGGAGGCCGTGGTCGAGAAGCAAGGAGAAGGCTTTCCGCCGCGGGAGAGGGGAAAGGGAGGTGGGCCCTCACAGCTAATCGATCT

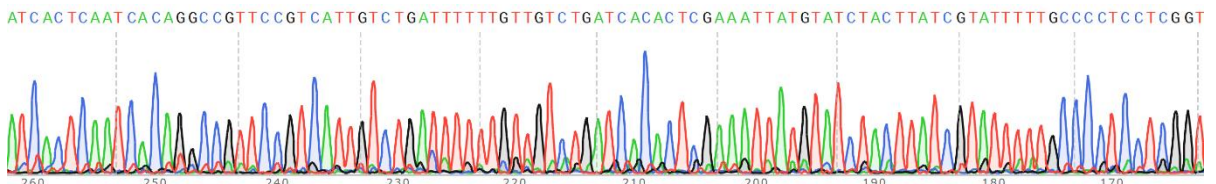

PCR\_C4 : atcaactcaatcacaggccgttccgtcattgtctgattttttgtgtctgatcacaactcgaaattatgtatctacttatcgatttttgcccctcctcggt : 700  
 r08\_C4 : atcaactcaatcacaggccgttccgtcattgtctgattttttgtgtctgatcacaactcgaaattatgtatctacttatcgatttttgcccctcctcggt : 700  
 ATCACTCAATCACAGGCCGTTCCGTCATTGTCTGATTTTGTGTCTGATCACACTCGAATTATGTATCTACTTATCGTATTTTGGCCCTCCTCGGT



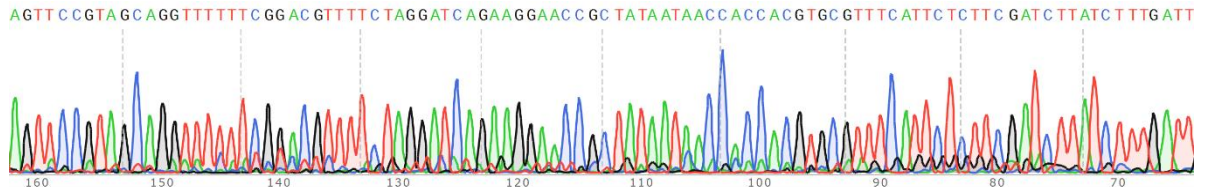

PCR\_C4 : agttccgtagcagggttttttcggacgttttctaggatcagaaggaaccgctataataaccaccacgtgctgtttcattctcttcgatcttatctttgatt : 800  
 r08\_C4 : agttccgtagcagggttttttcggacgttttctaggatcagaaggaaccgctataataaccaccacgtgctgtttcattctcttcgatcttatctttgatt : 799  
 AGTTCGTCAGCAGGTTTTTCGGACGTTTTCTAGGATCAG AAGGAACCGCTATAATAACCACCACGTCGTTTCATTCTCTTCGATCTTATCTTTGATT

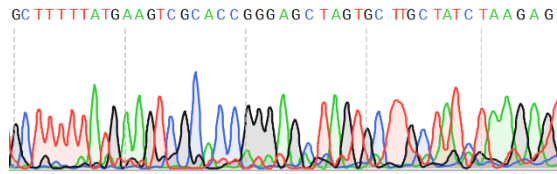

PCR\_C4 : gctttttatgaagtgcacccgggagctagtgccttgctatctaagag : 846  
 r08\_C4 : gctttttatgaagtgcacccgggagctagtgccttgctatctaagag : 845  
 GCTTTTATGAAGTCGCACCCGGGAGCTAGTGCCTTGCTATCTAAGAG

i

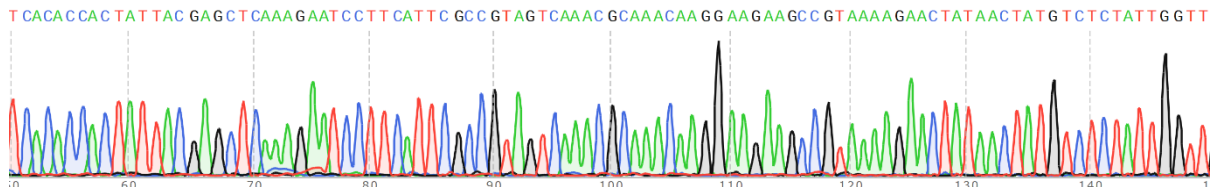

PCR\_C1 : tcacaccactattacgagctcaaagaatccttcattgcgcgtagtcacacgcaaacgaaggaagccgtaaaagaactataactatgtctctattgggt : 100  
 r09\_C1 : tcacaccactattacgagctcaaagaatccttcattgcgcgtagtcacacgcaaacgaaggaagccgtaaaagaactataactatgtctctattgggt : 100  
 TCACACCAC TATTAC GAGCTCAAAGAAATCCTTCATTTCGCCTAGTCAAACGCAAACAA GGAAGAAAGCCGTAAAAGAACTATAACTATGTCTCTATTGTT

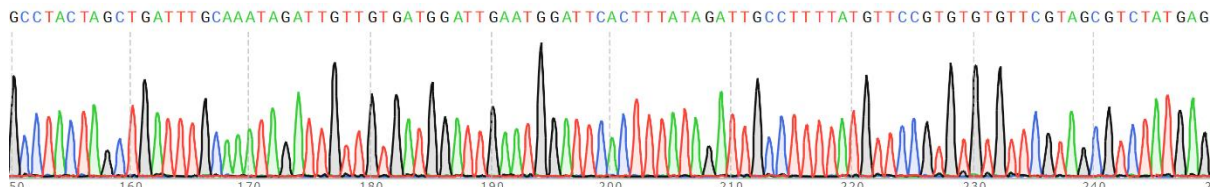

PCR\_C1 : gcctactagctgatttgcaaataagattgtgtgatggattgaatggattcactttatagattgccttttatgttccgtgtgtgttcgtagcgtctatgag : 200  
 r09\_C1 : gcctactagctgatttgcaaataagattgtgtgatggattgaatggattcactttatagattgccttttatgttccgtgtgtgttcgtagcgtctatgag : 200  
 GCCTACTAGCTGATTGCAAATAGATTGTTGTGATGGATTGAATTCACCTTTATAGATTGCCTTTTATGTTCCGTGTGTGTTCTGATGCTATGAG

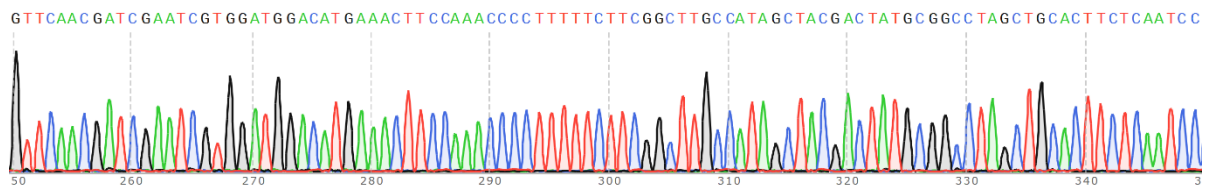

PCR\_C1 : gttcaacgatcgaatcggtgatggacatgaaacttccaaaccccttttcttcggttgccatagctacgactatgcggcctagctgcacttctcaatcc : 300  
 r09\_C1 : gttcaacgatcgaatcggtgatggacatgaaacttccaaaccccttttcttcggttgccatagctacgactatgcggcctagctgcacttctcaatcc : 300  
 GTTCAACGATCGAATCGTGGAATGGAATGAACTTCAAACCCCTTTTCTTCG6CTTGCATAGCTACGACTATGCG6CCTAGCTGCACTTCTCAATCC

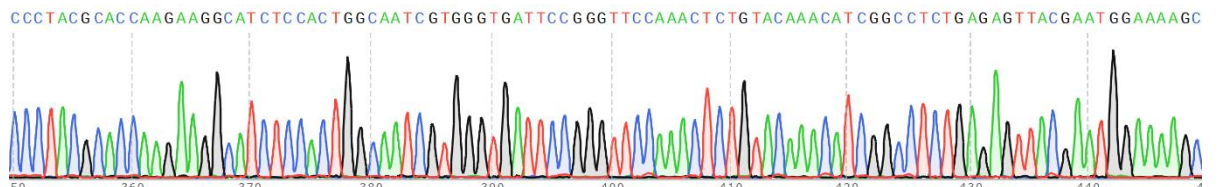

PCR\_C1 : ccctacgcaccaagaaggcatctccactggcaatcggtgggtgattccgggttccaaactctgtacaaacatcggcctctgagagttacgaatggaaaagc : 400  
 r09\_C1 : ccctacgcaccaagaaggcatctccactggcaatcggtgggtgattccgggttccaaactctgtacaaacatcggcctctgagagttacgaatggaaaagc : 400  
 CCCTACGCACCAAGGAGGATCTCCACTGGCAATCGTGGTGATTCCGGGTTCCAAACTCTGTACAACATCGGCTCTGAGAGTTACGAATGGAAAAGC

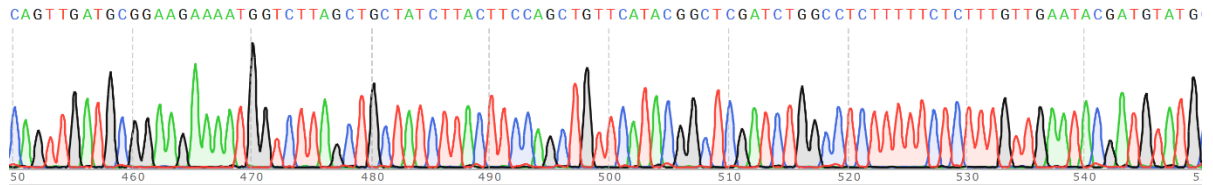

PCR\_C1 : cagttgatgcggaagaaatgggtcttagctgctatcttacttccagctgttcacacggctcgatctggcctcttttctctttgttgaatacagatgtatg : 500  
 r09\_C1 : cagttgatgcggaagaaatgggtcttagctgctatcttacttccagctgttcacacggctcgatctggcctcttttctctttgttgaatacagatgtatg : 500  
 CAGTTGATGCGGAAGAAATGGTCTTAGCTGCTATCTTACTTCCAGCTGTTTCATACGGCTCGATCTGCGCTCTTTTCTCTTTGTTGAATACGATGTATG

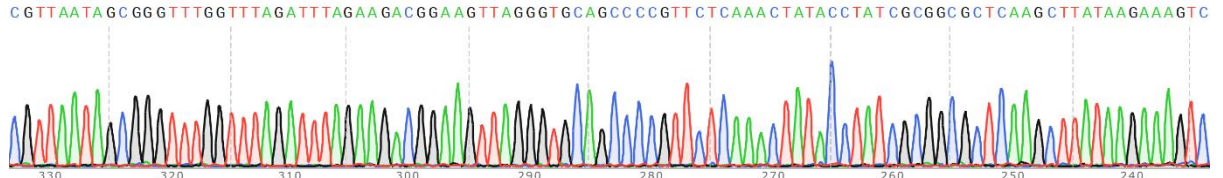

PCR\_C1 : cgттаатaгсgggттггттaгattтагааgacggaagttagggтсacgccccгттсtсaaactatacctatсggcgсgсtсaaгсттатааgaaagtс : 600  
 r09\_C1 : cgттаатaгсgggттггттaгattтагааgacggaagttagggтсacgccccгттсtсaaactatacctatсggcgсgсtсaaгсттатааgaaagtс : 600  
 CGTTAATAGCGGGTTTGGTTAGATTAGAAGACGGAAGTTAGGGTGCAGCCCGTTCTCAAACCTATACCTATCGCGCGCTCAAGCTTATAAGAAAGTC

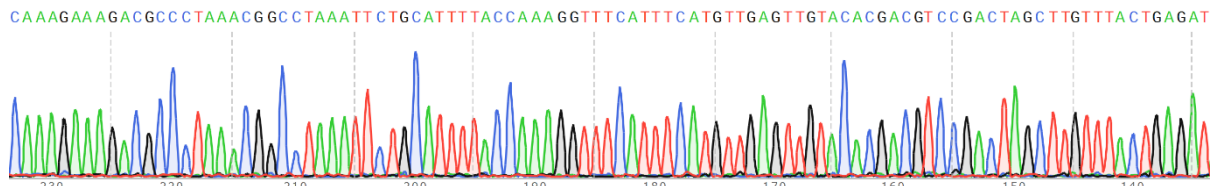

PCR\_C1 : caaаgaaаgacgсссtааacgссtааattсtgсattттaccaaаggттtсattтсatгттgаgtтgtacacgacгtссgactаgсттgттtactgаgаt : 700  
 r09\_C1 : caaаgaaаgacgсссtааacgссtааattсtgсattттaccaaаggттtсattтсatгттgаgtтgtacacgacгtссgactаgсттgттtactgаgаt : 700  
 CAAAGAAAGACGCCCTAAACGCGCTAAATTCGCAATTTACCAAAGGTTTCATTTATGTTGAGTTGTACACGACGTCGACCTAGCTTGTTTACTGAGAT

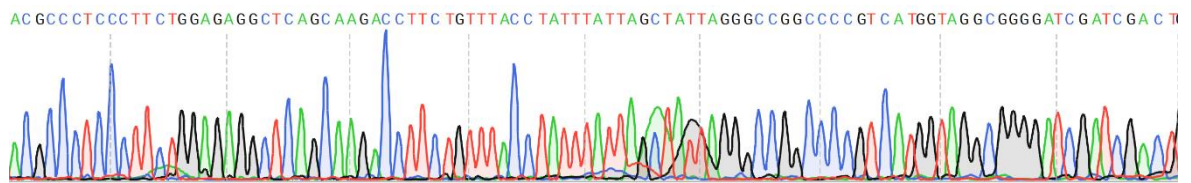

PCR\_C1 : acgсссtсссттсtggaгagгсtсagсaaгacттсгттtaccттattттaгсtattаgгссgссссгtсatггtagгсггггatсgаtсgасt : 798  
 r09\_C1 : acgсссtсссттсtggaгagгсtсagсaaгacттсгттtaccттattттaгсtattаgгссgссссгtсatггtagгсггггatсgаtсgасt : 798  
 ACGCCCTCCCTTCTGGAGAGGCTCAGCAAGACCTTCGTTTACCTATTTATTAGCTATTAGGGCCGGCCCGTCATGGTAGGGGGATCGATCGACT

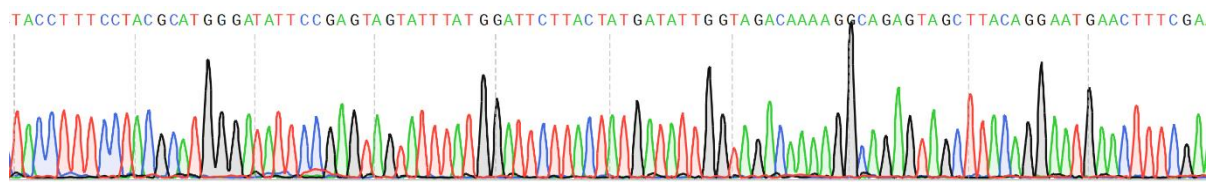

PCR\_C2 : tacттттсtсacгсatгггatттссgаgtagттттatггattсtсactatгatattггtagacaaaаggсagаgtagттсacггaатгаactттсga : 100  
 r09\_C2 : tacттттсtсacгсatгггatттссgаgtagттттatггattсtсactatгatattггtagacaaaаggсagаgtagттсacггaатгаactттсga : 100  
 TACCTTTCTACGCATGGGATTTCCGAGTAGTATTATGGATTCTTACTATGATATTGGTAGACAAAAGGCAGAGTAGCTTACAGGAATGAACTTTCGA

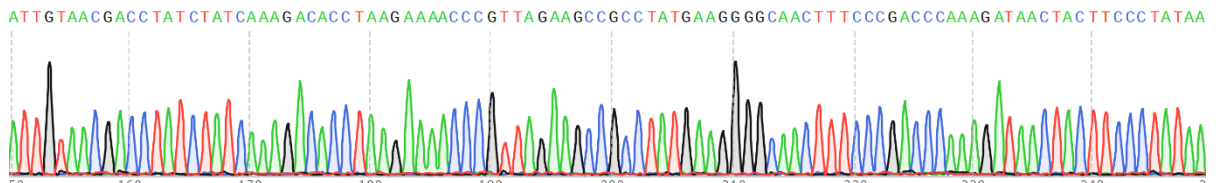

PCR\_C2 : attgтаacгacсtатсtатсaaаgacсtааgaaaаccгттaгаагсгссtатгааггггсaaсттсссгacссaaаgатаactactтссctатаа : 200  
 r09\_C2 : attgтаacгacсtатсtатсaaаgacсtааgaaaаccгттaгаагсгссcтатгааггггсaaсттсссгacссaaаgатаactactтссctатаа : 200  
 ATTGTAAAGACCTATCTATCAAAGACCTAAGAAAACCGTTAGAAGCGCCTATGAAGGGGCAACTTTCCCGACCCAAAGATACTACTTCCTATAA

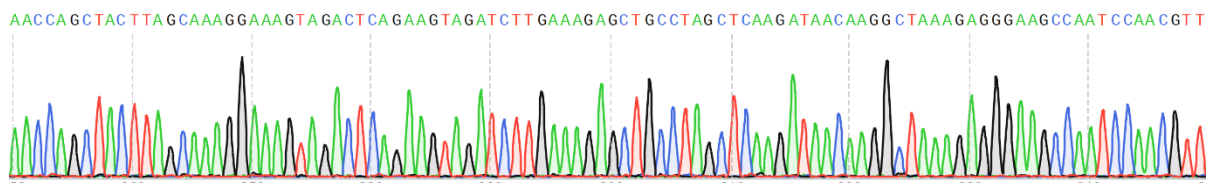

PCR\_C2 : аaccагсtacttagсaaаggaaаgtagactсagaаgtagatсттgaaаgагсtgссtаgсtсaaгатаасaaггсtаааgаgggааgссaatссaaсгтт : 300  
 r09\_C2 : аaccагсtacttagсaaаggaaаgtagactсagaаgtagatсттgaaаgагсtgссcтaгсtсaaгатаасaaггсtаааgаgggааgссaatссaaсгтт : 300  
 AACCAGCTACTTAGCAAAGGAAAGTAGACTCAGAAGTAGATCTTGAAAGAGCTGCCTAGCTCAAGATAACAAGGCTAAAGAGGGAAGCCAATCCAACGTT



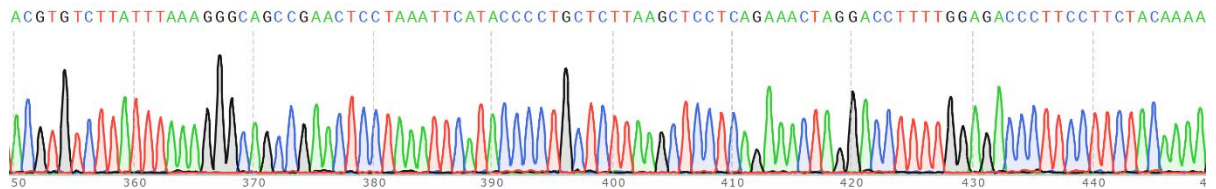

PCR\_C2 : acgtgtcttattttaaagggcagccgaactcctaaattcataccctgctcttaagctcctcagaaactaggaccttttggagacccttccttctacaaaa : 400  
 r09\_C2 : acgtgtcttattttaaagggcagccgaactcctaaattcataccctgctcttaagctcctcagaaactaggaccttttggagacccttccttctacaaaa : 400  
 ACGTGCTTATTTAAAGGGCAGCGAACTCCTAAATTCATACCCCTGCTCTTAAAGCTCCTCAGAACTAGGACCTTTTGGAGACCTTCCTTCTACAAA

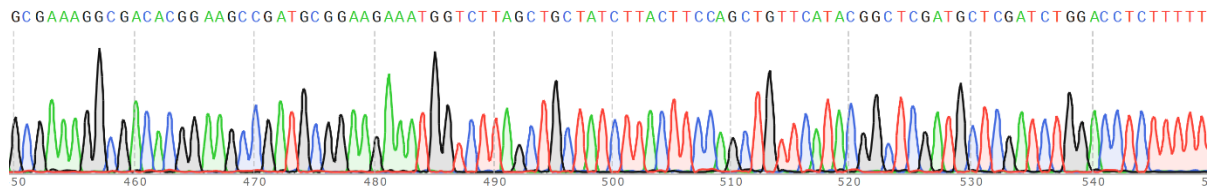

PCR\_C2 : gcgaaaggcgacacggaagccgatgcggaagaaatggtcttagctgctatcttacttcacagctgttcatacggctcgatgctcgatctggacctcttttt : 500  
 r09\_C2 : gcgaaaggcgacacggaagccgatgcggaagaaatggtcttagctgctatcttacttcacagctgttcatacggctcgatgctcgatctggacctcttttt : 500  
 GCGAAAGGCGACACGGAGGCCGATGCGGAAGAAATGGTCTTAGCTGCTATCTTACTTCCAGCTGTTTCATACGGCTCGATGCTCGATCTGGACCTCTTTTT

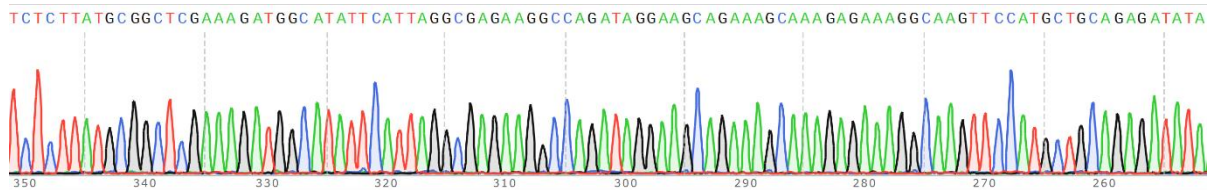

PCR\_C2 : tctcttatgctggctcgaaagatggcatattcattagcgagaagccagataggaagcagaaagcaagagaaaggaagttccatgctgcagagatata : 600  
 r09\_C2 : tctcttatgctggctcgaaagatggcatattcattagcgagaagccagataggaagcagaaagcaagagaaaggaagttccatgctgcagagatata : 600  
 TCTCTTATGCGGCTCGAAA GATGGC ATATT CATTAGCGGAGAA GGCAGATA GGAAAGCAGAAAGCAAA GAGAAAGGCAAGTTCCATGCTGCA GAGATATA

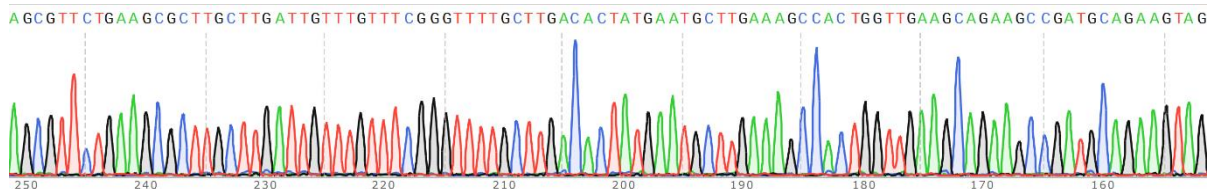

PCR\_C2 : agcgttctgaagcgcttgcttgattggttgcgggttttgccttgacactatgaatgcttgaaagccactggttgaaagcagaagccgatgcagaagtag : 700  
 r09\_C2 : agcgttctgaagcgcttgcttgattggttgcgggttttgccttgacactatgaatgcttgaaagccactggttgaaagcagaagccgatgcagaagtag : 700  
 AGCGTTCTGAAGCGCTTGCTTGATTGTTTGGTTCGGGTTTCTTGACACTATGAATGCTTGAAAGCCACTGTTGAAAGCAGAAGCCGATGCAGAAGTAG

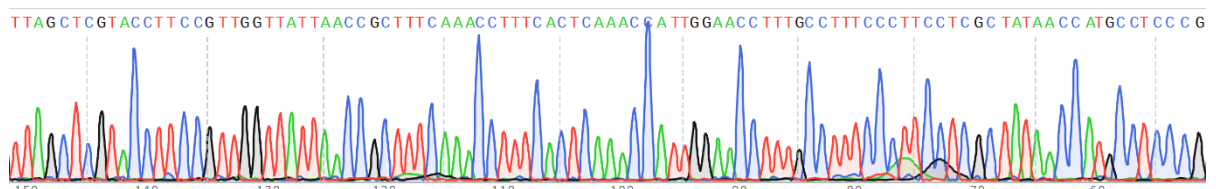

PCR\_C2 : ttagctcgtagcttccggttggttattaaaccgctttcaaacctttcactcaaacattggaacctttgcctttcccttctcgtatataaacatgcctcccg : 800  
 r09\_C2 : ttagctcgtagcttccggttggttattaaaccgctttcaaacctttcactcaaacattggaacctttgcctttcccttctcgtatataaacatgcctcccg : 800  
 TTAGCTCGTACCTTCGTTGGTTATTAAACC GCTTCAAACCTTTCCTCAAACTATTGGAACCTTTGCCTTCCCTTCTCGCTATAAACC ATGCTCCCG

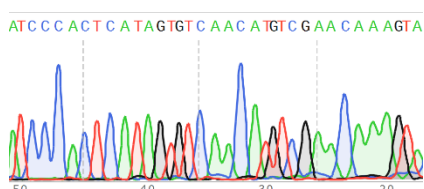

PCR\_C2 : atcccaactcatagtgtcaacatgtcgaacaaagta : 835  
 r09\_C2 : atcccaactcatagtgtcaacatgtcgaacaaagta : 835  
 ATCCCACTCATAGTGTCAACATGTCGAA CAAAGTA

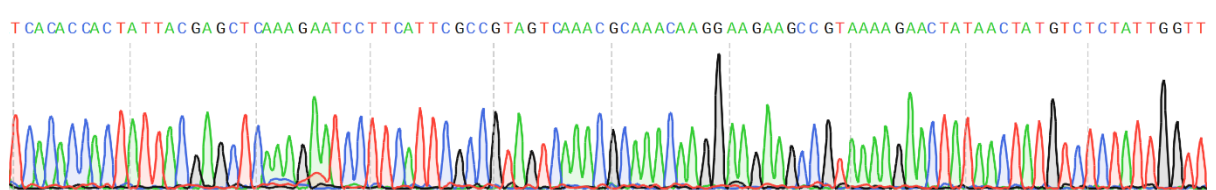

PCR\_C3 : tcacaccactattacagagctcaagaatccttcattgcgctagtcacaaagcaaacaggaagcgtataaagaactataaactatgtctctattgggtt : 100  
 r09\_C3 : tcacaccactattacagagctcaagaatccttcattgcgctagtcacaaagcaaacaggaagcgtataaagaactataaactatgtctctattgggtt : 100  
 TCACACCCTATTACAGCTCAAGAAATCCTTCATTTCGCGTAGTCAAAAGCAAAAGGAAAGGCGTAAAA GAACATAAATAATGTCTCTATTGGTT





CGTTGGTTATTAAACGCTTTCAAACCTTTCACTCAAACCATTTGGAACCTTTGCCTTTCCCTTCCTCGCTATAACCATGCCTCCCGATCCCACCTCATAGTG

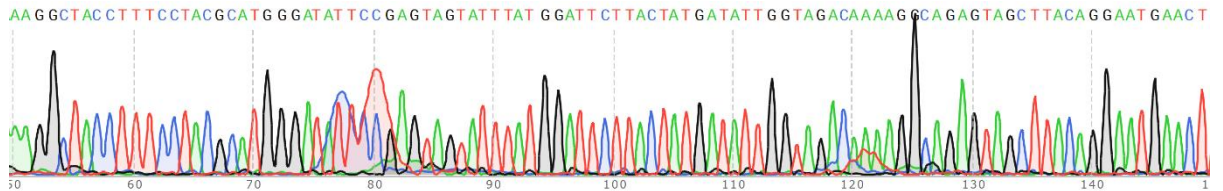

PCR\_C4 : aaggctaccttttctacgcgatgggatattccgagtagtatttatggattcttactatgatattggtagacaaaaggcagagtagcttacaggaatgaact : 100  
r09\_C4 : aaggctaccttttctacgcgatgggatattccgagtagtatttatggattcttactatgatattggtagacaaaaggcagagtagcttacaggaatgaact : 100  
AAGGCTACCTTTCTACGCATGGGATATTCGAGTAGTATTATGGATTCTTACTATGATATTGGTAGACAAAAGGCAGAGTAGCTTACAGGAATGAAC T

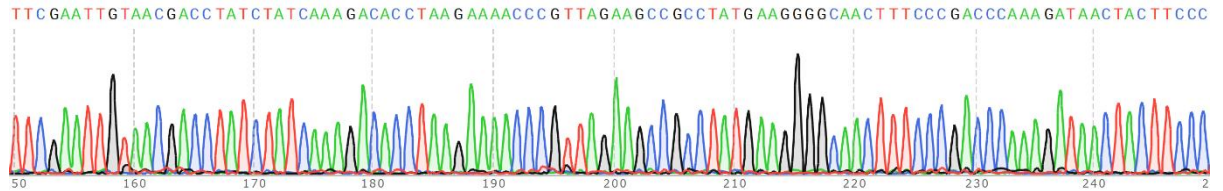

PCR\_C4 : ttcggaattgtaacgacctatctatcaaagacacctaagaaaacccggttagaagccgcctatgaaggggcaactttcccgacccaaagataactacttccc : 200  
r09\_C4 : ttcggaattgtaacgacctatctatcaaagacacctaagaaaacccggttagaagccgcctatgaaggggcaactttcccgacccaaagataactacttccc : 200  
TTCGAATTGTAACGACC TATCTATCAAAGACACCTAAGAAAACCCGTTAGAAAGCCGCCTATGAAGGGCAACTTTCCCGACCCAAAGATAACTACTTCCC

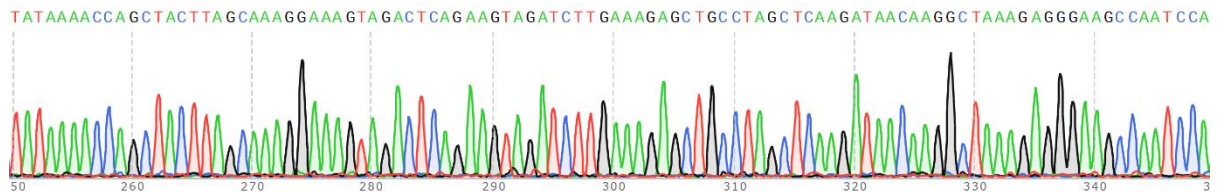

PCR\_C4 : tataaaaccagctacttagcaaaggaagtagactcagaagtagatcttgaaagagctgcctagctcaagataacaaggctaaaggggaagccaatcca : 300  
r09\_C4 : tataaaaccagctacttagcaaaggaagtagactcagaagtagatcttgaaagagctgcctagctcaagataacaaggctaaaggggaagccaatcca : 300  
TATAAAACCA GCTACTTA GCAAAGGAAAGTAGACTCAG AAGTAGATCTTGAAGAGCTGCCTAGCTCAAGATAACAAGGC TAAAGAGGGAAGC CAATCCA

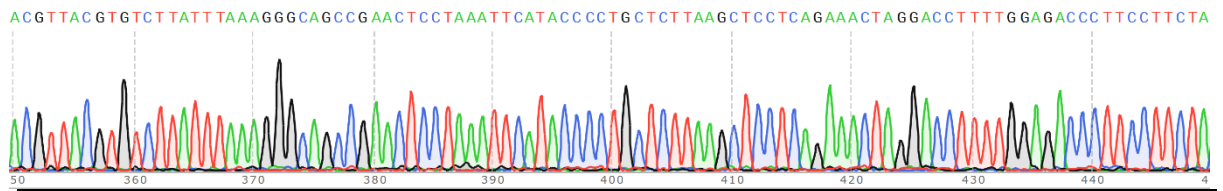

PCR\_C4 : acgttacgtgtcttatttaaagggcagccgaactcctaaattcataccctgctcttaagctcctcagaaactaggaccttttggagacccttccttcta : 400  
r09\_C4 : acgttacgtgtcttatttaaagggcagccgaactcctaaattcataccctgctcttaagctcctcagaaactaggaccttttggagacccttccttcta : 400  
ACGTTACGTGTCTTATTTAAAGGGCAGCCGAACCTCTAAATTCATACCCCTGCTCTTAAAGCTCCTCAGAACTAGGACCTTTTGGAAGCCCTCTCTTCTA

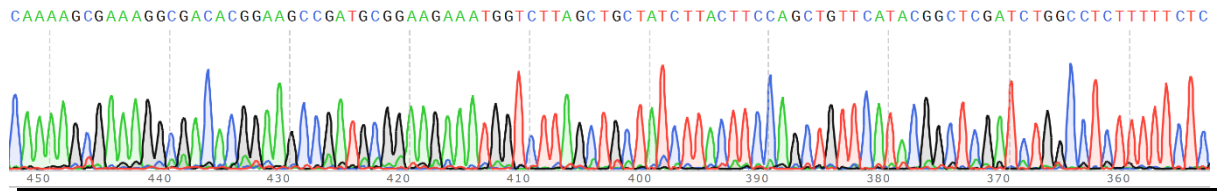

PCR\_C4 : caaaagcgaaagggcagacacggaagccgatgcggaagaaatggcttagctgctatcttacttccagctgttcacagcgtcgatctggcctctttttctc : 500  
r09\_C4 : caaaagcgaaagggcagacacggaagccgatgcggaagaaatggcttagctgctatcttacttccagctgttcacagcgtcgatctggcctctttttctc : 500  
CAAAAGCGAAAGGCGACACGGAAAGCCGATGCGGAGAAATG6TCTTAGCTGCTATCTTACTTCCAGCTGTTTATACGGCTCGATCTG6CCTCTTTTCTC

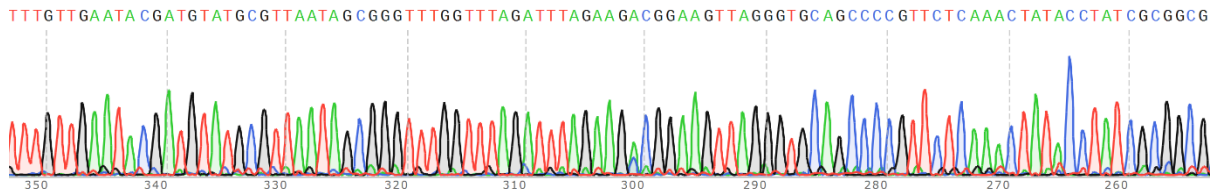

PCR\_C4 : ttgttgtaatacgaatgatgcgttaaatagcgggtttggtttagatttagaagacggaagtttaggggtgcagccccgttctcaaaactatacctatcgcgcg : 600  
r09\_C4 : ttgttgtaatacgaatgatgcgttaaatagcgggtttggtttagatttagaagacggaagtttaggggtgcagccccgttctcaaaactatacctatcgcgcg : 600  
TTTGTGTAATACGATGATGCGTTAATAGCGGGTTTGGTTTAGATTAGAAAGCAGGAGTTAGGGTGCAGCCCCGTTCTCAAACATATACCTATCGCGGCG

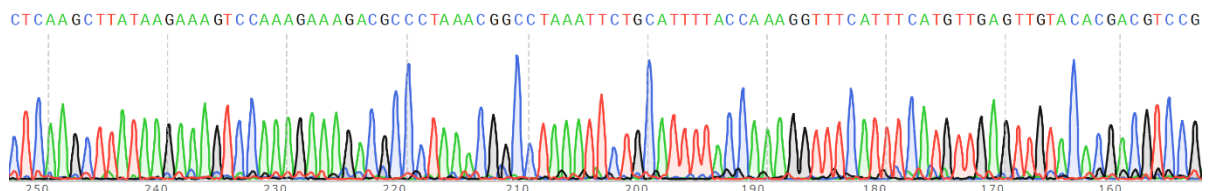

PCR\_C4 : ctcaagcttataaagaagtccaaagaagacgcccctaaacggcctaaattctgcattttaccaaagggtttcatttcatgttgagttgtacacgacgtccg : 700  
r09\_C4 : ctcaagcttataaagaagtccaaagaagacgcccctaaacggcctaaattctgcattttaccaaagggtttcatttcatgttgagttgtacacgacgtccg : 700  
CTCAAGCTTATAAGAAAGTCAAGAAAGACG6CCTAAACGGCTTAAATCTGCAATTTACCAAAGGTTTCAATTTATGTTGAGTTGTACAGCAGTCCG

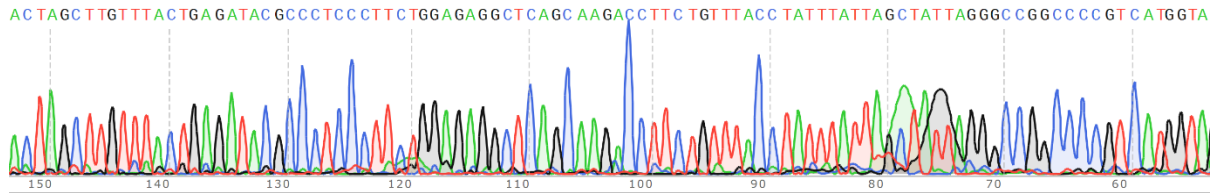

PCR\_C4 : actagcttggtttactgagatacgcctcccttctggagaggctcagcaagaccttctgtttacctatttattagctattagggccggccccgtcatggta : 800  
r09\_C4 : actagcttggtttactgagatacgcctcccttctggagaggctcagcaagaccttctgtttacctatttattagctattagggccggccccgtcatggta : 800  
ACTAGCTTGTTTACTGAGATACGCCCTCCCTTCTGGAGAGGCTCAGCAAGACCTTCTGTTTACCTATTTATTAGCTATTAGGGCCGGCCCCGTCATGGTA



Figure S8. Alignments of the long PacBio reads to the MTPT fragments in the mitogenome of *S. miltiorrhiza*. Panels a–p show the alignments of long PacBio reads to the ten MTPT fragments in MC1 (sami-mtpt-001 to sami-mtpt-010) and six MTPT fragments in MC2 (sami-mtpt-011 to sami-mtpt-016). The MTPT regions are indicated with the red lines having arrow heads at each end. The 2000 bp-long flanking sequences are indicated with a red line without arrow heads.

a

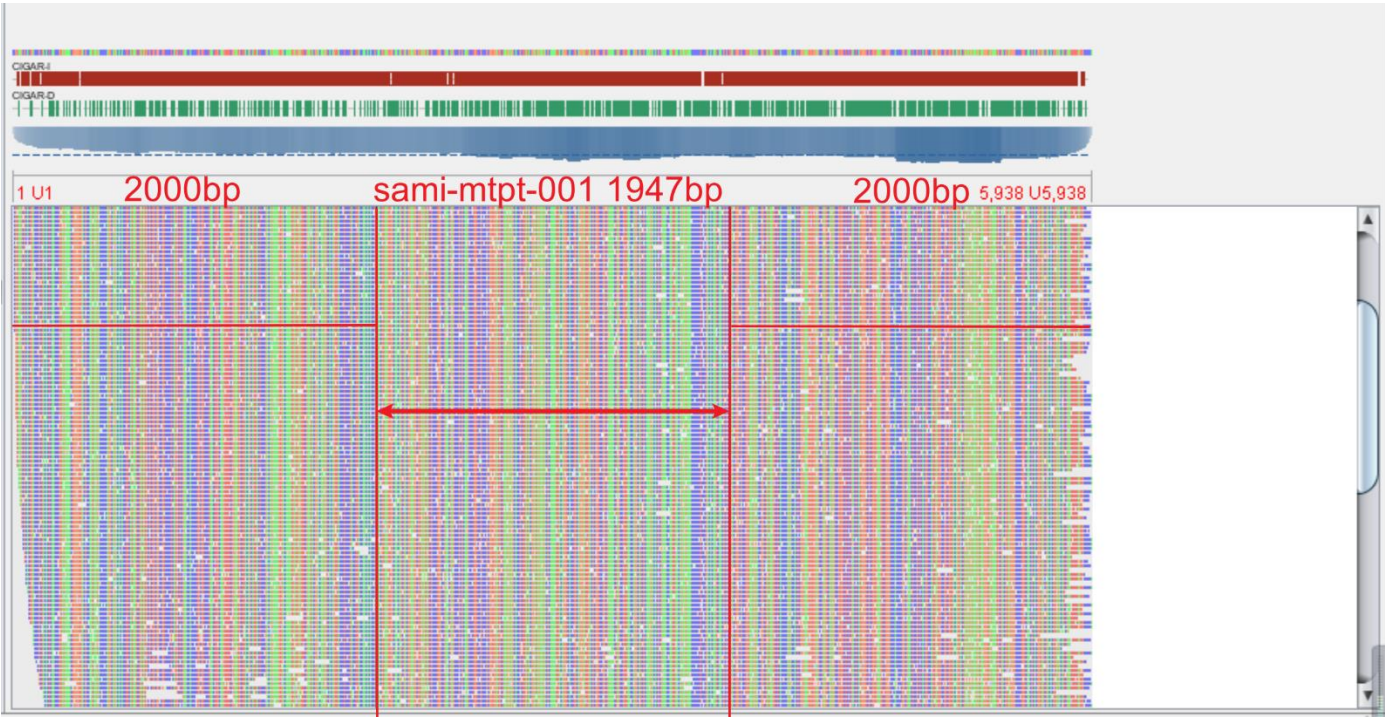

b

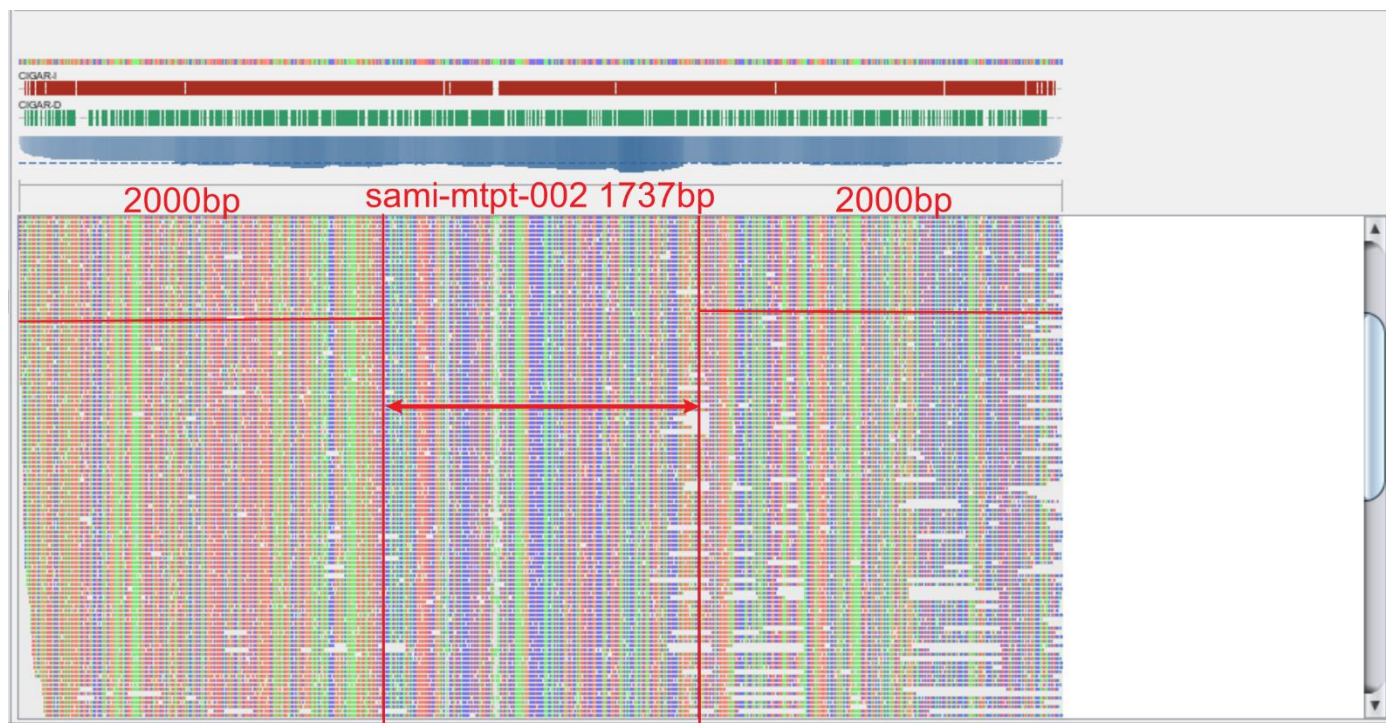



c

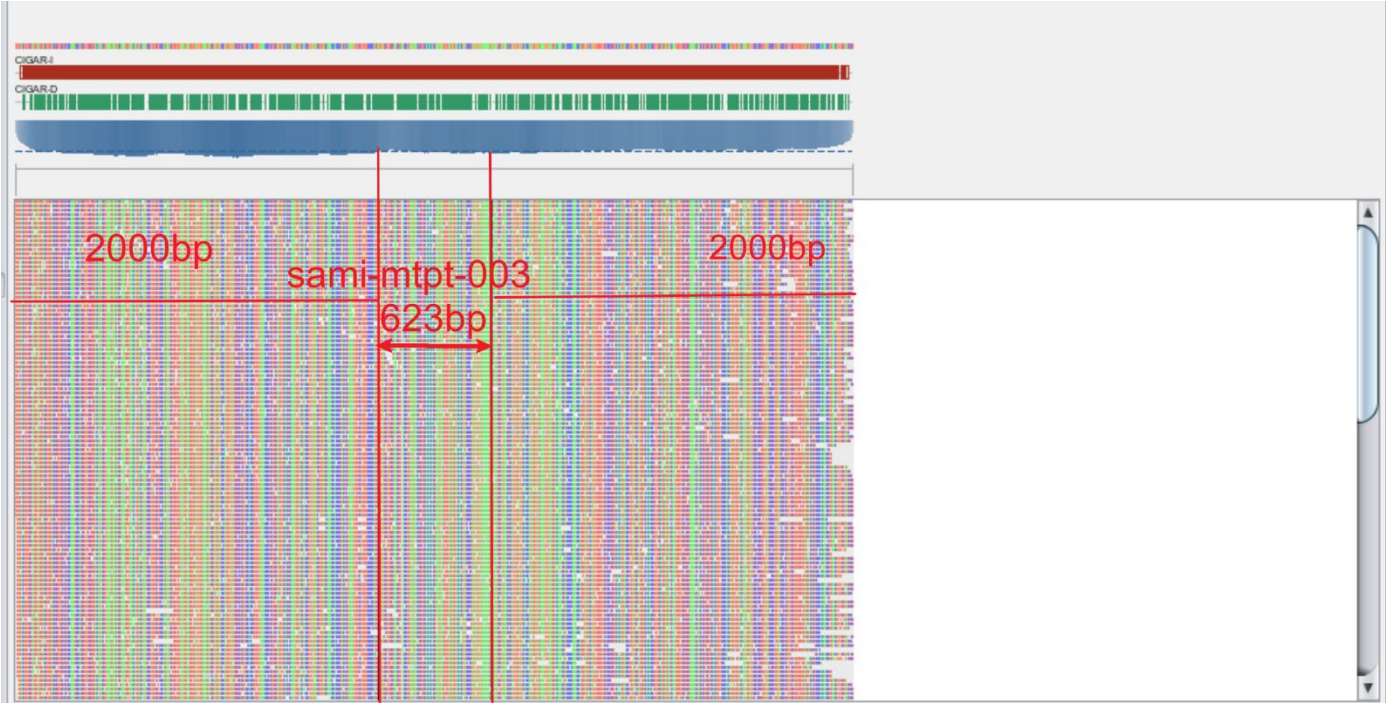

d

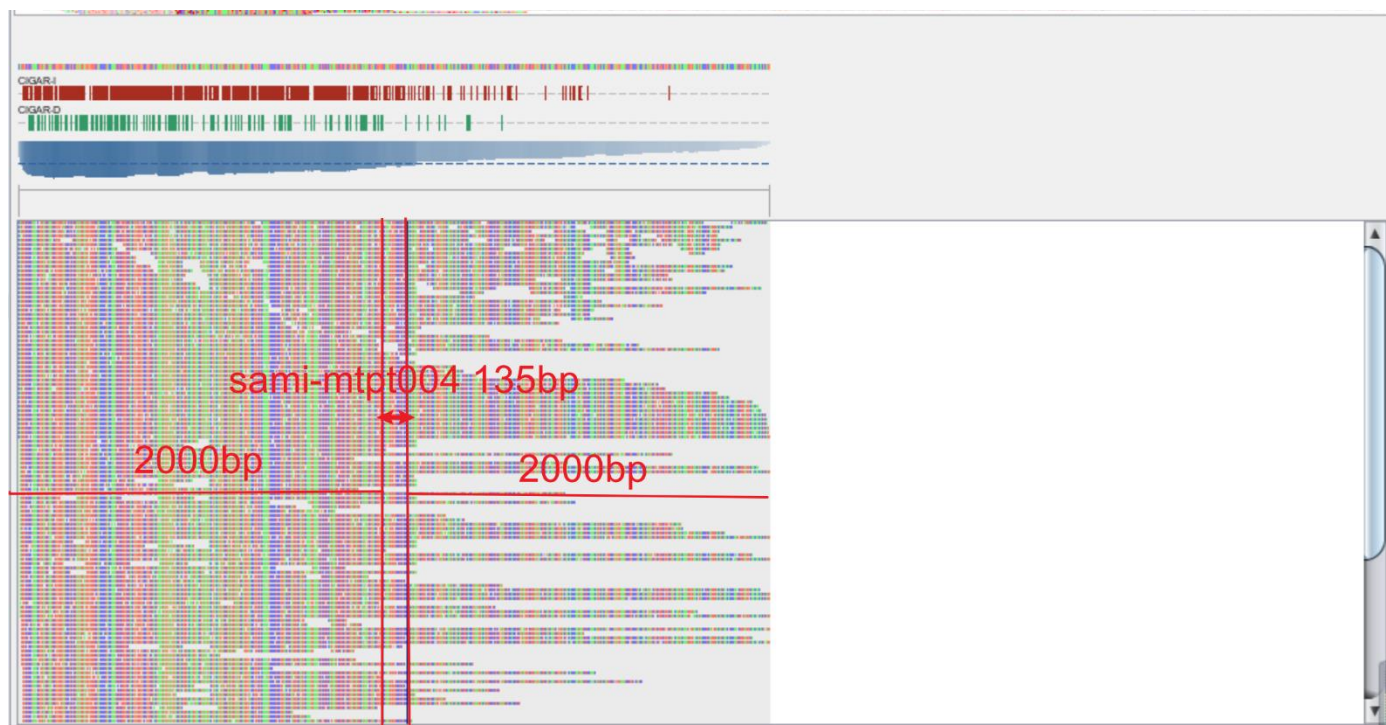



e

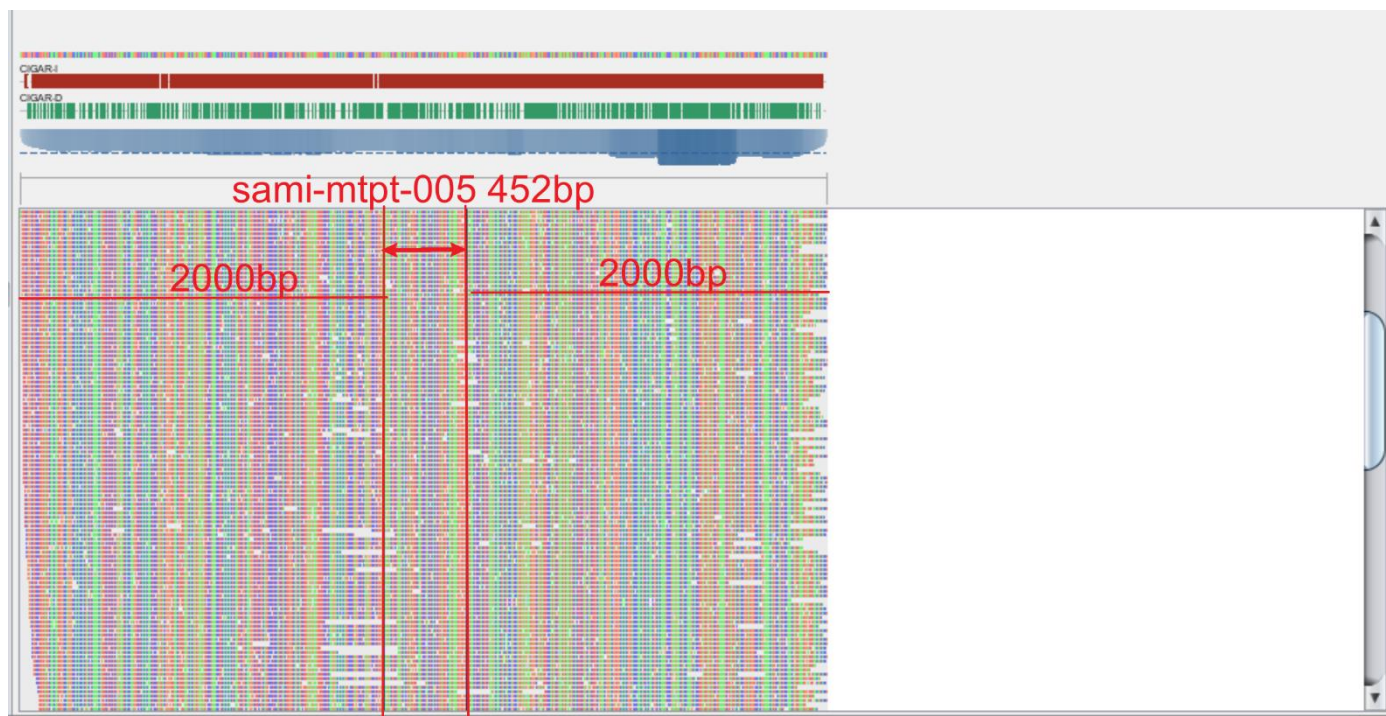

f

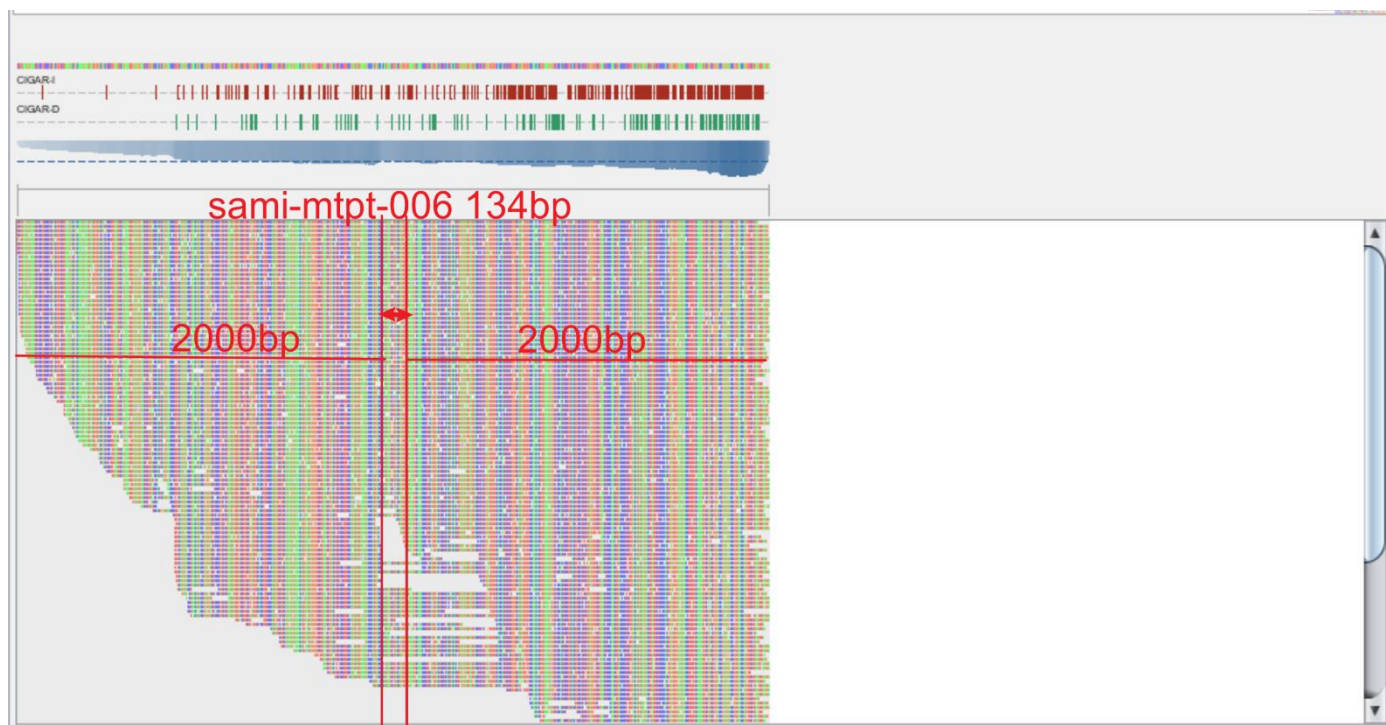



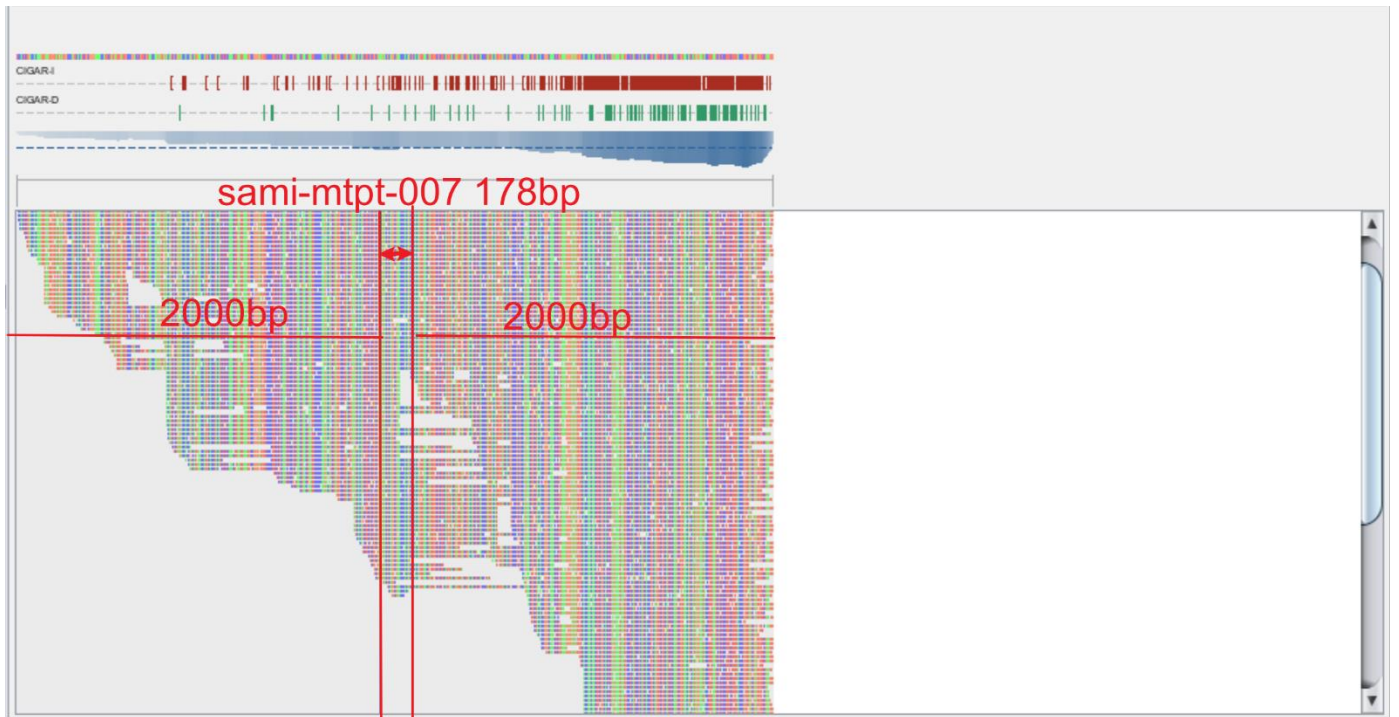

h

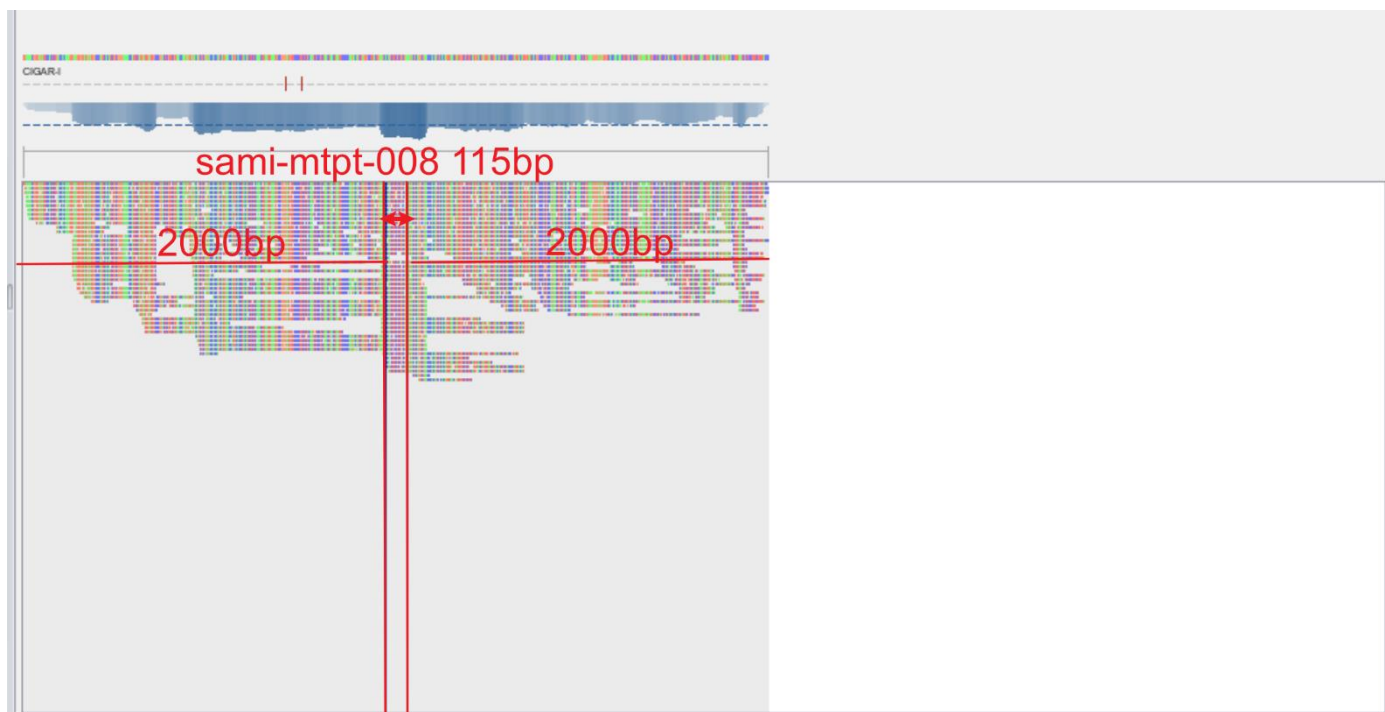

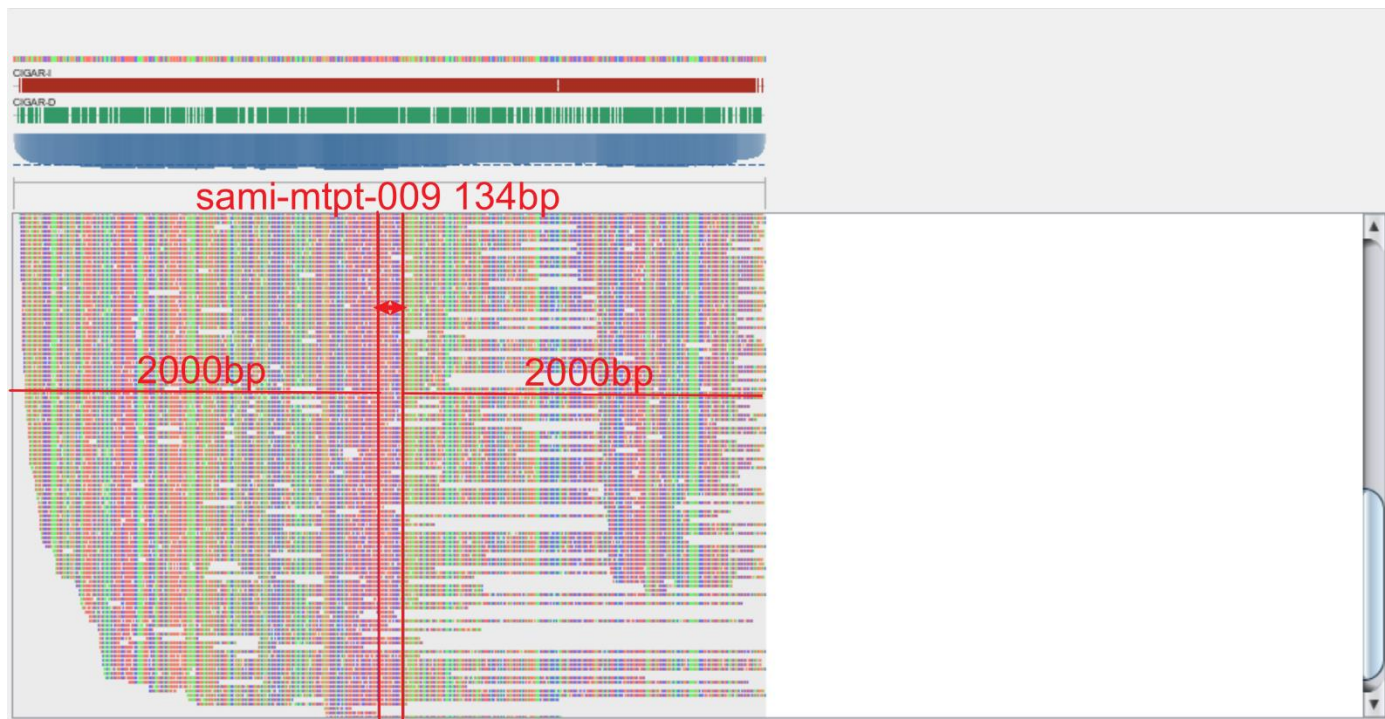



j

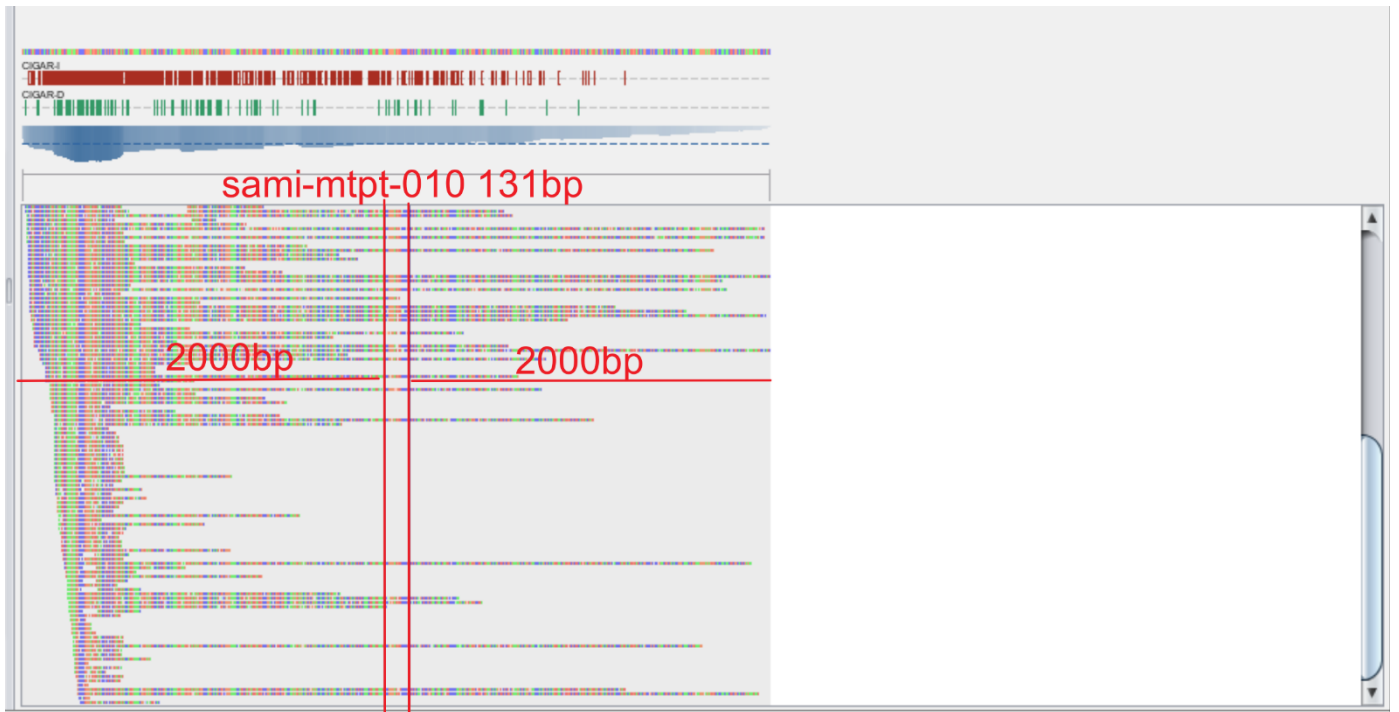

k

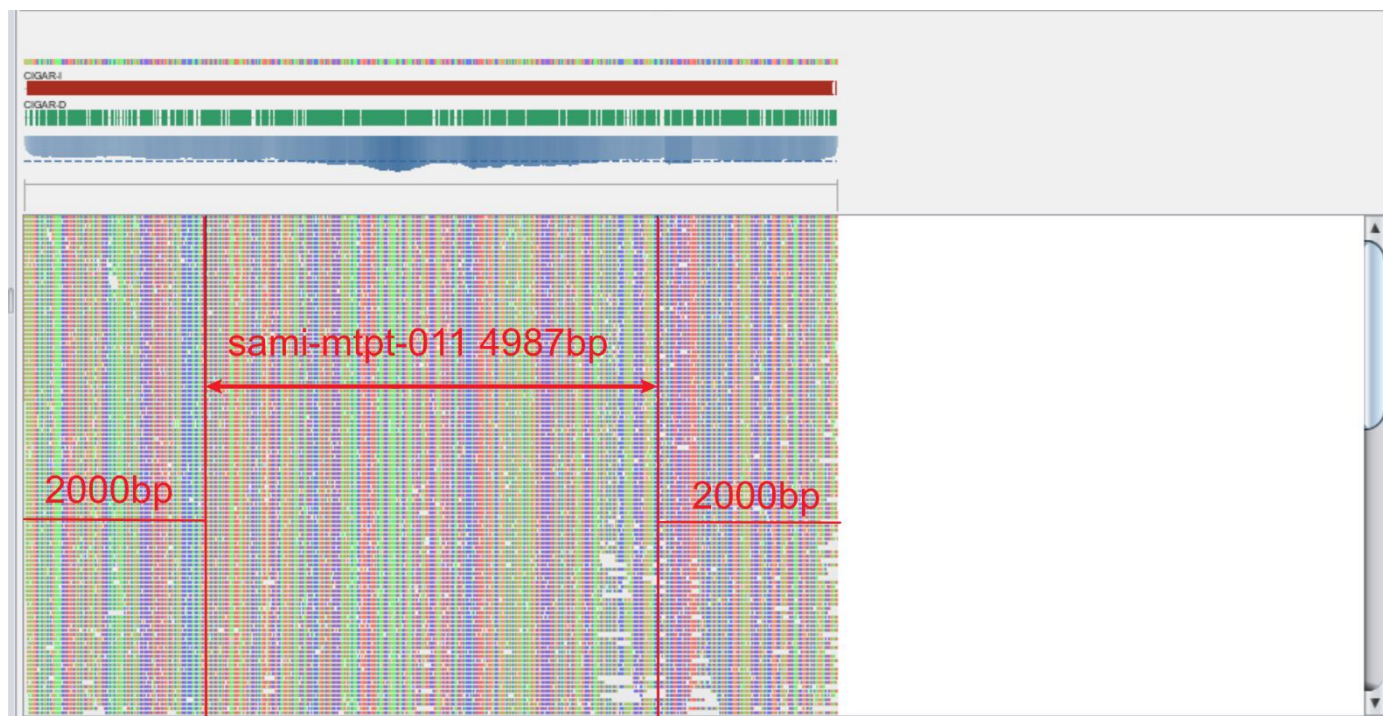

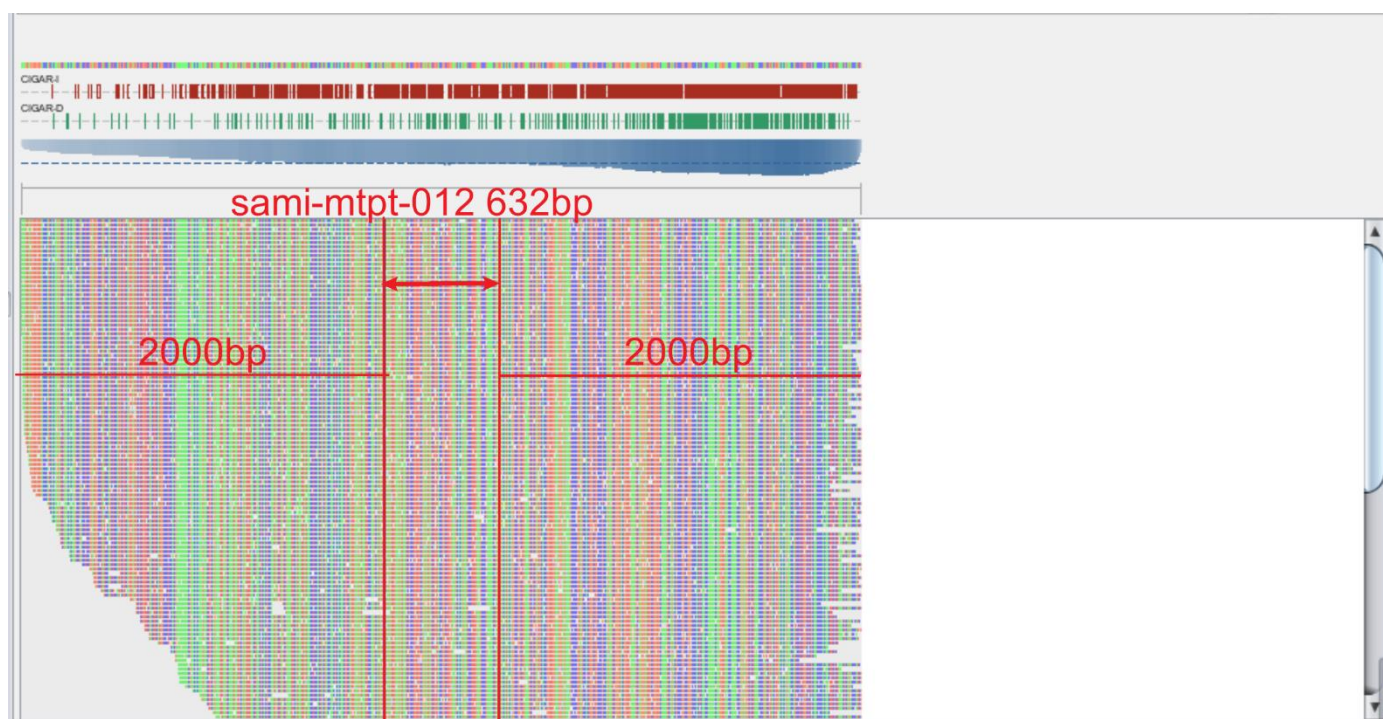



m

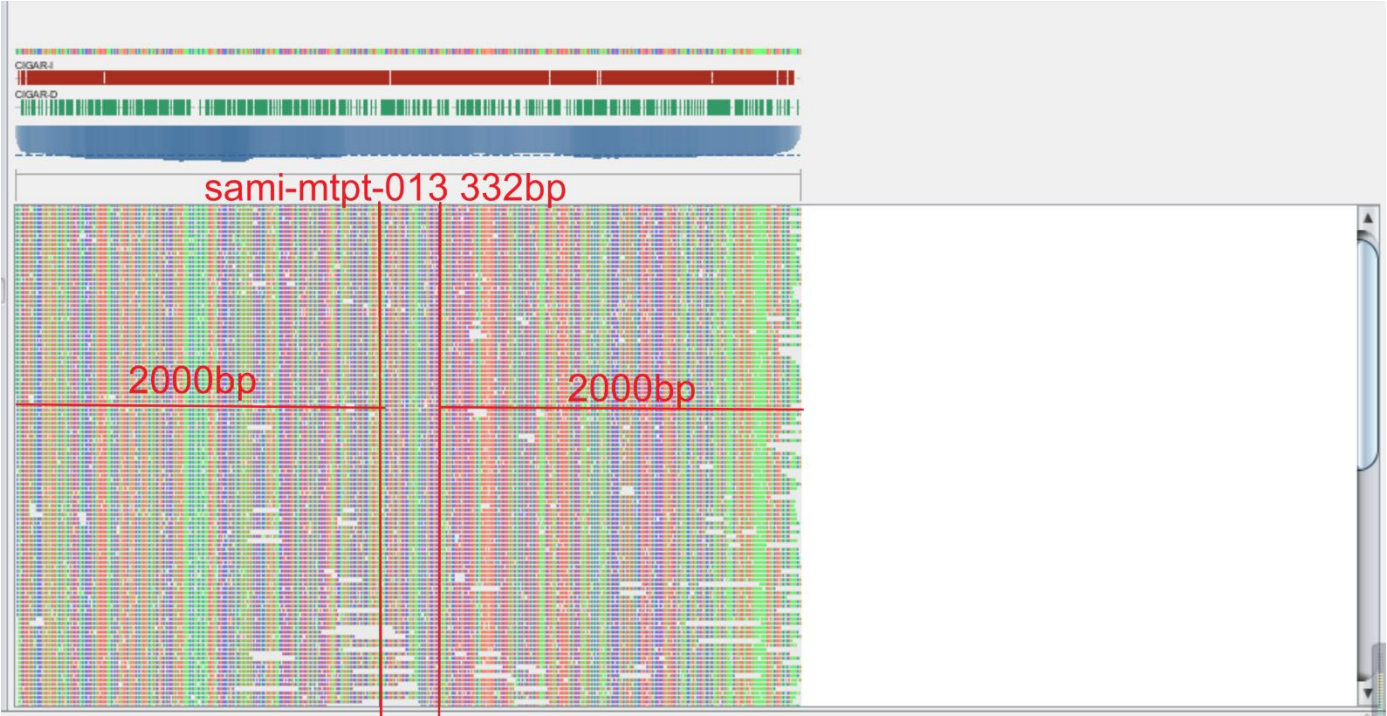

n

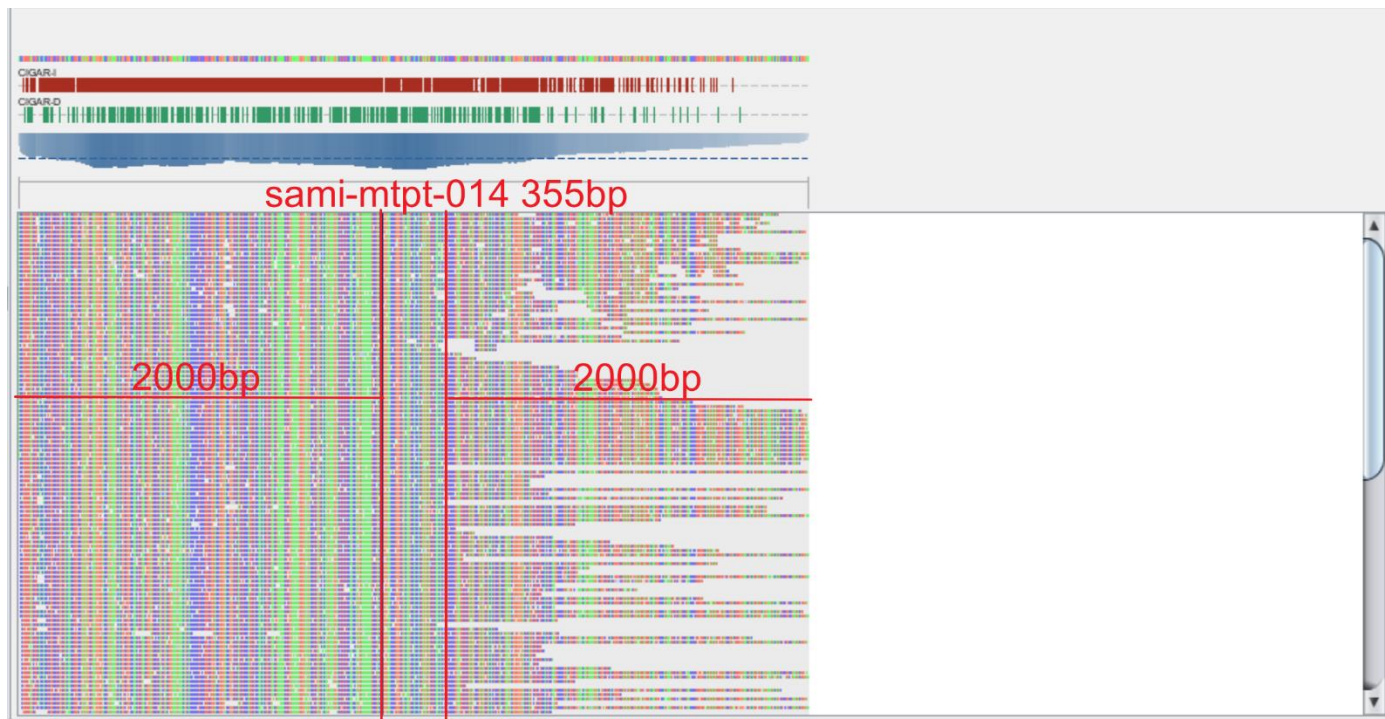

O

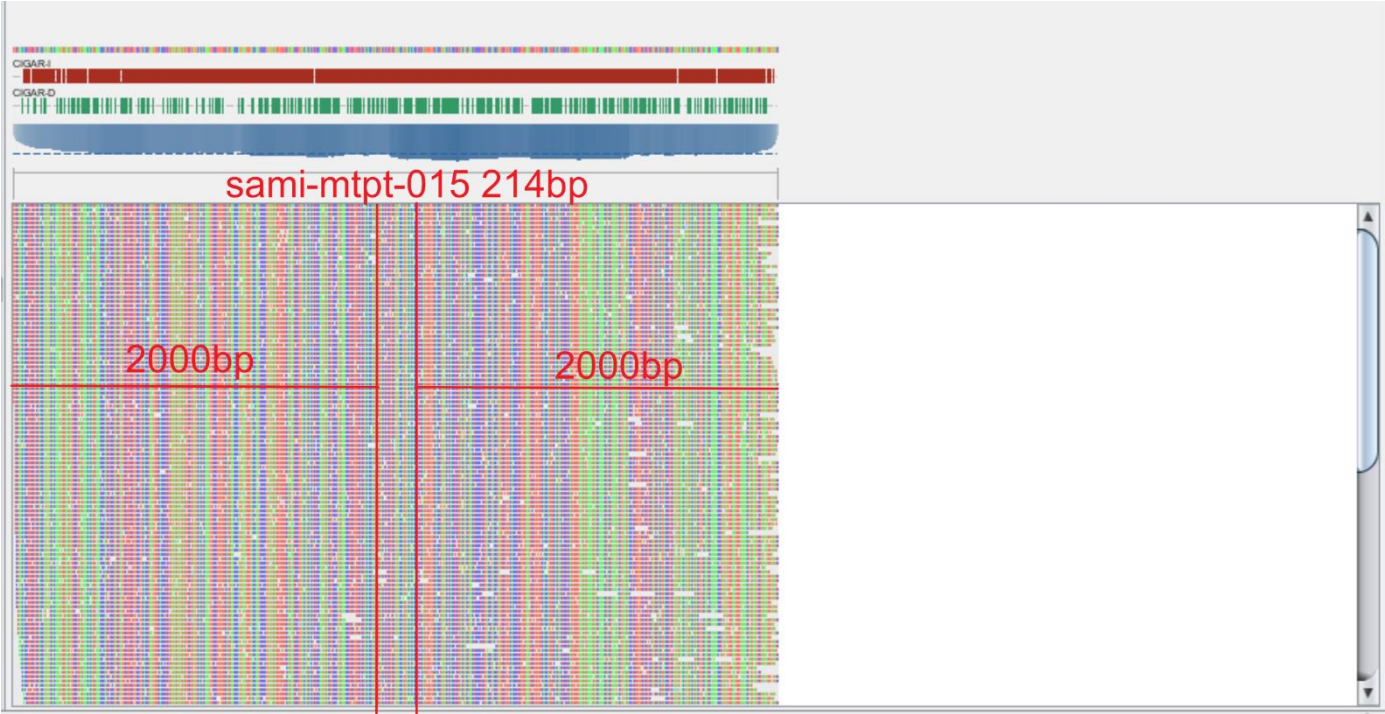



p

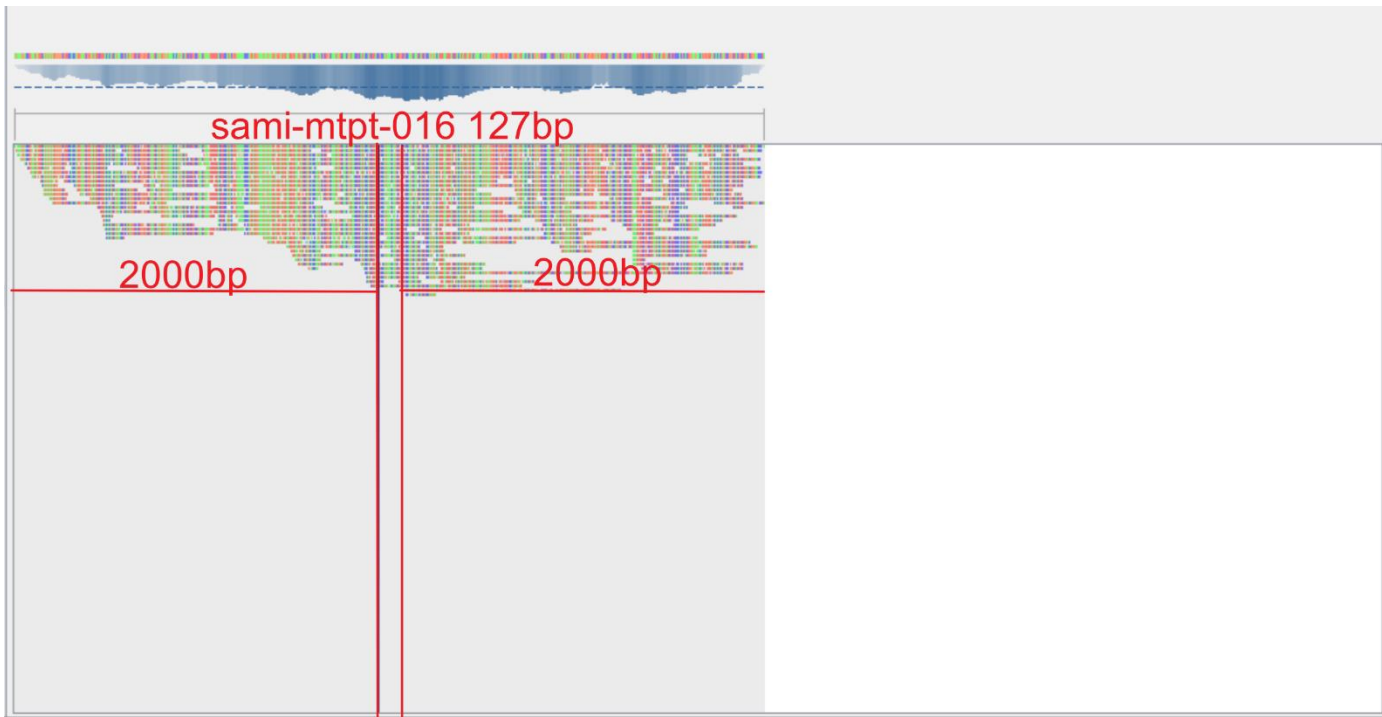

Figure S9. Boxplots of pairwise dN values for mitochondrial genes among the ten Lamiales plants.

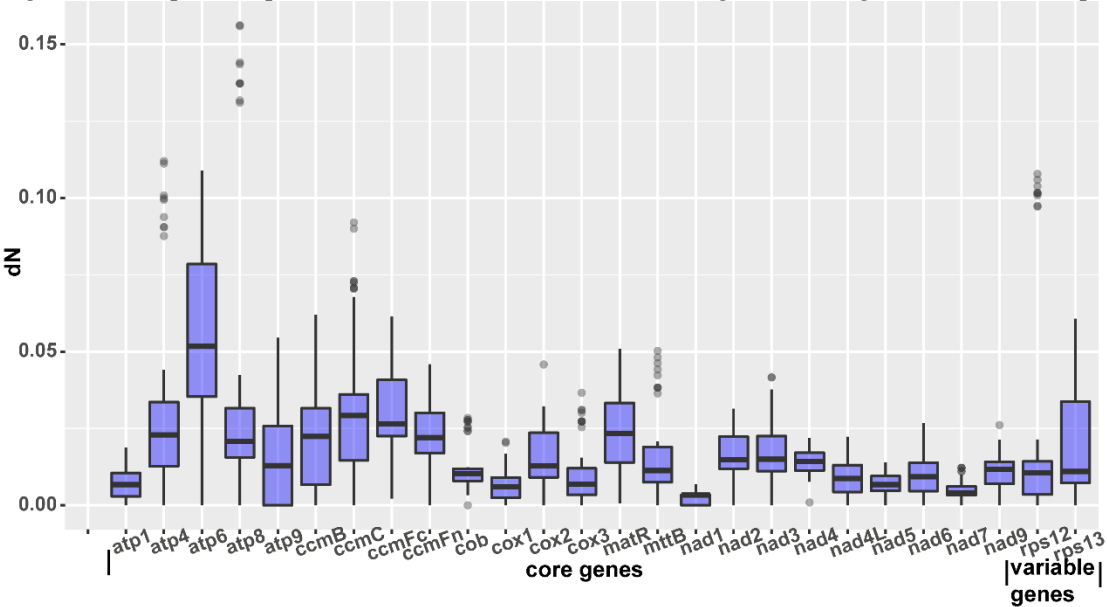

Figure S10. Boxplots of pairwise dS values for mitochondrial genes among the ten Lamiales plants.

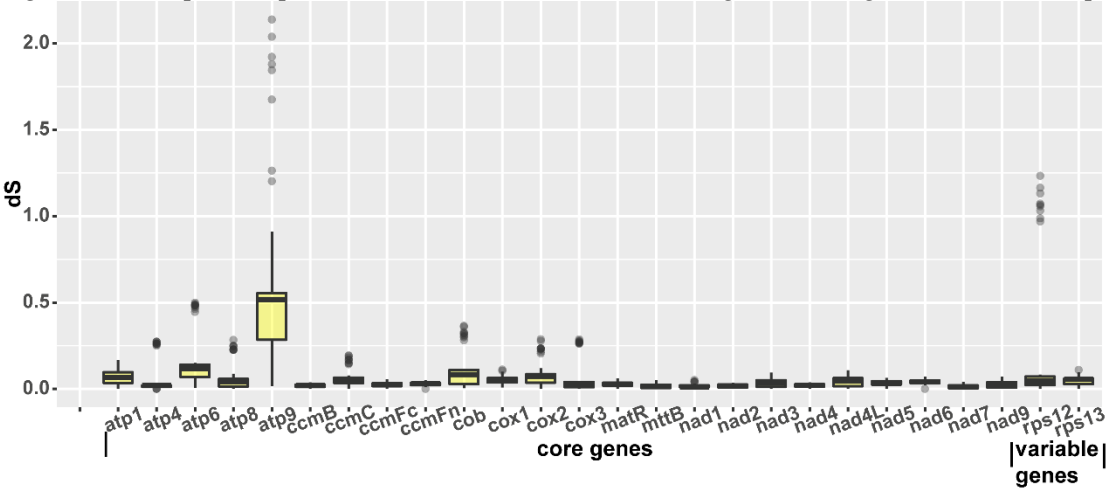



Supplementary File S1. DNA sequence of the plastome of *S. miltiorrhiza* assembled using the GetOrganelle toolkit.

Supplementary File S2. DNA sequences of the four possible conformations associated with the eleven HSPs (r01-r11) and their corresponding seven DBSs (bs01-bs07) in the mitogenome of *S. miltiorrhiza*.

Supplementary File S3. The alignment of the sequences of the 26 protein-coding genes of the ten Lamiales mitogenomes and the results of the pairwise dN, dS, and dN/dS values of each two species.
